# Supplementary material for: Epidemiology of a major honey bee pathogen, deformed wing virus: potential worldwide replacement of genotype A by genotype B
Source: PubMed Central journal article supplement (PMC9112108; doi:10.1016/j.ijppaw.2022.04.013), 2022-05-10
Supplement: mmc1.pdf [file mmc1.pdf]

## **Supplementary Information to**

### **Epidemiology of a major honey bee pathogen, deformed wing virus: potential worldwide replacement of genotype A by genotype B**

Robert J. Paxton<sup>a,b</sup>, Marc O. Schäfer<sup>c</sup>, Francesco Nazzi<sup>d</sup>, Virginia Zanni<sup>d</sup>, Desiderato Annoscia<sup>d</sup>, Fabio Marroni<sup>d</sup>, Diane Bigot<sup>a</sup>, Eoin R. Laws-Quinn<sup>a</sup>, Delphine Panziera<sup>a</sup>, Christina Jenkins<sup>a</sup> and Hassan Shafiey<sup>a,b</sup>

This file contains:

Supplementary Figures S1-S3

Supplementary Tables S1-S5

## Supplementary Figures

**Supplementary Figure S1.** Location of seven sites (red dots) from which honey bees were sampled at flowers in 2017 on mainland UK; heatmap shows the prevalence of DWV-B in honey bees sampled at 26 sites in 2011, which included the seven sites resampled in 2017 (data from McMahon et al., 2016).

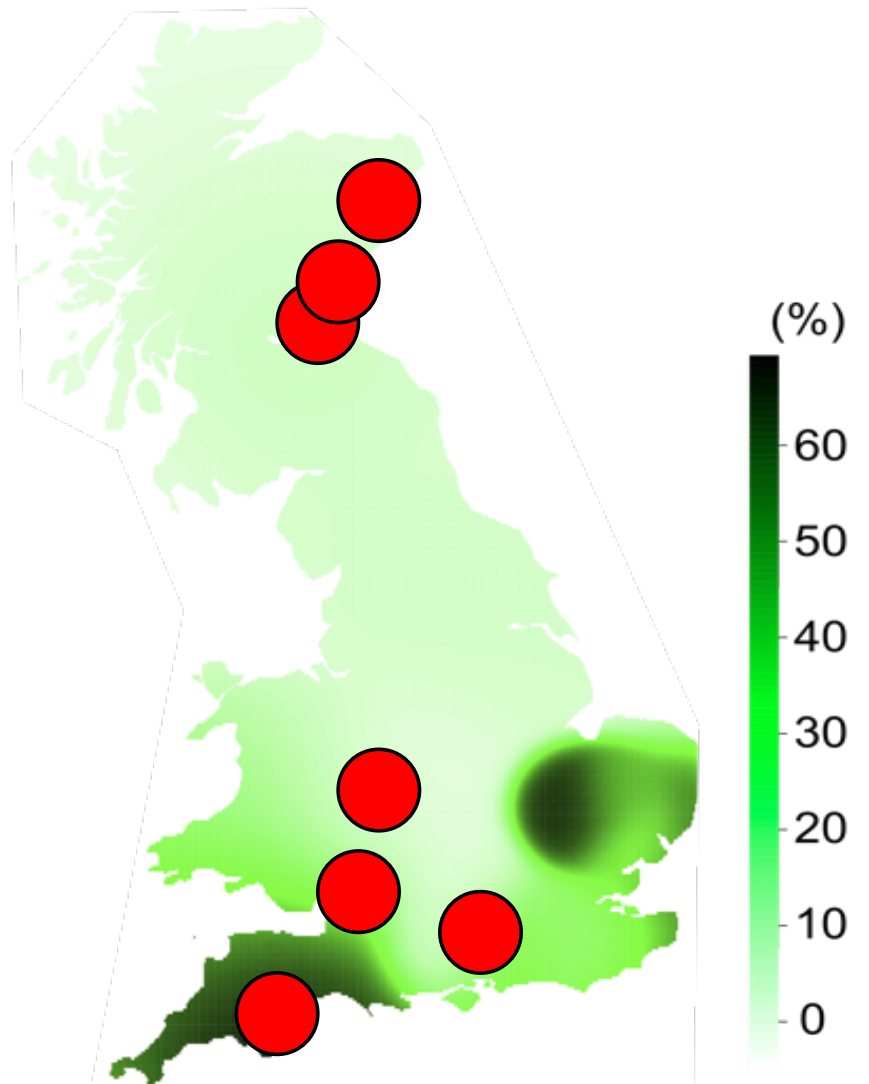

**Supplementary Figure S2.** Pile-up of NGS transcriptome reads of DWV from Italian honey bees collected in 2018 (see Supplementary Table S5). Three of the seven varroa-uninfested honey bees sampled in 2018 exhibited a recombinant genome with a DWV-A/DWV-B recombination point at the VP2 (capsid protein) encoding region (ca. 1800-1900). The same recombination pattern was observed in four varroa-uninfested and three mite infested honey bees collected in 2020. DWV isolated from honey bees collected from 2009 to 2013 did not show any recombinants between DWV-A and DWV-B.

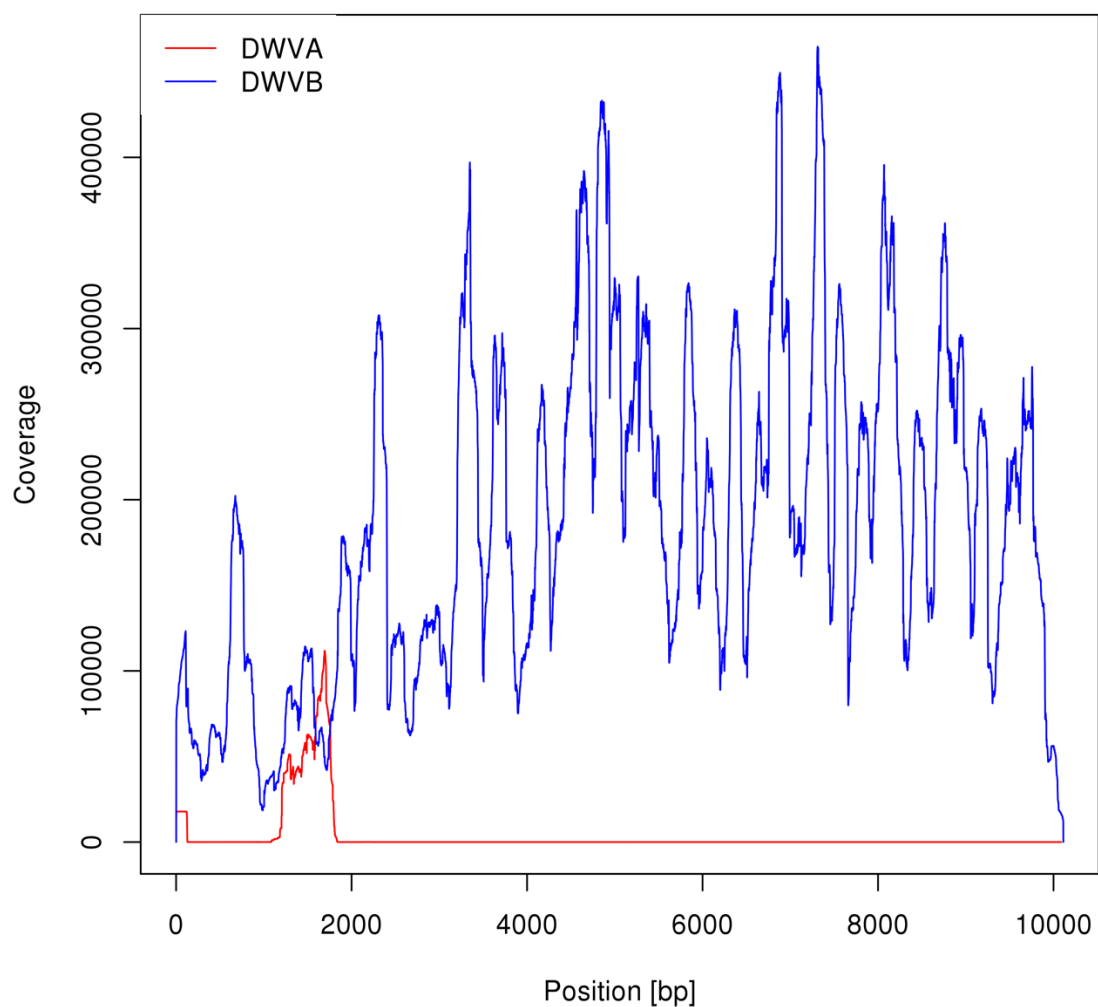

**Supplementary Figure S3.** Equilibrium frequencies of DWV-A (green dashed line) and DWV-B (blue dashed line) from our epidemiological model for a varying rate of fatality of colonies of status B and M ( $\nu_B = \nu_M$ ) when each genotype is under mutual inhibition ( $m_A = m_B = -0.1$ ). When colonies infected by DWV-B (status B and M) suffer very low mortality (fatality rates:  $\nu_B = \nu_M < \nu_A$ ), DWV-B rises to a high equilibrium frequency and DWV-A is eliminated from the population of honey bee colonies. As the mortality of colonies infected by DWV-B (status B and M) rises above a threshold of  $\nu_B = \nu_M = 0.083$ , DWV-B is lost from the population and DWV-A reaches high equilibrium frequency.

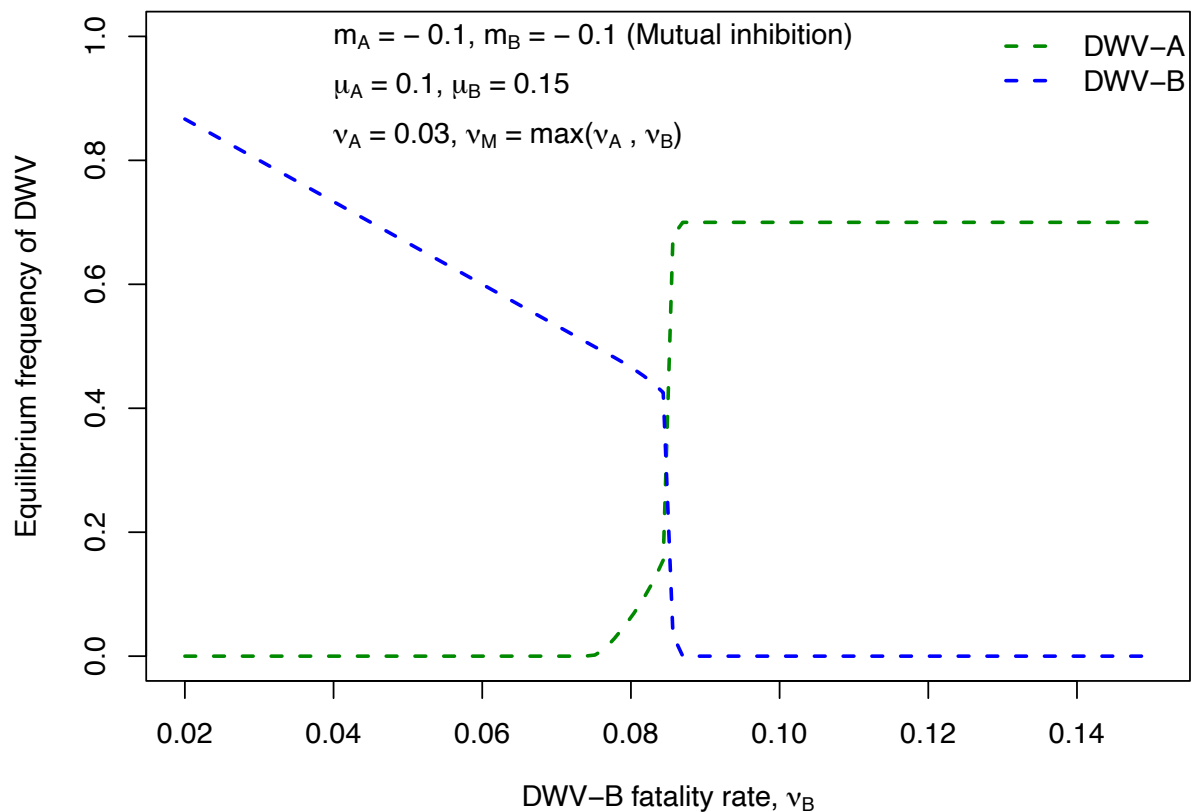

## Supplementary Tables

**Supplementary Table S1.** NGS RNAseq reads in NCBI's SRA through to the end of 2021 for *Apis mellifera*, *Varroa destructor* and *Bombus terrestris* that were mapped to DWV-A and DWV-B.

### Justification for read alignment settings.

Borrowing from the manuals to hisat2 and Bowtie2: the alignment scores in hisat2 and bowtie2 measure how genetically similar a read is to a reference. The score is calculated in a sophisticated way i.e. its value depends on the length of the read, the quality of bases in the read and the type of genetic change (mismatch vs indel). However, roughly speaking, hisat2, by default, returns reads with at least 95% genetic similarity (5 mismatches for a 100-nucleotide read). For Bowtie2, this number is about 90%. The mapping quality, on the other hand, measures the specificity with which a read can be mapped to a part of the genome. Mapping quality is defined as  $-10 \cdot \log(p)$  to the base of 10, where  $p$  is the probability that a read is mapped to the wrong place in the genome. A mapping quality of 10 and higher (as in our case) indicates at most 10% error in mapping position. Taking both alignment score and mapping quality, and considering that the genetic difference between DWV-A and B is ca. 17%, our read alignment settings allow us to detect DWV and to distinguish its two genotypes.

**Supplementary Table S2.** First records of DWV-B from a country or region in the literature, containing supplemental details to those provided in Table 3 of the manuscript.

**Supplementary Table S3.** Raw data on the prevalence of DWV-A and DWV-B at two time points in individual honey bees collected from flowers from seven sites in the UK.

**Supplementary Table S4.** Raw data on the prevalence of DWV-A and DWV-B at two time points in colonies of honey bees (one pool per colony) collected from collapsing colonies across Germany; years 2019 and 2020 were pooled for data presentation.

**Supplementary Table S5.** Raw data on the prevalence of DWV-A and DWV-B at two time points in NGS RNAseq reads of honey bees in Udine, NE Italy; data from years 2009-2013 and years 2018-2020 were each pooled for data presentation.

Table S1. NGS RNAseq reads in NCBI's SRA through to the end of 2021 for *Apis mellifera*, *Varroa destructor* and *Bombus terrestris* that were uniquely mapped to DWV-A and DWV-B.

| Bioproject  | lib         | host                  | layout     | RelDate | ColDate | EstColDate | country | region        | Total Reads | DWV-A   | Percent A | DWV-B | Percent B |
|-------------|-------------|-----------------------|------------|---------|---------|------------|---------|---------------|-------------|---------|-----------|-------|-----------|
| PRJDB5837   | DRR093876   | <i>Apis mellifera</i> | single end | 2019    | NA      | 2017       | Japan   | Asia          | 57129472    | 2568825 | 4.5       | 28833 | 0.05      |
| PRJDB5837   | DRR093877   | <i>Apis mellifera</i> | single end | 2019    | NA      | 2017       | Japan   | Asia          | 50627223    | 9740    | 0.02      | 123   | 0         |
| PRJDB5837   | DRR093878   | <i>Apis mellifera</i> | single end | 2019    | NA      | 2017       | Japan   | Asia          | 58762218    | 11231   | 0.02      | 129   | 0         |
| PRJDB5837   | DRR093879   | <i>Apis mellifera</i> | single end | 2019    | NA      | 2017       | Japan   | Asia          | 52660098    | 5741    | 0.01      | 74    | 0         |
| PRJDB5837   | DRR093880   | <i>Apis mellifera</i> | single end | 2019    | NA      | 2017       | Japan   | Asia          | 53625763    | 74495   | 0.14      | 683   | 0         |
| PRJDB5837   | DRR093881   | <i>Apis mellifera</i> | single end | 2019    | NA      | 2017       | Japan   | Asia          | 55993708    | 51510   | 0.09      | 418   | 0         |
| PRJDB6980   | DRR129201   | <i>Apis mellifera</i> | single end | 2018    | 2017    | 2017       | Japan   | Asia          | 857201      | 164     | 0.02      | 20    | 0         |
| PRJDB6980   | DRR129202   | <i>Apis mellifera</i> | single end | 2018    | 2017    | 2017       | Japan   | Asia          | 773045      | 12      | 0         | 0     | 0         |
| PRJDB6980   | DRR129203   | <i>Apis mellifera</i> | single end | 2018    | 2017    | 2017       | Japan   | Asia          | 751089      | 4       | 0         | 0     | 0         |
| PRJDB6980   | DRR129204   | <i>Apis mellifera</i> | single end | 2018    | 2017    | 2017       | Japan   | Asia          | 873506      | 0       | 0         | 0     | 0         |
| PRJDB6980   | DRR129205   | <i>Apis mellifera</i> | single end | 2018    | 2017    | 2017       | Japan   | Asia          | 1100788     | 0       | 0         | 0     | 0         |
| PRJDB6980   | DRR129206   | <i>Apis mellifera</i> | single end | 2018    | 2017    | 2017       | Japan   | Asia          | 1014845     | 4       | 0         | 0     | 0         |
| PRJDB6980   | DRR129207   | <i>Apis mellifera</i> | single end | 2018    | 2017    | 2017       | Japan   | Asia          | 1207299     | 0       | 0         | 0     | 0         |
| PRJDB6980   | DRR129208   | <i>Apis mellifera</i> | single end | 2018    | 2017    | 2017       | Japan   | Asia          | 772651      | 2       | 0         | 0     | 0         |
| PRJDB6980   | DRR129209   | <i>Apis mellifera</i> | single end | 2018    | 2017    | 2017       | Japan   | Asia          | 945803      | 7       | 0         | 0     | 0         |
| PRJDB6980   | DRR129210   | <i>Apis mellifera</i> | single end | 2018    | 2017    | 2017       | Japan   | Asia          | 937370      | 18      | 0         | 7     | 0         |
| PRJDB6980   | DRR129211   | <i>Apis mellifera</i> | single end | 2018    | 2017    | 2017       | Japan   | Asia          | 956121      | 6       | 0         | 0     | 0         |
| PRJDB6980   | DRR129212   | <i>Apis mellifera</i> | single end | 2018    | 2017    | 2017       | Japan   | Asia          | 993693      | 694     | 0.07      | 92    | 0.01      |
| PRJDB6980   | DRR129213   | <i>Apis mellifera</i> | single end | 2018    | 2017    | 2017       | Japan   | Asia          | 888771      | 99      | 0.01      | 4     | 0         |
| PRJDB6980   | DRR129214   | <i>Apis mellifera</i> | single end | 2018    | 2017    | 2017       | Japan   | Asia          | 1022733     | 247     | 0.02      | 22    | 0         |
| PRJDB6980   | DRR129215   | <i>Apis mellifera</i> | single end | 2018    | 2017    | 2017       | Japan   | Asia          | 943435      | 20      | 0         | 6     | 0         |
| PRJDB6980   | DRR129216   | <i>Apis mellifera</i> | single end | 2018    | 2017    | 2017       | Japan   | Asia          | 824672      | 34      | 0         | 5     | 0         |
| PRJDB6980   | DRR129217   | <i>Apis mellifera</i> | single end | 2018    | 2017    | 2017       | Japan   | Asia          | 951594      | 0       | 0         | 0     | 0         |
| PRJDB6980   | DRR129218   | <i>Apis mellifera</i> | single end | 2018    | 2017    | 2017       | Japan   | Asia          | 1128429     | 1       | 0         | 0     | 0         |
| PRJDB6980   | DRR129219   | <i>Apis mellifera</i> | single end | 2018    | 2017    | 2017       | Japan   | Asia          | 968535      | 0       | 0         | 0     | 0         |
| PRJDB6980   | DRR129220   | <i>Apis mellifera</i> | single end | 2018    | 2017    | 2017       | Japan   | Asia          | 805330      | 499095  | 61.97     | 21986 | 2.73      |
| PRJEB1945   | ERR274418   | <i>Apis mellifera</i> | single end | 2013    | NA      | 2011       | NA      | NA            | 41112761    | 502     | 0         | 421   | 0         |
| PRJEB1945   | ERR274419   | <i>Apis mellifera</i> | single end | 2013    | NA      | 2011       | NA      | NA            | 36895833    | 26772   | 0.07      | 27785 | 0.08      |
| PRJEB1945   | ERR274420   | <i>Apis mellifera</i> | single end | 2013    | NA      | 2011       | NA      | NA            | 18581971    | 57      | 0         | 33    | 0         |
| PRJEB1945   | ERR274421   | <i>Apis mellifera</i> | single end | 2013    | NA      | 2011       | NA      | NA            | 21706593    | 99      | 0         | 52    | 0         |
| PRJEB1945   | ERR274422   | <i>Apis mellifera</i> | single end | 2013    | NA      | 2011       | NA      | NA            | 41408380    | 635     | 0         | 515   | 0         |
| PRJEB1945   | ERR274423   | <i>Apis mellifera</i> | single end | 2013    | NA      | 2011       | NA      | NA            | 48206639    | 36003   | 0.07      | 37103 | 0.08      |
| PRJEB1945   | ERR274424   | <i>Apis mellifera</i> | single end | 2013    | NA      | 2011       | NA      | NA            | 15071975    | 105     | 0         | 38    | 0         |
| PRJNA122153 | SRR042523   | <i>Apis mellifera</i> | single end | 2010    | NA      | 2008       | NA      | NA            | 9027681     | 23      | 0         | 0     | 0         |
| PRJNA562696 | SRR10030209 | <i>Apis mellifera</i> | single end | 2019    | 2014    | 2014       | USA     | North America | 32614630    | 1       | 0         | 0     | 0         |
| PRJNA562696 | SRR10030210 | <i>Apis mellifera</i> | single end | 2019    | 2014    | 2014       | USA     | North America | 29713036    | 0       | 0         | 0     | 0         |
| PRJNA562696 | SRR10030211 | <i>Apis mellifera</i> | single end | 2019    | 2014    | 2014       | USA     | North America | 34634718    | 34      | 0         | 0     | 0         |
| PRJNA562696 | SRR10030212 | <i>Apis mellifera</i> | single end | 2019    | 2014    | 2014       | USA     | North America | 31649640    | 7       | 0         | 0     | 0         |
| PRJNA562696 | SRR10030213 | <i>Apis mellifera</i> | single end | 2019    | 2014    | 2014       | USA     | North America | 23825381    | 1       | 0         | 0     | 0         |
| PRJNA562696 | SRR10030214 | <i>Apis mellifera</i> | single end | 2019    | 2014    | 2014       | USA     | North America | 31647319    | 1       | 0         | 0     | 0         |
| PRJNA562696 | SRR10030215 | <i>Apis mellifera</i> | single end | 2019    | 2014    | 2014       | USA     | North America | 33440508    | 2       | 0         | 0     | 0         |
| PRJNA562696 | SRR10030216 | <i>Apis mellifera</i> | single end | 2019    | 2014    | 2014       | USA     | North America | 30176365    | 10      | 0         | 0     | 0         |
| PRJNA562696 | SRR10030217 | <i>Apis mellifera</i> | single end | 2019    | 2014    | 2014       | USA     | North America | 32969244    | 4       | 0         | 0     | 0         |
| PRJNA562696 | SRR10030218 | <i>Apis mellifera</i> | single end | 2019    | 2014    | 2014       | USA     | North America | 36437471    | 3       | 0         | 0     | 0         |
| PRJNA562696 | SRR10030219 | <i>Apis mellifera</i> | single end | 2019    | 2014    | 2014       | USA     | North America | 33168309    | 12      | 0         | 0     | 0         |
| PRJNA562696 | SRR10030220 | <i>Apis mellifera</i> | single end | 2019    | 2014    | 2014       | USA     | North America | 31004697    | 7       | 0         | 0     | 0         |
| PRJNA562696 | SRR10030221 | <i>Apis mellifera</i> | single end | 2019    | 2014    | 2014       | USA     | North America | 28700071    | 1       | 0         | 0     | 0         |
| PRJNA562696 | SRR10030222 | <i>Apis mellifera</i> | single end | 2019    | 2014    | 2014       | USA     | North America | 33115693    | 1       | 0         | 0     | 0         |
| PRJNA562696 | SRR10030223 | <i>Apis mellifera</i> | single end | 2019    | 2014    | 2014       | USA     | North America | 36005390    | 0       | 0         | 0     | 0         |
| PRJNA562696 | SRR10030224 | <i>Apis mellifera</i> | single end | 2019    | 2014    | 2014       | USA     | North America | 30120743    | 1       | 0         | 0     | 0         |
| PRJNA562696 | SRR10030225 | <i>Apis mellifera</i> | single end | 2019    | 2014    | 2014       | USA     | North America | 36298267    | 29      | 0         | 0     | 0         |
| PRJNA562696 | SRR10030226 | <i>Apis mellifera</i> | single end | 2019    | 2014    | 2014       | USA     | North America | 26587078    | 0       | 0         | 0     | 0         |
| PRJNA562696 | SRR10030227 | <i>Apis mellifera</i> | single end | 2019    | 2014    | 2014       | USA     | North America | 37707929    | 0       | 0         | 0     | 0         |
| PRJNA562696 | SRR10030228 | <i>Apis mellifera</i> | single end | 2019    | 2014    | 2014       | USA     | North America | 30246822    | 8       | 0         | 0     | 0         |
| PRJNA562696 | SRR10030229 | <i>Apis mellifera</i> | single end | 2019    | 2014    | 2014       | USA     | North America | 33794604    | 1       | 0         | 0     | 0         |
| PRJNA562696 | SRR10030230 | <i>Apis mellifera</i> | single end | 2019    | 2014    | 2014       | USA     | North America | 29240999    | 0       | 0         | 0     | 0         |
| PRJNA562696 | SRR10030231 | <i>Apis mellifera</i> | single end | 2019    | 2014    | 2014       | USA     | North America | 39154997    | 10      | 0         | 0     | 0         |
| PRJNA562696 | SRR10030232 | <i>Apis mellifera</i> | single end | 2019    | 2014    | 2014       | USA     | North America | 27007871    | 1       | 0         | 0     | 0         |
| PRJNA562696 | SRR10030233 | <i>Apis mellifera</i> | single end | 2019    | 2014    | 2014       | USA     | North America | 31499016    | 0       | 0         | 0     | 0         |
| PRJNA562696 | SRR10030234 | <i>Apis mellifera</i> | single end | 2019    | 2014    | 2014       | USA     | North America | 25110163    | 129     | 0         | 0     | 0         |
| PRJNA562696 | SRR10030235 | <i>Apis mellifera</i> | single end | 2019    | 2014    | 2014       | USA     | North America | 32193740    | 4       | 0         | 3     | 0         |
| PRJNA562696 | SRR10030236 | <i>Apis mellifera</i> | single end | 2019    | 2014    | 2014       | USA     | North America | 29796432    | 40      | 0         | 0     | 0         |
| PRJNA562696 | SRR10030237 | <i>Apis mellifera</i> | single end | 2019    | 2014    | 2014       | USA     | North America | 32160988    | 0       | 0         | 0     | 0         |
| PRJNA562696 | SRR10030238 | <i>Apis mellifera</i> | single end | 2019    | 2014    | 2014       | USA     | North America | 28965239    | 60      | 0         | 0     | 0         |
| PRJNA562696 | SRR10030239 | <i>Apis mellifera</i> | single end | 2019    | 2014    | 2014       | USA     | North America | 28875400    | 5       | 0         | 0     | 0         |
| PRJNA562696 | SRR10030240 | <i>Apis mellifera</i> | single end | 2019    | 2014    | 2014       | USA     | North America | 34664847    | 0       | 0         | 0     | 0         |
| PRJNA562696 | SRR10030241 | <i>Apis mellifera</i> | single end | 2019    | 2014    | 2014       | USA     | North America | 35673668    | 183     | 0         | 2     | 0         |
| PRJNA562696 | SRR10030242 | <i>Apis mellifera</i> | single end | 2019    | 2014    | 2014       | USA     | North America | 35212384    | 50      | 0         | 0     | 0         |
| PRJNA562696 | SRR10030243 | <i>Apis mellifera</i> | single end | 2019    | 2014    | 2014       | USA     | North America | 30175324    | 3       | 0         | 0     | 0         |
| PRJNA562696 | SRR10030244 | <i>Apis mellifera</i> | single end | 2019    | 2014    | 2014       | USA     | North America | 25108157    | 10      | 0         | 0     | 0         |
| PRJNA562696 | SRR10030245 | <i>Apis mellifera</i> | single end | 2019    | 2014    | 2014       | USA     | North America | 29543474    | 23      | 0         | 1     | 0         |
| PRJNA562696 | SRR10030246 | <i>Apis mellifera</i> | single end | 2019    | 2014    | 2014       | USA     | North America | 28064601    | 0       | 0         | 0     | 0         |
| PRJNA562696 | SRR10030247 | <i>Apis mellifera</i> | single end | 2019    | 2014    | 2014       | USA     | North America | 23675284    | 6683    | 0.03      | 38    | 0         |
| PRJNA562696 | SRR10030248 | <i>Apis mellifera</i> | single end | 2019    | 2014    | 2014       | USA     | North America | 30189225    | 21      | 0         | 0     | 0         |
| PRJNA562696 | SRR10030249 | <i>Apis mellifera</i> | single end | 2019    | 2014    | 2014       | USA     | North America | 30774849    | 0       | 0         | 0     | 0         |
| PRJNA562696 | SRR10030250 | <i>Apis mellifera</i> | single end | 2019    | 2014    | 2014       | USA     | North America | 28234128    | 80      | 0         | 1     | 0         |
| PRJNA562696 | SRR10030251 | <i>Apis mellifera</i> | single end | 2019    | 2014    | 2014       | USA     | North America | 31756578    | 3       | 0         | 0     | 0         |
| PRJNA562696 | SRR10030252 | <i>Apis mellifera</i> | single end | 2019    | 2014    | 2014       | USA     | North America | 31415328    | 0       | 0         | 0     | 0         |
| PRJNA562696 | SRR10030253 | <i>Apis mellifera</i> | single end | 2019    | 2014    | 2014       | USA     | North America | 28804355    | 3       | 0         | 0     | 0         |
| PRJNA562696 | SRR10030254 | <i>Apis mellifera</i> | single end | 2019    | 2014    | 2014       | USA     | North America | 30910002    | 4       | 0         | 0     | 0         |
| PRJNA562696 | SRR10030255 | <i>Apis mellifera</i> | single end | 2019    | 2014    | 2014       | USA     | North America | 28403726    | 5       | 0         | 0     | 0         |
| PRJNA562696 | SRR10030256 | <i>Apis mellifera</i> | single end | 2019    | 2014    | 2014       | USA     | North America | 31536486    | 2       | 0         | 0     | 0         |
| PRJNA562696 | SRR10030257 | <i>Apis mellifera</i> | single end | 2019    | 2014    | 2014       | USA     | North America | 30427068    | 0       | 0         | 1     | 0         |
| PRJNA562696 | SRR10030258 | <i>Apis mellifera</i> | single end | 2019    | 2014    | 2014       | USA     | North America | 30082199    | 11      | 0         | 0     | 0         |
| PRJNA562696 | SRR10030259 | <i>Apis mellifera</i> | single end | 2019    | 2014    | 2014       | USA     | North America | 30126353    | 1       | 0         | 0     | 0         |
| PRJNA562696 | SRR10030260 | <i>Apis mellifera</i> | single end | 2019    | 2014    | 2014       | USA     | North America | 33933530    | 0       | 0         | 0     | 0         |
| PRJNA562696 | SRR10030261 | <i>Apis mellifera</i> | single end | 2019    | 2014    | 2014       | USA     | North America | 31588132    | 5       | 0         | 0     | 0         |
| PRJNA562696 | SRR10030262 | <i>Apis mellifera</i> | single end | 2019    | 2014    | 2014       | USA     | North America | 33358022    | 1       | 0         | 0     | 0         |
| PRJNA562696 | SRR10030263 | <i>Apis mellifera</i> | single end | 2019    | 2014    | 2014       | USA     | North America | 29822880    | 1       | 0         | 0     | 0         |
| PRJNA562696 | SRR10030264 | <i>Apis mellifera</i> | single end | 2019    | 2014    | 2014       | USA     | North America | 31820211    | 14      | 0         | 0     | 0         |
| PRJNA562696 | SRR10030265 | <i>Apis mellifera</i> | single end | 2019    | 2014    | 2014       | USA     | North America | 29733517    | 2       | 0         | 0     | 0         |
| PRJNA562696 | SRR10030266 | <i>Apis mellifera</i> | single end | 2019    | 2014    | 2014       | USA     | North America | 32521540    | 0       | 0         | 0     | 0         |
| PRJNA562696 | SRR10030267 | <i>Apis mellifera</i> | single end | 2019    | 2014    | 2014       | USA     | North America | 30823787    | 20      | 0         | 0     | 0         |
| PRJNA562696 | SRR10030268 | <i>Apis mellifera</i> | single end |         |         |            |         |               |             |         |           |       |           |

|             |             |                |            |      |      |      |       |               |          |          |       |      |      |
|-------------|-------------|----------------|------------|------|------|------|-------|---------------|----------|----------|-------|------|------|
| PRJNA562696 | SRR10030279 | Apis mellifera | single end | 2019 | 2014 | 2014 | USA   | North America | 27724574 | 0        | 0     | 0    | 0    |
| PRJNA562696 | SRR10030280 | Apis mellifera | single end | 2019 | 2014 | 2014 | USA   | North America | 31111929 | 1        | 0     | 0    | 0    |
| PRJNA227348 | SRR1028781  | Apis mellifera | single end | 2015 | NA   | 2013 | NA    | NA            | 7344483  | 0        | 0     | 0    | 0    |
| PRJNA227348 | SRR1028782  | Apis mellifera | single end | 2015 | NA   | 2013 | NA    | NA            | 6968503  | 0        | 0     | 0    | 0    |
| PRJNA227348 | SRR1028783  | Apis mellifera | single end | 2015 | NA   | 2013 | NA    | NA            | 7326580  | 0        | 0     | 0    | 0    |
| PRJNA227348 | SRR1028784  | Apis mellifera | single end | 2015 | NA   | 2013 | NA    | NA            | 7371304  | 0        | 0     | 0    | 0    |
| PRJNA579390 | SRR10343221 | Apis mellifera | single end | 2020 | NA   | 2018 | NA    | NA            | 33454166 | 0        | 0     | 0    | 0    |
| PRJNA579390 | SRR10343222 | Apis mellifera | single end | 2020 | NA   | 2018 | NA    | NA            | 33454166 | 0        | 0     | 0    | 0    |
| PRJNA579390 | SRR10343223 | Apis mellifera | single end | 2020 | NA   | 2018 | NA    | NA            | 36223497 | 6        | 0     | 0    | 0    |
| PRJNA579390 | SRR10343224 | Apis mellifera | single end | 2020 | NA   | 2018 | NA    | NA            | 36223497 | 6        | 0     | 0    | 0    |
| PRJNA579390 | SRR10343225 | Apis mellifera | single end | 2020 | NA   | 2018 | NA    | NA            | 34378792 | 15       | 0     | 2    | 0    |
| PRJNA579390 | SRR10343226 | Apis mellifera | single end | 2020 | NA   | 2018 | NA    | NA            | 34378792 | 16       | 0     | 2    | 0    |
| PRJNA579390 | SRR10343227 | Apis mellifera | single end | 2020 | NA   | 2018 | NA    | NA            | 32150794 | 8        | 0     | 0    | 0    |
| PRJNA579390 | SRR10343228 | Apis mellifera | single end | 2020 | NA   | 2018 | NA    | NA            | 32150794 | 8        | 0     | 0    | 0    |
| PRJNA579390 | SRR10343229 | Apis mellifera | single end | 2020 | NA   | 2018 | NA    | NA            | 33277891 | 31       | 0     | 0    | 0    |
| PRJNA579390 | SRR10343230 | Apis mellifera | single end | 2020 | NA   | 2018 | NA    | NA            | 33277891 | 30       | 0     | 0    | 0    |
| PRJNA579390 | SRR10343231 | Apis mellifera | single end | 2020 | NA   | 2018 | NA    | NA            | 33648919 | 5        | 0     | 0    | 0    |
| PRJNA579390 | SRR10343232 | Apis mellifera | single end | 2020 | NA   | 2018 | NA    | NA            | 33648919 | 5        | 0     | 0    | 0    |
| PRJNA229500 | SRR1035614  | Apis mellifera | single end | 2015 | NA   | 2013 | NA    | NA            | 11405509 | 0        | 0     | 0    | 0    |
| PRJNA229500 | SRR1035615  | Apis mellifera | single end | 2015 | NA   | 2013 | NA    | NA            | 10618686 | 4        | 0     | 0    | 0    |
| PRJNA228948 | SRR1036397  | Apis mellifera | single end | 2015 | 2012 | 2012 | China | Asia          | 18038916 | 0        | 0     | 0    | 0    |
| PRJNA228948 | SRR1036398  | Apis mellifera | single end | 2015 | 2012 | 2012 | China | Asia          | 12000000 | 0        | 0     | 0    | 0    |
| PRJNA228948 | SRR1036399  | Apis mellifera | single end | 2015 | 2012 | 2012 | China | Asia          | 12000000 | 0        | 0     | 0    | 0    |
| PRJNA593999 | SRR10598578 | Apis mellifera | single end | 2020 | 2016 | 2016 | USA   | North America | 32352831 | 8        | 0     | 0    | 0    |
| PRJNA593999 | SRR10598589 | Apis mellifera | single end | 2020 | 2016 | 2016 | USA   | North America | 31429725 | 2        | 0     | 0    | 0    |
| PRJNA593999 | SRR10598600 | Apis mellifera | single end | 2020 | 2016 | 2016 | USA   | North America | 31670305 | 26       | 0     | 0    | 0    |
| PRJNA593999 | SRR10598611 | Apis mellifera | single end | 2020 | 2016 | 2016 | USA   | North America | 38222182 | 16       | 0     | 0    | 0    |
| PRJNA593999 | SRR10598622 | Apis mellifera | single end | 2020 | 2016 | 2016 | USA   | North America | 31418775 | 79       | 0     | 0    | 0    |
| PRJNA593999 | SRR10598628 | Apis mellifera | single end | 2020 | 2016 | 2016 | USA   | North America | 39411076 | 1        | 0     | 0    | 0    |
| PRJNA593999 | SRR10598629 | Apis mellifera | single end | 2020 | 2016 | 2016 | USA   | North America | 31352405 | 0        | 0     | 0    | 0    |
| PRJNA593999 | SRR10598630 | Apis mellifera | single end | 2020 | 2016 | 2016 | USA   | North America | 35428104 | 1        | 0     | 0    | 0    |
| PRJNA593999 | SRR10598631 | Apis mellifera | single end | 2020 | 2016 | 2016 | USA   | North America | 33780723 | 0        | 0     | 0    | 0    |
| PRJNA593999 | SRR10598632 | Apis mellifera | single end | 2020 | 2016 | 2016 | USA   | North America | 27917610 | 1        | 0     | 0    | 0    |
| PRJNA593999 | SRR10598633 | Apis mellifera | single end | 2020 | 2016 | 2016 | USA   | North America | 34929511 | 40       | 0     | 0    | 0    |
| PRJNA593999 | SRR10598634 | Apis mellifera | single end | 2020 | 2016 | 2016 | USA   | North America | 29170272 | 1        | 0     | 0    | 0    |
| PRJNA593999 | SRR10598635 | Apis mellifera | single end | 2020 | 2016 | 2016 | USA   | North America | 34755595 | 1        | 0     | 0    | 0    |
| PRJNA593999 | SRR10598636 | Apis mellifera | single end | 2020 | 2016 | 2016 | USA   | North America | 34926669 | 0        | 0     | 1    | 0    |
| PRJNA593999 | SRR10598637 | Apis mellifera | single end | 2020 | 2016 | 2016 | USA   | North America | 32913814 | 1        | 0     | 0    | 0    |
| PRJNA593999 | SRR10598638 | Apis mellifera | single end | 2020 | 2016 | 2016 | USA   | North America | 36882580 | 1        | 0     | 0    | 0    |
| PRJNA593999 | SRR10598639 | Apis mellifera | single end | 2020 | 2016 | 2016 | USA   | North America | 32286134 | 0        | 0     | 0    | 0    |
| PRJNA593999 | SRR10598640 | Apis mellifera | single end | 2020 | 2016 | 2016 | USA   | North America | 34584539 | 3        | 0     | 0    | 0    |
| PRJNA593999 | SRR10598641 | Apis mellifera | single end | 2020 | 2016 | 2016 | USA   | North America | 30171589 | 0        | 0     | 0    | 0    |
| PRJNA593999 | SRR10598642 | Apis mellifera | single end | 2020 | 2016 | 2016 | USA   | North America | 37144651 | 11       | 0     | 1    | 0    |
| PRJNA593999 | SRR10598643 | Apis mellifera | single end | 2020 | 2016 | 2016 | USA   | North America | 30935496 | 2        | 0     | 1    | 0    |
| PRJNA593999 | SRR10598644 | Apis mellifera | single end | 2020 | 2016 | 2016 | USA   | North America | 29457655 | 0        | 0     | 0    | 0    |
| PRJNA593999 | SRR10598645 | Apis mellifera | single end | 2020 | 2016 | 2016 | USA   | North America | 31266511 | 1        | 0     | 0    | 0    |
| PRJNA593999 | SRR10598646 | Apis mellifera | single end | 2020 | 2016 | 2016 | USA   | North America | 29556176 | 0        | 0     | 0    | 0    |
| PRJNA593999 | SRR10598647 | Apis mellifera | single end | 2020 | 2016 | 2016 | USA   | North America | 39494637 | 1        | 0     | 0    | 0    |
| PRJNA593999 | SRR10598648 | Apis mellifera | single end | 2020 | 2016 | 2016 | USA   | North America | 32190009 | 0        | 0     | 0    | 0    |
| PRJNA593999 | SRR10598649 | Apis mellifera | single end | 2020 | 2016 | 2016 | USA   | North America | 29664697 | 7        | 0     | 0    | 0    |
| PRJNA593999 | SRR10598650 | Apis mellifera | single end | 2020 | 2016 | 2016 | USA   | North America | 31500589 | 0        | 0     | 0    | 0    |
| PRJNA593999 | SRR10598651 | Apis mellifera | single end | 2020 | 2016 | 2016 | USA   | North America | 33029606 | 2        | 0     | 0    | 0    |
| PRJNA593999 | SRR10598652 | Apis mellifera | single end | 2020 | 2016 | 2016 | USA   | North America | 30789203 | 0        | 0     | 0    | 0    |
| PRJNA593999 | SRR10598653 | Apis mellifera | single end | 2020 | 2016 | 2016 | USA   | North America | 33190502 | 0        | 0     | 1    | 0    |
| PRJNA593999 | SRR10598654 | Apis mellifera | single end | 2020 | 2016 | 2016 | USA   | North America | 33552368 | 3        | 0     | 0    | 0    |
| PRJNA593999 | SRR10598655 | Apis mellifera | single end | 2020 | 2016 | 2016 | USA   | North America | 29589656 | 6        | 0     | 0    | 0    |
| PRJNA593999 | SRR10598656 | Apis mellifera | single end | 2020 | 2016 | 2016 | USA   | North America | 34310005 | 0        | 0     | 0    | 0    |
| PRJNA593999 | SRR10598657 | Apis mellifera | single end | 2020 | 2016 | 2016 | USA   | North America | 35673640 | 0        | 0     | 0    | 0    |
| PRJNA593999 | SRR10598658 | Apis mellifera | single end | 2020 | 2016 | 2016 | USA   | North America | 37476319 | 0        | 0     | 0    | 0    |
| PRJNA593999 | SRR10598659 | Apis mellifera | single end | 2020 | 2016 | 2016 | USA   | North America | 37813209 | 0        | 0     | 0    | 0    |
| PRJNA593999 | SRR10598660 | Apis mellifera | single end | 2020 | 2016 | 2016 | USA   | North America | 44269153 | 11       | 0     | 0    | 0    |
| PRJNA593999 | SRR10598661 | Apis mellifera | single end | 2020 | 2016 | 2016 | USA   | North America | 34438409 | 29       | 0     | 0    | 0    |
| PRJNA593999 | SRR10598662 | Apis mellifera | single end | 2020 | 2016 | 2016 | USA   | North America | 30983454 | 1        | 0     | 0    | 0    |
| PRJNA593999 | SRR10598663 | Apis mellifera | single end | 2020 | 2016 | 2016 | USA   | North America | 27452046 | 57       | 0     | 0    | 0    |
| PRJNA593999 | SRR10598664 | Apis mellifera | single end | 2020 | 2016 | 2016 | USA   | North America | 28952717 | 67       | 0     | 0    | 0    |
| PRJNA593999 | SRR10598665 | Apis mellifera | single end | 2020 | 2016 | 2016 | USA   | North America | 31498346 | 44       | 0     | 0    | 0    |
| PRJNA593999 | SRR10598666 | Apis mellifera | single end | 2020 | 2016 | 2016 | USA   | North America | 30234588 | 1        | 0     | 0    | 0    |
| PRJNA593999 | SRR10598667 | Apis mellifera | single end | 2020 | 2016 | 2016 | USA   | North America | 29582894 | 7        | 0     | 0    | 0    |
| PRJNA594208 | SRR10606709 | Apis mellifera | single end | 2020 | NA   | 2018 | NA    | NA            | 25971713 | 1        | 0     | 0    | 0    |
| PRJNA599219 | SRR10836842 | Apis mellifera | single end | 2020 | NA   | 2018 | NA    | NA            | 11090069 | 0        | 0     | 0    | 0    |
| PRJNA599219 | SRR10836843 | Apis mellifera | single end | 2020 | NA   | 2018 | NA    | NA            | 8856370  | 0        | 0     | 0    | 0    |
| PRJNA599219 | SRR10836844 | Apis mellifera | single end | 2020 | NA   | 2018 | NA    | NA            | 9937948  | 0        | 0     | 0    | 0    |
| PRJNA599219 | SRR10836845 | Apis mellifera | single end | 2020 | NA   | 2018 | NA    | NA            | 11301110 | 0        | 0     | 0    | 0    |
| PRJNA599219 | SRR10836846 | Apis mellifera | single end | 2020 | NA   | 2018 | NA    | NA            | 9483685  | 0        | 0     | 0    | 0    |
| PRJNA599219 | SRR10836847 | Apis mellifera | single end | 2020 | NA   | 2018 | NA    | NA            | 9762272  | 0        | 0     | 0    | 0    |
| PRJNA599219 | SRR10836848 | Apis mellifera | single end | 2020 | NA   | 2018 | NA    | NA            | 9380950  | 0        | 0     | 0    | 0    |
| PRJNA599219 | SRR10836849 | Apis mellifera | single end | 2020 | NA   | 2018 | NA    | NA            | 9583287  | 0        | 0     | 0    | 0    |
| PRJNA599219 | SRR10836850 | Apis mellifera | single end | 2020 | NA   | 2018 | NA    | NA            | 9705893  | 0        | 0     | 0    | 0    |
| PRJNA599219 | SRR10836851 | Apis mellifera | single end | 2020 | NA   | 2018 | NA    | NA            | 8486899  | 0        | 0     | 0    | 0    |
| PRJNA599219 | SRR10836852 | Apis mellifera | single end | 2020 | NA   | 2018 | NA    | NA            | 26423213 | 0        | 0     | 0    | 0    |
| PRJNA599219 | SRR10836853 | Apis mellifera | single end | 2020 | NA   | 2018 | NA    | NA            | 11761823 | 0        | 0     | 0    | 0    |
| PRJNA599219 | SRR10836854 | Apis mellifera | single end | 2020 | NA   | 2018 | NA    | NA            | 8827719  | 0        | 0     | 0    | 0    |
| PRJNA599219 | SRR10836855 | Apis mellifera | single end | 2020 | NA   | 2018 | NA    | NA            | 10812212 | 0        | 0     | 0    | 0    |
| PRJNA607066 | SRR11096262 | Apis mellifera | single end | 2020 | NA   | 2018 | USA   | North America | 31331290 | 10055532 | 32.09 | 2324 | 0.01 |
| PRJNA607066 | SRR11096263 | Apis mellifera | single end | 2020 | NA   | 2018 | USA   | North America | 33802741 | 7530234  | 22.28 | 1627 | 0    |
| PRJNA607066 | SRR11096264 | Apis mellifera | single end | 2020 | NA   | 2018 | USA   | North America | 29310031 | 34062    | 0.12  | 105  | 0    |
| PRJNA607066 | SRR11096265 | Apis mellifera | single end | 2020 | NA   | 2018 | USA   | North America | 31202159 | 45667    | 0.15  | 101  | 0    |
| PRJNA607066 | SRR11096266 | Apis mellifera | single end | 2020 | NA   | 2018 | USA   | North America | 31311515 | 38411    | 0.12  | 101  | 0    |
| PRJNA607066 | SRR11096267 | Apis mellifera | single end | 2020 | NA   | 2018 | USA   | North America | 25318759 | 3587056  | 14.17 | 507  | 0    |
| PRJNA607066 | SRR11096268 | Apis mellifera | single end | 2020 | NA   | 2018 | USA   | North America | 28370097 | 5326275  | 18.77 | 701  | 0    |
| PRJNA607066 | SRR11096269 | Apis mellifera | single end | 2020 | NA   | 2018 | USA   | North America | 23929953 | 7342089  | 30.68 | 1254 | 0.01 |
| PRJNA607066 | SRR11096270 | Apis mellifera | single end | 2020 | NA   | 2018 | USA   | North America | 30476652 | 7558083  | 24.8  | 1629 | 0.01 |
| PRJNA607066 | SRR11096271 | Apis mellifera | single end | 2020 | NA   | 2018 | USA   | North America | 31398202 | 8917085  | 28.4  | 1841 | 0.01 |
| PRJNA607066 | SRR11096272 | Apis mellifera | single end | 2020 | NA   | 2018 | USA   | North America | 41907494 | 10668879 | 25.46 | 2197 | 0.01 |
| PRJNA607066 | SRR11096273 | Apis mellifera | single end | 2020 | NA   | 2018 | USA   | North America | 29162295 | 8839992  | 30.31 | 1515 | 0.01 |
| PRJNA607066 | SRR11096274 | Apis mellifera | single end | 2020 | NA   | 2018 | USA   | North America | 31250407 | 9531648  | 30.5  | 7491 | 0.02 |
| PRJNA607066 | SRR11096275 | Apis mellifera | single end | 2020 | NA   | 2018 | USA   | North America | 37543684 | 11011751 | 29.33 | 1923 | 0.01 |
| PRJNA607066 | SRR11096276 | Apis mellifera | single end | 2020 | NA   | 2018 | USA   | North America |          |          |       |      |      |

|             |             |                |            |      |      |      |        |               |          |          |       |       |      |
|-------------|-------------|----------------|------------|------|------|------|--------|---------------|----------|----------|-------|-------|------|
| PRJNA607066 | SRR11096284 | Apis mellifera | single end | 2020 | NA   | 2018 | USA    | North America | 31935561 | 58363    | 0.18  | 139   | 0    |
| PRJNA607066 | SRR11096285 | Apis mellifera | single end | 2020 | NA   | 2018 | USA    | North America | 28524988 | 15876275 | 55.66 | 2526  | 0.01 |
| PRJNA607066 | SRR11096286 | Apis mellifera | single end | 2020 | NA   | 2018 | USA    | North America | 37137899 | 19544648 | 52.63 | 3136  | 0.01 |
| PRJNA607066 | SRR11096287 | Apis mellifera | single end | 2020 | NA   | 2018 | USA    | North America | 39450826 | 23128260 | 58.63 | 3709  | 0.01 |
| PRJNA607066 | SRR11096288 | Apis mellifera | single end | 2020 | NA   | 2018 | USA    | North America | 49107805 | 23739989 | 48.34 | 4959  | 0.01 |
| PRJNA607066 | SRR11096289 | Apis mellifera | single end | 2020 | NA   | 2018 | USA    | North America | 26294610 | 13993944 | 53.22 | 10860 | 0.04 |
| PRJNA607066 | SRR11096290 | Apis mellifera | single end | 2020 | NA   | 2018 | USA    | North America | 22727980 | 16255431 | 71.52 | 1939  | 0.01 |
| PRJNA607066 | SRR11096291 | Apis mellifera | single end | 2020 | NA   | 2018 | USA    | North America | 27066957 | 14310094 | 52.87 | 2315  | 0.01 |
| PRJNA607066 | SRR11096292 | Apis mellifera | single end | 2020 | NA   | 2018 | USA    | North America | 33949001 | 21661095 | 63.8  | 19732 | 0.06 |
| PRJNA607066 | SRR11096293 | Apis mellifera | single end | 2020 | NA   | 2018 | USA    | North America | 41659417 | 24284051 | 58.29 | 4341  | 0.01 |
| PRJNA607066 | SRR11096294 | Apis mellifera | single end | 2020 | NA   | 2018 | USA    | North America | 39860922 | 24365030 | 61.13 | 4182  | 0.01 |
| PRJNA607066 | SRR11096295 | Apis mellifera | single end | 2020 | NA   | 2018 | USA    | North America | 29992766 | 18615771 | 62.07 | 2509  | 0.01 |
| PRJNA607066 | SRR11096296 | Apis mellifera | single end | 2020 | NA   | 2018 | USA    | North America | 34498511 | 17155098 | 49.73 | 2433  | 0.01 |
| PRJNA607066 | SRR11096297 | Apis mellifera | single end | 2020 | NA   | 2018 | USA    | North America | 27050635 | 15170089 | 56.08 | 2112  | 0.01 |
| PRJNA607066 | SRR11096298 | Apis mellifera | single end | 2020 | NA   | 2018 | USA    | North America | 28676148 | 19754737 | 68.89 | 3389  | 0.01 |
| PRJNA607066 | SRR11096299 | Apis mellifera | single end | 2020 | NA   | 2018 | USA    | North America | 28211893 | 15789650 | 55.97 | 1911  | 0.01 |
| PRJNA616244 | SRR11447325 | Apis mellifera | single end | 2020 | NA   | 2018 | NA     | NA            | 53240318 | 1        | 0     | 27    | 0    |
| PRJNA616244 | SRR11447326 | Apis mellifera | single end | 2020 | NA   | 2018 | NA     | NA            | 49588827 | 0        | 0     | 0     | 0    |
| PRJNA616244 | SRR11447327 | Apis mellifera | single end | 2020 | NA   | 2018 | NA     | NA            | 50572593 | 0        | 0     | 17    | 0    |
| PRJNA616244 | SRR11447328 | Apis mellifera | single end | 2020 | NA   | 2018 | NA     | NA            | 43635753 | 4        | 0     | 212   | 0    |
| PRJNA616244 | SRR11447329 | Apis mellifera | single end | 2020 | NA   | 2018 | NA     | NA            | 46112509 | 6        | 0     | 51    | 0    |
| PRJNA616244 | SRR11447330 | Apis mellifera | single end | 2020 | NA   | 2018 | NA     | NA            | 49695577 | 3        | 0     | 3     | 0    |
| PRJNA616244 | SRR11447331 | Apis mellifera | single end | 2020 | NA   | 2018 | NA     | NA            | 50823552 | 1        | 0     | 1     | 0    |
| PRJNA616244 | SRR11447332 | Apis mellifera | single end | 2020 | NA   | 2018 | NA     | NA            | 42822349 | 2        | 0     | 7     | 0    |
| PRJNA616244 | SRR11447333 | Apis mellifera | single end | 2020 | NA   | 2018 | NA     | NA            | 46033632 | 3        | 0     | 9     | 0    |
| PRJNA616244 | SRR11447334 | Apis mellifera | single end | 2020 | NA   | 2018 | NA     | NA            | 50345141 | 2        | 0     | 0     | 0    |
| PRJNA631022 | SRR11787192 | Apis mellifera | single end | 2021 | 2014 | 2014 | Brazil | South America | 26737359 | 3        | 0     | 0     | 0    |
| PRJNA631022 | SRR11787193 | Apis mellifera | single end | 2021 | 2013 | 2013 | Brazil | South America | 17450484 | 0        | 0     | 1     | 0    |
| PRJNA631022 | SRR11787194 | Apis mellifera | single end | 2021 | 2012 | 2012 | Brazil | South America | 33968207 | 427      | 0     | 460   | 0    |
| PRJNA631022 | SRR11787195 | Apis mellifera | single end | 2021 | 2011 | 2011 | Brazil | South America | 16477446 | 6        | 0     | 14    | 0    |
| PRJNA631022 | SRR11787196 | Apis mellifera | single end | 2021 | 2016 | 2016 | Brazil | South America | 46114520 | 0        | 0     | 0     | 0    |
| PRJNA631022 | SRR11787197 | Apis mellifera | single end | 2021 | 2015 | 2015 | Brazil | South America | 27422580 | 0        | 0     | 0     | 0    |
| PRJNA631022 | SRR11787198 | Apis mellifera | single end | 2021 | 2014 | 2014 | Brazil | South America | 34388243 | 35       | 0     | 33    | 0    |
| PRJNA631022 | SRR11787199 | Apis mellifera | single end | 2021 | 2013 | 2013 | Brazil | South America | 15446157 | 0        | 0     | 1     | 0    |
| PRJNA631022 | SRR11787200 | Apis mellifera | single end | 2021 | 2012 | 2012 | Brazil | South America | 18885127 | 0        | 0     | 1     | 0    |
| PRJNA631022 | SRR11787201 | Apis mellifera | single end | 2021 | 2011 | 2011 | Brazil | South America | 19966313 | 47       | 0     | 34    | 0    |
| PRJNA244920 | SRR1254941  | Apis mellifera | single end | 2018 | NA   | 2016 | NA     | NA            | 8626009  | 22       | 0     | 1     | 0    |
| PRJNA244920 | SRR1254942  | Apis mellifera | single end | 2018 | NA   | 2016 | NA     | NA            | 8957903  | 66118    | 0.74  | 2423  | 0.03 |
| PRJNA244920 | SRR1254943  | Apis mellifera | single end | 2018 | NA   | 2016 | NA     | NA            | 7586964  | 14       | 0     | 0     | 0    |
| PRJNA661322 | SRR12584096 | Apis mellifera | single end | 2020 | 2017 | 2017 | USA    | North America | 4271308  | 9307     | 0.22  | 3     | 0    |
| PRJNA661322 | SRR12584097 | Apis mellifera | single end | 2020 | 2017 | 2017 | USA    | North America | 4587587  | 158969   | 3.47  | 39    | 0    |
| PRJNA661322 | SRR12584098 | Apis mellifera | single end | 2020 | 2017 | 2017 | USA    | North America | 4544013  | 156469   | 3.44  | 48    | 0    |
| PRJNA661322 | SRR12584099 | Apis mellifera | single end | 2020 | 2017 | 2017 | USA    | North America | 4393379  | 150939   | 3.44  | 35    | 0    |
| PRJNA661322 | SRR12584100 | Apis mellifera | single end | 2020 | 2017 | 2017 | USA    | North America | 4908374  | 11458    | 0.23  | 6     | 0    |
| PRJNA661322 | SRR12584101 | Apis mellifera | single end | 2020 | 2017 | 2017 | USA    | North America | 4875263  | 12319    | 0.25  | 3     | 0    |
| PRJNA661322 | SRR12584102 | Apis mellifera | single end | 2020 | 2017 | 2017 | USA    | North America | 4723354  | 12666    | 0.27  | 4     | 0    |
| PRJNA661322 | SRR12584103 | Apis mellifera | single end | 2020 | 2017 | 2017 | USA    | North America | 5668938  | 1985     | 0.04  | 2     | 0    |
| PRJNA661322 | SRR12584104 | Apis mellifera | single end | 2020 | 2017 | 2017 | USA    | North America | 5580542  | 2544     | 0.05  | 2     | 0    |
| PRJNA661322 | SRR12584105 | Apis mellifera | single end | 2020 | 2017 | 2017 | USA    | North America | 5453653  | 2783     | 0.05  | 2     | 0    |
| PRJNA661322 | SRR12584106 | Apis mellifera | single end | 2020 | 2017 | 2017 | USA    | North America | 2918971  | 229559   | 7.86  | 31    | 0    |
| PRJNA661322 | SRR12584107 | Apis mellifera | single end | 2020 | 2017 | 2017 | USA    | North America | 5650897  | 1594     | 0.03  | 1     | 0    |
| PRJNA661322 | SRR12584108 | Apis mellifera | single end | 2020 | 2017 | 2017 | USA    | North America | 5578723  | 2214     | 0.04  | 2     | 0    |
| PRJNA661322 | SRR12584109 | Apis mellifera | single end | 2020 | 2017 | 2017 | USA    | North America | 5393079  | 2417     | 0.04  | 3     | 0    |
| PRJNA661322 | SRR12584110 | Apis mellifera | single end | 2020 | 2017 | 2017 | USA    | North America | 4723753  | 1271     | 0.03  | 0     | 0    |
| PRJNA661322 | SRR12584111 | Apis mellifera | single end | 2020 | 2017 | 2017 | USA    | North America | 4675412  | 1691     | 0.04  | 1     | 0    |
| PRJNA661322 | SRR12584112 | Apis mellifera | single end | 2020 | 2017 | 2017 | USA    | North America | 4547289  | 1764     | 0.04  | 1     | 0    |
| PRJNA661322 | SRR12584113 | Apis mellifera | single end | 2020 | 2017 | 2017 | USA    | North America | 2254489  | 223221   | 9.9   | 72    | 0    |
| PRJNA661322 | SRR12584114 | Apis mellifera | single end | 2020 | 2017 | 2017 | USA    | North America | 2259647  | 221027   | 9.78  | 55    | 0    |
| PRJNA661322 | SRR12584115 | Apis mellifera | single end | 2020 | 2017 | 2017 | USA    | North America | 2269245  | 223039   | 9.83  | 48    | 0    |
| PRJNA661322 | SRR12584116 | Apis mellifera | single end | 2020 | 2017 | 2017 | USA    | North America | 2967118  | 270135   | 9.1   | 23    | 0    |
| PRJNA661322 | SRR12584117 | Apis mellifera | single end | 2020 | 2017 | 2017 | USA    | North America | 2068919  | 2125     | 0.1   | 0     | 0    |
| PRJNA661322 | SRR12584118 | Apis mellifera | single end | 2020 | 2017 | 2017 | USA    | North America | 3034331  | 279128   | 9.2   | 22    | 0    |
| PRJNA661322 | SRR12584119 | Apis mellifera | single end | 2020 | 2017 | 2017 | USA    | North America | 2992440  | 272498   | 9.11  | 25    | 0    |
| PRJNA661322 | SRR12584120 | Apis mellifera | single end | 2020 | 2017 | 2017 | USA    | North America | 2334073  | 746307   | 31.97 | 59    | 0    |
| PRJNA661322 | SRR12584121 | Apis mellifera | single end | 2020 | 2017 | 2017 | USA    | North America | 2388791  | 766806   | 32.1  | 59    | 0    |
| PRJNA661322 | SRR12584122 | Apis mellifera | single end | 2020 | 2017 | 2017 | USA    | North America | 2360872  | 748570   | 31.71 | 47    | 0    |
| PRJNA661322 | SRR12584123 | Apis mellifera | single end | 2020 | 2017 | 2017 | USA    | North America | 2251587  | 1563     | 0.07  | 0     | 0    |
| PRJNA661322 | SRR12584124 | Apis mellifera | single end | 2020 | 2017 | 2017 | USA    | North America | 2294731  | 1818     | 0.08  | 1     | 0    |
| PRJNA661322 | SRR12584125 | Apis mellifera | single end | 2020 | 2017 | 2017 | USA    | North America | 2284963  | 1920     | 0.08  | 0     | 0    |
| PRJNA661322 | SRR12584126 | Apis mellifera | single end | 2020 | 2017 | 2017 | USA    | North America | 2648451  | 1334     | 0.05  | 1     | 0    |
| PRJNA661322 | SRR12584127 | Apis mellifera | single end | 2020 | 2017 | 2017 | USA    | North America | 2684469  | 1496     | 0.06  | 0     | 0    |
| PRJNA661322 | SRR12584128 | Apis mellifera | single end | 2020 | 2017 | 2017 | USA    | North America | 2127710  | 2435     | 0.11  | 0     | 0    |
| PRJNA661322 | SRR12584129 | Apis mellifera | single end | 2020 | 2017 | 2017 | USA    | North America | 2665666  | 1621     | 0.06  | 2     | 0    |
| PRJNA661322 | SRR12584130 | Apis mellifera | single end | 2020 | 2017 | 2017 | USA    | North America | 2330936  | 502130   | 21.54 | 74    | 0    |
| PRJNA661322 | SRR12584131 | Apis mellifera | single end | 2020 | 2017 | 2017 | USA    | North America | 2372591  | 513647   | 21.65 | 70    | 0    |
| PRJNA661322 | SRR12584132 | Apis mellifera | single end | 2020 | 2017 | 2017 | USA    | North America | 2350479  | 502721   | 21.39 | 80    | 0    |
| PRJNA661322 | SRR12584133 | Apis mellifera | single end | 2020 | 2017 | 2017 | USA    | North America | 2611271  | 663218   | 25.4  | 154   | 0.01 |
| PRJNA661322 | SRR12584134 | Apis mellifera | single end | 2020 | 2017 | 2017 | USA    | North America | 2657107  | 680349   | 25.6  | 129   | 0    |
| PRJNA661322 | SRR12584135 | Apis mellifera | single end | 2020 | 2017 | 2017 | USA    | North America | 2637869  | 668882   | 25.36 | 132   | 0.01 |
| PRJNA661322 | SRR12584136 | Apis mellifera | single end | 2020 | 2017 | 2017 | USA    | North America | 3382777  | 1491658  | 44.1  | 130   | 0    |
| PRJNA661322 | SRR12584137 | Apis mellifera | single end | 2020 | 2017 | 2017 | USA    | North America | 3469932  | 1532951  | 44.18 | 113   | 0    |
| PRJNA661322 | SRR12584138 | Apis mellifera | single end | 2020 | 2017 | 2017 | USA    | North America | 3434161  | 1501510  | 43.72 | 163   | 0    |
| PRJNA661322 | SRR12584139 | Apis mellifera | single end | 2020 | 2017 | 2017 | USA    | North America | 2094387  | 2545     | 0.12  | 1     | 0    |
| PRJNA661322 | SRR12584140 | Apis mellifera | single end | 2020 | 2017 | 2017 | USA    | North America | 2977158  | 414024   | 13.91 | 76    | 0    |
| PRJNA661322 | SRR12584141 | Apis mellifera | single end | 2020 | 2017 | 2017 | USA    | North America | 2986954  | 410816   | 13.75 | 82    | 0    |
| PRJNA661322 | SRR12584142 | Apis mellifera | single end | 2020 | 2017 | 2017 | USA    | North America | 3020486  | 414535   | 13.72 | 84    | 0    |
| PRJNA661322 | SRR12584143 | Apis mellifera | single end | 2020 | 2017 | 2017 | USA    | North America | 3604870  | 2716     | 0.08  | 0     | 0    |
| PRJNA661322 | SRR12584144 | Apis mellifera | single end | 2020 | 2017 | 2017 | USA    | North America | 3666763  | 2854     | 0.08  | 1     | 0    |
| PRJNA661322 | SRR12584145 | Apis mellifera | single end | 2020 | 2017 | 2017 | USA    | North America | 3659623  | 3235     | 0.09  | 3     | 0    |
| PRJNA661322 | SRR12584146 | Apis mellifera | single end | 2020 | 2017 | 2017 | USA    | North America | 2133447  | 508088   | 23.82 | 48    | 0    |
| PRJNA661322 | SRR12584147 | Apis mellifera | single end | 2020 | 2017 | 2017 | USA    | North America | 2137261  | 518435   | 24.26 | 42    | 0    |
| PRJNA661322 | SRR12584148 | Apis mellifera | single end | 2020 | 2017 | 2017 | USA    | North America | 2162866  | 509997   | 23.58 | 49    | 0    |
| PRJNA661322 | SRR12584149 | Apis mellifera | single end | 2020 | 2017 | 2017 | USA    | North America | 2423917  | 381625   | 15.74 | 30    | 0    |
| PRJNA661322 | SRR12       |                |            |      |      |      |        |               |          |          |       |       |      |



|             |             |                |            |      |      |      |     |               |         |         |       |      |      |
|-------------|-------------|----------------|------------|------|------|------|-----|---------------|---------|---------|-------|------|------|
| PRJNA661322 | SRR12584163 | Apis mellifera | single end | 2020 | 2017 | 2017 | USA | North America | 2498391 | 26175   | 1.05  | 4    | 0    |
| PRJNA661322 | SRR12584164 | Apis mellifera | single end | 2020 | 2017 | 2017 | USA | North America | 2570721 | 27461   | 1.07  | 0    | 0    |
| PRJNA661322 | SRR12584165 | Apis mellifera | single end | 2020 | 2017 | 2017 | USA | North America | 2522417 | 26577   | 1.05  | 1    | 0    |
| PRJNA661322 | SRR12584166 | Apis mellifera | single end | 2020 | 2017 | 2017 | USA | North America | 2489222 | 349133  | 14.03 | 30   | 0    |
| PRJNA661322 | SRR12584167 | Apis mellifera | single end | 2020 | 2017 | 2017 | USA | North America | 2524029 | 356625  | 14.13 | 35   | 0    |
| PRJNA661322 | SRR12584168 | Apis mellifera | single end | 2020 | 2017 | 2017 | USA | North America | 2507252 | 350946  | 14    | 47   | 0    |
| PRJNA661322 | SRR12584169 | Apis mellifera | single end | 2020 | 2017 | 2017 | USA | North America | 3420406 | 2599    | 0.08  | 1    | 0    |
| PRJNA661322 | SRR12584170 | Apis mellifera | single end | 2020 | 2017 | 2017 | USA | North America | 3336790 | 2967    | 0.09  | 4    | 0    |
| PRJNA661322 | SRR12584171 | Apis mellifera | single end | 2020 | 2017 | 2017 | USA | North America | 3212443 | 2868    | 0.09  | 2    | 0    |
| PRJNA661322 | SRR12584172 | Apis mellifera | single end | 2020 | 2017 | 2017 | USA | North America | 4332757 | 583884  | 13.48 | 116  | 0    |
| PRJNA661322 | SRR12584173 | Apis mellifera | single end | 2020 | 2017 | 2017 | USA | North America | 3333251 | 398700  | 11.96 | 61   | 0    |
| PRJNA661322 | SRR12584174 | Apis mellifera | single end | 2020 | 2017 | 2017 | USA | North America | 3356879 | 398791  | 11.88 | 64   | 0    |
| PRJNA661322 | SRR12584175 | Apis mellifera | single end | 2020 | 2017 | 2017 | USA | North America | 3363303 | 397596  | 11.82 | 56   | 0    |
| PRJNA661322 | SRR12584176 | Apis mellifera | single end | 2020 | 2017 | 2017 | USA | North America | 3466826 | 425876  | 12.28 | 58   | 0    |
| PRJNA661322 | SRR12584177 | Apis mellifera | single end | 2020 | 2017 | 2017 | USA | North America | 3490718 | 428304  | 12.27 | 55   | 0    |
| PRJNA661322 | SRR12584178 | Apis mellifera | single end | 2020 | 2017 | 2017 | USA | North America | 3506626 | 427801  | 12.2  | 52   | 0    |
| PRJNA661322 | SRR12584179 | Apis mellifera | single end | 2020 | 2017 | 2017 | USA | North America | 2238943 | 287003  | 12.82 | 25   | 0    |
| PRJNA661322 | SRR12584180 | Apis mellifera | single end | 2020 | 2017 | 2017 | USA | North America | 2309454 | 297767  | 12.89 | 20   | 0    |
| PRJNA661322 | SRR12584181 | Apis mellifera | single end | 2020 | 2017 | 2017 | USA | North America | 2278159 | 291572  | 12.8  | 21   | 0    |
| PRJNA661322 | SRR12584182 | Apis mellifera | single end | 2020 | 2017 | 2017 | USA | North America | 3234576 | 326209  | 10.09 | 54   | 0    |
| PRJNA661322 | SRR12584183 | Apis mellifera | single end | 2020 | 2017 | 2017 | USA | North America | 4050903 | 1933    | 0.05  | 0    | 0    |
| PRJNA661322 | SRR12584184 | Apis mellifera | single end | 2020 | 2017 | 2017 | USA | North America | 3264613 | 328707  | 10.07 | 49   | 0    |
| PRJNA661322 | SRR12584185 | Apis mellifera | single end | 2020 | 2017 | 2017 | USA | North America | 4493697 | 205520  | 4.57  | 17   | 0    |
| PRJNA661322 | SRR12584186 | Apis mellifera | single end | 2020 | 2017 | 2017 | USA | North America | 4516345 | 453832  | 10.05 | 235  | 0.01 |
| PRJNA661322 | SRR12584187 | Apis mellifera | single end | 2020 | 2017 | 2017 | USA | North America | 4403323 | 438137  | 9.95  | 215  | 0    |
| PRJNA661322 | SRR12584188 | Apis mellifera | single end | 2020 | 2017 | 2017 | USA | North America | 4304688 | 426905  | 9.92  | 233  | 0.01 |
| PRJNA661322 | SRR12584189 | Apis mellifera | single end | 2020 | 2017 | 2017 | USA | North America | 3549411 | 585610  | 16.5  | 166  | 0    |
| PRJNA661322 | SRR12584190 | Apis mellifera | single end | 2020 | 2017 | 2017 | USA | North America | 3463634 | 572594  | 16.53 | 161  | 0    |
| PRJNA661322 | SRR12584191 | Apis mellifera | single end | 2020 | 2017 | 2017 | USA | North America | 3350317 | 547666  | 16.35 | 133  | 0    |
| PRJNA661322 | SRR12584192 | Apis mellifera | single end | 2020 | 2017 | 2017 | USA | North America | 4907534 | 806085  | 16.43 | 105  | 0    |
| PRJNA661322 | SRR12584193 | Apis mellifera | single end | 2020 | 2017 | 2017 | USA | North America | 4810960 | 782228  | 16.26 | 114  | 0    |
| PRJNA661322 | SRR12584194 | Apis mellifera | single end | 2020 | 2017 | 2017 | USA | North America | 4681415 | 754445  | 16.12 | 96   | 0    |
| PRJNA661322 | SRR12584195 | Apis mellifera | single end | 2020 | 2017 | 2017 | USA | North America | 2888857 | 438710  | 15.19 | 71   | 0    |
| PRJNA661322 | SRR12584196 | Apis mellifera | single end | 2020 | 2017 | 2017 | USA | North America | 3940760 | 1522    | 0.04  | 0    | 0    |
| PRJNA661322 | SRR12584197 | Apis mellifera | single end | 2020 | 2017 | 2017 | USA | North America | 3877680 | 1979    | 0.05  | 0    | 0    |
| PRJNA661322 | SRR12584198 | Apis mellifera | single end | 2020 | 2017 | 2017 | USA | North America | 3758617 | 2032    | 0.05  | 3    | 0    |
| PRJNA661322 | SRR12584199 | Apis mellifera | single end | 2020 | 2017 | 2017 | USA | North America | 2535429 | 1558567 | 61.47 | 312  | 0.01 |
| PRJNA661322 | SRR12584200 | Apis mellifera | single end | 2020 | 2017 | 2017 | USA | North America | 2491819 | 1521293 | 61.05 | 305  | 0.01 |
| PRJNA661322 | SRR12584201 | Apis mellifera | single end | 2020 | 2017 | 2017 | USA | North America | 2414325 | 1458035 | 60.39 | 342  | 0.01 |
| PRJNA661322 | SRR12584202 | Apis mellifera | single end | 2020 | 2017 | 2017 | USA | North America | 2736703 | 1167    | 0.04  | 15   | 0    |
| PRJNA661322 | SRR12584203 | Apis mellifera | single end | 2020 | 2017 | 2017 | USA | North America | 2705713 | 1392    | 0.05  | 11   | 0    |
| PRJNA661322 | SRR12584204 | Apis mellifera | single end | 2020 | 2017 | 2017 | USA | North America | 2593195 | 1512    | 0.06  | 16   | 0    |
| PRJNA661322 | SRR12584205 | Apis mellifera | single end | 2020 | 2017 | 2017 | USA | North America | 2668434 | 1026944 | 38.48 | 57   | 0    |
| PRJNA661322 | SRR12584206 | Apis mellifera | single end | 2020 | 2017 | 2017 | USA | North America | 3197306 | 2834    | 0.09  | 2    | 0    |
| PRJNA661322 | SRR12584207 | Apis mellifera | single end | 2020 | 2017 | 2017 | USA | North America | 2644847 | 1010641 | 38.21 | 82   | 0    |
| PRJNA661322 | SRR12584208 | Apis mellifera | single end | 2020 | 2017 | 2017 | USA | North America | 2522711 | 956425  | 37.91 | 69   | 0    |
| PRJNA661322 | SRR12584209 | Apis mellifera | single end | 2020 | 2017 | 2017 | USA | North America | 2880013 | 1143    | 0.04  | 0    | 0    |
| PRJNA661322 | SRR12584210 | Apis mellifera | single end | 2020 | 2017 | 2017 | USA | North America | 2830970 | 1380    | 0.05  | 0    | 0    |
| PRJNA661322 | SRR12584211 | Apis mellifera | single end | 2020 | 2017 | 2017 | USA | North America | 2716475 | 1557    | 0.06  | 1    | 0    |
| PRJNA661322 | SRR12584212 | Apis mellifera | single end | 2020 | 2017 | 2017 | USA | North America | 2834000 | 2219904 | 78.33 | 184  | 0.01 |
| PRJNA661322 | SRR12584213 | Apis mellifera | single end | 2020 | 2017 | 2017 | USA | North America | 2801620 | 2183497 | 77.94 | 214  | 0.01 |
| PRJNA661322 | SRR12584214 | Apis mellifera | single end | 2020 | 2017 | 2017 | USA | North America | 2672443 | 2066825 | 77.34 | 208  | 0.01 |
| PRJNA661322 | SRR12584215 | Apis mellifera | single end | 2020 | 2017 | 2017 | USA | North America | 3538113 | 43010   | 1.22  | 3    | 0    |
| PRJNA661322 | SRR12584216 | Apis mellifera | single end | 2020 | 2017 | 2017 | USA | North America | 3498106 | 42530   | 1.22  | 3    | 0    |
| PRJNA661322 | SRR12584217 | Apis mellifera | single end | 2020 | 2017 | 2017 | USA | North America | 3258237 | 2996    | 0.09  | 3    | 0    |
| PRJNA661322 | SRR12584218 | Apis mellifera | single end | 2020 | 2017 | 2017 | USA | North America | 3351661 | 40132   | 1.2   | 7    | 0    |
| PRJNA661322 | SRR12584219 | Apis mellifera | single end | 2020 | 2017 | 2017 | USA | North America | 3476039 | 2285831 | 65.76 | 1416 | 0.04 |
| PRJNA661322 | SRR12584220 | Apis mellifera | single end | 2020 | 2017 | 2017 | USA | North America | 3454456 | 2256645 | 65.33 | 1428 | 0.04 |
| PRJNA661322 | SRR12584221 | Apis mellifera | single end | 2020 | 2017 | 2017 | USA | North America | 3309398 | 2137916 | 64.6  | 1430 | 0.04 |
| PRJNA661322 | SRR12584222 | Apis mellifera | single end | 2020 | 2017 | 2017 | USA | North America | 3951563 | 974935  | 24.67 | 332  | 0.01 |
| PRJNA661322 | SRR12584223 | Apis mellifera | single end | 2020 | 2017 | 2017 | USA | North America | 3876585 | 950400  | 24.52 | 327  | 0.01 |
| PRJNA661322 | SRR12584224 | Apis mellifera | single end | 2020 | 2017 | 2017 | USA | North America | 3762720 | 911572  | 24.23 | 344  | 0.01 |
| PRJNA661322 | SRR12584225 | Apis mellifera | single end | 2020 | 2017 | 2017 | USA | North America | 3034087 | 489932  | 16.15 | 111  | 0    |
| PRJNA661322 | SRR12584226 | Apis mellifera | single end | 2020 | 2017 | 2017 | USA | North America | 2983222 | 467159  | 15.66 | 102  | 0    |
| PRJNA661322 | SRR12584227 | Apis mellifera | single end | 2020 | 2017 | 2017 | USA | North America | 2902642 | 462117  | 15.92 | 118  | 0    |
| PRJNA661322 | SRR12584228 | Apis mellifera | single end | 2020 | 2017 | 2017 | USA | North America | 3244125 | 3303    | 0.1   | 2    | 0    |
| PRJNA661322 | SRR12584229 | Apis mellifera | single end | 2020 | 2017 | 2017 | USA | North America | 2068189 | 859433  | 41.55 | 175  | 0.01 |
| PRJNA661322 | SRR12584230 | Apis mellifera | single end | 2020 | 2017 | 2017 | USA | North America | 2035287 | 833359  | 40.95 | 166  | 0.01 |
| PRJNA661322 | SRR12584231 | Apis mellifera | single end | 2020 | 2017 | 2017 | USA | North America | 1981217 | 806392  | 40.7  | 157  | 0.01 |
| PRJNA661322 | SRR12584232 | Apis mellifera | single end | 2020 | 2017 | 2017 | USA | North America | 4082872 | 3430    | 0.08  | 4    | 0    |
| PRJNA661322 | SRR12584233 | Apis mellifera | single end | 2020 | 2017 | 2017 | USA | North America | 4018734 | 4008    | 0.1   | 1    | 0    |
| PRJNA661322 | SRR12584234 | Apis mellifera | single end | 2020 | 2017 | 2017 | USA | North America | 3876821 | 4219    | 0.11  | 0    | 0    |
| PRJNA661322 | SRR12584235 | Apis mellifera | single end | 2020 | 2017 | 2017 | USA | North America | 4611196 | 3048062 | 66.1  | 1449 | 0.03 |
| PRJNA661322 | SRR12584236 | Apis mellifera | single end | 2020 | 2017 | 2017 | USA | North America | 4578460 | 2997791 | 65.48 | 1383 | 0.03 |
| PRJNA661322 | SRR12584237 | Apis mellifera | single end | 2020 | 2017 | 2017 | USA | North America | 4465033 | 2883290 | 64.57 | 1389 | 0.03 |
| PRJNA661322 | SRR12584238 | Apis mellifera | single end | 2020 | 2017 | 2017 | USA | North America | 3410799 | 2495    | 0.07  | 1    | 0    |
| PRJNA661322 | SRR12584239 | Apis mellifera | single end | 2020 | 2017 | 2017 | USA | North America | 2873865 | 227079  | 7.9   | 29   | 0    |
| PRJNA661322 | SRR12584240 | Apis mellifera | single end | 2020 | 2017 | 2017 | USA | North America | 3357913 | 2919    | 0.09  | 0    | 0    |
| PRJNA661322 | SRR12584241 | Apis mellifera | single end | 2020 | 2017 | 2017 | USA | North America | 3276918 | 3097    | 0.09  | 1    | 0    |
| PRJNA661322 | SRR12584242 | Apis mellifera | single end | 2020 | 2017 | 2017 | USA | North America | 2809419 | 1399593 | 49.82 | 114  | 0    |
| PRJNA661322 | SRR12584243 | Apis mellifera | single end | 2020 | 2017 | 2017 | USA | North America | 2809384 | 1382318 | 49.2  | 147  | 0.01 |
| PRJNA661322 | SRR12584244 | Apis mellifera | single end | 2020 | 2017 | 2017 | USA | North America | 2714767 | 1322221 | 48.7  | 144  | 0.01 |
| PRJNA661322 | SRR12584245 | Apis mellifera | single end | 2020 | 2017 | 2017 | USA | North America | 2806384 | 2067186 | 73.66 | 448  | 0.02 |
| PRJNA661322 | SRR12584246 | Apis mellifera | single end | 2020 | 2017 | 2017 | USA | North America | 2777124 | 2028628 | 73.05 | 417  | 0.02 |
| PRJNA661322 | SRR12584247 | Apis mellifera | single end | 2020 | 2017 | 2017 | USA | North America | 2666456 | 1935654 | 72.59 | 472  | 0.02 |
| PRJNA661322 | SRR12584248 | Apis mellifera | single end | 2020 | 2017 | 2017 | USA | North America | 4458983 | 8298    | 0.19  | 2    | 0    |
| PRJNA661322 | SRR12584249 | Apis mellifera | single end | 2020 | 2017 | 2017 | USA | North America | 3314397 | 651     | 0.02  | 0    | 0    |
| PRJNA661322 | SRR12584250 | Apis mellifera | single end | 2020 | 2017 | 2017 | USA | North America | 3457007 | 810     | 0.02  | 0    | 0    |
| PRJNA661322 | SRR12584251 | Apis mellifera | single end | 2020 | 2017 | 2017 | USA | North America | 3301471 | 902     | 0.03  | 1    | 0    |
| PRJNA661322 | SRR12584252 | Apis mellifera | single end | 2020 | 2017 | 2017 | USA | North America | 3707907 | 852     | 0.02  | 0    | 0    |
| PRJNA661322 | SRR12584253 | Apis mellifera | single end | 2020 | 2017 | 2017 | USA | North America | 3887052 | 1105    | 0.03  | 0    | 0    |
| PRJNA661322 | SRR12584254 | Apis mellifera |            |      |      |      |     |               |         |         |       |      |      |

|             |             |                |            |      |      |      |        |               |            |          |       |      |      |
|-------------|-------------|----------------|------------|------|------|------|--------|---------------|------------|----------|-------|------|------|
| PRJNA661322 | SRR12584269 | Apis mellifera | single end | 2020 | 2017 | 2017 | USA    | North America | 2829433    | 432773   | 15.3  | 68   | 0    |
| PRJNA661322 | SRR12584270 | Apis mellifera | single end | 2020 | 2017 | 2017 | USA    | North America | 4144859    | 1067103  | 25.75 | 101  | 0    |
| PRJNA661322 | SRR12584271 | Apis mellifera | single end | 2020 | 2017 | 2017 | USA    | North America | 3972762    | 1012686  | 25.49 | 77   | 0    |
| PRJNA661322 | SRR12584272 | Apis mellifera | single end | 2020 | 2017 | 2017 | USA    | North America | 3784747    | 932627   | 24.64 | 105  | 0    |
| PRJNA661322 | SRR12584273 | Apis mellifera | single end | 2020 | 2017 | 2017 | USA    | North America | 3728920    | 913771   | 24.5  | 84   | 0    |
| PRJNA661322 | SRR12584274 | Apis mellifera | single end | 2020 | 2017 | 2017 | USA    | North America | 3610325    | 875980   | 24.26 | 111  | 0    |
| PRJNA661322 | SRR12584275 | Apis mellifera | single end | 2020 | 2017 | 2017 | USA    | North America | 5346510    | 553574   | 10.35 | 79   | 0    |
| PRJNA661322 | SRR12584276 | Apis mellifera | single end | 2020 | 2017 | 2017 | USA    | North America | 5248796    | 538675   | 10.26 | 91   | 0    |
| PRJNA661322 | SRR12584277 | Apis mellifera | single end | 2020 | 2017 | 2017 | USA    | North America | 5093209    | 518994   | 10.19 | 100  | 0    |
| PRJNA661322 | SRR12584278 | Apis mellifera | single end | 2020 | 2017 | 2017 | USA    | North America | 4737422    | 218775   | 4.62  | 21   | 0    |
| PRJNA661322 | SRR12584279 | Apis mellifera | single end | 2020 | 2017 | 2017 | USA    | North America | 4623619    | 213355   | 4.61  | 21   | 0    |
| PRJNA661322 | SRR12584280 | Apis mellifera | single end | 2020 | 2017 | 2017 | USA    | North America | 2882635    | 442878   | 15.36 | 74   | 0    |
| PRJNA661322 | SRR12584281 | Apis mellifera | single end | 2020 | 2017 | 2017 | USA    | North America | 4399593    | 8973     | 0.2   | 5    | 0    |
| PRJNA661322 | SRR12584282 | Apis mellifera | single end | 2020 | 2017 | 2017 | USA    | North America | 2932975    | 233461   | 7.96  | 11   | 0    |
| PRJNA661322 | SRR12584283 | Apis mellifera | single end | 2020 | 2017 | 2017 | USA    | North America | 4087923    | 2109     | 0.05  | 1    | 0    |
| PRJNA661322 | SRR12584284 | Apis mellifera | single end | 2020 | 2017 | 2017 | USA    | North America | 4107145    | 2381     | 0.06  | 0    | 0    |
| PRJNA668751 | SRR12810599 | Apis mellifera | single end | 2021 | NA   | 2019 | NA     | NA            | 73545785   | 1        | 0     | 0    | 0    |
| PRJNA668751 | SRR12810600 | Apis mellifera | single end | 2021 | NA   | 2019 | NA     | NA            | 69219183   | 1        | 0     | 0    | 0    |
| PRJNA668751 | SRR12810601 | Apis mellifera | single end | 2021 | NA   | 2019 | NA     | NA            | 80689063   | 3        | 0     | 0    | 0    |
| PRJNA668751 | SRR12810602 | Apis mellifera | single end | 2021 | NA   | 2019 | NA     | NA            | 70893558   | 0        | 0     | 1    | 0    |
| PRJNA668751 | SRR12810603 | Apis mellifera | single end | 2021 | NA   | 2019 | NA     | NA            | 68941625   | 1        | 0     | 0    | 0    |
| PRJNA668751 | SRR12810604 | Apis mellifera | single end | 2021 | NA   | 2019 | NA     | NA            | 69103047   | 2        | 0     | 0    | 0    |
| PRJNA668751 | SRR12810605 | Apis mellifera | single end | 2021 | NA   | 2019 | NA     | NA            | 74761874   | 2281     | 0     | 4    | 0    |
| PRJNA668751 | SRR12810606 | Apis mellifera | single end | 2021 | NA   | 2019 | NA     | NA            | 88100392   | 10       | 0     | 2    | 0    |
| PRJNA668751 | SRR12810607 | Apis mellifera | single end | 2021 | NA   | 2019 | NA     | NA            | 71080138   | 1        | 0     | 0    | 0    |
| PRJNA668751 | SRR12810608 | Apis mellifera | single end | 2021 | NA   | 2019 | NA     | NA            | 63404944   | 1        | 0     | 0    | 0    |
| PRJNA668751 | SRR12810609 | Apis mellifera | single end | 2021 | NA   | 2019 | NA     | NA            | 64624747   | 4        | 0     | 0    | 0    |
| PRJNA668751 | SRR12810610 | Apis mellifera | single end | 2021 | NA   | 2019 | NA     | NA            | 69666200   | 0        | 0     | 0    | 0    |
| PRJNA257666 | SRR1538449  | Apis mellifera | single end | 2015 | NA   | 2013 | NA     | NA            | 17417565   | 10       | 0     | 3    | 0    |
| PRJNA257666 | SRR1538718  | Apis mellifera | single end | 2015 | NA   | 2013 | NA     | NA            | 9899631    | 0        | 0     | 0    | 0    |
| PRJNA257666 | SRR1538749  | Apis mellifera | single end | 2015 | NA   | 2013 | NA     | NA            | 38030892   | 0        | 0     | 0    | 0    |
| PRJNA257666 | SRR1538849  | Apis mellifera | single end | 2015 | NA   | 2013 | NA     | NA            | 37086884   | 0        | 0     | 0    | 0    |
| PRJNA257666 | SRR1538850  | Apis mellifera | single end | 2015 | NA   | 2013 | NA     | NA            | 163202336  | 0        | 0     | 0    | 0    |
| PRJNA257666 | SRR1538876  | Apis mellifera | single end | 2015 | NA   | 2013 | NA     | NA            | 32219748   | 0        | 0     | 0    | 0    |
| PRJNA257666 | SRR1538877  | Apis mellifera | single end | 2015 | NA   | 2013 | NA     | NA            | 40486094   | 0        | 0     | 0    | 0    |
| PRJNA257666 | SRR1538878  | Apis mellifera | single end | 2015 | NA   | 2013 | NA     | NA            | 37487408   | 0        | 0     | 0    | 0    |
| PRJNA257666 | SRR1538934  | Apis mellifera | single end | 2015 | NA   | 2013 | NA     | NA            | 22902101   | 954      | 0     | 88   | 0    |
| PRJNA257666 | SRR1538974  | Apis mellifera | single end | 2015 | NA   | 2013 | NA     | NA            | 17060175   | 3        | 0     | 0    | 0    |
| PRJNA257666 | SRR1539264  | Apis mellifera | single end | 2015 | NA   | 2013 | NA     | NA            | 40213259   | 126      | 0     | 1    | 0    |
| PRJNA257666 | SRR1539284  | Apis mellifera | single end | 2015 | NA   | 2013 | NA     | NA            | 33295431   | 9551     | 0.03  | 412  | 0    |
| PRJNA257666 | SRR1539287  | Apis mellifera | single end | 2015 | NA   | 2013 | NA     | NA            | 82208246   | 2        | 0     | 1    | 0    |
| PRJNA257666 | SRR1539288  | Apis mellifera | single end | 2015 | NA   | 2013 | NA     | NA            | 32955026   | 412      | 0     | 12   | 0    |
| PRJNA260922 | SRR1574323  | Apis mellifera | single end | 2015 | NA   | 2013 | NA     | NA            | 113029993  | 0        | 0     | 0    | 0    |
| PRJNA260922 | SRR1574325  | Apis mellifera | single end | 2015 | NA   | 2013 | NA     | NA            | 71120522   | 0        | 0     | 0    | 0    |
| PRJNA260922 | SRR1574326  | Apis mellifera | single end | 2015 | NA   | 2013 | NA     | NA            | 33683147   | 2        | 0     | 0    | 0    |
| PRJNA260922 | SRR1574327  | Apis mellifera | single end | 2015 | NA   | 2013 | NA     | NA            | 31171886   | 7        | 0     | 0    | 0    |
| PRJNA263933 | SRR1613229  | Apis mellifera | single end | 2015 | NA   | 2013 | NA     | NA            | 88942714   | 252      | 0     | 14   | 0    |
| PRJNA268450 | SRR1662285  | Apis mellifera | single end | 2017 | NA   | 2015 | France | Europe        | 19536465   | 2956022  | 15.13 | 1679 | 0.01 |
| PRJNA268450 | SRR1662286  | Apis mellifera | single end | 2017 | NA   | 2015 | France | Europe        | 45777936   | 6312043  | 13.79 | 2153 | 0    |
| PRJNA268450 | SRR1662287  | Apis mellifera | single end | 2017 | NA   | 2015 | France | Europe        | 50057199   | 8806188  | 17.59 | 3766 | 0.01 |
| PRJNA268450 | SRR1662288  | Apis mellifera | single end | 2017 | NA   | 2015 | France | Europe        | 60209077   | 10832227 | 17.99 | 6136 | 0.01 |
| PRJNA268450 | SRR1662289  | Apis mellifera | single end | 2017 | NA   | 2015 | France | Europe        | 21484068   | 4601841  | 21.42 | 2385 | 0.01 |
| PRJNA268450 | SRR1662290  | Apis mellifera | single end | 2017 | NA   | 2015 | France | Europe        | 55722219   | 16377709 | 29.39 | 5563 | 0.01 |
| PRJNA268450 | SRR1662291  | Apis mellifera | single end | 2017 | NA   | 2015 | France | Europe        | 77733897   | 18604181 | 23.93 | 8452 | 0.01 |
| PRJNA268450 | SRR1662292  | Apis mellifera | single end | 2017 | NA   | 2015 | France | Europe        | 49184602   | 15798905 | 32.12 | 6046 | 0.01 |
| PRJNA268450 | SRR1662293  | Apis mellifera | single end | 2017 | NA   | 2015 | France | Europe        | 103455670  | 9623     | 0.01  | 39   | 0    |
| PRJNA268450 | SRR1662294  | Apis mellifera | single end | 2017 | NA   | 2015 | France | Europe        | 52308319   | 3693     | 0.01  | 0    | 0    |
| PRJNA268450 | SRR1662295  | Apis mellifera | single end | 2017 | NA   | 2015 | France | Europe        | 78188150   | 6593281  | 8.43  | 2962 | 0    |
| PRJNA268450 | SRR1662296  | Apis mellifera | single end | 2017 | NA   | 2015 | France | Europe        | 54007997   | 5868     | 0.01  | 23   | 0    |
| PRJNA268450 | SRR1662297  | Apis mellifera | single end | 2017 | NA   | 2015 | France | Europe        | 27540844   | 6337     | 0.02  | 6    | 0    |
| PRJNA275154 | SRR1798739  | Apis mellifera | single end | 2015 | NA   | 2013 | NA     | NA            | 22298993   | 0        | 0     | 0    | 0    |
| PRJNA275154 | SRR1798740  | Apis mellifera | single end | 2015 | NA   | 2013 | NA     | NA            | 28682552   | 0        | 0     | 0    | 0    |
| PRJNA275154 | SRR1798741  | Apis mellifera | single end | 2015 | NA   | 2013 | NA     | NA            | 27029437   | 0        | 0     | 0    | 0    |
| PRJNA275154 | SRR1798742  | Apis mellifera | single end | 2015 | NA   | 2013 | NA     | NA            | 30430854   | 0        | 0     | 0    | 0    |
| PRJNA275154 | SRR1798743  | Apis mellifera | single end | 2015 | NA   | 2013 | NA     | NA            | 26697130   | 0        | 0     | 0    | 0    |
| PRJNA275154 | SRR1798744  | Apis mellifera | single end | 2015 | NA   | 2013 | NA     | NA            | 30591917   | 1        | 0     | 0    | 0    |
| PRJNA275154 | SRR1798745  | Apis mellifera | single end | 2015 | NA   | 2013 | NA     | NA            | 29588813   | 0        | 0     | 0    | 0    |
| PRJNA275154 | SRR1798746  | Apis mellifera | single end | 2015 | NA   | 2013 | NA     | NA            | 31879217   | 1        | 0     | 0    | 0    |
| PRJNA275154 | SRR1798747  | Apis mellifera | single end | 2015 | NA   | 2013 | NA     | NA            | 31461346   | 0        | 0     | 0    | 0    |
| PRJNA275154 | SRR1798748  | Apis mellifera | single end | 2015 | NA   | 2013 | NA     | NA            | 34711889   | 0        | 0     | 0    | 0    |
| PRJNA275154 | SRR1798749  | Apis mellifera | single end | 2015 | NA   | 2013 | NA     | NA            | 27924845   | 0        | 0     | 0    | 0    |
| PRJNA275154 | SRR1798750  | Apis mellifera | single end | 2015 | NA   | 2013 | NA     | NA            | 39301839   | 0        | 0     | 0    | 0    |
| PRJNA193691 | SRR2954344  | Apis mellifera | single end | 2015 | NA   | 2013 | NA     | NA            | 218188846  | 0        | 0     | 0    | 0    |
| PRJNA193691 | SRR2954345  | Apis mellifera | single end | 2015 | NA   | 2013 | NA     | NA            | 220797918  | 0        | 0     | 1    | 0    |
| PRJNA193691 | SRR2954346  | Apis mellifera | single end | 2015 | NA   | 2013 | NA     | NA            | 215385931  | 0        | 0     | 178  | 0    |
| PRJNA498667 | SRR3476887  | Apis mellifera | single end | 2018 | 2012 | 2012 | China  | Asia          | 5945373    | 100038   | 1.68  | 1825 | 0.03 |
| PRJNA498667 | SRR3476890  | Apis mellifera | single end | 2016 | 2012 | 2012 | China  | Asia          | 5711376    | 12451    | 0.22  | 1133 | 0.02 |
| PRJNA322249 | SRR3547484  | Apis mellifera | single end | 2016 | NA   | 2014 | NA     | NA            | 90099137   | 7        | 0     | 42   | 0    |
| PRJNA322249 | SRR3547485  | Apis mellifera | single end | 2016 | NA   | 2014 | NA     | NA            | 45252474   | 0        | 0     | 3    | 0    |
| PRJNA322249 | SRR3547486  | Apis mellifera | single end | 2016 | NA   | 2014 | NA     | NA            | 91554041   | 19       | 0     | 33   | 0    |
| PRJNA322249 | SRR3547487  | Apis mellifera | single end | 2016 | NA   | 2014 | NA     | NA            | 79970252   | 0        | 0     | 45   | 0    |
| PRJNA322249 | SRR3547488  | Apis mellifera | single end | 2016 | NA   | 2014 | NA     | NA            | 81902819   | 0        | 0     | 6    | 0    |
| PRJNA322249 | SRR3547489  | Apis mellifera | single end | 2016 | NA   | 2014 | NA     | NA            | 95556493   | 1        | 0     | 65   | 0    |
| PRJNA322249 | SRR3547490  | Apis mellifera | single end | 2016 | NA   | 2014 | NA     | NA            | 73540107   | 0        | 0     | 1    | 0    |
| PRJNA322249 | SRR3547491  | Apis mellifera | single end | 2016 | NA   | 2014 | NA     | NA            | 88830782   | 0        | 0     | 10   | 0    |
| PRJNA322249 | SRR3547492  | Apis mellifera | single end | 2016 | NA   | 2014 | NA     | NA            | 99412010   | 0        | 0     | 7    | 0    |
| PRJNA322249 | SRR3547493  | Apis mellifera | single end | 2016 | NA   | 2014 | NA     | NA            | 56918065   | 0        | 0     | 0    | 0    |
| PRJNA322249 | SRR3547494  | Apis mellifera | single end | 2016 | NA   | 2014 | NA     | NA            | 72283198   | 0        | 0     | 12   | 0    |
| PRJNA325930 | SRR3675069  | Apis mellifera | single end | 2017 | NA   | 2015 | NA     | NA            | 56874766   | 95       | 0     | 0    | 0    |
| PRJNA325930 | SRR3675070  | Apis mellifera | single end | 2017 | NA   | 2015 | NA     | NA            | 52557453   | 229315   | 0.44  | 37   | 0    |
| PRJNA325930 | SRR3675071  | Apis mellifera | single end | 2017 | NA   | 2015 | NA     | NA            | 59985500   | 109      | 0     | 0    | 0    |
| PRJNA325930 | SRR3675072  | Apis mellifera | single end | 2017 | NA   | 2015 | NA     | NA            | 57108520   | 70       | 0     | 0    | 0    |
| PRJNA325930 | SRR3675073  | Apis mellifera | single end | 2017 | NA   | 2015 | NA     | NA            | 54393696   | 74       | 0     | 1    | 0    |
| PRJNA325930 | SRR3675074  | Apis mellifera | single end | 2017 | NA   | 2015 | NA     | NA            | 62617737   | 84       | 0     | 0    | 0    |
| PRJNA325930 | SRR3675076  | Apis mellifera | single end | 2017 | NA   | 2015 | NA     | NA            | 61329088   | 51       | 0     | 0    | 0    |
| PRJNA325930 | SRR3675077  | Apis mellifera | single end | 2017 | NA   | 2015 | NA     | NA            | 58679762   | 179009   | 0.31  | 38   | 0    |
| PRJNA257666 | SRR3708802  | Apis mellifera | single end | 2015 | NA   | 2013 | NA     | NA            | 3843019    | 0        | 0     | 0    | 0    |
| PRJNA257666 | SRR3708803  | Apis mellifera | single end | 2015 | NA   | 2013 | NA     | NA            | 38659603</ |          |       |      |      |

|             |            |                |            |      |    |      |     |               |          |          |       |      |      |
|-------------|------------|----------------|------------|------|----|------|-----|---------------|----------|----------|-------|------|------|
| PRJNA339620 | SRR4045684 | Apis mellifera | single end | 2017 | NA | 2015 | USA | North America | 27816174 | 43       | 0     | 0    | 0    |
| PRJNA339620 | SRR4045685 | Apis mellifera | single end | 2017 | NA | 2015 | USA | North America | 27317012 | 54       | 0     | 0    | 0    |
| PRJNA339620 | SRR4045686 | Apis mellifera | single end | 2017 | NA | 2015 | USA | North America | 29696020 | 10047    | 0.03  | 1    | 0    |
| PRJNA339620 | SRR4045687 | Apis mellifera | single end | 2017 | NA | 2015 | USA | North America | 36043172 | 9933282  | 27.56 | 748  | 0    |
| PRJNA339620 | SRR4045688 | Apis mellifera | single end | 2017 | NA | 2015 | USA | North America | 29979388 | 10423776 | 34.77 | 1563 | 0.01 |
| PRJNA339620 | SRR4045689 | Apis mellifera | single end | 2017 | NA | 2015 | USA | North America | 32404786 | 6431138  | 19.85 | 877  | 0    |
| PRJNA339620 | SRR4045690 | Apis mellifera | single end | 2017 | NA | 2015 | USA | North America | 32374092 | 38       | 0     | 0    | 0    |
| PRJNA339620 | SRR4045691 | Apis mellifera | single end | 2017 | NA | 2015 | USA | North America | 28692431 | 24       | 0     | 0    | 0    |
| PRJNA339620 | SRR4045692 | Apis mellifera | single end | 2017 | NA | 2015 | USA | North America | 30797763 | 54       | 0     | 0    | 0    |
| PRJNA339620 | SRR4045693 | Apis mellifera | single end | 2017 | NA | 2015 | USA | North America | 29308771 | 32       | 0     | 0    | 0    |
| PRJNA339620 | SRR4045694 | Apis mellifera | single end | 2017 | NA | 2015 | USA | North America | 33560237 | 2160     | 0.01  | 2    | 0    |
| PRJNA339620 | SRR4045695 | Apis mellifera | single end | 2017 | NA | 2015 | USA | North America | 38166582 | 3006426  | 7.88  | 417  | 0    |
| PRJNA339620 | SRR4045696 | Apis mellifera | single end | 2017 | NA | 2015 | USA | North America | 42718058 | 825      | 0     | 0    | 0    |
| PRJNA339620 | SRR4045697 | Apis mellifera | single end | 2017 | NA | 2015 | USA | North America | 26033309 | 27       | 0     | 0    | 0    |
| PRJNA339620 | SRR4045698 | Apis mellifera | single end | 2017 | NA | 2015 | USA | North America | 31458328 | 158      | 0     | 0    | 0    |
| PRJNA339620 | SRR4045699 | Apis mellifera | single end | 2017 | NA | 2015 | USA | North America | 30080333 | 48       | 0     | 0    | 0    |
| PRJNA339620 | SRR4045700 | Apis mellifera | single end | 2017 | NA | 2015 | USA | North America | 25532025 | 16       | 0     | 0    | 0    |
| PRJNA339620 | SRR4045701 | Apis mellifera | single end | 2017 | NA | 2015 | USA | North America | 22425405 | 28       | 0     | 0    | 0    |
| PRJNA339620 | SRR4045702 | Apis mellifera | single end | 2017 | NA | 2015 | USA | North America | 23773584 | 303      | 0     | 0    | 0    |
| PRJNA339620 | SRR4045703 | Apis mellifera | single end | 2017 | NA | 2015 | USA | North America | 23043782 | 714      | 0     | 1    | 0    |
| PRJNA339620 | SRR4045704 | Apis mellifera | single end | 2017 | NA | 2015 | USA | North America | 24513706 | 6819     | 0.03  | 0    | 0    |
| PRJNA339620 | SRR4045705 | Apis mellifera | single end | 2017 | NA | 2015 | USA | North America | 10120500 | 4        | 0     | 0    | 0    |
| PRJNA339620 | SRR4045706 | Apis mellifera | single end | 2017 | NA | 2015 | USA | North America | 20361455 | 171      | 0     | 0    | 0    |
| PRJNA339620 | SRR4045707 | Apis mellifera | single end | 2017 | NA | 2015 | USA | North America | 22184991 | 458      | 0     | 1    | 0    |
| PRJNA339620 | SRR4045708 | Apis mellifera | single end | 2017 | NA | 2015 | USA | North America | 22526533 | 83       | 0     | 0    | 0    |
| PRJNA339620 | SRR4045709 | Apis mellifera | single end | 2017 | NA | 2015 | USA | North America | 23928796 | 22       | 0     | 0    | 0    |
| PRJNA339620 | SRR4045710 | Apis mellifera | single end | 2017 | NA | 2015 | USA | North America | 21723254 | 32       | 0     | 0    | 0    |
| PRJNA339620 | SRR4045711 | Apis mellifera | single end | 2017 | NA | 2015 | USA | North America | 21572328 | 354      | 0     | 0    | 0    |
| PRJNA339620 | SRR4045712 | Apis mellifera | single end | 2017 | NA | 2015 | USA | North America | 20921751 | 3320     | 0.02  | 1    | 0    |
| PRJNA339620 | SRR4045713 | Apis mellifera | single end | 2017 | NA | 2015 | USA | North America | 26244192 | 2299757  | 8.76  | 117  | 0    |
| PRJNA339620 | SRR4045714 | Apis mellifera | single end | 2017 | NA | 2015 | USA | North America | 22539652 | 4704     | 0.02  | 2    | 0    |
| PRJNA339620 | SRR4045715 | Apis mellifera | single end | 2017 | NA | 2015 | USA | North America | 23057810 | 2980305  | 12.93 | 413  | 0    |
| PRJNA339620 | SRR4045716 | Apis mellifera | single end | 2017 | NA | 2015 | USA | North America | 23647365 | 6320637  | 26.73 | 238  | 0    |
| PRJNA339620 | SRR4045717 | Apis mellifera | single end | 2017 | NA | 2015 | USA | North America | 23782249 | 3952     | 0.02  | 1    | 0    |
| PRJNA339620 | SRR4045718 | Apis mellifera | single end | 2017 | NA | 2015 | USA | North America | 25567748 | 1685     | 0.01  | 2    | 0    |
| PRJNA339620 | SRR4045719 | Apis mellifera | single end | 2017 | NA | 2015 | USA | North America | 22335525 | 838      | 0     | 1    | 0    |
| PRJNA339620 | SRR4045720 | Apis mellifera | single end | 2017 | NA | 2015 | USA | North America | 33645655 | 1182     | 0     | 1    | 0    |
| PRJNA339620 | SRR4045721 | Apis mellifera | single end | 2017 | NA | 2015 | USA | North America | 28581249 | 50       | 0     | 0    | 0    |
| PRJNA339620 | SRR4045722 | Apis mellifera | single end | 2017 | NA | 2015 | USA | North America | 29987204 | 6        | 0     | 0    | 0    |
| PRJNA339620 | SRR4045723 | Apis mellifera | single end | 2017 | NA | 2015 | USA | North America | 33709363 | 17       | 0     | 0    | 0    |
| PRJNA339620 | SRR4045724 | Apis mellifera | single end | 2017 | NA | 2015 | USA | North America | 28524394 | 1333     | 0     | 3    | 0    |
| PRJNA339620 | SRR4045725 | Apis mellifera | single end | 2017 | NA | 2015 | USA | North America | 34583407 | 4350     | 0.01  | 2    | 0    |
| PRJNA339620 | SRR4045726 | Apis mellifera | single end | 2017 | NA | 2015 | USA | North America | 24738968 | 3317813  | 13.41 | 241  | 0    |
| PRJNA339620 | SRR4045727 | Apis mellifera | single end | 2017 | NA | 2015 | USA | North America | 33450301 | 4953     | 0.01  | 4    | 0    |
| PRJNA339620 | SRR4045728 | Apis mellifera | single end | 2017 | NA | 2015 | USA | North America | 36080932 | 8061     | 0.02  | 2    | 0    |
| PRJNA339620 | SRR4045729 | Apis mellifera | single end | 2017 | NA | 2015 | USA | North America | 28953353 | 182      | 0     | 0    | 0    |
| PRJNA339620 | SRR4045730 | Apis mellifera | single end | 2017 | NA | 2015 | USA | North America | 21878414 | 310      | 0     | 1    | 0    |
| PRJNA339620 | SRR4045731 | Apis mellifera | single end | 2017 | NA | 2015 | USA | North America | 20329527 | 10       | 0     | 0    | 0    |
| PRJNA339620 | SRR4045732 | Apis mellifera | single end | 2017 | NA | 2015 | USA | North America | 21963871 | 345      | 0     | 0    | 0    |
| PRJNA339620 | SRR4045733 | Apis mellifera | single end | 2017 | NA | 2015 | USA | North America | 21628165 | 462      | 0     | 0    | 0    |
| PRJNA339620 | SRR4045734 | Apis mellifera | single end | 2017 | NA | 2015 | USA | North America | 25566735 | 9        | 0     | 0    | 0    |
| PRJNA339620 | SRR4045735 | Apis mellifera | single end | 2017 | NA | 2015 | USA | North America | 23109233 | 4        | 0     | 0    | 0    |
| PRJNA339620 | SRR4045736 | Apis mellifera | single end | 2017 | NA | 2015 | USA | North America | 28728276 | 873      | 0     | 0    | 0    |
| PRJNA339620 | SRR4045737 | Apis mellifera | single end | 2017 | NA | 2015 | USA | North America | 22448394 | 504      | 0     | 0    | 0    |
| PRJNA339620 | SRR4045738 | Apis mellifera | single end | 2017 | NA | 2015 | USA | North America | 26696562 | 309      | 0     | 0    | 0    |
| PRJNA339620 | SRR4045739 | Apis mellifera | single end | 2017 | NA | 2015 | USA | North America | 24092159 | 61       | 0     | 0    | 0    |
| PRJNA339620 | SRR4045740 | Apis mellifera | single end | 2017 | NA | 2015 | USA | North America | 21771668 | 831      | 0     | 1    | 0    |
| PRJNA339620 | SRR4045741 | Apis mellifera | single end | 2017 | NA | 2015 | USA | North America | 20308157 | 1056     | 0.01  | 1    | 0    |
| PRJNA339620 | SRR4045742 | Apis mellifera | single end | 2017 | NA | 2015 | USA | North America | 22471944 | 438      | 0     | 0    | 0    |
| PRJNA339620 | SRR4045743 | Apis mellifera | single end | 2017 | NA | 2015 | USA | North America | 22510273 | 517      | 0     | 0    | 0    |
| PRJNA339620 | SRR4045744 | Apis mellifera | single end | 2017 | NA | 2015 | USA | North America | 23241736 | 2369321  | 10.19 | 130  | 0    |
| PRJNA339620 | SRR4045745 | Apis mellifera | single end | 2017 | NA | 2015 | USA | North America | 20328688 | 5353137  | 26.33 | 235  | 0    |
| PRJNA339620 | SRR4045746 | Apis mellifera | single end | 2017 | NA | 2015 | USA | North America | 21501956 | 5193271  | 24.15 | 333  | 0    |
| PRJNA339620 | SRR4045747 | Apis mellifera | single end | 2017 | NA | 2015 | USA | North America | 20052798 | 2199     | 0.01  | 1    | 0    |
| PRJNA339620 | SRR4045748 | Apis mellifera | single end | 2017 | NA | 2015 | USA | North America | 29450687 | 5444421  | 18.49 | 445  | 0    |
| PRJNA339620 | SRR4045749 | Apis mellifera | single end | 2017 | NA | 2015 | USA | North America | 33249676 | 5708     | 0.02  | 0    | 0    |
| PRJNA339620 | SRR4045750 | Apis mellifera | single end | 2017 | NA | 2015 | USA | North America | 28276111 | 15       | 0     | 0    | 0    |
| PRJNA339620 | SRR4045751 | Apis mellifera | single end | 2017 | NA | 2015 | USA | North America | 26518377 | 4        | 0     | 0    | 0    |
| PRJNA339620 | SRR4045752 | Apis mellifera | single end | 2017 | NA | 2015 | USA | North America | 26773549 | 1506     | 0.01  | 2    | 0    |
| PRJNA339620 | SRR4045753 | Apis mellifera | single end | 2017 | NA | 2015 | USA | North America | 27036524 | 2699     | 0.01  | 3    | 0    |
| PRJNA339620 | SRR4045754 | Apis mellifera | single end | 2017 | NA | 2015 | USA | North America | 25380280 | 3460252  | 13.63 | 590  | 0    |
| PRJNA339620 | SRR4045755 | Apis mellifera | single end | 2017 | NA | 2015 | USA | North America | 27331060 | 3282     | 0.01  | 3    | 0    |
| PRJNA339620 | SRR4045756 | Apis mellifera | single end | 2017 | NA | 2015 | USA | North America | 27778478 | 677      | 0     | 0    | 0    |
| PRJNA339620 | SRR4045757 | Apis mellifera | single end | 2017 | NA | 2015 | USA | North America | 25760719 | 109      | 0     | 0    | 0    |
| PRJNA339620 | SRR4045758 | Apis mellifera | single end | 2017 | NA | 2015 | USA | North America | 27464042 | 29       | 0     | 0    | 0    |
| PRJNA339620 | SRR4045759 | Apis mellifera | single end | 2017 | NA | 2015 | USA | North America | 30536091 | 80       | 0     | 0    | 0    |
| PRJNA339620 | SRR4045760 | Apis mellifera | single end | 2017 | NA | 2015 | USA | North America | 25481566 | 215      | 0     | 0    | 0    |
| PRJNA339620 | SRR4045761 | Apis mellifera | single end | 2017 | NA | 2015 | USA | North America | 29027604 | 510      | 0     | 0    | 0    |
| PRJNA339620 | SRR4045762 | Apis mellifera | single end | 2017 | NA | 2015 | USA | North America | 24759954 | 12       | 0     | 0    | 0    |
| PRJNA339620 | SRR4045763 | Apis mellifera | single end | 2017 | NA | 2015 | USA | North America | 20880191 | 11       | 0     | 0    | 0    |
| PRJNA339620 | SRR4045764 | Apis mellifera | single end | 2017 | NA | 2015 | USA | North America | 27342607 | 1738002  | 6.36  | 145  | 0    |
| PRJNA339620 | SRR4045765 | Apis mellifera | single end | 2017 | NA | 2015 | USA | North America | 24541824 | 503      | 0     | 0    | 0    |
| PRJNA339620 | SRR4045766 | Apis mellifera | single end | 2017 | NA | 2015 | USA | North America | 25435347 | 304      | 0     | 0    | 0    |
| PRJNA339620 | SRR4045767 | Apis mellifera | single end | 2017 | NA | 2015 | USA | North America | 23134547 | 45       | 0     | 0    | 0    |
| PRJNA339620 | SRR4045768 | Apis mellifera | single end | 2017 | NA | 2015 | USA | North America | 22337298 | 304      | 0     | 0    | 0    |
| PRJNA339620 | SRR4045769 | Apis mellifera | single end | 2017 | NA | 2015 | USA | North America | 24305214 | 506      | 0     | 0    | 0    |
| PRJNA339620 | SRR4045770 | Apis mellifera | single end | 2017 | NA | 2015 | USA | North America | 23152192 | 3614     | 0.02  | 3    | 0    |
| PRJNA339620 | SRR4045771 | Apis mellifera | single end | 2017 | NA | 2015 | USA | North America | 26723770 | 7768562  | 29.07 | 1475 | 0.01 |
| PRJNA339620 | SRR4045772 | Apis mellifera | single end | 2017 | NA | 2015 | USA | North America | 27411756 | 1202     | 0     | 2    | 0    |
| PRJNA339620 | SRR4045773 | Apis mellifera | single end | 2017 | NA | 2015 | USA | North America | 22201144 | 99       | 0     | 0    | 0    |
| PRJNA339620 | SRR4045774 | Apis mellifera | single end | 2017 | NA | 2015 | USA | North America | 22521482 | 95       | 0     | 0    | 0    |
| PRJNA339620 | SRR4045775 | Apis mellifera | single end | 2017 | NA | 2015 | USA | North America | 21501481 | 1287     | 0.01  | 0    | 0    |
| PRJNA339620 | SRR4045776 | Apis mellifera | single end | 2017 | NA | 2015 | USA | North America | 31291119 | 7654     | 0.02  | 0    | 0    |
| PRJNA339620 | SRR4045777 | Apis mellifera | single end | 2017 | NA | 2015 | USA | North America | 32606578 | 10800    | 0.03  | 4    | 0    |
| PRJNA339620 | SRR4045778 | Apis mellifera | single end | 2017 | NA | 2015 | USA | North America | 29155184 | 7388136  | 25.34 | 661  | 0    |
| PRJNA339620 | SRR4045779 | Apis mellifera | single end | 2017 | NA | 2015 | USA | North America | 31092940 | 7246043  | 23.3  | 1067 | 0    |
| PRJNA339620 | SRR4045780 | Apis mellifera | single end | 2017 | NA | 2015 | USA | North America | 30581426 | 16       | 0     | 0    | 0    |
| PRJNA339620 | SRR4045781 | Apis mellifera | single end | 2017 | NA |      |     |               |          |          |       |      |      |

|             |            |                |            |      |    |      |     |               |          |         |       |         |       |
|-------------|------------|----------------|------------|------|----|------|-----|---------------|----------|---------|-------|---------|-------|
| PRJNA339620 | SRR4045790 | Apis mellifera | single end | 2017 | NA | 2015 | USA | North America | 26270064 | 87      | 0     | 0       | 0     |
| PRJNA339620 | SRR4045791 | Apis mellifera | single end | 2017 | NA | 2015 | USA | North America | 26227162 | 0       | 0     | 0       | 0     |
| PRJNA339620 | SRR4045792 | Apis mellifera | single end | 2017 | NA | 2015 | USA | North America | 27410545 | 342     | 0     | 0       | 0     |
| PRJNA339620 | SRR4045793 | Apis mellifera | single end | 2017 | NA | 2015 | USA | North America | 25910325 | 415     | 0     | 0       | 0     |
| PRJNA339620 | SRR4045794 | Apis mellifera | single end | 2017 | NA | 2015 | USA | North America | 25389005 | 345     | 0     | 1       | 0     |
| PRJNA339620 | SRR4045795 | Apis mellifera | single end | 2017 | NA | 2015 | USA | North America | 26082779 | 13      | 0     | 0       | 0     |
| PRJNA339620 | SRR4045796 | Apis mellifera | single end | 2017 | NA | 2015 | USA | North America | 23057857 | 193     | 0     | 0       | 0     |
| PRJNA339620 | SRR4045797 | Apis mellifera | single end | 2017 | NA | 2015 | USA | North America | 22564446 | 484     | 0     | 0       | 0     |
| PRJNA339620 | SRR4045798 | Apis mellifera | single end | 2017 | NA | 2015 | USA | North America | 23314366 | 334     | 0     | 0       | 0     |
| PRJNA339620 | SRR4045799 | Apis mellifera | single end | 2017 | NA | 2015 | USA | North America | 22177390 | 59      | 0     | 0       | 0     |
| PRJNA339620 | SRR4045800 | Apis mellifera | single end | 2017 | NA | 2015 | USA | North America | 23373880 | 338     | 0     | 0       | 0     |
| PRJNA339620 | SRR4045801 | Apis mellifera | single end | 2017 | NA | 2015 | USA | North America | 22902366 | 337     | 0     | 0       | 0     |
| PRJNA339620 | SRR4045802 | Apis mellifera | single end | 2017 | NA | 2015 | USA | North America | 22585146 | 970     | 0     | 0       | 0     |
| PRJNA339620 | SRR4045803 | Apis mellifera | single end | 2017 | NA | 2015 | USA | North America | 22871493 | 3452    | 0.02  | 1       | 0     |
| PRJNA339620 | SRR4045804 | Apis mellifera | single end | 2017 | NA | 2015 | USA | North America | 22971274 | 1149871 | 5.01  | 221     | 0     |
| PRJNA339620 | SRR4045805 | Apis mellifera | single end | 2017 | NA | 2015 | USA | North America | 22034114 | 4837    | 0.02  | 0       | 0     |
| PRJNA339620 | SRR4045806 | Apis mellifera | single end | 2017 | NA | 2015 | USA | North America | 21392104 | 2101    | 0.01  | 0       | 0     |
| PRJNA339620 | SRR4045807 | Apis mellifera | single end | 2017 | NA | 2015 | USA | North America | 24012070 | 1002    | 0     | 1       | 0     |
| PRJNA339620 | SRR4045808 | Apis mellifera | single end | 2017 | NA | 2015 | USA | North America | 21899167 | 1125    | 0.01  | 0       | 0     |
| PRJNA339620 | SRR4045809 | Apis mellifera | single end | 2017 | NA | 2015 | USA | North America | 22302943 | 3695348 | 16.57 | 564     | 0     |
| PRJNA339620 | SRR4045810 | Apis mellifera | single end | 2017 | NA | 2015 | USA | North America | 28194072 | 1148    | 0     | 1       | 0     |
| PRJNA339620 | SRR4045811 | Apis mellifera | single end | 2017 | NA | 2015 | USA | North America | 26795839 | 46      | 0     | 0       | 0     |
| PRJNA339620 | SRR4045812 | Apis mellifera | single end | 2017 | NA | 2015 | USA | North America | 26813133 | 7       | 0     | 0       | 0     |
| PRJNA339620 | SRR4045813 | Apis mellifera | single end | 2017 | NA | 2015 | USA | North America | 30057746 | 8       | 0     | 0       | 0     |
| PRJNA339620 | SRR4045814 | Apis mellifera | single end | 2017 | NA | 2015 | USA | North America | 30793267 | 1676    | 0.01  | 1       | 0     |
| PRJNA339620 | SRR4045815 | Apis mellifera | single end | 2017 | NA | 2015 | USA | North America | 34129168 | 3018    | 0.01  | 3       | 0     |
| PRJNA339620 | SRR4045816 | Apis mellifera | single end | 2017 | NA | 2015 | USA | North America | 28817133 | 3295    | 0.01  | 2       | 0     |
| PRJNA339620 | SRR4045817 | Apis mellifera | single end | 2017 | NA | 2015 | USA | North America | 36630518 | 11091   | 0.03  | 7       | 0     |
| PRJNA339620 | SRR4045818 | Apis mellifera | single end | 2017 | NA | 2015 | USA | North America | 35143427 | 6411896 | 18.24 | 884     | 0     |
| PRJNA339620 | SRR4045819 | Apis mellifera | single end | 2017 | NA | 2015 | USA | North America | 31223453 | 56      | 0     | 0       | 0     |
| PRJNA339620 | SRR4045820 | Apis mellifera | single end | 2017 | NA | 2015 | USA | North America | 22792720 | 3567362 | 15.65 | 81      | 0     |
| PRJNA339620 | SRR4045821 | Apis mellifera | single end | 2017 | NA | 2015 | USA | North America | 21125678 | 50      | 0     | 0       | 0     |
| PRJNA339620 | SRR4045822 | Apis mellifera | single end | 2017 | NA | 2015 | USA | North America | 22380924 | 222     | 0     | 0       | 0     |
| PRJNA339620 | SRR4045823 | Apis mellifera | single end | 2017 | NA | 2015 | USA | North America | 20966792 | 560     | 0     | 1       | 0     |
| PRJNA339620 | SRR4045824 | Apis mellifera | single end | 2017 | NA | 2015 | USA | North America | 24485910 | 272     | 0     | 0       | 0     |
| PRJNA339620 | SRR4045825 | Apis mellifera | single end | 2017 | NA | 2015 | USA | North America | 22692026 | 21      | 0     | 0       | 0     |
| PRJNA339620 | SRR4045826 | Apis mellifera | single end | 2017 | NA | 2015 | USA | North America | 21012665 | 375     | 0     | 1       | 0     |
| PRJNA339620 | SRR4045827 | Apis mellifera | single end | 2017 | NA | 2015 | USA | North America | 23437807 | 393     | 0     | 0       | 0     |
| PRJNA339620 | SRR4045828 | Apis mellifera | single end | 2017 | NA | 2015 | USA | North America | 22529015 | 274     | 0     | 0       | 0     |
| PRJNA339620 | SRR4045829 | Apis mellifera | single end | 2017 | NA | 2015 | USA | North America | 20458054 | 1       | 0     | 0       | 0     |
| PRJNA339620 | SRR4045830 | Apis mellifera | single end | 2017 | NA | 2015 | USA | North America | 23719911 | 3945688 | 16.63 | 228     | 0     |
| PRJNA339620 | SRR4045831 | Apis mellifera | single end | 2017 | NA | 2015 | USA | North America | 23014376 | 5746    | 0.02  | 0       | 0     |
| PRJNA339620 | SRR4045832 | Apis mellifera | single end | 2017 | NA | 2015 | USA | North America | 24236724 | 549     | 0     | 1       | 0     |
| PRJNA339620 | SRR4045833 | Apis mellifera | single end | 2017 | NA | 2015 | USA | North America | 23899689 | 1039    | 0     | 1       | 0     |
| PRJNA339620 | SRR4045834 | Apis mellifera | single end | 2017 | NA | 2015 | USA | North America | 22859426 | 2771    | 0.01  | 1       | 0     |
| PRJNA339620 | SRR4045835 | Apis mellifera | single end | 2017 | NA | 2015 | USA | North America | 26595749 | 40373   | 0.15  | 4       | 0     |
| PRJNA339620 | SRR4045836 | Apis mellifera | single end | 2017 | NA | 2015 | USA | North America | 10608814 | 2060    | 0.02  | 0       | 0     |
| PRJNA339620 | SRR4045837 | Apis mellifera | single end | 2017 | NA | 2015 | USA | North America | 22628346 | 3017265 | 13.33 | 131     | 0     |
| PRJNA339620 | SRR4045838 | Apis mellifera | single end | 2017 | NA | 2015 | USA | North America | 26406366 | 5723405 | 21.67 | 481     | 0     |
| PRJNA339620 | SRR4045839 | Apis mellifera | single end | 2017 | NA | 2015 | USA | North America | 30036919 | 7303205 | 24.31 | 733     | 0     |
| PRJNA339620 | SRR4045840 | Apis mellifera | single end | 2017 | NA | 2015 | USA | North America | 29912453 | 65      | 0     | 0       | 0     |
| PRJNA339620 | SRR4045841 | Apis mellifera | single end | 2017 | NA | 2015 | USA | North America | 33452787 | 5       | 0     | 0       | 0     |
| PRJNA339620 | SRR4045842 | Apis mellifera | single end | 2017 | NA | 2015 | USA | North America | 16463300 | 757     | 0     | 1       | 0     |
| PRJNA339620 | SRR4045843 | Apis mellifera | single end | 2017 | NA | 2015 | USA | North America | 30189296 | 3194    | 0.01  | 2       | 0     |
| PRJNA339620 | SRR4045844 | Apis mellifera | single end | 2017 | NA | 2015 | USA | North America | 26216431 | 7477    | 0.03  | 5       | 0     |
| PRJNA339620 | SRR4045845 | Apis mellifera | single end | 2017 | NA | 2015 | USA | North America | 29282020 | 4118    | 0.01  | 2       | 0     |
| PRJNA339620 | SRR4045846 | Apis mellifera | single end | 2017 | NA | 2015 | USA | North America | 28228172 | 896     | 0     | 0       | 0     |
| PRJNA339620 | SRR4045847 | Apis mellifera | single end | 2017 | NA | 2015 | USA | North America | 26988204 | 131     | 0     | 0       | 0     |
| PRJNA339620 | SRR4045848 | Apis mellifera | single end | 2017 | NA | 2015 | USA | North America | 29062242 | 25      | 0     | 0       | 0     |
| PRJNA339620 | SRR4045849 | Apis mellifera | single end | 2017 | NA | 2015 | USA | North America | 30614879 | 1003    | 0     | 0       | 0     |
| PRJNA339620 | SRR4045850 | Apis mellifera | single end | 2017 | NA | 2015 | USA | North America | 25320385 | 2034778 | 8.04  | 164     | 0     |
| PRJNA339620 | SRR4045851 | Apis mellifera | single end | 2017 | NA | 2015 | USA | North America | 21930832 | 509     | 0     | 0       | 0     |
| PRJNA339620 | SRR4045852 | Apis mellifera | single end | 2017 | NA | 2015 | USA | North America | 23805938 | 39      | 0     | 0       | 0     |
| PRJNA339620 | SRR4045853 | Apis mellifera | single end | 2017 | NA | 2015 | USA | North America | 21984880 | 12      | 0     | 0       | 0     |
| PRJNA339620 | SRR4045854 | Apis mellifera | single end | 2017 | NA | 2015 | USA | North America | 24910807 | 1092    | 0     | 2       | 0     |
| PRJNA339620 | SRR4045855 | Apis mellifera | single end | 2017 | NA | 2015 | USA | North America | 23081864 | 4728158 | 20.48 | 338     | 0     |
| PRJNA339620 | SRR4045856 | Apis mellifera | single end | 2017 | NA | 2015 | USA | North America | 26249109 | 362     | 0     | 0       | 0     |
| PRJNA339620 | SRR4045857 | Apis mellifera | single end | 2017 | NA | 2015 | USA | North America | 24024322 | 95      | 0     | 0       | 0     |
| PRJNA339620 | SRR4045858 | Apis mellifera | single end | 2017 | NA | 2015 | USA | North America | 25678839 | 331     | 0     | 0       | 0     |
| PRJNA339620 | SRR4045859 | Apis mellifera | single end | 2017 | NA | 2015 | USA | North America | 23881467 | 4453648 | 18.65 | 91      | 0     |
| PRJNA343198 | SRR4250143 | Apis mellifera | single end | 2017 | NA | 2015 | USA | North America | 30571929 | 78      | 0     | 2246398 | 7.35  |
| PRJNA343198 | SRR4250144 | Apis mellifera | single end | 2017 | NA | 2015 | USA | North America | 34124835 | 19      | 0     | 9026    | 0.03  |
| PRJNA343198 | SRR4250145 | Apis mellifera | single end | 2017 | NA | 2015 | USA | North America | 34257986 | 58      | 0     | 3642730 | 10.63 |
| PRJNA343198 | SRR4250146 | Apis mellifera | single end | 2017 | NA | 2015 | USA | North America | 33010279 | 1876    | 0.01  | 812     | 0     |
| PRJNA343198 | SRR4250147 | Apis mellifera | single end | 2017 | NA | 2015 | USA | North America | 34018660 | 1337    | 0     | 427     | 0     |
| PRJNA343198 | SRR4250148 | Apis mellifera | single end | 2017 | NA | 2015 | USA | North America | 32658223 | 166     | 0     | 611     | 0     |
| PRJNA343198 | SRR4250149 | Apis mellifera | single end | 2017 | NA | 2015 | USA | North America | 33765225 | 968     | 0     | 442     | 0     |
| PRJNA343198 | SRR4250150 | Apis mellifera | single end | 2017 | NA | 2015 | USA | North America | 31241970 | 25      | 0     | 328     | 0     |
| PRJNA343198 | SRR4250151 | Apis mellifera | single end | 2017 | NA | 2015 | USA | North America | 35247249 | 8       | 0     | 1291    | 0     |
| PRJNA343198 | SRR4250152 | Apis mellifera | single end | 2017 | NA | 2015 | USA | North America | 49255298 | 26      | 0     | 1720663 | 3.49  |
| PRJNA343198 | SRR4250153 | Apis mellifera | single end | 2017 | NA | 2015 | USA | North America | 43815220 | 28      | 0     | 314     | 0     |
| PRJNA343198 | SRR4250154 | Apis mellifera | single end | 2017 | NA | 2015 | USA | North America | 40088056 | 19      | 0     | 732     | 0     |
| PRJNA343198 | SRR4250155 | Apis mellifera | single end | 2017 | NA | 2015 | USA | North America | 33989685 | 1       | 0     | 596     | 0     |
| PRJNA343198 | SRR4250156 | Apis mellifera | single end | 2017 | NA | 2015 | USA | North America | 32299680 | 98      | 0     | 490     | 0     |
| PRJNA343198 | SRR4250157 | Apis mellifera | single end | 2017 | NA | 2015 | USA | North America | 33513685 | 14      | 0     | 668     | 0     |
| PRJNA343198 | SRR4250158 | Apis mellifera | single end | 2017 | NA | 2015 | USA | North America | 31337198 | 12      | 0     | 1178604 | 3.76  |
| PRJNA343198 | SRR4250159 | Apis mellifera | single end | 2017 | NA | 2015 | USA | North America | 35441644 | 0       | 0     | 858     | 0     |
| PRJNA343198 | SRR4250160 | Apis mellifera | single end | 2017 | NA | 2015 | USA | North America | 34320201 | 0       | 0     | 1019    | 0     |
| PRJNA343198 | SRR4250161 | Apis mellifera | single end | 2017 | NA | 2015 | USA | North America | 33093668 | 23      | 0     | 1025484 | 3.1   |
| PRJNA343198 | SRR4250162 | Apis mellifera | single end | 2017 | NA | 2015 | USA | North America | 32343273 | 1       | 0     | 710     | 0     |
| PRJNA343198 | SRR4250163 | Apis mellifera | single end | 2017 | NA | 2015 | USA | North America | 28489152 | 1       | 0     | 2132    | 0.01  |
| PRJNA343198 | SRR4250164 | Apis mellifera | single end | 2017 | NA | 2015 | USA | North America | 33286424 | 20      | 0     | 1567996 | 4.71  |
| PRJNA343198 | SRR4250165 | Apis mellifera | single end | 2017 | NA | 2015 | USA | North America | 32155302 | 0       | 0     | 1494    | 0     |
| PRJNA343198 | SRR4250166 | Apis mellifera | single end | 2017 | NA | 2015 | USA | North America | 31472915 | 22      | 0     | 2173636 | 6.91  |
| PRJNA343198 | SRR4250167 | Apis mellifera | single end | 2017 | NA | 2015 | USA | North America | 32519337 | 8       | 0     | 2476    | 0.01  |
| PRJNA343198 | SRR4250168 | Apis mellifera | single end | 2017 | NA | 2015 | USA | North America | 39067226 | 0       | 0     | 3364    | 0.01  |
| PRJNA343198 | SRR4250169 | Apis mellifera | single end | 2017 | NA | 2015 | USA | North America | 30507741 | 11      | 0     | 1261995 | 4.14  |
| PRJNA343198 | SRR4250170 | Apis           |            |      |    |      |     |               |          |         |       |         |       |

|             |            |                |            |      |      |      |             |               |          |          |       |         |       |
|-------------|------------|----------------|------------|------|------|------|-------------|---------------|----------|----------|-------|---------|-------|
| PRJNA343067 | SRR4292727 | Apis mellifera | single end | 2017 | 2014 | 2014 | Switzerland | Europe        | 31089426 | 0        | 0     | 493     | 0     |
| PRJNA343067 | SRR4292728 | Apis mellifera | single end | 2017 | 2014 | 2014 | Switzerland | Europe        | 36702743 | 695      | 0     | 8848913 | 24.11 |
| PRJNA343067 | SRR4292729 | Apis mellifera | single end | 2017 | 2014 | 2014 | Switzerland | Europe        | 31634609 | 4        | 0     | 812     | 0     |
| PRJNA343067 | SRR4292730 | Apis mellifera | single end | 2017 | 2014 | 2014 | Switzerland | Europe        | 31436644 | 3        | 0     | 1323    | 0     |
| PRJNA343067 | SRR4292731 | Apis mellifera | single end | 2017 | 2014 | 2014 | Switzerland | Europe        | 33943085 | 1        | 0     | 549     | 0     |
| PRJNA343067 | SRR4292732 | Apis mellifera | single end | 2017 | 2014 | 2014 | Switzerland | Europe        | 38764197 | 47       | 0     | 168734  | 0.44  |
| PRJNA343067 | SRR4292733 | Apis mellifera | single end | 2017 | 2014 | 2014 | Switzerland | Europe        | 33504650 | 4        | 0     | 1690    | 0.01  |
| PRJNA343067 | SRR4292734 | Apis mellifera | single end | 2017 | 2014 | 2014 | Switzerland | Europe        | 38163413 | 1        | 0     | 934     | 0     |
| PRJNA343067 | SRR4292735 | Apis mellifera | single end | 2017 | 2014 | 2014 | Switzerland | Europe        | 31107356 | 1        | 0     | 309     | 0     |
| PRJNA343067 | SRR4292736 | Apis mellifera | single end | 2017 | 2014 | 2014 | Switzerland | Europe        | 34795526 | 1        | 0     | 444     | 0     |
| PRJNA343067 | SRR4292737 | Apis mellifera | single end | 2017 | 2014 | 2014 | Switzerland | Europe        | 36067838 | 1        | 0     | 395     | 0     |
| PRJNA343067 | SRR4292738 | Apis mellifera | single end | 2017 | 2014 | 2014 | Switzerland | Europe        | 35894741 | 3        | 0     | 942     | 0     |
| PRJNA343067 | SRR4292739 | Apis mellifera | single end | 2017 | 2014 | 2014 | Switzerland | Europe        | 37887662 | 2        | 0     | 562     | 0     |
| PRJNA343067 | SRR4292740 | Apis mellifera | single end | 2017 | 2014 | 2014 | Switzerland | Europe        | 39703796 | 1        | 0     | 842     | 0     |
| PRJNA343067 | SRR4292741 | Apis mellifera | single end | 2017 | 2014 | 2014 | Switzerland | Europe        | 38352716 | 1        | 0     | 440     | 0     |
| PRJNA345404 | SRR4343845 | Apis mellifera | single end | 2017 | NA   | 2015 | NA          | NA            | 8432479  | 1        | 0     | 392     | 0     |
| PRJNA345404 | SRR4343846 | Apis mellifera | single end | 2017 | NA   | 2015 | NA          | NA            | 7690777  | 0        | 0     | 111     | 0     |
| PRJNA352995 | SRR5008279 | Apis mellifera | single end | 2016 | 2015 | 2015 | Czech       | Europe        | 74933    | 0        | 0     | 0       | 0     |
| PRJNA352995 | SRR5008280 | Apis mellifera | single end | 2016 | 2015 | 2015 | Czech       | Europe        | 84691    | 0        | 0     | 0       | 0     |
| PRJNA352995 | SRR5008281 | Apis mellifera | single end | 2016 | 2015 | 2015 | Czech       | Europe        | 74589    | 0        | 0     | 0       | 0     |
| PRJNA352995 | SRR5008282 | Apis mellifera | single end | 2016 | 2015 | 2015 | Czech       | Europe        | 80279    | 0        | 0     | 0       | 0     |
| PRJNA352995 | SRR5008283 | Apis mellifera | single end | 2016 | 2015 | 2015 | Czech       | Europe        | 74280    | 0        | 0     | 0       | 0     |
| PRJNA352995 | SRR5008284 | Apis mellifera | single end | 2016 | 2015 | 2015 | Czech       | Europe        | 75094    | 0        | 0     | 0       | 0     |
| PRJNA352995 | SRR5008285 | Apis mellifera | single end | 2016 | 2015 | 2015 | Czech       | Europe        | 71685    | 0        | 0     | 0       | 0     |
| PRJNA352995 | SRR5008286 | Apis mellifera | single end | 2016 | 2015 | 2015 | Czech       | Europe        | 79445    | 0        | 0     | 0       | 0     |
| PRJNA352995 | SRR5008287 | Apis mellifera | single end | 2016 | 2015 | 2015 | Czech       | Europe        | 43402    | 0        | 0     | 0       | 0     |
| PRJNA352995 | SRR5008288 | Apis mellifera | single end | 2016 | 2015 | 2015 | Czech       | Europe        | 50198    | 0        | 0     | 0       | 0     |
| PRJNA352995 | SRR5008289 | Apis mellifera | single end | 2016 | 2015 | 2015 | Czech       | Europe        | 50119    | 0        | 0     | 0       | 0     |
| PRJNA352995 | SRR5008290 | Apis mellifera | single end | 2016 | 2015 | 2015 | Czech       | Europe        | 84012    | 0        | 0     | 0       | 0     |
| PRJNA352995 | SRR5008291 | Apis mellifera | single end | 2016 | 2015 | 2015 | Czech       | Europe        | 79607    | 0        | 0     | 0       | 0     |
| PRJNA352995 | SRR5008292 | Apis mellifera | single end | 2016 | 2015 | 2015 | Czech       | Europe        | 99630    | 0        | 0     | 0       | 0     |
| PRJNA352995 | SRR5008293 | Apis mellifera | single end | 2016 | 2015 | 2015 | Czech       | Europe        | 76032    | 0        | 0     | 0       | 0     |
| PRJNA352995 | SRR5008294 | Apis mellifera | single end | 2016 | 2015 | 2015 | Czech       | Europe        | 66403    | 0        | 0     | 0       | 0     |
| PRJNA352995 | SRR5008295 | Apis mellifera | single end | 2016 | 2015 | 2015 | Czech       | Europe        | 66525    | 0        | 0     | 0       | 0     |
| PRJNA352995 | SRR5008296 | Apis mellifera | single end | 2016 | 2014 | 2014 | Czech       | Europe        | 70984    | 0        | 0     | 0       | 0     |
| PRJNA352995 | SRR5008297 | Apis mellifera | single end | 2016 | 2015 | 2015 | Czech       | Europe        | 82509    | 0        | 0     | 0       | 0     |
| PRJNA352995 | SRR5008298 | Apis mellifera | single end | 2016 | 2015 | 2015 | Czech       | Europe        | 68516    | 0        | 0     | 0       | 0     |
| PRJNA352995 | SRR5008299 | Apis mellifera | single end | 2016 | 2015 | 2015 | Czech       | Europe        | 78363    | 0        | 0     | 0       | 0     |
| PRJNA352995 | SRR5008300 | Apis mellifera | single end | 2016 | 2015 | 2015 | Czech       | Europe        | 83722    | 0        | 0     | 0       | 0     |
| PRJNA352995 | SRR5008301 | Apis mellifera | single end | 2016 | 2015 | 2015 | Czech       | Europe        | 80391    | 0        | 0     | 0       | 0     |
| PRJNA352995 | SRR5008302 | Apis mellifera | single end | 2016 | 2015 | 2015 | Czech       | Europe        | 81750    | 0        | 0     | 0       | 0     |
| PRJNA352995 | SRR5008303 | Apis mellifera | single end | 2016 | 2015 | 2015 | Czech       | Europe        | 67562    | 0        | 0     | 0       | 0     |
| PRJNA352995 | SRR5008304 | Apis mellifera | single end | 2016 | 2015 | 2015 | Czech       | Europe        | 78084    | 0        | 0     | 0       | 0     |
| PRJNA352995 | SRR5008305 | Apis mellifera | single end | 2016 | 2015 | 2015 | Czech       | Europe        | 71795    | 0        | 0     | 0       | 0     |
| PRJNA352995 | SRR5008306 | Apis mellifera | single end | 2016 | 2015 | 2015 | Czech       | Europe        | 14509    | 0        | 0     | 0       | 0     |
| PRJNA352995 | SRR5008307 | Apis mellifera | single end | 2016 | 2015 | 2015 | Czech       | Europe        | 79226    | 0        | 0     | 0       | 0     |
| PRJNA352995 | SRR5008308 | Apis mellifera | single end | 2016 | 2015 | 2015 | Czech       | Europe        | 89096    | 0        | 0     | 0       | 0     |
| PRJNA352995 | SRR5008309 | Apis mellifera | single end | 2016 | 2015 | 2015 | Czech       | Europe        | 62163    | 0        | 0     | 0       | 0     |
| PRJNA352995 | SRR5008310 | Apis mellifera | single end | 2016 | 2015 | 2015 | Czech       | Europe        | 75522    | 0        | 0     | 0       | 0     |
| PRJNA352995 | SRR5008311 | Apis mellifera | single end | 2016 | 2015 | 2015 | Czech       | Europe        | 75643    | 0        | 0     | 0       | 0     |
| PRJNA352995 | SRR5008312 | Apis mellifera | single end | 2016 | 2015 | 2015 | Czech       | Europe        | 63058    | 0        | 0     | 0       | 0     |
| PRJNA352995 | SRR5008313 | Apis mellifera | single end | 2016 | 2015 | 2015 | Czech       | Europe        | 56124    | 0        | 0     | 0       | 0     |
| PRJNA352995 | SRR5008314 | Apis mellifera | single end | 2016 | 2015 | 2015 | Czech       | Europe        | 57145    | 0        | 0     | 0       | 0     |
| PRJNA352995 | SRR5008315 | Apis mellifera | single end | 2016 | 2015 | 2015 | Czech       | Europe        | 90371    | 0        | 0     | 0       | 0     |
| PRJNA352995 | SRR5008316 | Apis mellifera | single end | 2016 | 2014 | 2014 | Czech       | Europe        | 79720    | 0        | 0     | 0       | 0     |
| PRJNA352995 | SRR5008317 | Apis mellifera | single end | 2016 | 2015 | 2015 | Czech       | Europe        | 80566    | 0        | 0     | 0       | 0     |
| PRJNA353243 | SRR5012743 | Apis mellifera | single end | 2016 | 2014 | 2014 | Czech       | Europe        | 12173    | 0        | 0     | 0       | 0     |
| PRJNA353243 | SRR5012744 | Apis mellifera | single end | 2016 | 2014 | 2014 | Czech       | Europe        | 42287    | 0        | 0     | 0       | 0     |
| PRJNA353243 | SRR5012745 | Apis mellifera | single end | 2016 | 2014 | 2014 | Czech       | Europe        | 50244    | 0        | 0     | 0       | 0     |
| PRJNA353243 | SRR5012746 | Apis mellifera | single end | 2016 | 2014 | 2014 | Czech       | Europe        | 74423    | 0        | 0     | 0       | 0     |
| PRJNA353243 | SRR5012747 | Apis mellifera | single end | 2016 | 2014 | 2014 | Czech       | Europe        | 70984    | 0        | 0     | 0       | 0     |
| PRJNA353243 | SRR5012748 | Apis mellifera | single end | 2016 | 2014 | 2014 | Czech       | Europe        | 26067    | 0        | 0     | 0       | 0     |
| PRJNA353243 | SRR5012749 | Apis mellifera | single end | 2016 | 2014 | 2014 | Czech       | Europe        | 47993    | 0        | 0     | 0       | 0     |
| PRJNA353243 | SRR5012750 | Apis mellifera | single end | 2016 | 2014 | 2014 | Czech       | Europe        | 30220    | 0        | 0     | 0       | 0     |
| PRJNA353243 | SRR5012752 | Apis mellifera | single end | 2016 | 2014 | 2014 | Czech       | Europe        | 40498    | 0        | 0     | 0       | 0     |
| PRJNA353243 | SRR5012753 | Apis mellifera | single end | 2016 | 2014 | 2014 | Czech       | Europe        | 46638    | 0        | 0     | 0       | 0     |
| PRJNA353243 | SRR5012754 | Apis mellifera | single end | 2016 | 2014 | 2014 | Czech       | Europe        | 74325    | 0        | 0     | 0       | 0     |
| PRJNA353243 | SRR5012755 | Apis mellifera | single end | 2016 | 2014 | 2014 | Czech       | Europe        | 41251    | 0        | 0     | 0       | 0     |
| PRJNA353243 | SRR5012756 | Apis mellifera | single end | 2016 | 2014 | 2014 | Czech       | Europe        | 79720    | 0        | 0     | 0       | 0     |
| PRJNA353243 | SRR5012757 | Apis mellifera | single end | 2016 | 2014 | 2014 | Czech       | Europe        | 72063    | 0        | 0     | 0       | 0     |
| PRJNA353243 | SRR5012758 | Apis mellifera | single end | 2016 | 2014 | 2014 | Czech       | Europe        | 56267    | 0        | 0     | 0       | 0     |
| PRJNA353243 | SRR5012759 | Apis mellifera | single end | 2016 | 2014 | 2014 | Czech       | Europe        | 43784    | 0        | 0     | 0       | 0     |
| PRJNA353243 | SRR5012760 | Apis mellifera | single end | 2016 | 2014 | 2014 | Czech       | Europe        | 82909    | 0        | 0     | 0       | 0     |
| PRJNA353243 | SRR5012761 | Apis mellifera | single end | 2016 | 2014 | 2014 | Czech       | Europe        | 20931    | 0        | 0     | 0       | 0     |
| PRJNA353243 | SRR5012762 | Apis mellifera | single end | 2016 | 2014 | 2014 | Czech       | Europe        | 69890    | 0        | 0     | 0       | 0     |
| PRJNA353243 | SRR5012763 | Apis mellifera | single end | 2016 | 2014 | 2014 | Czech       | Europe        | 49920    | 0        | 0     | 0       | 0     |
| PRJNA353243 | SRR5012764 | Apis mellifera | single end | 2016 | 2014 | 2014 | Czech       | Europe        | 51390    | 0        | 0     | 0       | 0     |
| PRJNA353243 | SRR5012765 | Apis mellifera | single end | 2016 | 2014 | 2014 | Czech       | Europe        | 46926    | 0        | 0     | 0       | 0     |
| PRJNA353243 | SRR5012766 | Apis mellifera | single end | 2016 | 2014 | 2014 | Czech       | Europe        | 50153    | 0        | 0     | 0       | 0     |
| PRJNA353243 | SRR5012767 | Apis mellifera | single end | 2016 | 2014 | 2014 | Czech       | Europe        | 14389    | 0        | 0     | 0       | 0     |
| PRJNA374654 | SRR5252792 | Apis mellifera | single end | 2017 | NA   | 2015 | USA         | North America | 27338758 | 22954928 | 83.96 | 71396   | 0.26  |
| PRJNA374654 | SRR5252793 | Apis mellifera | single end | 2017 | NA   | 2015 | USA         | North America | 18225222 | 137999   | 0.76  | 418     | 0     |
| PRJNA374654 | SRR5252794 | Apis mellifera | single end | 2017 | NA   | 2015 | USA         | North America | 24683141 | 90953    | 0.37  | 316     | 0     |
| PRJNA374654 | SRR5252795 | Apis mellifera | single end | 2017 | NA   | 2015 | USA         | North America | 19927120 | 64181    | 0.32  | 211     | 0     |
| PRJNA374654 | SRR5252796 | Apis mellifera | single end | 2017 | NA   | 2015 | USA         | North America | 16706666 | 73885    | 0.44  | 207     | 0     |
| PRJNA374654 | SRR5252797 | Apis mellifera | single end | 2017 | NA   | 2015 | USA         | North America | 26007148 | 16497773 | 63.44 | 99275   | 0.38  |
| PRJNA374654 | SRR5252798 | Apis mellifera | single end | 2017 | NA   | 2015 | USA         | North America | 27712817 | 19917453 | 71.87 | 100605  | 0.36  |
| PRJNA374654 | SRR5252799 | Apis mellifera | single end | 2017 | NA   | 2015 | USA         | North America | 10804739 | 305630   | 2.83  | 1964    | 0.02  |
| PRJNA374654 | SRR5252800 | Apis mellifera | single end | 2017 | NA   | 2015 | USA         | North America | 15344334 | 9899892  | 64.52 | 56666   | 0.37  |
| PRJNA374654 | SRR5252801 | Apis mellifera | single end | 2017 | NA   | 2015 | USA         | North America | 27732490 | 87694    | 0.32  | 516     | 0     |
| PRJNA374654 | SRR5252802 | Apis mellifera | single end | 2017 | NA   | 2015 | USA         | North America | 21260599 | 17849070 | 83.95 | 177928  | 0.84  |
| PRJNA374654 | SRR5252803 | Apis mellifera | single end | 2017 | NA   | 2015 | USA         | North America | 33012513 | 2935006  | 8.89  | 28222   | 0.09  |
| PRJNA374654 | SRR5252804 | Apis mellifera | single end | 2017 | NA   | 2015 | USA         | North America | 30313176 | 25874081 | 85.36 | 192104  | 0.63  |
| PRJNA374654 | SRR5252805 | Apis mellifera | single end | 2017 | NA   | 2015 | USA         | North America | 25472838 | 200384   | 0.79  | 1514    | 0.01  |
| PRJNA374654 | SRR5252806 | Apis mellifera | single end | 2017 | NA   | 2015 | USA         | North America | 24363190 | 18361721 | 75.37 | 124289  | 0.51  |
| PRJNA172020 | SRR547522  | Apis mellifera | single end | 2015 | NA   | 2013 | NA          | NA            | 21057716 | 361824   | 1.72  | 176     | 0     |
| PRJNA172020 | SRR547523  | Apis mellifera | single end | 2015 | NA   | 2013 | NA          | NA            | 30295220 | 237198   | 0.78  | 174     | 0     |
| PRJNA175822 | SRR575799  | Apis mellifera | single end | 2013 | NA   | 2011 | NA          | NA            | 1762567  | 0        | 0     | 8       | 0     |
| PRJNA175822 | SRR575809  | Apis mellifera | single end | 2013 | NA   | 2011 | NA          | NA            | 4000000  |          |       |         |       |





|             |            |                |            |      |      |      |        |        |           |         |       |      |      |
|-------------|------------|----------------|------------|------|------|------|--------|--------|-----------|---------|-------|------|------|
| PRJNA470779 | SRR7143863 | Apis mellifera | single end | 2018 | NA   | 2016 | NA     | NA     | 3912692   | 0       | 0     | 0    | 0    |
| PRJNA470779 | SRR7143864 | Apis mellifera | single end | 2018 | NA   | 2016 | NA     | NA     | 2710367   | 0       | 0     | 0    | 0    |
| PRJNA470779 | SRR7143865 | Apis mellifera | single end | 2018 | NA   | 2016 | NA     | NA     | 2971306   | 0       | 0     | 0    | 0    |
| PRJNA470779 | SRR7143866 | Apis mellifera | single end | 2018 | NA   | 2016 | NA     | NA     | 4407222   | 0       | 0     | 0    | 0    |
| PRJNA470779 | SRR7143867 | Apis mellifera | single end | 2018 | NA   | 2016 | NA     | NA     | 8365812   | 0       | 0     | 0    | 0    |
| PRJNA470779 | SRR7143868 | Apis mellifera | single end | 2018 | NA   | 2016 | NA     | NA     | 1699340   | 0       | 0     | 0    | 0    |
| PRJNA477521 | SRR7412452 | Apis mellifera | single end | 2018 | 2015 | 2015 | Czech  | Europe | 65781     | 0       | 0     | 0    | 0    |
| PRJNA477521 | SRR7412453 | Apis mellifera | single end | 2018 | 2015 | 2015 | Czech  | Europe | 96482     | 0       | 0     | 0    | 0    |
| PRJNA477521 | SRR7412454 | Apis mellifera | single end | 2018 | 2015 | 2015 | Czech  | Europe | 83075     | 0       | 0     | 0    | 0    |
| PRJNA477521 | SRR7412455 | Apis mellifera | single end | 2018 | 2015 | 2015 | Czech  | Europe | 80566     | 0       | 0     | 0    | 0    |
| PRJNA477521 | SRR7412458 | Apis mellifera | single end | 2018 | 2017 | 2017 | Czech  | Europe | 106457    | 0       | 0     | 0    | 0    |
| PRJNA477521 | SRR7412459 | Apis mellifera | single end | 2018 | 2017 | 2017 | Czech  | Europe | 116482    | 0       | 0     | 0    | 0    |
| PRJNA477521 | SRR7412460 | Apis mellifera | single end | 2018 | 2017 | 2017 | Czech  | Europe | 109209    | 0       | 0     | 0    | 0    |
| PRJNA477521 | SRR7412461 | Apis mellifera | single end | 2018 | 2017 | 2017 | Czech  | Europe | 110363    | 0       | 0     | 0    | 0    |
| PRJNA477521 | SRR7412462 | Apis mellifera | single end | 2018 | 2017 | 2017 | Czech  | Europe | 97147     | 0       | 0     | 0    | 0    |
| PRJNA477521 | SRR7412463 | Apis mellifera | single end | 2018 | 2017 | 2017 | Czech  | Europe | 106912    | 0       | 0     | 0    | 0    |
| PRJNA477521 | SRR7412464 | Apis mellifera | single end | 2018 | 2017 | 2017 | Czech  | Europe | 108758    | 0       | 0     | 0    | 0    |
| PRJNA477521 | SRR7412465 | Apis mellifera | single end | 2018 | 2017 | 2017 | Czech  | Europe | 98520     | 0       | 0     | 0    | 0    |
| PRJNA477521 | SRR7412466 | Apis mellifera | single end | 2018 | 2017 | 2017 | Czech  | Europe | 125272    | 0       | 0     | 0    | 0    |
| PRJNA477521 | SRR7412467 | Apis mellifera | single end | 2018 | 2017 | 2017 | Czech  | Europe | 104169    | 0       | 0     | 0    | 0    |
| PRJNA477521 | SRR7412468 | Apis mellifera | single end | 2018 | 2015 | 2015 | Czech  | Europe | 75590     | 0       | 0     | 0    | 0    |
| PRJNA477521 | SRR7412469 | Apis mellifera | single end | 2018 | 2015 | 2015 | Czech  | Europe | 49219     | 0       | 0     | 0    | 0    |
| PRJNA477521 | SRR7412470 | Apis mellifera | single end | 2018 | 2015 | 2015 | Czech  | Europe | 62758     | 0       | 0     | 0    | 0    |
| PRJNA477521 | SRR7412471 | Apis mellifera | single end | 2018 | 2015 | 2015 | Czech  | Europe | 69444     | 0       | 0     | 0    | 0    |
| PRJNA477521 | SRR7412472 | Apis mellifera | single end | 2018 | 2015 | 2015 | Czech  | Europe | 85291     | 0       | 0     | 0    | 0    |
| PRJNA477521 | SRR7412473 | Apis mellifera | single end | 2018 | 2015 | 2015 | Czech  | Europe | 60723     | 0       | 0     | 0    | 0    |
| PRJNA477521 | SRR7412474 | Apis mellifera | single end | 2018 | 2015 | 2015 | Czech  | Europe | 70654     | 0       | 0     | 0    | 0    |
| PRJNA477521 | SRR7412475 | Apis mellifera | single end | 2018 | 2015 | 2015 | Czech  | Europe | 91600     | 0       | 0     | 0    | 0    |
| PRJNA477521 | SRR7412476 | Apis mellifera | single end | 2018 | 2015 | 2015 | Czech  | Europe | 57398     | 0       | 0     | 0    | 0    |
| PRJNA477521 | SRR7412477 | Apis mellifera | single end | 2018 | 2015 | 2015 | Czech  | Europe | 70758     | 0       | 0     | 0    | 0    |
| PRJNA477521 | SRR7412478 | Apis mellifera | single end | 2018 | 2017 | 2017 | Czech  | Europe | 123844    | 0       | 0     | 0    | 0    |
| PRJNA477521 | SRR7412479 | Apis mellifera | single end | 2018 | 2017 | 2017 | Czech  | Europe | 118020    | 0       | 0     | 0    | 0    |
| PRJNA477521 | SRR7412480 | Apis mellifera | single end | 2018 | 2017 | 2017 | Czech  | Europe | 105841    | 0       | 0     | 0    | 0    |
| PRJNA477521 | SRR7412481 | Apis mellifera | single end | 2018 | 2017 | 2017 | Czech  | Europe | 116880    | 0       | 0     | 0    | 0    |
| PRJNA477521 | SRR7412482 | Apis mellifera | single end | 2018 | 2017 | 2017 | Czech  | Europe | 112103    | 0       | 0     | 0    | 0    |
| PRJNA477521 | SRR7412483 | Apis mellifera | single end | 2018 | 2017 | 2017 | Czech  | Europe | 113019    | 0       | 0     | 0    | 0    |
| PRJNA477521 | SRR7412484 | Apis mellifera | single end | 2018 | 2017 | 2017 | Czech  | Europe | 104968    | 0       | 0     | 0    | 0    |
| PRJNA477521 | SRR7412485 | Apis mellifera | single end | 2018 | 2017 | 2017 | Czech  | Europe | 97301     | 0       | 0     | 0    | 0    |
| PRJNA477521 | SRR7412486 | Apis mellifera | single end | 2018 | 2017 | 2017 | Czech  | Europe | 119204    | 0       | 0     | 0    | 0    |
| PRJNA477521 | SRR7412487 | Apis mellifera | single end | 2018 | 2017 | 2017 | Czech  | Europe | 94610     | 0       | 0     | 0    | 0    |
| PRJNA477521 | SRR7412488 | Apis mellifera | single end | 2018 | 2015 | 2015 | Czech  | Europe | 73300     | 0       | 0     | 0    | 0    |
| PRJNA477521 | SRR7412489 | Apis mellifera | single end | 2018 | 2015 | 2015 | Czech  | Europe | 77570     | 0       | 0     | 0    | 0    |
| PRJNA477521 | SRR7412490 | Apis mellifera | single end | 2018 | 2015 | 2015 | Czech  | Europe | 65990     | 0       | 0     | 0    | 0    |
| PRJNA477521 | SRR7412491 | Apis mellifera | single end | 2018 | 2015 | 2015 | Czech  | Europe | 73297     | 0       | 0     | 0    | 0    |
| PRJNA477521 | SRR7412492 | Apis mellifera | single end | 2018 | 2015 | 2015 | Czech  | Europe | 82071     | 0       | 0     | 0    | 0    |
| PRJNA477521 | SRR7412493 | Apis mellifera | single end | 2018 | 2015 | 2015 | Czech  | Europe | 80085     | 0       | 0     | 0    | 0    |
| PRJNA477521 | SRR7412494 | Apis mellifera | single end | 2018 | 2015 | 2015 | Czech  | Europe | 82363     | 0       | 0     | 0    | 0    |
| PRJNA477521 | SRR7412495 | Apis mellifera | single end | 2018 | 2015 | 2015 | Czech  | Europe | 74555     | 0       | 0     | 0    | 0    |
| PRJNA477521 | SRR7412496 | Apis mellifera | single end | 2018 | 2015 | 2015 | Czech  | Europe | 69953     | 0       | 0     | 0    | 0    |
| PRJNA477521 | SRR7412497 | Apis mellifera | single end | 2018 | 2015 | 2015 | Czech  | Europe | 83171     | 0       | 0     | 0    | 0    |
| PRJNA477521 | SRR7412498 | Apis mellifera | single end | 2018 | 2017 | 2017 | Czech  | Europe | 106449    | 0       | 0     | 0    | 0    |
| PRJNA477521 | SRR7412499 | Apis mellifera | single end | 2018 | 2017 | 2017 | Czech  | Europe | 116533    | 0       | 0     | 0    | 0    |
| PRJNA477521 | SRR7412500 | Apis mellifera | single end | 2018 | 2017 | 2017 | Czech  | Europe | 82924     | 0       | 0     | 0    | 0    |
| PRJNA477521 | SRR7412501 | Apis mellifera | single end | 2018 | 2017 | 2017 | Czech  | Europe | 99521     | 0       | 0     | 0    | 0    |
| PRJNA477521 | SRR7412502 | Apis mellifera | single end | 2018 | 2017 | 2017 | Czech  | Europe | 110046    | 0       | 0     | 0    | 0    |
| PRJNA477521 | SRR7412503 | Apis mellifera | single end | 2018 | 2017 | 2017 | Czech  | Europe | 92840     | 0       | 0     | 0    | 0    |
| PRJNA477521 | SRR7412504 | Apis mellifera | single end | 2018 | 2017 | 2017 | Czech  | Europe | 60323     | 0       | 0     | 0    | 0    |
| PRJNA477521 | SRR7412505 | Apis mellifera | single end | 2018 | 2017 | 2017 | Czech  | Europe | 90387     | 0       | 0     | 0    | 0    |
| PRJNA477521 | SRR7412506 | Apis mellifera | single end | 2018 | 2017 | 2017 | Czech  | Europe | 84175     | 0       | 0     | 0    | 0    |
| PRJNA477521 | SRR7412507 | Apis mellifera | single end | 2018 | 2017 | 2017 | Czech  | Europe | 82543     | 0       | 0     | 0    | 0    |
| PRJNA477521 | SRR7412508 | Apis mellifera | single end | 2018 | 2017 | 2017 | Czech  | Europe | 94550     | 0       | 0     | 0    | 0    |
| PRJNA477521 | SRR7412509 | Apis mellifera | single end | 2018 | 2017 | 2017 | Czech  | Europe | 98899     | 0       | 0     | 0    | 0    |
| PRJNA477521 | SRR7412510 | Apis mellifera | single end | 2018 | 2017 | 2017 | Czech  | Europe | 26916     | 0       | 0     | 0    | 0    |
| PRJNA477521 | SRR7412511 | Apis mellifera | single end | 2018 | 2017 | 2017 | Czech  | Europe | 105393    | 0       | 0     | 0    | 0    |
| PRJNA477521 | SRR7412512 | Apis mellifera | single end | 2018 | 2017 | 2017 | Czech  | Europe | 51273     | 0       | 0     | 0    | 0    |
| PRJNA477521 | SRR7412513 | Apis mellifera | single end | 2018 | 2017 | 2017 | Czech  | Europe | 73323     | 0       | 0     | 0    | 0    |
| PRJNA479740 | SRR7472351 | Apis mellifera | single end | 2019 | NA   | 2017 | Israel | Asia   | 91982369  | 1197    | 0     | 0    | 0    |
| PRJNA479740 | SRR7472352 | Apis mellifera | single end | 2019 | NA   | 2017 | Israel | Asia   | 85455513  | 67      | 0     | 0    | 0    |
| PRJNA479740 | SRR7472353 | Apis mellifera | single end | 2019 | NA   | 2017 | Israel | Asia   | 78911350  | 0       | 0     | 0    | 0    |
| PRJNA479740 | SRR7472354 | Apis mellifera | single end | 2019 | NA   | 2017 | Israel | Asia   | 68198141  | 4037358 | 5.92  | 1394 | 0    |
| PRJNA479740 | SRR7472355 | Apis mellifera | single end | 2019 | NA   | 2017 | Israel | Asia   | 71335775  | 73      | 0     | 0    | 0    |
| PRJNA479740 | SRR7472356 | Apis mellifera | single end | 2019 | NA   | 2017 | Israel | Asia   | 82270736  | 2189    | 0     | 1    | 0    |
| PRJNA479740 | SRR7472357 | Apis mellifera | single end | 2019 | NA   | 2017 | Israel | Asia   | 77033392  | 8978778 | 11.66 | 1061 | 0    |
| PRJNA479740 | SRR7472358 | Apis mellifera | single end | 2019 | NA   | 2017 | Israel | Asia   | 83946531  | 40      | 0     | 0    | 0    |
| PRJNA479740 | SRR7472359 | Apis mellifera | single end | 2019 | NA   | 2017 | Israel | Asia   | 90571141  | 5       | 0     | 1    | 0    |
| PRJNA479740 | SRR7472360 | Apis mellifera | single end | 2019 | NA   | 2017 | Israel | Asia   | 92133396  | 11      | 0     | 0    | 0    |
| PRJNA479740 | SRR7472361 | Apis mellifera | single end | 2019 | NA   | 2017 | Israel | Asia   | 53706119  | 53436   | 0.1   | 8    | 0    |
| PRJNA479740 | SRR7472362 | Apis mellifera | single end | 2019 | NA   | 2017 | Israel | Asia   | 131938627 | 61      | 0     | 0    | 0    |
| PRJNA479740 | SRR7472363 | Apis mellifera | single end | 2019 | NA   | 2017 | Israel | Asia   | 57406008  | 731     | 0     | 1    | 0    |
| PRJNA172020 | SRR765681  | Apis mellifera | single end | 2015 | NA   | 2013 | NA     | NA     | 29462269  | 983595  | 3.34  | 259  | 0    |
| PRJNA192195 | SRR771439  | Apis mellifera | single end | 2014 | NA   | 2012 | NA     | NA     | 6717618   | 425     | 0.01  | 13   | 0    |
| PRJNA192195 | SRR771440  | Apis mellifera | single end | 2014 | NA   | 2012 | NA     | NA     | 7308203   | 1395    | 0.02  | 38   | 0    |
| PRJNA192448 | SRR771525  | Apis mellifera | single end | 2015 | NA   | 2013 | NA     | NA     | 3649743   | 0       | 0     | 0    | 0    |
| PRJNA192448 | SRR771526  | Apis mellifera | single end | 2015 | NA   | 2013 | NA     | NA     | 3727670   | 0       | 0     | 0    | 0    |
| PRJNA488619 | SRR7770431 | Apis mellifera | single end | 2019 | NA   | 2017 | China  | Asia   | 13536823  | 28      | 0     | 1    | 0    |
| PRJNA488619 | SRR7770434 | Apis mellifera | single end | 2019 | NA   | 2017 | China  | Asia   | 12986893  | 818     | 0.01  | 30   | 0    |
| PRJNA488619 | SRR7770437 | Apis mellifera | single end | 2019 | NA   | 2017 | China  | Asia   | 13474091  | 3263    | 0.02  | 48   | 0    |
| PRJNA193691 | SRR789759  | Apis mellifera | single end | 2013 | NA   | 2011 | NA     | NA     | 175796462 | 0       | 0     | 47   | 0    |
| PRJNA193691 | SRR789760  | Apis mellifera | single end | 2013 | NA   | 2011 | NA     | NA     | 168267063 | 0       | 0     | 207  | 0    |
| PRJNA193691 | SRR789761  | Apis mellifera | single end | 2013 | NA   | 2011 | NA     | NA     | 178934269 | 1       | 0     | 573  | 0    |
| PRJNA193691 | SRR789762  | Apis mellifera | single end | 2013 | NA   | 2011 | NA     | NA     | 189487841 | 1       | 0     | 142  | 0    |
| PRJNA193691 | SRR789763  | Apis mellifera | single end | 2013 | NA   | 2011 | NA     | NA     | 162754857 | 0       | 0     | 50   | 0    |
| PRJNA193691 | SRR789764  | Apis mellifera | single end | 2013 | NA   | 2011 | NA     | NA     | 153692102 | 0       | 0     | 1352 | 0    |
| PRJNA493573 | SRR7908186 | Apis mellifera | single end | 2019 | NA   | 2017 | NA     | NA     | 7160479   | 8       | 0     | 0    | 0    |
| PRJNA493573 | SRR7908187 | Apis mellifera | single end | 2019 | NA   | 2017 | NA     | NA     | 6964277   | 2       | 0     | 0    | 0    |
| PRJNA493573 | SRR7908188 | Apis mellifera | single end | 2019 | NA   | 2017 | NA     | NA     | 7503621   | 0       | 0     | 0    | 0    |
| PRJNA493573 | SRR7908189 | Apis mellifera | single end | 2019 | NA   | 2017 | NA     | NA     | 7008828   | 0       | 0     | 0    | 0    |
| PRJNA493573 | SRR7908190 | Apis mellifera | single end | 2019 | NA   | 2017 | NA     | NA     | 7192461   | 267     | 0     | 0    | 0    |
| PRJNA493573 | SRR7908191 | Apis mellifera | single end | 2019 | NA   | 2017 | NA     | NA     | 7196797   | 270     | 0     | 0    | 0    |
| PRJNA498667 | SRR8113905 | Apis mellifera | single end | 2018 | 2012 | 2012 | China  | Asia   | 6048878   | 177712  | 2.94  | 3698 | 0.06 |
| PRJNA498919 | SRR8121077 | Apis mellifera | single end | 2018 | NA   | 2016 | NA     | NA     | 7829091   | 1       |       |      |      |



|             |            |                |            |      |      |      |       |               |          |         |      |       |      |
|-------------|------------|----------------|------------|------|------|------|-------|---------------|----------|---------|------|-------|------|
| PRJNA498919 | SRR8121083 | Apis mellifera | single end | 2018 | NA   | 2016 | NA    | NA            | 6623278  | 4       | 0    | 1     | 0    |
| PRJNA498919 | SRR8121084 | Apis mellifera | single end | 2018 | NA   | 2016 | NA    | NA            | 6757394  | 2       | 0    | 1     | 0    |
| PRJNA498919 | SRR8121085 | Apis mellifera | single end | 2018 | NA   | 2016 | NA    | NA            | 5713379  | 0       | 0    | 0     | 0    |
| PRJNA498919 | SRR8121086 | Apis mellifera | single end | 2018 | NA   | 2016 | NA    | NA            | 5701450  | 1       | 0    | 0     | 0    |
| PRJNA498919 | SRR8121087 | Apis mellifera | single end | 2018 | NA   | 2016 | NA    | NA            | 5076375  | 0       | 0    | 1     | 0    |
| PRJNA498919 | SRR8121088 | Apis mellifera | single end | 2018 | NA   | 2016 | NA    | NA            | 5079272  | 2       | 0    | 0     | 0    |
| PRJNA498919 | SRR8121089 | Apis mellifera | single end | 2018 | NA   | 2016 | NA    | NA            | 6681281  | 8       | 0    | 3     | 0    |
| PRJNA498919 | SRR8121090 | Apis mellifera | single end | 2018 | NA   | 2016 | NA    | NA            | 6806552  | 7       | 0    | 2     | 0    |
| PRJNA498919 | SRR8121091 | Apis mellifera | single end | 2018 | NA   | 2016 | NA    | NA            | 5392764  | 6       | 0    | 1     | 0    |
| PRJNA498919 | SRR8121092 | Apis mellifera | single end | 2018 | NA   | 2016 | NA    | NA            | 5513219  | 2       | 0    | 0     | 0    |
| PRJNA498919 | SRR8121093 | Apis mellifera | single end | 2018 | NA   | 2016 | NA    | NA            | 6536387  | 6       | 0    | 4     | 0    |
| PRJNA498919 | SRR8121094 | Apis mellifera | single end | 2018 | NA   | 2016 | NA    | NA            | 6519216  | 5       | 0    | 2     | 0    |
| PRJNA498919 | SRR8121095 | Apis mellifera | single end | 2018 | NA   | 2016 | NA    | NA            | 6571468  | 1383    | 0.02 | 17    | 0    |
| PRJNA498919 | SRR8121096 | Apis mellifera | single end | 2018 | NA   | 2016 | NA    | NA            | 6549426  | 1342    | 0.02 | 15    | 0    |
| PRJNA498919 | SRR8121097 | Apis mellifera | single end | 2018 | NA   | 2016 | NA    | NA            | 7858990  | 3       | 0    | 1     | 0    |
| PRJNA498919 | SRR8121098 | Apis mellifera | single end | 2018 | NA   | 2016 | NA    | NA            | 7845242  | 2       | 0    | 2     | 0    |
| PRJNA498919 | SRR8121099 | Apis mellifera | single end | 2018 | NA   | 2016 | NA    | NA            | 7033175  | 2       | 0    | 2     | 0    |
| PRJNA498919 | SRR8121100 | Apis mellifera | single end | 2018 | NA   | 2016 | NA    | NA            | 7019872  | 3       | 0    | 1     | 0    |
| PRJNA498919 | SRR8121101 | Apis mellifera | single end | 2018 | NA   | 2016 | NA    | NA            | 4941484  | 1       | 0    | 0     | 0    |
| PRJNA498919 | SRR8121102 | Apis mellifera | single end | 2018 | NA   | 2016 | NA    | NA            | 5049220  | 3       | 0    | 0     | 0    |
| PRJNA498919 | SRR8121103 | Apis mellifera | single end | 2018 | NA   | 2016 | NA    | NA            | 7000364  | 1       | 0    | 0     | 0    |
| PRJNA498919 | SRR8121104 | Apis mellifera | single end | 2018 | NA   | 2016 | NA    | NA            | 7141426  | 1       | 0    | 0     | 0    |
| PRJNA498919 | SRR8121105 | Apis mellifera | single end | 2018 | NA   | 2016 | NA    | NA            | 7351445  | 5       | 0    | 0     | 0    |
| PRJNA498919 | SRR8121106 | Apis mellifera | single end | 2018 | NA   | 2016 | NA    | NA            | 7489702  | 9       | 0    | 0     | 0    |
| PRJNA498919 | SRR8121107 | Apis mellifera | single end | 2018 | NA   | 2016 | NA    | NA            | 8824889  | 2       | 0    | 1     | 0    |
| PRJNA498919 | SRR8121108 | Apis mellifera | single end | 2018 | NA   | 2016 | NA    | NA            | 8998819  | 2       | 0    | 0     | 0    |
| PRJNA498919 | SRR8121109 | Apis mellifera | single end | 2018 | NA   | 2016 | NA    | NA            | 8209434  | 209     | 0    | 0     | 0    |
| PRJNA498919 | SRR8121110 | Apis mellifera | single end | 2018 | NA   | 2016 | NA    | NA            | 8214288  | 210     | 0    | 2     | 0    |
| PRJNA498919 | SRR8121111 | Apis mellifera | single end | 2018 | NA   | 2016 | NA    | NA            | 7035205  | 7       | 0    | 0     | 0    |
| PRJNA498919 | SRR8121112 | Apis mellifera | single end | 2018 | NA   | 2016 | NA    | NA            | 7011817  | 9       | 0    | 0     | 0    |
| PRJNA498919 | SRR8121113 | Apis mellifera | single end | 2018 | NA   | 2016 | NA    | NA            | 7145807  | 3       | 0    | 3     | 0    |
| PRJNA498919 | SRR8121114 | Apis mellifera | single end | 2018 | NA   | 2016 | NA    | NA            | 7291094  | 8       | 0    | 5     | 0    |
| PRJNA498919 | SRR8121115 | Apis mellifera | single end | 2018 | NA   | 2016 | NA    | NA            | 6617980  | 8       | 0    | 1     | 0    |
| PRJNA498919 | SRR8121116 | Apis mellifera | single end | 2018 | NA   | 2016 | NA    | NA            | 6746529  | 6       | 0    | 3     | 0    |
| PRJNA498919 | SRR8121117 | Apis mellifera | single end | 2018 | NA   | 2016 | NA    | NA            | 6572678  | 2       | 0    | 2     | 0    |
| PRJNA498919 | SRR8121118 | Apis mellifera | single end | 2018 | NA   | 2016 | NA    | NA            | 6564364  | 3       | 0    | 1     | 0    |
| PRJNA498919 | SRR8121119 | Apis mellifera | single end | 2018 | NA   | 2016 | NA    | NA            | 6599951  | 1       | 0    | 3     | 0    |
| PRJNA498919 | SRR8121120 | Apis mellifera | single end | 2018 | NA   | 2016 | NA    | NA            | 6599505  | 5       | 0    | 1     | 0    |
| PRJNA498919 | SRR8121121 | Apis mellifera | single end | 2018 | NA   | 2016 | NA    | NA            | 7396232  | 3       | 0    | 21    | 0    |
| PRJNA498919 | SRR8121122 | Apis mellifera | single end | 2018 | NA   | 2016 | NA    | NA            | 7404053  | 4       | 0    | 23    | 0    |
| PRJNA498919 | SRR8121123 | Apis mellifera | single end | 2018 | NA   | 2016 | NA    | NA            | 5832551  | 1       | 0    | 0     | 0    |
| PRJNA498919 | SRR8121124 | Apis mellifera | single end | 2018 | NA   | 2016 | NA    | NA            | 5815553  | 2       | 0    | 0     | 0    |
| PRJNA509310 | SRR8297880 | Apis mellifera | single end | 2019 | NA   | 2017 | NA    | NA            | 25151700 | 0       | 0    | 0     | 0    |
| PRJNA509310 | SRR8297881 | Apis mellifera | single end | 2019 | NA   | 2017 | NA    | NA            | 26931529 | 0       | 0    | 0     | 0    |
| PRJNA509310 | SRR8297882 | Apis mellifera | single end | 2019 | NA   | 2017 | NA    | NA            | 31153280 | 0       | 0    | 0     | 0    |
| PRJNA509310 | SRR8297883 | Apis mellifera | single end | 2019 | NA   | 2017 | NA    | NA            | 11946112 | 0       | 0    | 0     | 0    |
| PRJNA509310 | SRR8297884 | Apis mellifera | single end | 2019 | NA   | 2017 | NA    | NA            | 29411726 | 0       | 0    | 0     | 0    |
| PRJNA509310 | SRR8297885 | Apis mellifera | single end | 2019 | NA   | 2017 | NA    | NA            | 29534124 | 0       | 0    | 0     | 0    |
| PRJNA509310 | SRR8297886 | Apis mellifera | single end | 2019 | NA   | 2017 | NA    | NA            | 24099805 | 0       | 0    | 0     | 0    |
| PRJNA509310 | SRR8297887 | Apis mellifera | single end | 2019 | NA   | 2017 | NA    | NA            | 61142238 | 0       | 0    | 0     | 0    |
| PRJNA509310 | SRR8297888 | Apis mellifera | single end | 2019 | NA   | 2017 | NA    | NA            | 30770220 | 0       | 0    | 0     | 0    |
| PRJNA509310 | SRR8297889 | Apis mellifera | single end | 2019 | NA   | 2017 | NA    | NA            | 21854918 | 0       | 0    | 0     | 0    |
| PRJNA509310 | SRR8297890 | Apis mellifera | single end | 2019 | NA   | 2017 | NA    | NA            | 23006419 | 0       | 0    | 0     | 0    |
| PRJNA509310 | SRR8297891 | Apis mellifera | single end | 2019 | NA   | 2017 | NA    | NA            | 22773174 | 0       | 0    | 0     | 0    |
| PRJNA200755 | SRR838836  | Apis mellifera | single end | 2015 | NA   | 2013 | China | Asia          | 5968823  | 0       | 0    | 0     | 0    |
| PRJNA200755 | SRR838837  | Apis mellifera | single end | 2015 | NA   | 2013 | China | Asia          | 6235889  | 0       | 0    | 0     | 0    |
| PRJNA200755 | SRR838838  | Apis mellifera | single end | 2015 | NA   | 2013 | China | Asia          | 6044451  | 0       | 0    | 0     | 0    |
| PRJNA201010 | SRR839279  | Apis mellifera | single end | 2015 | 2011 | 2011 | China | Asia          | 5812242  | 0       | 0    | 0     | 0    |
| PRJNA201010 | SRR839350  | Apis mellifera | single end | 2015 | 2011 | 2011 | China | Asia          | 5769851  | 0       | 0    | 0     | 0    |
| PRJNA201386 | SRR850492  | Apis mellifera | single end | 2015 | 2011 | 2011 | China | Asia          | 5814195  | 0       | 0    | 0     | 0    |
| PRJNA201386 | SRR850493  | Apis mellifera | single end | 2015 | 2011 | 2011 | China | Asia          | 6071332  | 0       | 0    | 0     | 0    |
| PRJNA524311 | SRR8632761 | Apis mellifera | single end | 2019 | NA   | 2017 | NA    | NA            | 44727939 | 0       | 0    | 0     | 0    |
| PRJNA524311 | SRR8632762 | Apis mellifera | single end | 2019 | NA   | 2017 | NA    | NA            | 38806853 | 0       | 0    | 0     | 0    |
| PRJNA524311 | SRR8632763 | Apis mellifera | single end | 2019 | NA   | 2017 | NA    | NA            | 51076634 | 0       | 0    | 0     | 0    |
| PRJNA524311 | SRR8632764 | Apis mellifera | single end | 2019 | NA   | 2017 | NA    | NA            | 74375492 | 0       | 0    | 0     | 0    |
| PRJNA524311 | SRR8632765 | Apis mellifera | single end | 2019 | NA   | 2017 | NA    | NA            | 68303763 | 0       | 0    | 0     | 0    |
| PRJNA524311 | SRR8632766 | Apis mellifera | single end | 2019 | NA   | 2017 | NA    | NA            | 56388221 | 0       | 0    | 0     | 0    |
| PRJNA524311 | SRR8632767 | Apis mellifera | single end | 2019 | NA   | 2017 | NA    | NA            | 59082926 | 0       | 0    | 0     | 0    |
| PRJNA524311 | SRR8632768 | Apis mellifera | single end | 2019 | NA   | 2017 | NA    | NA            | 50519949 | 0       | 0    | 0     | 0    |
| PRJNA524311 | SRR8632769 | Apis mellifera | single end | 2019 | NA   | 2017 | NA    | NA            | 55420982 | 0       | 0    | 0     | 0    |
| PRJNA524311 | SRR8632770 | Apis mellifera | single end | 2019 | NA   | 2017 | NA    | NA            | 45973938 | 0       | 0    | 0     | 0    |
| PRJNA524311 | SRR8632771 | Apis mellifera | single end | 2019 | NA   | 2017 | NA    | NA            | 57558336 | 0       | 0    | 0     | 0    |
| PRJNA524311 | SRR8632772 | Apis mellifera | single end | 2019 | NA   | 2017 | NA    | NA            | 49949665 | 0       | 0    | 0     | 0    |
| PRJNA524311 | SRR8632773 | Apis mellifera | single end | 2019 | NA   | 2017 | NA    | NA            | 47790096 | 0       | 0    | 0     | 0    |
| PRJNA524311 | SRR8632774 | Apis mellifera | single end | 2019 | NA   | 2017 | NA    | NA            | 53142699 | 1       | 0    | 0     | 0    |
| PRJNA524311 | SRR8632775 | Apis mellifera | single end | 2019 | NA   | 2017 | NA    | NA            | 62186933 | 0       | 0    | 0     | 0    |
| PRJNA524311 | SRR8632776 | Apis mellifera | single end | 2019 | NA   | 2017 | NA    | NA            | 49571778 | 0       | 0    | 0     | 0    |
| PRJNA524311 | SRR8632777 | Apis mellifera | single end | 2019 | NA   | 2017 | NA    | NA            | 53911242 | 0       | 0    | 0     | 0    |
| PRJNA524311 | SRR8632778 | Apis mellifera | single end | 2019 | NA   | 2017 | NA    | NA            | 63554891 | 0       | 0    | 0     | 0    |
| PRJNA203871 | SRR863701  | Apis mellifera | single end | 2015 | NA   | 2013 | NA    | NA            | 3573941  | 0       | 0    | 0     | 0    |
| PRJNA203871 | SRR863702  | Apis mellifera | single end | 2015 | NA   | 2013 | NA    | NA            | 3562730  | 0       | 0    | 0     | 0    |
| PRJNA203871 | SRR863703  | Apis mellifera | single end | 2015 | NA   | 2013 | NA    | NA            | 3551541  | 0       | 0    | 0     | 0    |
| PRJNA203871 | SRR863704  | Apis mellifera | single end | 2015 | NA   | 2013 | NA    | NA            | 3524453  | 0       | 0    | 0     | 0    |
| PRJNA203871 | SRR863705  | Apis mellifera | single end | 2015 | NA   | 2013 | NA    | NA            | 3615558  | 0       | 0    | 0     | 0    |
| PRJNA204963 | SRR866904  | Apis mellifera | single end | 2015 | NA   | 2013 | China | Asia          | 6077700  | 0       | 0    | 0     | 0    |
| PRJNA204963 | SRR866905  | Apis mellifera | single end | 2015 | NA   | 2013 | China | Asia          | 5968823  | 0       | 0    | 0     | 0    |
| PRJNA205104 | SRR867198  | Apis mellifera | single end | 2015 | 2012 | 2012 | China | Asia          | 12000000 | 0       | 0    | 0     | 0    |
| PRJNA205104 | SRR867202  | Apis mellifera | single end | 2015 | 2012 | 2012 | China | Asia          | 12000000 | 0       | 0    | 0     | 0    |
| PRJNA205329 | SRR868713  | Apis mellifera | single end | 2015 | NA   | 2013 | NA    | NA            | 5999932  | 0       | 0    | 0     | 0    |
| PRJNA205329 | SRR868714  | Apis mellifera | single end | 2015 | NA   | 2013 | NA    | NA            | 6090470  | 0       | 0    | 0     | 0    |
| PRJNA205329 | SRR868715  | Apis mellifera | single end | 2015 | NA   | 2013 | NA    | NA            | 6090470  | 0       | 0    | 0     | 0    |
| PRJNA528102 | SRR8754003 | Apis mellifera | single end | 2019 | 2015 | 2015 | USA   | North America | 72815162 | 3593    | 0    | 28    | 0    |
| PRJNA528102 | SRR8754004 | Apis mellifera | single end | 2019 | 2015 | 2015 | USA   | North America | 63979027 | 88577   | 0.14 | 336   | 0    |
| PRJNA528102 | SRR8754005 | Apis mellifera | single end | 2019 | 2015 | 2015 | USA   | North America | 71942514 | 3169    | 0    | 15    | 0    |
| PRJNA528102 | SRR8754006 | Apis mellifera | single end | 2019 | 2015 | 2015 | USA   | North America | 53645693 | 3244    | 0.01 | 16    | 0    |
| PRJNA528102 | SRR8754007 | Apis mellifera | single end | 2019 | 2015 | 2015 | USA   | North America | 56405749 | 3801    | 0.01 | 18    | 0    |
| PRJNA528102 | SRR8754008 | Apis mellifera | single end | 2019 | 2015 | 2015 | USA   | North America | 77241988 | 10458   | 0.01 | 40    | 0    |
| PRJNA528102 | SRR8754009 | Apis mellifera | single end | 2019 | 2015 | 2015 | USA   | North America | 94642154 | 3832    | 0    | 15    | 0    |
| PRJNA528102 | SRR8754010 | Apis mellifera | single end | 2019 | 2015 | 2015 | USA   | North America | 48938453 | 2689    | 0.01 | 7     | 0    |
| PRJNA528102 | SRR8754011 | Apis mellifera | single end | 2019 | 2015 | 2015 | USA   | North America | 41309867 | 15595   | 0.04 | 50    | 0    |
| PRJNA528102 | SRR8754012 | Apis mellifera | single end | 2019 | 2015 | 2015 | USA   | North America | 69898738 | 3626391 | 5.19 | 14438 | 0.02 |
| PRJNA528102 | SRR        |                |            |      |      |      |       |               |          |         |      |       |      |

|             |            |                |            |      |      |      |       |               |          |          |       |        |      |
|-------------|------------|----------------|------------|------|------|------|-------|---------------|----------|----------|-------|--------|------|
| PRJNA528102 | SRR8754018 | Apis mellifera | single end | 2019 | 2015 | 2015 | USA   | North America | 53047267 | 2890     | 0.01  | 10     | 0    |
| PRJNA528102 | SRR8754019 | Apis mellifera | single end | 2019 | 2015 | 2015 | USA   | North America | 90816956 | 23581978 | 25.97 | 93646  | 0.1  |
| PRJNA528102 | SRR8754020 | Apis mellifera | single end | 2019 | 2015 | 2015 | USA   | North America | 58415925 | 2951     | 0.01  | 11     | 0    |
| PRJNA533756 | SRR9705226 | Apis mellifera | single end | 2019 | 2016 | 2016 | Japan | Asia          | 15486411 | 2673     | 0.02  | 204    | 0    |
| PRJNA533756 | SRR9705227 | Apis mellifera | single end | 2019 | 2016 | 2016 | Japan | Asia          | 19061256 | 596      | 0     | 53     | 0    |
| PRJNA533756 | SRR9705228 | Apis mellifera | single end | 2019 | 2016 | 2016 | Japan | Asia          | 24164968 | 1432     | 0.01  | 116    | 0    |
| PRJNA533756 | SRR9705229 | Apis mellifera | single end | 2019 | 2016 | 2016 | Japan | Asia          | 18570697 | 452      | 0     | 49     | 0    |
| PRJNA533756 | SRR9705230 | Apis mellifera | single end | 2019 | 2016 | 2016 | Japan | Asia          | 10416804 | 1344     | 0.01  | 232    | 0    |
| PRJNA533756 | SRR9705231 | Apis mellifera | single end | 2019 | 2016 | 2016 | Japan | Asia          | 11365034 | 999      | 0.01  | 129    | 0    |
| PRJNA533756 | SRR9705232 | Apis mellifera | single end | 2019 | 2016 | 2016 | Japan | Asia          | 9333900  | 1271     | 0.01  | 257    | 0    |
| PRJNA533756 | SRR9705233 | Apis mellifera | single end | 2019 | 2016 | 2016 | Japan | Asia          | 17293918 | 1787     | 0.01  | 328    | 0    |
| PRJNA533756 | SRR9705234 | Apis mellifera | single end | 2019 | 2016 | 2016 | Japan | Asia          | 19729923 | 193      | 0     | 25     | 0    |
| PRJNA533756 | SRR9705235 | Apis mellifera | single end | 2019 | 2016 | 2016 | Japan | Asia          | 16406968 | 942      | 0.01  | 149    | 0    |
| PRJNA533756 | SRR9705236 | Apis mellifera | single end | 2019 | 2016 | 2016 | Japan | Asia          | 14039971 | 2135     | 0.02  | 365    | 0    |
| PRJNA533756 | SRR9705237 | Apis mellifera | single end | 2019 | 2016 | 2016 | Japan | Asia          | 15783175 | 1712     | 0.01  | 309    | 0    |
| PRJNA533756 | SRR9705238 | Apis mellifera | single end | 2019 | 2016 | 2016 | Japan | Asia          | 17808966 | 3490     | 0.02  | 311    | 0    |
| PRJNA533756 | SRR9705239 | Apis mellifera | single end | 2019 | 2016 | 2016 | Japan | Asia          | 14285040 | 3466     | 0.02  | 438    | 0    |
| PRJNA533756 | SRR9705240 | Apis mellifera | single end | 2019 | 2016 | 2016 | Japan | Asia          | 9064418  | 1813     | 0.02  | 325    | 0    |
| PRJNA533756 | SRR9705241 | Apis mellifera | single end | 2019 | 2016 | 2016 | Japan | Asia          | 10936575 | 1586     | 0.01  | 237    | 0    |
| PRJNA533756 | SRR9705242 | Apis mellifera | single end | 2019 | 2016 | 2016 | Japan | Asia          | 17124324 | 280      | 0     | 17     | 0    |
| PRJNA533756 | SRR9705243 | Apis mellifera | single end | 2019 | 2016 | 2016 | Japan | Asia          | 16010731 | 789      | 0     | 88     | 0    |
| PRJNA533756 | SRR9705244 | Apis mellifera | single end | 2019 | 2016 | 2016 | Japan | Asia          | 14292033 | 1595     | 0.01  | 184    | 0    |
| PRJNA533756 | SRR9705245 | Apis mellifera | single end | 2019 | 2016 | 2016 | Japan | Asia          | 18148190 | 867      | 0     | 119    | 0    |
| PRJNA533756 | SRR9705246 | Apis mellifera | single end | 2019 | 2016 | 2016 | Japan | Asia          | 9661733  | 2196     | 0.02  | 347    | 0    |
| PRJNA533756 | SRR9705247 | Apis mellifera | single end | 2019 | 2016 | 2016 | Japan | Asia          | 14314346 | 3421     | 0.02  | 469    | 0    |
| PRJNA533756 | SRR9705248 | Apis mellifera | single end | 2019 | 2016 | 2016 | Japan | Asia          | 16036487 | 197      | 0     | 31     | 0    |
| PRJNA533756 | SRR9705249 | Apis mellifera | single end | 2019 | 2016 | 2016 | Japan | Asia          | 14647016 | 6906     | 0.05  | 687    | 0    |
| PRJNA533756 | SRR9705250 | Apis mellifera | single end | 2019 | 2016 | 2016 | Japan | Asia          | 27808197 | 159      | 0     | 29     | 0    |
| PRJNA533756 | SRR9705251 | Apis mellifera | single end | 2019 | 2016 | 2016 | Japan | Asia          | 21800855 | 901      | 0     | 84     | 0    |
| PRJNA533756 | SRR9705252 | Apis mellifera | single end | 2019 | 2016 | 2016 | Japan | Asia          | 10890306 | 823      | 0.01  | 120    | 0    |
| PRJNA533756 | SRR9705253 | Apis mellifera | single end | 2019 | 2016 | 2016 | Japan | Asia          | 9167335  | 7        | 0     | 2      | 0    |
| PRJNA533756 | SRR9705254 | Apis mellifera | single end | 2019 | 2016 | 2016 | Japan | Asia          | 20643996 | 4170     | 0.02  | 317    | 0    |
| PRJNA533756 | SRR9705255 | Apis mellifera | single end | 2019 | 2016 | 2016 | Japan | Asia          | 14029384 | 74       | 0     | 10     | 0    |
| PRJNA533756 | SRR9705256 | Apis mellifera | single end | 2019 | 2016 | 2016 | Japan | Asia          | 13007755 | 1603     | 0.01  | 263    | 0    |
| PRJNA533756 | SRR9705257 | Apis mellifera | single end | 2019 | 2016 | 2016 | Japan | Asia          | 19661861 | 5690     | 0.03  | 644    | 0    |
| PRJNA533756 | SRR9705258 | Apis mellifera | single end | 2019 | 2016 | 2016 | Japan | Asia          | 15544593 | 1264     | 0.01  | 208    | 0    |
| PRJNA533756 | SRR9705259 | Apis mellifera | single end | 2019 | 2016 | 2016 | Japan | Asia          | 17570463 | 6098     | 0.03  | 636    | 0    |
| PRJNA533756 | SRR9705260 | Apis mellifera | single end | 2019 | 2016 | 2016 | Japan | Asia          | 19589050 | 819      | 0     | 85     | 0    |
| PRJNA533756 | SRR9705261 | Apis mellifera | single end | 2019 | 2016 | 2016 | Japan | Asia          | 17704182 | 171      | 0     | 32     | 0    |
| PRJNA533756 | SRR9705262 | Apis mellifera | single end | 2019 | 2016 | 2016 | Japan | Asia          | 14740052 | 6097     | 0.04  | 641    | 0    |
| PRJNA533756 | SRR9705263 | Apis mellifera | single end | 2019 | 2016 | 2016 | Japan | Asia          | 18298556 | 7608     | 0.04  | 794    | 0    |
| PRJNA533756 | SRR9705264 | Apis mellifera | single end | 2019 | 2016 | 2016 | Japan | Asia          | 18787150 | 5771     | 0.03  | 587    | 0    |
| PRJNA533756 | SRR9705265 | Apis mellifera | single end | 2019 | 2016 | 2016 | Japan | Asia          | 12991441 | 2549     | 0.02  | 192    | 0    |
| PRJNA533756 | SRR9705266 | Apis mellifera | single end | 2019 | 2016 | 2016 | Japan | Asia          | 25765138 | 2748     | 0.01  | 209    | 0    |
| PRJNA533756 | SRR9705267 | Apis mellifera | single end | 2019 | 2016 | 2016 | Japan | Asia          | 16185159 | 2914788  | 18.01 | 483309 | 2.99 |
| PRJNA533756 | SRR9705268 | Apis mellifera | single end | 2019 | 2016 | 2016 | Japan | Asia          | 16654120 | 3112017  | 18.69 | 588743 | 3.54 |
| PRJNA533756 | SRR9705269 | Apis mellifera | single end | 2019 | 2016 | 2016 | Japan | Asia          | 15268086 | 3743058  | 22.52 | 713167 | 4.67 |
| PRJNA533756 | SRR9705270 | Apis mellifera | single end | 2019 | 2016 | 2016 | Japan | Asia          | 16545887 | 3802769  | 24.98 | 704270 | 4.26 |
| PRJNA533756 | SRR9705271 | Apis mellifera | single end | 2019 | 2016 | 2016 | Japan | Asia          | 13146986 | 3509636  | 26.7  | 468846 | 3.57 |
| PRJNA533756 | SRR9705272 | Apis mellifera | single end | 2019 | 2016 | 2016 | Japan | Asia          | 15255349 | 519383   | 3.4   | 95135  | 0.62 |
| PRJNA533756 | SRR9705273 | Apis mellifera | single end | 2019 | 2016 | 2016 | Japan | Asia          | 15241937 | 638310   | 4.19  | 101015 | 0.66 |
| PRJNA533756 | SRR9705274 | Apis mellifera | single end | 2019 | 2016 | 2016 | Japan | Asia          | 18507565 | 8824795  | 47.68 | 634361 | 3.43 |
| PRJNA533756 | SRR9705275 | Apis mellifera | single end | 2019 | 2016 | 2016 | Japan | Asia          | 18081128 | 544815   | 3.01  | 122450 | 0.68 |
| PRJNA533756 | SRR9705276 | Apis mellifera | single end | 2019 | 2016 | 2016 | Japan | Asia          | 9524757  | 3034640  | 31.86 | 290782 | 3.05 |
| PRJNA533756 | SRR9705277 | Apis mellifera | single end | 2019 | 2016 | 2016 | Japan | Asia          | 12949070 | 8364     | 0.06  | 751    | 0.01 |
| PRJNA533756 | SRR9705278 | Apis mellifera | single end | 2019 | 2016 | 2016 | Japan | Asia          | 14797182 | 175613   | 1.19  | 25068  | 0.17 |
| PRJNA533756 | SRR9705279 | Apis mellifera | single end | 2019 | 2016 | 2016 | Japan | Asia          | 16299022 | 2229210  | 13.68 | 282308 | 1.73 |
| PRJNA533756 | SRR9705280 | Apis mellifera | single end | 2019 | 2016 | 2016 | Japan | Asia          | 13468117 | 522      | 0     | 65     | 0    |
| PRJNA533756 | SRR9705281 | Apis mellifera | single end | 2019 | 2016 | 2016 | Japan | Asia          | 17006643 | 97516    | 0.57  | 16713  | 0.1  |
| PRJNA533756 | SRR9705282 | Apis mellifera | single end | 2019 | 2016 | 2016 | Japan | Asia          | 13217665 | 1285755  | 9.73  | 155826 | 1.18 |
| PRJNA533756 | SRR9705283 | Apis mellifera | single end | 2019 | 2016 | 2016 | Japan | Asia          | 13644886 | 5991     | 0.04  | 689    | 0.01 |
| PRJNA533756 | SRR9705284 | Apis mellifera | single end | 2019 | 2016 | 2016 | Japan | Asia          | 19846028 | 1285     | 0.01  | 246    | 0    |
| PRJNA533756 | SRR9705285 | Apis mellifera | single end | 2019 | 2016 | 2016 | Japan | Asia          | 18126737 | 1862     | 0.01  | 299    | 0    |
| PRJNA533756 | SRR9705286 | Apis mellifera | single end | 2019 | 2016 | 2016 | Japan | Asia          | 9833589  | 1929     | 0.02  | 204    | 0    |
| PRJNA533756 | SRR9705287 | Apis mellifera | single end | 2019 | 2016 | 2016 | Japan | Asia          | 20463031 | 2576     | 0.01  | 439    | 0    |
| PRJNA533756 | SRR9705288 | Apis mellifera | single end | 2019 | 2016 | 2016 | Japan | Asia          | 19867944 | 1979     | 0.01  | 265    | 0    |
| PRJNA533756 | SRR9705289 | Apis mellifera | single end | 2019 | 2016 | 2016 | Japan | Asia          | 21583506 | 773      | 0     | 81     | 0    |
| PRJNA533756 | SRR9705290 | Apis mellifera | single end | 2019 | 2016 | 2016 | Japan | Asia          | 18186520 | 1965154  | 10.81 | 153299 | 0.84 |
| PRJNA533756 | SRR9705291 | Apis mellifera | single end | 2019 | 2016 | 2016 | Japan | Asia          | 19105467 | 692      | 0     | 85     | 0    |
| PRJNA533756 | SRR9705292 | Apis mellifera | single end | 2019 | 2016 | 2016 | Japan | Asia          | 22567200 | 81       | 0     | 9      | 0    |
| PRJNA533756 | SRR9705293 | Apis mellifera | single end | 2019 | 2016 | 2016 | Japan | Asia          | 16611456 | 195      | 0     | 31     | 0    |
| PRJNA533756 | SRR9705294 | Apis mellifera | single end | 2019 | 2016 | 2016 | Japan | Asia          | 14602711 | 979      | 0.01  | 164    | 0    |
| PRJNA533756 | SRR9705295 | Apis mellifera | single end | 2019 | 2016 | 2016 | Japan | Asia          | 20450423 | 215      | 0     | 42     | 0    |
| PRJNA533756 | SRR9705296 | Apis mellifera | single end | 2019 | 2016 | 2016 | Japan | Asia          | 15847281 | 820      | 0.01  | 79     | 0    |
| PRJNA533756 | SRR9705297 | Apis mellifera | single end | 2019 | 2016 | 2016 | Japan | Asia          | 19970892 | 78       | 0     | 13     | 0    |
| PRJNA533756 | SRR9705298 | Apis mellifera | single end | 2019 | 2016 | 2016 | Japan | Asia          | 20470983 | 744      | 0     | 104    | 0    |
| PRJNA533756 | SRR9705299 | Apis mellifera | single end | 2019 | 2016 | 2016 | Japan | Asia          | 19971631 | 1329     | 0.01  | 274    | 0    |
| PRJNA533756 | SRR9705300 | Apis mellifera | single end | 2019 | 2016 | 2016 | Japan | Asia          | 17354004 | 1027     | 0.01  | 136    | 0    |
| PRJNA533756 | SRR9705301 | Apis mellifera | single end | 2019 | 2016 | 2016 | Japan | Asia          | 21827705 | 719      | 0     | 70     | 0    |
| PRJNA533756 | SRR9705302 | Apis mellifera | single end | 2019 | 2016 | 2016 | Japan | Asia          | 15331276 | 216      | 0     | 18     | 0    |
| PRJNA533756 | SRR9705303 | Apis mellifera | single end | 2019 | 2016 | 2016 | Japan | Asia          | 15989008 | 1113     | 0.01  | 166    | 0    |
| PRJNA533756 | SRR9705304 | Apis mellifera | single end | 2019 | 2016 | 2016 | Japan | Asia          | 10118280 | 1484     | 0.01  | 265    | 0    |
| PRJNA533756 | SRR9705305 | Apis mellifera | single end | 2019 | 2016 | 2016 | Japan | Asia          | 16880583 | 3        | 0     | 1      | 0    |
| PRJNA533756 | SRR9705306 | Apis mellifera | single end | 2019 | 2016 | 2016 | Japan | Asia          | 18639647 | 1076     | 0.01  | 146    | 0    |
| PRJNA533756 | SRR9705307 | Apis mellifera | single end | 2019 | 2016 | 2016 | Japan | Asia          | 20556795 | 738877   | 3.59  | 61773  | 0.3  |
| PRJNA533756 | SRR9705308 | Apis mellifera | single end | 2019 | 2016 | 2016 | Japan | Asia          | 16754022 | 380      | 0     | 48     | 0    |
| PRJNA533756 | SRR9705309 | Apis mellifera | single end | 2019 | 2016 | 2016 | Japan | Asia          | 17077488 | 1328234  | 7.78  | 140867 | 0.82 |
| PRJNA533756 | SRR9705310 | Apis mellifera | single end | 2019 | 2016 | 2016 | Japan | Asia          | 17246845 | 1306     | 0.01  | 240    | 0    |
| PRJNA533756 | SRR9705311 | Apis mellifera | single end | 2019 | 2016 | 2016 | Japan | Asia          | 19929764 | 1022     | 0.01  | 167    | 0    |
| PRJNA533756 | SRR9705312 | Apis mellifera | single end | 2019 | 2016 | 2016 | Japan | Asia          | 16974357 | 39       | 0     | 9      | 0    |
| PRJNA219484 | SRR989674  | Apis mellifera | single end | 2015 | NA   | 2013 | NA    | NA            | 5386166  | 1992542  | 36.99 | 593    | 0.01 |
| PRJNA219484 | SRR989675  | Apis mellifera | single end | 2015 | NA   | 2013 | NA    | NA            | 3444202  | 3        | 0     | 0      | 0    |
| PRJNA219484 | SRR989676  | Apis mellifera | single end | 2015 | NA   | 2013 | NA    | NA            | 5810514  | 2595130  | 44.66 | 266    | 0    |
| PRJNA219484 | SRR989677  | Apis mellifera |            |      |      |      |       |               |          |          |       |        |      |

|             |             |                |            |      |      |      |           |               |           |         |       |         |       |
|-------------|-------------|----------------|------------|------|------|------|-----------|---------------|-----------|---------|-------|---------|-------|
| PRJEB35177  | ERR3632877  | Apis mellifera | paired end | 2020 | NA   | 2018 | NA        | NA            | 18647232  | 0       | 0     | 0       | 0     |
| PRJEB35177  | ERR3632878  | Apis mellifera | paired end | 2020 | NA   | 2018 | NA        | NA            | 14258288  | 0       | 0     | 1056    | 0.01  |
| PRJEB35177  | ERR3632879  | Apis mellifera | paired end | 2020 | NA   | 2018 | NA        | NA            | 17980672  | 48      | 0     | 4       | 0     |
| PRJEB35177  | ERR3632880  | Apis mellifera | paired end | 2020 | NA   | 2018 | NA        | NA            | 19762434  | 0       | 0     | 0       | 0     |
| PRJEB35177  | ERR3632881  | Apis mellifera | paired end | 2020 | NA   | 2018 | NA        | NA            | 16326394  | 0       | 0     | 0       | 0     |
| PRJEB35177  | ERR3632882  | Apis mellifera | paired end | 2020 | NA   | 2018 | NA        | NA            | 16516580  | 0       | 0     | 0       | 0     |
| PRJEB35177  | ERR3632883  | Apis mellifera | paired end | 2020 | NA   | 2018 | NA        | NA            | 23348800  | 0       | 0     | 0       | 0     |
| PRJEB35177  | ERR3632884  | Apis mellifera | paired end | 2020 | NA   | 2018 | NA        | NA            | 21523968  | 0       | 0     | 0       | 0     |
| PRJEB35177  | ERR3632885  | Apis mellifera | paired end | 2020 | NA   | 2018 | NA        | NA            | 18276218  | 0       | 0     | 0       | 0     |
| PRJEB35177  | ERR3632886  | Apis mellifera | paired end | 2020 | NA   | 2018 | NA        | NA            | 16118430  | 0       | 0     | 0       | 0     |
| PRJEB35177  | ERR3632887  | Apis mellifera | paired end | 2020 | NA   | 2018 | NA        | NA            | 15211364  | 0       | 0     | 0       | 0     |
| PRJNA564247 | SRR10078309 | Apis mellifera | paired end | 2020 | NA   | 2018 | NA        | NA            | 64846592  | 0       | 0     | 0       | 0     |
| PRJNA564247 | SRR10078310 | Apis mellifera | paired end | 2020 | NA   | 2018 | NA        | NA            | 56571686  | 0       | 0     | 0       | 0     |
| PRJNA564247 | SRR10078311 | Apis mellifera | paired end | 2020 | NA   | 2018 | NA        | NA            | 80281760  | 0       | 0     | 0       | 0     |
| PRJNA564247 | SRR10078312 | Apis mellifera | paired end | 2020 | NA   | 2018 | NA        | NA            | 56556090  | 0       | 0     | 0       | 0     |
| PRJNA564247 | SRR10078313 | Apis mellifera | paired end | 2020 | NA   | 2018 | NA        | NA            | 64968842  | 0       | 0     | 0       | 0     |
| PRJNA564247 | SRR10078314 | Apis mellifera | paired end | 2020 | NA   | 2018 | NA        | NA            | 82956694  | 0       | 0     | 0       | 0     |
| PRJNA564247 | SRR10078315 | Apis mellifera | paired end | 2020 | NA   | 2018 | NA        | NA            | 82016568  | 0       | 0     | 0       | 0     |
| PRJNA564247 | SRR10078316 | Apis mellifera | paired end | 2020 | NA   | 2018 | NA        | NA            | 76021434  | 0       | 0     | 0       | 0     |
| PRJNA564247 | SRR10078317 | Apis mellifera | paired end | 2020 | NA   | 2018 | NA        | NA            | 72417278  | 2       | 0     | 0       | 0     |
| PRJNA564247 | SRR10078318 | Apis mellifera | paired end | 2020 | NA   | 2018 | NA        | NA            | 65545512  | 0       | 0     | 0       | 0     |
| PRJNA575879 | SRR10231776 | Apis mellifera | paired end | 2019 | NA   | 2017 | USA       | North America | 16694920  | 3829760 | 22.94 | 1563    | 0.01  |
| PRJNA575879 | SRR10231787 | Apis mellifera | paired end | 2019 | NA   | 2017 | USA       | North America | 17586768  | 4033714 | 22.94 | 1537    | 0.01  |
| PRJNA575879 | SRR10231798 | Apis mellifera | paired end | 2019 | NA   | 2017 | USA       | North America | 15448916  | 48      | 0     | 648     | 0     |
| PRJNA575879 | SRR10231809 | Apis mellifera | paired end | 2019 | NA   | 2017 | USA       | North America | 16064920  | 29      | 0     | 334     | 0     |
| PRJNA575879 | SRR10231820 | Apis mellifera | paired end | 2019 | NA   | 2017 | USA       | North America | 15061152  | 69      | 0     | 855     | 0.01  |
| PRJNA575879 | SRR10231823 | Apis mellifera | paired end | 2019 | NA   | 2017 | USA       | North America | 18381088  | 1543    | 0.01  | 4186    | 0.02  |
| PRJNA575879 | SRR10231824 | Apis mellifera | paired end | 2019 | NA   | 2017 | USA       | North America | 18952582  | 1122    | 0.01  | 3608    | 0.02  |
| PRJNA575879 | SRR10231825 | Apis mellifera | paired end | 2019 | NA   | 2017 | USA       | North America | 17978628  | 2176    | 0.01  | 6141    | 0.03  |
| PRJNA575879 | SRR10231826 | Apis mellifera | paired end | 2019 | NA   | 2017 | USA       | North America | 18746926  | 1433    | 0.01  | 4214    | 0.02  |
| PRJNA575879 | SRR10231827 | Apis mellifera | paired end | 2019 | NA   | 2017 | USA       | North America | 18817368  | 6601    | 0.04  | 1637    | 0.01  |
| PRJNA575879 | SRR10231828 | Apis mellifera | paired end | 2019 | NA   | 2017 | USA       | North America | 19455452  | 6654    | 0.03  | 915     | 0     |
| PRJNA575879 | SRR10231829 | Apis mellifera | paired end | 2019 | NA   | 2017 | USA       | North America | 18402286  | 6740    | 0.04  | 2235    | 0.01  |
| PRJNA575879 | SRR10231830 | Apis mellifera | paired end | 2019 | NA   | 2017 | USA       | North America | 19240830  | 6490    | 0.03  | 1168    | 0.01  |
| PRJNA575879 | SRR10231831 | Apis mellifera | paired end | 2019 | NA   | 2017 | USA       | North America | 15844380  | 44      | 0     | 507     | 0     |
| PRJNA575879 | SRR10231832 | Apis mellifera | paired end | 2019 | NA   | 2017 | USA       | North America | 16025180  | 566     | 0     | 2192    | 0.01  |
| PRJNA575879 | SRR10231833 | Apis mellifera | paired end | 2019 | NA   | 2017 | USA       | North America | 16537662  | 411     | 0     | 1685    | 0.01  |
| PRJNA575879 | SRR10231834 | Apis mellifera | paired end | 2019 | NA   | 2017 | USA       | North America | 15685398  | 831     | 0.01  | 2790    | 0.02  |
| PRJNA575879 | SRR10231835 | Apis mellifera | paired end | 2019 | NA   | 2017 | USA       | North America | 16340458  | 595     | 0     | 2084    | 0.01  |
| PRJNA575879 | SRR10231836 | Apis mellifera | paired end | 2019 | NA   | 2017 | USA       | North America | 20783994  | 2903    | 0.01  | 5289    | 0.03  |
| PRJNA575879 | SRR10231837 | Apis mellifera | paired end | 2019 | NA   | 2017 | USA       | North America | 21599012  | 2599    | 0.01  | 5350    | 0.02  |
| PRJNA575879 | SRR10231838 | Apis mellifera | paired end | 2019 | NA   | 2017 | USA       | North America | 20281062  | 3742    | 0.02  | 6037    | 0.03  |
| PRJNA575879 | SRR10231839 | Apis mellifera | paired end | 2019 | NA   | 2017 | USA       | North America | 21345106  | 2570    | 0.01  | 5459    | 0.03  |
| PRJNA575879 | SRR10231840 | Apis mellifera | paired end | 2019 | NA   | 2017 | USA       | North America | 18128986  | 2094    | 0.01  | 31292   | 0.17  |
| PRJNA575879 | SRR10231841 | Apis mellifera | paired end | 2019 | NA   | 2017 | USA       | North America | 18951098  | 2409    | 0.01  | 36475   | 0.19  |
| PRJNA575879 | SRR10231842 | Apis mellifera | paired end | 2019 | NA   | 2017 | USA       | North America | 15522864  | 16096   | 0.1   | 1884466 | 12.14 |
| PRJNA575879 | SRR10231843 | Apis mellifera | paired end | 2019 | NA   | 2017 | USA       | North America | 17652400  | 2078    | 0.01  | 31026   | 0.18  |
| PRJNA575879 | SRR10231844 | Apis mellifera | paired end | 2019 | NA   | 2017 | USA       | North America | 18680394  | 2114    | 0.01  | 33863   | 0.18  |
| PRJNA575879 | SRR10231845 | Apis mellifera | paired end | 2019 | NA   | 2017 | USA       | North America | 16748274  | 104     | 0     | 2317    | 0.01  |
| PRJNA575879 | SRR10231846 | Apis mellifera | paired end | 2019 | NA   | 2017 | USA       | North America | 17404484  | 94      | 0     | 1581    | 0.01  |
| PRJNA575879 | SRR10231847 | Apis mellifera | paired end | 2019 | NA   | 2017 | USA       | North America | 16325936  | 114     | 0     | 3369    | 0.02  |
| PRJNA575879 | SRR10231848 | Apis mellifera | paired end | 2019 | NA   | 2017 | USA       | North America | 17180312  | 122     | 0     | 1927    | 0.01  |
| PRJNA575879 | SRR10231849 | Apis mellifera | paired end | 2019 | NA   | 2017 | USA       | North America | 13300192  | 3876254 | 29.14 | 7370940 | 55.42 |
| PRJNA575879 | SRR10231850 | Apis mellifera | paired end | 2019 | NA   | 2017 | USA       | North America | 13641982  | 3976360 | 29.15 | 7570660 | 55.5  |
| PRJNA575879 | SRR10231851 | Apis mellifera | paired end | 2019 | NA   | 2017 | USA       | North America | 13002764  | 3787080 | 29.13 | 7199220 | 55.37 |
| PRJNA575879 | SRR10231852 | Apis mellifera | paired end | 2019 | NA   | 2017 | USA       | North America | 13484998  | 3924860 | 29.11 | 7478980 | 55.46 |
| PRJNA575879 | SRR10231853 | Apis mellifera | paired end | 2019 | NA   | 2017 | USA       | North America | 16177306  | 15989   | 0.1   | 1968892 | 12.17 |
| PRJNA575879 | SRR10231854 | Apis mellifera | paired end | 2019 | NA   | 2017 | USA       | North America | 17204424  | 8646    | 0.05  | 4252040 | 24.71 |
| PRJNA575879 | SRR10231855 | Apis mellifera | paired end | 2019 | NA   | 2017 | USA       | North America | 17764458  | 8645    | 0.05  | 4391320 | 24.72 |
| PRJNA575879 | SRR10231856 | Apis mellifera | paired end | 2019 | NA   | 2017 | USA       | North America | 16787430  | 8238    | 0.05  | 4147660 | 24.71 |
| PRJNA575879 | SRR10231857 | Apis mellifera | paired end | 2019 | NA   | 2017 | USA       | North America | 17559002  | 8595    | 0.05  | 4333696 | 24.68 |
| PRJNA575879 | SRR10231858 | Apis mellifera | paired end | 2019 | NA   | 2017 | USA       | North America | 14210014  | 22620   | 0.16  | 8872980 | 62.44 |
| PRJNA575879 | SRR10231859 | Apis mellifera | paired end | 2019 | NA   | 2017 | USA       | North America | 14639796  | 26385   | 0.18  | 9136640 | 62.41 |
| PRJNA575879 | SRR10231860 | Apis mellifera | paired end | 2019 | NA   | 2017 | USA       | North America | 13884640  | 23754   | 0.17  | 8644578 | 62.26 |
| PRJNA575879 | SRR10231861 | Apis mellifera | paired end | 2019 | NA   | 2017 | USA       | North America | 14480222  | 25284   | 0.17  | 9031140 | 62.37 |
| PRJNA575879 | SRR10231862 | Apis mellifera | paired end | 2019 | NA   | 2017 | USA       | North America | 17136568  | 3939960 | 22.99 | 1478    | 0.01  |
| PRJNA575879 | SRR10231863 | Apis mellifera | paired end | 2019 | NA   | 2017 | USA       | North America | 17801904  | 4090900 | 22.98 | 1555    | 0.01  |
| PRJNA575879 | SRR10231864 | Apis mellifera | paired end | 2019 | NA   | 2017 | USA       | North America | 15102388  | 15820   | 0.1   | 1836206 | 12.16 |
| PRJNA575879 | SRR10231865 | Apis mellifera | paired end | 2019 | NA   | 2017 | USA       | North America | 15973522  | 15948   | 0.1   | 1941292 | 12.15 |
| PRJNA587756 | SRR10397460 | Apis mellifera | paired end | 2020 | 2018 | 2018 | Argentina | South America | 43968980  | 0       | 0     | 0       | 0     |
| PRJNA587756 | SRR10397461 | Apis mellifera | paired end | 2020 | 2018 | 2018 | Argentina | South America | 44497750  | 0       | 0     | 0       | 0     |
| PRJNA587756 | SRR10397462 | Apis mellifera | paired end | 2020 | 2018 | 2018 | Argentina | South America | 48663970  | 0       | 0     | 0       | 0     |
| PRJNA587756 | SRR10397463 | Apis mellifera | paired end | 2020 | 2018 | 2018 | Argentina | South America | 46433414  | 0       | 0     | 0       | 0     |
| PRJNA587756 | SRR10397464 | Apis mellifera | paired end | 2020 | 2018 | 2018 | Argentina | South America | 44856508  | 0       | 0     | 0       | 0     |
| PRJNA587756 | SRR10397465 | Apis mellifera | paired end | 2020 | 2018 | 2018 | Argentina | South America | 52816588  | 0       | 0     | 0       | 0     |
| PRJNA601517 | SRR10901285 | Apis mellifera | paired end | 2021 | 2013 | 2013 | USA       | North America | 129474798 | 71      | 0     | 4       | 0     |
| PRJNA601517 | SRR10901286 | Apis mellifera | paired end | 2021 | 2013 | 2013 | USA       | North America | 28205978  | 18      | 0     | 2       | 0     |
| PRJNA601517 | SRR10901287 | Apis mellifera | paired end | 2021 | 2013 | 2013 | USA       | North America | 9381356   | 0       | 0     | 0       | 0     |
| PRJNA601517 | SRR10901288 | Apis mellifera | paired end | 2021 | 2013 | 2013 | USA       | North America | 18124744  | 4       | 0     | 0       | 0     |
| PRJNA601517 | SRR10901289 | Apis mellifera | paired end | 2021 | 2013 | 2013 | USA       | North America | 25663268  | 0       | 0     | 0       | 0     |
| PRJNA601517 | SRR10901290 | Apis mellifera | paired end | 2021 | 2013 | 2013 | USA       | North America | 25453714  | 30      | 0     | 0       | 0     |
| PRJNA601517 | SRR10901291 | Apis mellifera | paired end | 2021 | 2013 | 2013 | USA       | North America | 26050876  | 0       | 0     | 0       | 0     |
| PRJNA601517 | SRR10901292 | Apis mellifera | paired end | 2021 | 2013 | 2013 | USA       | North America | 27291634  | 2       | 0     | 0       | 0     |
| PRJNA601517 | SRR10901293 | Apis mellifera | paired end | 2021 | 2013 | 2013 | USA       | North America | 37320976  | 16      | 0     | 8       | 0     |
| PRJNA601517 | SRR10901294 | Apis mellifera | paired end | 2021 | 2013 | 2013 | USA       | North America | 28481710  | 0       | 0     | 0       | 0     |
| PRJNA601517 | SRR10901295 | Apis mellifera | paired end | 2021 | 2013 | 2013 | USA       | North America | 26106168  | 0       | 0     | 0       | 0     |
| PRJNA601517 | SRR10901296 | Apis mellifera | paired end | 2021 | 2013 | 2013 | USA       | North America | 20240570  | 12      | 0     | 0       | 0     |
| PRJNA601517 | SRR10901297 | Apis mellifera | paired end | 2021 | 2013 | 2013 | USA       | North America | 21654688  | 0       | 0     | 0       | 0     |
| PRJNA601517 | SRR10901298 | Apis mellifera | paired end | 2021 | 2013 | 2013 | USA       | North America | 29363428  | 0       | 0     | 0       | 0     |
| PRJNA601517 | SRR10901299 | Apis mellifera | paired end | 2021 | 2013 | 2013 | USA       | North America | 23795162  | 0       | 0     | 0       | 0     |
| PRJNA601517 | SRR10901300 | Apis mellifera | paired end | 2021 | 2013 | 2013 | USA       | North America | 25814386  | 0       | 0     | 0       | 0     |
| PRJNA601517 | SRR10901301 | Apis mellifera | paired end | 2021 | 2013 | 2013 | USA       | North America | 27015926  | 4       | 0     | 0       | 0     |
| PRJNA601517 | SRR10901302 | Apis mellifera | paired end | 2021 | 2013 | 2013 | USA       | North America | 24371408  | 18      | 0     | 2       | 0     |
| PRJNA601517 | SRR10901303 | Apis mellifera | paired end | 2021 | 2013 | 2013 | USA       | North America | 130931962 | 10      | 0     | 2       | 0     |
| PRJNA601517 | SRR10901304 | Apis mellifera | paired end | 2021 | 2013 | 2013 | USA       | North America | 2279      |         |       |         |       |

|             |             |                |            |      |      |      |                  |               |           |          |       |         |      |
|-------------|-------------|----------------|------------|------|------|------|------------------|---------------|-----------|----------|-------|---------|------|
| PRJNA602047 | SRR10912944 | Apis mellifera | paired end | 2020 | NA   | 2018 | NA               | NA            | 54047242  | 134      | 0     | 0       | 0    |
| PRJNA602047 | SRR10912945 | Apis mellifera | paired end | 2020 | NA   | 2018 | NA               | NA            | 58876422  | 0        | 0     | 0       | 0    |
| PRJNA613391 | SRR11349374 | Apis mellifera | paired end | 2020 | 2017 | 2017 | Australia        | Oceania       | 71907920  | 0        | 0     | 0       | 0    |
| PRJNA628981 | SRR11634539 | Apis mellifera | paired end | 2021 | 2018 | 2018 | UK               | Europe        | 61343190  | 5044     | 0.01  | 91304   | 0.15 |
| PRJNA628981 | SRR11634540 | Apis mellifera | paired end | 2021 | 2018 | 2018 | UK               | Europe        | 52203232  | 1793     | 0     | 2821    | 0.01 |
| PRJNA628981 | SRR11634541 | Apis mellifera | paired end | 2021 | 2018 | 2018 | UK               | Europe        | 63255904  | 1155     | 0     | 29858   | 0.05 |
| PRJNA628981 | SRR11634542 | Apis mellifera | paired end | 2021 | 2018 | 2018 | UK               | Europe        | 69974472  | 237      | 0     | 549     | 0    |
| PRJNA628981 | SRR11634543 | Apis mellifera | paired end | 2021 | 2018 | 2018 | UK               | Europe        | 53742100  | 514      | 0     | 2479    | 0    |
| PRJNA628981 | SRR11634544 | Apis mellifera | paired end | 2021 | 2018 | 2018 | UK               | Europe        | 54341492  | 3550     | 0.01  | 2223    | 0    |
| PRJNA628981 | SRR11634545 | Apis mellifera | paired end | 2021 | 2018 | 2018 | UK               | Europe        | 65505056  | 6105     | 0.01  | 1922    | 0    |
| PRJNA628981 | SRR11634546 | Apis mellifera | paired end | 2021 | 2018 | 2018 | UK               | Europe        | 56016440  | 620      | 0     | 932     | 0    |
| PRJNA628981 | SRR11634547 | Apis mellifera | paired end | 2021 | 2018 | 2018 | UK               | Europe        | 66744350  | 7274     | 0.01  | 10833   | 0.02 |
| PRJNA630027 | SRR11671127 | Apis mellifera | paired end | 2020 | NA   | 2018 | NA               | NA            | 82767632  | 150      | 0     | 8       | 0    |
| PRJNA630027 | SRR11671128 | Apis mellifera | paired end | 2020 | NA   | 2018 | NA               | NA            | 79728078  | 786      | 0     | 511     | 0    |
| PRJNA630027 | SRR11671129 | Apis mellifera | paired end | 2020 | NA   | 2018 | NA               | NA            | 98928126  | 37290    | 0.04  | 10      | 0    |
| PRJNA630027 | SRR11671130 | Apis mellifera | paired end | 2020 | NA   | 2018 | NA               | NA            | 88630708  | 68       | 0     | 12      | 0    |
| PRJNA630027 | SRR11671131 | Apis mellifera | paired end | 2020 | NA   | 2018 | NA               | NA            | 74555736  | 14107    | 0.02  | 16      | 0    |
| PRJNA630027 | SRR11671132 | Apis mellifera | paired end | 2020 | NA   | 2018 | NA               | NA            | 85472672  | 178      | 0     | 38      | 0    |
| PRJNA630027 | SRR11671133 | Apis mellifera | paired end | 2020 | NA   | 2018 | NA               | NA            | 71933302  | 4457     | 0.01  | 803     | 0    |
| PRJNA630027 | SRR11671134 | Apis mellifera | paired end | 2020 | NA   | 2018 | NA               | NA            | 94430180  | 10273    | 0.01  | 224     | 0    |
| PRJNA238833 | SRR1182310  | Apis mellifera | paired end | 2014 | NA   | 2012 | NA               | NA            | 51534456  | 4096060  | 7.95  | 50924   | 0.1  |
| PRJNA238833 | SRR1182312  | Apis mellifera | paired end | 2014 | NA   | 2012 | NA               | NA            | 43564950  | 3894360  | 8.94  | 7109    | 0.02 |
| PRJNA238833 | SRR1182313  | Apis mellifera | paired end | 2014 | NA   | 2012 | NA               | NA            | 75458732  | 10835    | 0.01  | 879     | 0    |
| PRJNA240064 | SRR1182528  | Apis mellifera | paired end | 2014 | 2011 | 2011 | USA              | North America | 17205992  | 3562456  | 20.7  | 10089   | 0.06 |
| PRJNA240064 | SRR1182529  | Apis mellifera | paired end | 2014 | 2011 | 2011 | USA              | North America | 21147498  | 2880876  | 13.62 | 9169    | 0.04 |
| PRJNA240064 | SRR1182578  | Apis mellifera | paired end | 2014 | 2011 | 2011 | USA              | North America | 30871554  | 3024034  | 9.8   | 9008    | 0.03 |
| PRJNA240064 | SRR1182579  | Apis mellifera | paired end | 2014 | 2011 | 2011 | USA              | North America | 21556600  | 4670396  | 21.67 | 12111   | 0.06 |
| PRJNA240064 | SRR1182580  | Apis mellifera | paired end | 2014 | 2011 | 2011 | USA              | North America | 32012050  | 5587920  | 17.46 | 17042   | 0.05 |
| PRJNA240064 | SRR1182581  | Apis mellifera | paired end | 2014 | 2011 | 2011 | USA              | North America | 16131564  | 2452148  | 15.2  | 6439    | 0.04 |
| PRJNA240064 | SRR1182637  | Apis mellifera | paired end | 2014 | 2011 | 2011 | USA              | North America | 51410174  | 3283728  | 6.39  | 7725    | 0.02 |
| PRJNA240064 | SRR1182638  | Apis mellifera | paired end | 2014 | 2011 | 2011 | USA              | North America | 19401608  | 3510290  | 18.09 | 8401    | 0.04 |
| PRJNA240064 | SRR1182639  | Apis mellifera | paired end | 2014 | 2011 | 2011 | USA              | North America | 17642008  | 2911920  | 16.51 | 8315    | 0.05 |
| PRJNA240064 | SRR1182640  | Apis mellifera | paired end | 2014 | 2011 | 2011 | USA              | North America | 22318092  | 1528260  | 6.85  | 3377    | 0.02 |
| PRJNA240064 | SRR1182641  | Apis mellifera | paired end | 2014 | 2011 | 2011 | USA              | North America | 24240944  | 4591680  | 18.94 | 10799   | 0.04 |
| PRJNA240064 | SRR1182642  | Apis mellifera | paired end | 2014 | 2011 | 2011 | USA              | North America | 16972664  | 4137820  | 24.38 | 10955   | 0.06 |
| PRJNA635960 | SRR11879879 | Apis mellifera | paired end | 2020 | 2014 | 2014 | Solomon_Islands  | Oceania       | 122615250 | 414      | 0     | 139     | 0    |
| PRJNA635960 | SRR11879880 | Apis mellifera | paired end | 2020 | 2014 | 2014 | Papua_New_Guinea | Oceania       | 104622470 | 0        | 0     | 14      | 0    |
| PRJNA636804 | SRR11940309 | Apis mellifera | paired end | 2020 | 2018 | 2018 | Germany          | Europe        | 206457564 | 0        | 0     | 0       | 0    |
| PRJNA636804 | SRR11940310 | Apis mellifera | paired end | 2020 | 2018 | 2018 | Germany          | Europe        | 214681890 | 0        | 0     | 0       | 0    |
| PRJNA636804 | SRR11940311 | Apis mellifera | paired end | 2020 | 2018 | 2018 | Germany          | Europe        | 218349306 | 0        | 0     | 0       | 0    |
| PRJNA639933 | SRR12031953 | Apis mellifera | paired end | 2020 | 2019 | 2019 | China            | Asia          | 43346592  | 0        | 0     | 0       | 0    |
| PRJNA639933 | SRR12031954 | Apis mellifera | paired end | 2020 | 2019 | 2019 | China            | Asia          | 41601872  | 0        | 0     | 0       | 0    |
| PRJNA639933 | SRR12031955 | Apis mellifera | paired end | 2020 | 2019 | 2019 | China            | Asia          | 44479454  | 0        | 0     | 0       | 0    |
| PRJNA639933 | SRR12031956 | Apis mellifera | paired end | 2020 | 2019 | 2019 | China            | Asia          | 74266086  | 0        | 0     | 0       | 0    |
| PRJNA639933 | SRR12031957 | Apis mellifera | paired end | 2020 | 2019 | 2019 | China            | Asia          | 63055150  | 0        | 0     | 0       | 0    |
| PRJNA639933 | SRR12031958 | Apis mellifera | paired end | 2020 | 2019 | 2019 | China            | Asia          | 79322368  | 0        | 0     | 0       | 0    |
| PRJNA639933 | SRR12031959 | Apis mellifera | paired end | 2020 | 2019 | 2019 | China            | Asia          | 73968648  | 0        | 0     | 0       | 0    |
| PRJNA639933 | SRR12031960 | Apis mellifera | paired end | 2020 | 2019 | 2019 | China            | Asia          | 69434358  | 0        | 0     | 0       | 0    |
| PRJNA639933 | SRR12031961 | Apis mellifera | paired end | 2020 | 2019 | 2019 | China            | Asia          | 44663500  | 0        | 0     | 0       | 0    |
| PRJNA639933 | SRR12031962 | Apis mellifera | paired end | 2020 | 2019 | 2019 | China            | Asia          | 50303700  | 0        | 0     | 0       | 0    |
| PRJNA639933 | SRR12031963 | Apis mellifera | paired end | 2020 | 2019 | 2019 | China            | Asia          | 42710574  | 0        | 0     | 0       | 0    |
| PRJNA639933 | SRR12031964 | Apis mellifera | paired end | 2020 | 2019 | 2019 | China            | Asia          | 49704788  | 0        | 0     | 0       | 0    |
| PRJNA639933 | SRR12031965 | Apis mellifera | paired end | 2020 | 2019 | 2019 | China            | Asia          | 59051322  | 0        | 0     | 0       | 0    |
| PRJNA639933 | SRR12031966 | Apis mellifera | paired end | 2020 | 2019 | 2019 | China            | Asia          | 51542312  | 0        | 0     | 0       | 0    |
| PRJNA639933 | SRR12031967 | Apis mellifera | paired end | 2020 | 2019 | 2019 | China            | Asia          | 41238792  | 0        | 0     | 0       | 0    |
| PRJNA639933 | SRR12031968 | Apis mellifera | paired end | 2020 | 2019 | 2019 | China            | Asia          | 45676858  | 0        | 0     | 0       | 0    |
| PRJNA639933 | SRR12031969 | Apis mellifera | paired end | 2020 | 2019 | 2019 | China            | Asia          | 97593694  | 0        | 0     | 0       | 0    |
| PRJNA639933 | SRR12031970 | Apis mellifera | paired end | 2020 | 2019 | 2019 | China            | Asia          | 58203126  | 0        | 0     | 0       | 0    |
| PRJNA243651 | SRR1239302  | Apis mellifera | paired end | 2014 | NA   | 2012 | USA              | North America | 64110330  | 27823164 | 43.4  | 2185880 | 3.41 |
| PRJNA243651 | SRR1239303  | Apis mellifera | paired end | 2014 | NA   | 2012 | USA              | North America | 73361990  | 852720   | 1.16  | 1685    | 0    |
| PRJNA243651 | SRR1239304  | Apis mellifera | paired end | 2014 | NA   | 2012 | USA              | North America | 68187072  | 1606720  | 2.36  | 2751    | 0    |
| PRJNA243651 | SRR1239305  | Apis mellifera | paired end | 2014 | NA   | 2012 | USA              | North America | 68058182  | 1109286  | 1.63  | 2148    | 0    |
| PRJNA243651 | SRR1239306  | Apis mellifera | paired end | 2014 | NA   | 2012 | USA              | North America | 67841628  | 1551236  | 2.29  | 2399    | 0    |
| PRJNA243651 | SRR1239307  | Apis mellifera | paired end | 2014 | NA   | 2012 | USA              | North America | 78770592  | 22073000 | 28.02 | 19045   | 0.02 |
| PRJNA243651 | SRR1239308  | Apis mellifera | paired end | 2014 | NA   | 2012 | USA              | North America | 42519996  | 8189     | 0.02  | 774     | 0    |
| PRJNA243651 | SRR1239309  | Apis mellifera | paired end | 2014 | NA   | 2012 | USA              | North America | 45329928  | 13898    | 0.03  | 509     | 0    |
| PRJNA243651 | SRR1239310  | Apis mellifera | paired end | 2014 | NA   | 2012 | USA              | North America | 54545576  | 7454     | 0.01  | 525     | 0    |
| PRJNA243651 | SRR1239311  | Apis mellifera | paired end | 2014 | NA   | 2012 | USA              | North America | 51534456  | 4096060  | 7.95  | 50924   | 0.1  |
| PRJNA243651 | SRR1239312  | Apis mellifera | paired end | 2014 | NA   | 2012 | USA              | North America | 43564950  | 3894360  | 8.94  | 7109    | 0.02 |
| PRJNA243651 | SRR1239313  | Apis mellifera | paired end | 2014 | NA   | 2012 | USA              | North America | 75458732  | 10835    | 0.01  | 879     | 0    |
| PRJNA656275 | SRR12424195 | Apis mellifera | paired end | 2021 | NA   | 2019 | USA              | North America | 26824402  | 2160     | 0.01  | 44      | 0    |
| PRJNA656275 | SRR12424196 | Apis mellifera | paired end | 2021 | NA   | 2019 | USA              | North America | 27295078  | 1957     | 0.01  | 56      | 0    |
| PRJNA656275 | SRR12424197 | Apis mellifera | paired end | 2021 | NA   | 2019 | USA              | North America | 31239038  | 4013     | 0.01  | 118     | 0    |
| PRJNA656275 | SRR12424198 | Apis mellifera | paired end | 2021 | NA   | 2019 | USA              | North America | 31927636  | 4199     | 0.01  | 93      | 0    |
| PRJNA656275 | SRR12424199 | Apis mellifera | paired end | 2021 | NA   | 2019 | USA              | North America | 25491530  | 25421    | 0.1   | 801     | 0    |
| PRJNA656275 | SRR12424200 | Apis mellifera | paired end | 2021 | NA   | 2019 | USA              | North America | 25990288  | 25709    | 0.1   | 832     | 0    |
| PRJNA656275 | SRR12424201 | Apis mellifera | paired end | 2021 | NA   | 2019 | USA              | North America | 31674260  | 1419     | 0     | 38      | 0    |
| PRJNA656275 | SRR12424202 | Apis mellifera | paired end | 2021 | NA   | 2019 | USA              | North America | 32186808  | 1371     | 0     | 36      | 0    |
| PRJNA656275 | SRR12424203 | Apis mellifera | paired end | 2021 | NA   | 2019 | USA              | North America | 28592338  | 1024     | 0     | 14      | 0    |
| PRJNA656275 | SRR12424204 | Apis mellifera | paired end | 2021 | NA   | 2019 | USA              | North America | 29158804  | 1021     | 0     | 29      | 0    |
| PRJNA656275 | SRR12424205 | Apis mellifera | paired end | 2021 | NA   | 2019 | USA              | North America | 26534786  | 1611     | 0.01  | 29      | 0    |
| PRJNA656275 | SRR12424206 | Apis mellifera | paired end | 2021 | NA   | 2019 | USA              | North America | 27108340  | 1577     | 0.01  | 28      | 0    |
| PRJNA656275 | SRR12424207 | Apis mellifera | paired end | 2021 | NA   | 2019 | USA              | North America | 30517992  | 1401     | 0     | 25      | 0    |
| PRJNA656275 | SRR12424208 | Apis mellifera | paired end | 2021 | NA   | 2019 | USA              | North America | 31328464  | 1457     | 0     | 45      | 0    |
| PRJNA656275 | SRR12424209 | Apis mellifera | paired end | 2021 | NA   | 2019 | USA              | North America | 28068980  | 1787     | 0.01  | 58      | 0    |
| PRJNA656275 | SRR12424210 | Apis mellifera | paired end | 2021 | NA   | 2019 | USA              | North America | 28491660  | 1734     | 0.01  | 44      | 0    |
| PRJNA656275 | SRR12424211 | Apis mellifera | paired end | 2021 | NA   | 2019 | USA              | North America | 27878866  | 1733     | 0.01  | 59      | 0    |
| PRJNA656275 | SRR12424212 | Apis mellifera | paired end | 2021 | NA   | 2019 | USA              | North America | 28307228  | 1644     | 0.01  | 46      | 0    |
| PRJNA656275 | SRR12424213 | Apis mellifera | paired end | 2021 | NA   | 2019 | USA              | North America | 28472220  | 2639     | 0.01  | 75      | 0    |
| PRJNA656275 | SRR12424214 | Apis mellifera | paired end | 2021 | NA   | 2019 | USA              | North America | 28999614  | 2537     | 0.01  | 66      | 0    |
| PRJNA656275 | SRR12424215 | Apis mellifera | paired end | 2021 | NA   | 2019 | USA              | North America | 28932050  | 1306     | 0     | 33      | 0    |
| PRJNA656275 | SRR12424216 | Apis mellifera | paired end | 2021 | NA   | 2019 | USA              | North America | 29401788  | 1341     | 0     | 26      | 0    |
| PRJNA656275 | SRR12424217 | Apis mellifera | paired end | 2021 | NA   | 2019 | USA              | North America | 25868560  | 1885     | 0.01  | 50      | 0    |
| PRJNA656275 | SRR12424218 | Apis mellifera | paired end | 2021 | NA   | 2019 | USA              | North America | 26440660  | 1894     | 0.01  | 26      | 0    |
| PRJNA656275 | SRR12       |                |            |      |      |      |                  |               |           |          |       |         |      |

|             |             |                |            |      |      |      |     |               |           |          |       |         |      |
|-------------|-------------|----------------|------------|------|------|------|-----|---------------|-----------|----------|-------|---------|------|
| PRJNA656275 | SRR12424231 | Apis mellifera | paired end | 2021 | NA   | 2019 | USA | North America | 38524308  | 1885     | 0     | 32      | 0    |
| PRJNA656275 | SRR12424232 | Apis mellifera | paired end | 2021 | NA   | 2019 | USA | North America | 39554956  | 1604     | 0     | 38      | 0    |
| PRJNA656275 | SRR12424233 | Apis mellifera | paired end | 2021 | NA   | 2019 | USA | North America | 27844884  | 987      | 0     | 20      | 0    |
| PRJNA656275 | SRR12424234 | Apis mellifera | paired end | 2021 | NA   | 2019 | USA | North America | 28631068  | 937      | 0     | 20      | 0    |
| PRJNA656275 | SRR12424235 | Apis mellifera | paired end | 2021 | NA   | 2019 | USA | North America | 30513864  | 1560     | 0.01  | 24      | 0    |
| PRJNA656275 | SRR12424236 | Apis mellifera | paired end | 2021 | NA   | 2019 | USA | North America | 31346664  | 1413     | 0     | 35      | 0    |
| PRJNA656275 | SRR12424237 | Apis mellifera | paired end | 2021 | NA   | 2019 | USA | North America | 31528374  | 2350     | 0.01  | 41      | 0    |
| PRJNA656275 | SRR12424238 | Apis mellifera | paired end | 2021 | NA   | 2019 | USA | North America | 32334468  | 2354     | 0.01  | 44      | 0    |
| PRJNA656275 | SRR12424239 | Apis mellifera | paired end | 2021 | NA   | 2019 | USA | North America | 35191578  | 23482    | 0.07  | 685     | 0    |
| PRJNA656275 | SRR12424240 | Apis mellifera | paired end | 2021 | NA   | 2019 | USA | North America | 35853754  | 24009    | 0.07  | 776     | 0    |
| PRJNA656275 | SRR12424241 | Apis mellifera | paired end | 2021 | NA   | 2019 | USA | North America | 30981112  | 1077     | 0     | 20      | 0    |
| PRJNA656275 | SRR12424242 | Apis mellifera | paired end | 2021 | NA   | 2019 | USA | North America | 31792990  | 1108     | 0     | 33      | 0    |
| PRJNA243651 | SRR1254946  | Apis mellifera | paired end | 2014 | NA   | 2012 | USA | North America | 84696498  | 3534     | 0     | 56      | 0    |
| PRJNA243651 | SRR1254947  | Apis mellifera | paired end | 2014 | NA   | 2012 | USA | North America | 71604084  | 303116   | 0.42  | 770     | 0    |
| PRJNA243651 | SRR1254948  | Apis mellifera | paired end | 2014 | NA   | 2012 | USA | North America | 100771288 | 5817     | 0.01  | 94      | 0    |
| PRJNA243651 | SRR1254950  | Apis mellifera | paired end | 2014 | NA   | 2012 | USA | North America | 68152256  | 7646840  | 11.22 | 829784  | 1.22 |
| PRJNA243651 | SRR1254951  | Apis mellifera | paired end | 2014 | NA   | 2012 | USA | North America | 99894982  | 8788948  | 8.8   | 25126   | 0.03 |
| PRJNA243651 | SRR1254952  | Apis mellifera | paired end | 2014 | NA   | 2012 | USA | North America | 87014454  | 3774940  | 4.34  | 10125   | 0.01 |
| PRJNA243651 | SRR1254954  | Apis mellifera | paired end | 2014 | NA   | 2012 | USA | North America | 102186182 | 7752     | 0.01  | 90      | 0    |
| PRJNA243651 | SRR1254956  | Apis mellifera | paired end | 2014 | NA   | 2012 | USA | North America | 95800088  | 87758    | 0.09  | 199     | 0    |
| PRJNA243651 | SRR1254957  | Apis mellifera | paired end | 2014 | NA   | 2012 | USA | North America | 78254338  | 1075500  | 1.37  | 2244    | 0    |
| PRJNA243651 | SRR1254958  | Apis mellifera | paired end | 2014 | NA   | 2012 | USA | North America | 100449442 | 10808280 | 10.76 | 32560   | 0.03 |
| PRJNA243651 | SRR1254959  | Apis mellifera | paired end | 2014 | NA   | 2012 | USA | North America | 88821448  | 1154870  | 1.3   | 7233    | 0.01 |
| PRJNA243651 | SRR1254960  | Apis mellifera | paired end | 2014 | NA   | 2012 | USA | North America | 85473762  | 9869460  | 11.55 | 20850   | 0.02 |
| PRJNA243651 | SRR1255009  | Apis mellifera | paired end | 2014 | NA   | 2012 | USA | North America | 56342908  | 795114   | 1.41  | 37029   | 0.07 |
| PRJNA243651 | SRR1255010  | Apis mellifera | paired end | 2014 | NA   | 2012 | USA | North America | 80527564  | 19474    | 0.02  | 440     | 0    |
| PRJNA243651 | SRR1255011  | Apis mellifera | paired end | 2014 | NA   | 2012 | USA | North America | 113374830 | 5201300  | 4.59  | 7600    | 0.01 |
| PRJNA243651 | SRR1255012  | Apis mellifera | paired end | 2014 | NA   | 2012 | USA | North America | 59049388  | 7979264  | 13.51 | 484424  | 0.82 |
| PRJNA243651 | SRR1255013  | Apis mellifera | paired end | 2014 | NA   | 2012 | USA | North America | 63975208  | 3380922  | 5.28  | 7098    | 0.01 |
| PRJNA243651 | SRR1255014  | Apis mellifera | paired end | 2014 | NA   | 2012 | USA | North America | 116391070 | 21193842 | 18.21 | 25770   | 0.02 |
| PRJNA243651 | SRR1255064  | Apis mellifera | paired end | 2014 | NA   | 2012 | USA | North America | 104850402 | 6346506  | 6.05  | 9435    | 0.01 |
| PRJNA243651 | SRR1255065  | Apis mellifera | paired end | 2014 | NA   | 2012 | USA | North America | 68997582  | 15535    | 0.02  | 314     | 0    |
| PRJNA243651 | SRR1255066  | Apis mellifera | paired end | 2014 | NA   | 2012 | USA | North America | 60957858  | 26367    | 0.04  | 382     | 0    |
| PRJNA243651 | SRR1255068  | Apis mellifera | paired end | 2014 | NA   | 2012 | USA | North America | 72782026  | 21679800 | 29.79 | 1577332 | 2.17 |
| PRJNA243651 | SRR1255149  | Apis mellifera | paired end | 2014 | NA   | 2012 | USA | North America | 68118350  | 3485340  | 5.12  | 4063    | 0.01 |
| PRJNA243651 | SRR1255150  | Apis mellifera | paired end | 2014 | NA   | 2012 | USA | North America | 58141740  | 17579700 | 30.24 | 16476   | 0.03 |
| PRJNA243651 | SRR1255151  | Apis mellifera | paired end | 2014 | NA   | 2012 | USA | North America | 59131754  | 5422     | 0.01  | 219     | 0    |
| PRJNA243651 | SRR1255152  | Apis mellifera | paired end | 2014 | NA   | 2012 | USA | North America | 68500084  | 1728416  | 2.52  | 2192    | 0    |
| PRJNA243651 | SRR1255153  | Apis mellifera | paired end | 2014 | NA   | 2012 | USA | North America | 71890206  | 3656020  | 5.09  | 6414    | 0.01 |
| PRJNA243651 | SRR1255154  | Apis mellifera | paired end | 2014 | NA   | 2012 | USA | North America | 58745720  | 19965820 | 33.99 | 1779912 | 3.03 |
| PRJNA243651 | SRR1255260  | Apis mellifera | paired end | 2014 | NA   | 2012 | USA | North America | 86045054  | 4637180  | 5.39  | 5140    | 0.01 |
| PRJNA243651 | SRR1255326  | Apis mellifera | paired end | 2014 | NA   | 2012 | USA | North America | 70998226  | 13539896 | 19.07 | 18682   | 0.03 |
| PRJNA243651 | SRR1255456  | Apis mellifera | paired end | 2014 | NA   | 2012 | USA | North America | 53098508  | 25777550 | 48.55 | 2684676 | 5.06 |
| PRJNA243651 | SRR1255541  | Apis mellifera | paired end | 2014 | NA   | 2012 | USA | North America | 68678890  | 61437    | 0.09  | 287508  | 0.42 |
| PRJNA243651 | SRR1255542  | Apis mellifera | paired end | 2014 | NA   | 2012 | USA | North America | 73889574  | 1545     | 0     | 103     | 0    |
| PRJNA243651 | SRR1255543  | Apis mellifera | paired end | 2014 | NA   | 2012 | USA | North America | 69568686  | 1251     | 0     | 77      | 0    |
| PRJNA243651 | SRR1255544  | Apis mellifera | paired end | 2014 | NA   | 2012 | USA | North America | 65110644  | 622      | 0     | 51      | 0    |
| PRJNA243651 | SRR1255545  | Apis mellifera | paired end | 2014 | NA   | 2012 | USA | North America | 74756862  | 1266     | 0     | 96      | 0    |
| PRJNA243651 | SRR1255546  | Apis mellifera | paired end | 2014 | NA   | 2012 | USA | North America | 63355332  | 4601934  | 7.26  | 12599   | 0.02 |
| PRJNA663557 | SRR12659846 | Apis mellifera | paired end | 2020 | 2020 | 2020 | USA | North America | 132101622 | 2        | 0     | 0       | 0    |
| PRJNA663557 | SRR12659847 | Apis mellifera | paired end | 2020 | 2020 | 2020 | USA | North America | 148296726 | 4        | 0     | 0       | 0    |
| PRJNA663557 | SRR12659848 | Apis mellifera | paired end | 2020 | 2020 | 2020 | USA | North America | 101339070 | 38       | 0     | 16      | 0    |
| PRJNA663557 | SRR12659849 | Apis mellifera | paired end | 2020 | 2020 | 2020 | USA | North America | 141699340 | 36       | 0     | 12      | 0    |
| PRJNA663557 | SRR12659850 | Apis mellifera | paired end | 2020 | 2020 | 2020 | USA | North America | 143203894 | 892      | 0     | 33      | 0    |
| PRJNA663557 | SRR12659851 | Apis mellifera | paired end | 2020 | 2020 | 2020 | USA | North America | 129497282 | 2        | 0     | 0       | 0    |
| PRJNA663557 | SRR12659852 | Apis mellifera | paired end | 2020 | 2020 | 2020 | USA | North America | 123861260 | 6        | 0     | 0       | 0    |
| PRJNA663557 | SRR12659853 | Apis mellifera | paired end | 2020 | 2020 | 2020 | USA | North America | 161299456 | 16       | 0     | 0       | 0    |
| PRJNA663557 | SRR12659854 | Apis mellifera | paired end | 2020 | 2020 | 2020 | USA | North America | 137371570 | 10       | 0     | 2       | 0    |
| PRJNA663557 | SRR12659855 | Apis mellifera | paired end | 2020 | 2020 | 2020 | USA | North America | 143686348 | 40       | 0     | 26      | 0    |
| PRJNA663557 | SRR12659856 | Apis mellifera | paired end | 2020 | 2020 | 2020 | USA | North America | 145397858 | 1489     | 0     | 265     | 0    |
| PRJNA663557 | SRR12659857 | Apis mellifera | paired end | 2020 | 2020 | 2020 | USA | North America | 132669328 | 10       | 0     | 0       | 0    |
| PRJNA663557 | SRR12659858 | Apis mellifera | paired end | 2020 | 2020 | 2020 | USA | North America | 143789630 | 6        | 0     | 0       | 0    |
| PRJNA663557 | SRR12659859 | Apis mellifera | paired end | 2020 | 2020 | 2020 | USA | North America | 140946686 | 94       | 0     | 0       | 0    |
| PRJNA243651 | SRR1269199  | Apis mellifera | paired end | 2014 | NA   | 2012 | USA | North America | 47314632  | 7465     | 0.02  | 924     | 0    |
| PRJNA668910 | SRR12822680 | Apis mellifera | paired end | 2020 | NA   | 2018 | NA  | NA            | 32428634  | 0        | 0     | 0       | 0    |
| PRJNA668910 | SRR12822681 | Apis mellifera | paired end | 2020 | NA   | 2018 | NA  | NA            | 47694494  | 8        | 0     | 0       | 0    |
| PRJNA668910 | SRR12822682 | Apis mellifera | paired end | 2020 | NA   | 2018 | NA  | NA            | 36755418  | 42       | 0     | 0       | 0    |
| PRJNA668910 | SRR12822683 | Apis mellifera | paired end | 2020 | NA   | 2018 | NA  | NA            | 43692420  | 0        | 0     | 0       | 0    |
| PRJNA668910 | SRR12822684 | Apis mellifera | paired end | 2020 | NA   | 2018 | NA  | NA            | 40124630  | 0        | 0     | 0       | 0    |
| PRJNA668910 | SRR12822685 | Apis mellifera | paired end | 2020 | NA   | 2018 | NA  | NA            | 38680758  | 0        | 0     | 0       | 0    |
| PRJNA783076 | SRR12918249 | Apis mellifera | paired end | 2020 | NA   | 2018 | NA  | NA            | 47455326  | 0        | 0     | 0       | 0    |
| PRJNA783076 | SRR12918250 | Apis mellifera | paired end | 2020 | NA   | 2018 | NA  | NA            | 49460832  | 0        | 0     | 0       | 0    |
| PRJNA783076 | SRR12918251 | Apis mellifera | paired end | 2020 | NA   | 2018 | NA  | NA            | 42909530  | 0        | 0     | 0       | 0    |
| PRJNA783076 | SRR12918252 | Apis mellifera | paired end | 2020 | NA   | 2018 | NA  | NA            | 37537460  | 0        | 0     | 0       | 0    |
| PRJNA783076 | SRR12918253 | Apis mellifera | paired end | 2020 | NA   | 2018 | NA  | NA            | 28388802  | 0        | 0     | 0       | 0    |
| PRJNA783076 | SRR12918254 | Apis mellifera | paired end | 2020 | NA   | 2018 | NA  | NA            | 27165236  | 0        | 0     | 0       | 0    |
| PRJNA783076 | SRR12918255 | Apis mellifera | paired end | 2020 | NA   | 2018 | NA  | NA            | 32740430  | 0        | 0     | 0       | 0    |
| PRJNA783076 | SRR12918256 | Apis mellifera | paired end | 2020 | NA   | 2018 | NA  | NA            | 38193764  | 48       | 0     | 0       | 0    |
| PRJNA783076 | SRR12918257 | Apis mellifera | paired end | 2020 | NA   | 2018 | NA  | NA            | 32317364  | 0        | 0     | 0       | 0    |
| PRJNA783076 | SRR12918258 | Apis mellifera | paired end | 2020 | NA   | 2018 | NA  | NA            | 40987628  | 6        | 0     | 0       | 0    |
| PRJNA783076 | SRR12918259 | Apis mellifera | paired end | 2020 | NA   | 2018 | NA  | NA            | 33751558  | 2        | 0     | 0       | 0    |
| PRJNA783076 | SRR12918261 | Apis mellifera | paired end | 2020 | NA   | 2018 | NA  | NA            | 45223350  | 120      | 0     | 2       | 0    |
| PRJNA783076 | SRR12918262 | Apis mellifera | paired end | 2020 | NA   | 2018 | NA  | NA            | 39645952  | 4        | 0     | 0       | 0    |
| PRJNA783076 | SRR12918263 | Apis mellifera | paired end | 2020 | NA   | 2018 | NA  | NA            | 37123970  | 0        | 0     | 0       | 0    |
| PRJNA783076 | SRR12918264 | Apis mellifera | paired end | 2020 | NA   | 2018 | NA  | NA            | 47573294  | 0        | 0     | 0       | 0    |
| PRJNA783076 | SRR12918265 | Apis mellifera | paired end | 2020 | NA   | 2018 | NA  | NA            | 47223204  | 0        | 0     | 0       | 0    |
| PRJNA783076 | SRR12918266 | Apis mellifera | paired end | 2020 | NA   | 2018 | NA  | NA            | 42780882  | 4        | 0     | 0       | 0    |
| PRJNA783076 | SRR12918267 | Apis mellifera | paired end | 2020 | NA   | 2018 | NA  | NA            | 32825650  | 0        | 0     | 0       | 0    |
| PRJNA783076 | SRR12918268 | Apis mellifera | paired end | 2020 | NA   | 2018 | NA  | NA            | 44504424  | 4        | 0     | 0       | 0    |
| PRJNA783076 | SRR12918269 | Apis mellifera | paired end | 2020 | NA   | 2018 | NA  | NA            | 46869270  | 0        | 0     | 0       | 0    |
| PRJNA783076 | SRR12918270 | Apis mellifera | paired end | 2020 | NA   | 2018 | NA  | NA            | 48940684  | 0        | 0     | 0       | 0    |
| PRJNA681941 | SRR13189057 | Apis mellifera | paired end | 2020 | NA   | 2018 | NA  | NA            | 32850332  | 0        | 0     | 0       | 0    |
| PRJNA681941 | SRR13189058 | Apis mellifera | paired end | 2020 | NA   | 2018 | NA  | NA            | 37358100  | 0        | 0     | 0       | 0    |
| PRJNA681941 | SRR13189059 | Apis mellifera | paired end | 2020 | NA   | 2018 | NA  | NA            | 35753438  | 2        | 0     | 0       | 0    |
| PRJNA681941 | SRR13189060 | Apis mellifera | paired end | 2020 | NA   | 2018 | NA  | NA            | 37257226  | 14       | 0     | 0       | 0    |
| PRJNA681941 | SRR13189061 | Apis mellifera | paired end | 2020 | NA   |      |     |               |           |          |       |         |      |

|             |             |                |            |      |      |      |         |               |           |          |       |         |       |
|-------------|-------------|----------------|------------|------|------|------|---------|---------------|-----------|----------|-------|---------|-------|
| PRJNA687318 | SRR13404629 | Apis mellifera | paired end | 2021 | 2018 | 2018 | Israel  | Asia          | 24333066  | 629082   | 2.59  | 698886  | 2.87  |
| PRJNA687318 | SRR13404632 | Apis mellifera | paired end | 2021 | 2018 | 2018 | Israel  | Asia          | 111277030 | 26       | 0     | 43      | 0     |
| PRJNA687318 | SRR13404634 | Apis mellifera | paired end | 2021 | 2018 | 2018 | Israel  | Asia          | 91329024  | 68       | 0     | 63      | 0     |
| PRJNA687318 | SRR13404636 | Apis mellifera | paired end | 2021 | 2018 | 2018 | Israel  | Asia          | 83834060  | 147      | 0     | 149     | 0     |
| PRJNA687318 | SRR13404638 | Apis mellifera | paired end | 2021 | 2018 | 2018 | Israel  | Asia          | 8265130   | 1837186  | 22.23 | 1749056 | 21.16 |
| PRJNA687318 | SRR13404641 | Apis mellifera | paired end | 2021 | 2018 | 2018 | Israel  | Asia          | 81608252  | 2207214  | 2.7   | 2384876 | 2.92  |
| PRJNA691740 | SRR13425963 | Apis mellifera | paired end | 2021 | 2017 | 2017 | China   | Asia          | 56195216  | 2523740  | 4.49  | 4825    | 0.01  |
| PRJNA691740 | SRR13425964 | Apis mellifera | paired end | 2021 | 2017 | 2017 | China   | Asia          | 64229850  | 384408   | 0.6   | 815     | 0     |
| PRJNA691740 | SRR13425965 | Apis mellifera | paired end | 2021 | 2017 | 2017 | China   | Asia          | 52867010  | 2005574  | 3.79  | 3884    | 0.01  |
| PRJNA691740 | SRR13425966 | Apis mellifera | paired end | 2021 | 2017 | 2017 | China   | Asia          | 55450444  | 3941840  | 7.11  | 7639    | 0.01  |
| PRJNA691740 | SRR13425967 | Apis mellifera | paired end | 2021 | 2017 | 2017 | China   | Asia          | 48407264  | 1072426  | 2.22  | 1342    | 0     |
| PRJNA691740 | SRR13425968 | Apis mellifera | paired end | 2021 | 2017 | 2017 | China   | Asia          | 63378254  | 3114688  | 4.91  | 4953    | 0.01  |
| PRJNA694695 | SRR13523810 | Apis mellifera | paired end | 2021 | 2014 | 2014 | USA     | North America | 25535446  | 20050400 | 78.52 | 23139   | 0.09  |
| PRJNA694695 | SRR13523811 | Apis mellifera | paired end | 2021 | 2014 | 2014 | USA     | North America | 27144956  | 14721160 | 54.23 | 35162   | 0.13  |
| PRJNA694695 | SRR13523812 | Apis mellifera | paired end | 2021 | 2014 | 2014 | USA     | North America | 33834082  | 23631400 | 69.84 | 20609   | 0.06  |
| PRJNA694695 | SRR13523813 | Apis mellifera | paired end | 2021 | 2014 | 2014 | USA     | North America | 29821808  | 26221600 | 87.93 | 31879   | 0.11  |
| PRJNA694695 | SRR13523814 | Apis mellifera | paired end | 2021 | 2014 | 2014 | USA     | North America | 26315780  | 8572590  | 32.58 | 7813    | 0.03  |
| PRJNA694695 | SRR13523815 | Apis mellifera | paired end | 2021 | 2014 | 2014 | USA     | North America | 29568938  | 19321406 | 65.34 | 24531   | 0.08  |
| PRJNA235974 | SRR1386316  | Apis mellifera | paired end | 2014 | 2013 | 2013 | Korea   | Asia          | 27286036  | 911012   | 3.34  | 663     | 0     |
| PRJNA707149 | SRR13889652 | Apis mellifera | paired end | 2021 | 2016 | 2016 | Germany | Europe        | 40215294  | 0        | 0     | 0       | 0     |
| PRJNA707149 | SRR13889687 | Apis mellifera | paired end | 2021 | 2016 | 2016 | Germany | Europe        | 41690046  | 0        | 0     | 0       | 0     |
| PRJNA707149 | SRR13889692 | Apis mellifera | paired end | 2021 | 2016 | 2016 | Germany | Europe        | 40743708  | 0        | 0     | 0       | 0     |
| PRJNA707149 | SRR13889693 | Apis mellifera | paired end | 2021 | 2016 | 2016 | Germany | Europe        | 41757890  | 0        | 0     | 0       | 0     |
| PRJNA707149 | SRR13889694 | Apis mellifera | paired end | 2021 | 2016 | 2016 | Germany | Europe        | 41725864  | 0        | 0     | 0       | 0     |
| PRJNA707149 | SRR13889695 | Apis mellifera | paired end | 2021 | 2016 | 2016 | Germany | Europe        | 41680744  | 0        | 0     | 0       | 0     |
| PRJNA707149 | SRR13889696 | Apis mellifera | paired end | 2021 | 2016 | 2016 | Germany | Europe        | 40531432  | 0        | 0     | 10      | 0     |
| PRJNA707149 | SRR13889697 | Apis mellifera | paired end | 2021 | 2016 | 2016 | Germany | Europe        | 40891038  | 0        | 0     | 0       | 0     |
| PRJNA707149 | SRR13889698 | Apis mellifera | paired end | 2021 | 2016 | 2016 | Germany | Europe        | 41171436  | 0        | 0     | 0       | 0     |
| PRJNA707149 | SRR13889699 | Apis mellifera | paired end | 2021 | 2016 | 2016 | Germany | Europe        | 41897754  | 0        | 0     | 12      | 0     |
| PRJNA707149 | SRR13889701 | Apis mellifera | paired end | 2021 | 2016 | 2016 | Germany | Europe        | 41266480  | 0        | 0     | 0       | 0     |
| PRJNA707149 | SRR13889702 | Apis mellifera | paired end | 2021 | 2016 | 2016 | Germany | Europe        | 41197250  | 0        | 0     | 0       | 0     |
| PRJNA707149 | SRR13889703 | Apis mellifera | paired end | 2021 | 2016 | 2016 | Germany | Europe        | 41997632  | 0        | 0     | 0       | 0     |
| PRJNA707149 | SRR13889704 | Apis mellifera | paired end | 2021 | 2016 | 2016 | Germany | Europe        | 41546830  | 0        | 0     | 0       | 0     |
| PRJNA707149 | SRR13889705 | Apis mellifera | paired end | 2021 | 2016 | 2016 | Germany | Europe        | 41838158  | 0        | 0     | 0       | 0     |
| PRJNA707149 | SRR13889706 | Apis mellifera | paired end | 2021 | 2016 | 2016 | Germany | Europe        | 40491840  | 0        | 0     | 0       | 0     |
| PRJNA707149 | SRR13889707 | Apis mellifera | paired end | 2021 | 2016 | 2016 | Germany | Europe        | 40809324  | 0        | 0     | 0       | 0     |
| PRJNA707149 | SRR13889708 | Apis mellifera | paired end | 2021 | 2016 | 2016 | Germany | Europe        | 41922854  | 0        | 0     | 72      | 0     |
| PRJNA707149 | SRR13889709 | Apis mellifera | paired end | 2021 | 2016 | 2016 | Germany | Europe        | 40648112  | 0        | 0     | 0       | 0     |
| PRJNA707149 | SRR13889710 | Apis mellifera | paired end | 2021 | 2016 | 2016 | Germany | Europe        | 41570838  | 0        | 0     | 0       | 0     |
| PRJNA707149 | SRR13889712 | Apis mellifera | paired end | 2021 | 2016 | 2016 | Germany | Europe        | 40703208  | 0        | 0     | 34      | 0     |
| PRJNA707149 | SRR13889713 | Apis mellifera | paired end | 2021 | 2016 | 2016 | Germany | Europe        | 40766764  | 0        | 0     | 0       | 0     |
| PRJNA707149 | SRR13889714 | Apis mellifera | paired end | 2021 | 2016 | 2016 | Germany | Europe        | 40701824  | 0        | 0     | 0       | 0     |
| PRJNA707149 | SRR13889715 | Apis mellifera | paired end | 2021 | 2016 | 2016 | Germany | Europe        | 41150762  | 0        | 0     | 162     | 0     |
| PRJNA707149 | SRR13889716 | Apis mellifera | paired end | 2021 | 2016 | 2016 | Germany | Europe        | 40330752  | 0        | 0     | 0       | 0     |
| PRJNA707149 | SRR13889717 | Apis mellifera | paired end | 2021 | 2016 | 2016 | Germany | Europe        | 41278742  | 0        | 0     | 0       | 0     |
| PRJNA707149 | SRR13889718 | Apis mellifera | paired end | 2021 | 2016 | 2016 | Germany | Europe        | 40690824  | 0        | 0     | 0       | 0     |
| PRJNA707149 | SRR13889719 | Apis mellifera | paired end | 2021 | 2016 | 2016 | Germany | Europe        | 41238640  | 0        | 0     | 0       | 0     |
| PRJNA235974 | SRR1407793  | Apis mellifera | paired end | 2014 | 2013 | 2013 | Korea   | Asia          | 27922064  | 400997   | 1.44  | 5       | 0     |
| PRJNA235974 | SRR1408090  | Apis mellifera | paired end | 2014 | 2013 | 2013 | Korea   | Asia          | 25981706  | 5244076  | 20.18 | 76      | 0     |
| PRJNA260604 | SRR1571716  | Apis mellifera | paired end | 2015 | NA   | 2013 | NA      | NA            | 24706974  | 0        | 0     | 0       | 0     |
| PRJNA260604 | SRR1571717  | Apis mellifera | paired end | 2015 | NA   | 2013 | NA      | NA            | 15594902  | 0        | 0     | 0       | 0     |
| PRJNA260604 | SRR1571719  | Apis mellifera | paired end | 2015 | NA   | 2013 | NA      | NA            | 14881274  | 0        | 0     | 0       | 0     |
| PRJNA260604 | SRR1571720  | Apis mellifera | paired end | 2015 | NA   | 2013 | NA      | NA            | 60163402  | 0        | 0     | 0       | 0     |
| PRJNA260604 | SRR1571721  | Apis mellifera | paired end | 2015 | NA   | 2013 | NA      | NA            | 29314642  | 0        | 0     | 0       | 0     |
| PRJNA260604 | SRR1571722  | Apis mellifera | paired end | 2015 | NA   | 2013 | NA      | NA            | 20329860  | 0        | 0     | 0       | 0     |
| PRJNA260604 | SRR1571723  | Apis mellifera | paired end | 2015 | NA   | 2013 | NA      | NA            | 9024410   | 0        | 0     | 0       | 0     |
| PRJNA260604 | SRR1571724  | Apis mellifera | paired end | 2015 | NA   | 2013 | NA      | NA            | 11233148  | 0        | 0     | 0       | 0     |
| PRJNA260604 | SRR1571725  | Apis mellifera | paired end | 2015 | NA   | 2013 | NA      | NA            | 12917528  | 0        | 0     | 0       | 0     |
| PRJNA260604 | SRR1571726  | Apis mellifera | paired end | 2015 | NA   | 2013 | NA      | NA            | 12370526  | 0        | 0     | 0       | 0     |
| PRJNA260604 | SRR1571727  | Apis mellifera | paired end | 2015 | NA   | 2013 | NA      | NA            | 10541742  | 0        | 0     | 0       | 0     |
| PRJNA260604 | SRR1571728  | Apis mellifera | paired end | 2015 | NA   | 2013 | NA      | NA            | 13588366  | 0        | 0     | 0       | 0     |
| PRJNA260604 | SRR1571729  | Apis mellifera | paired end | 2015 | NA   | 2013 | NA      | NA            | 18439692  | 0        | 0     | 0       | 0     |
| PRJNA260604 | SRR1571730  | Apis mellifera | paired end | 2015 | NA   | 2013 | NA      | NA            | 14297628  | 0        | 0     | 0       | 0     |
| PRJNA260604 | SRR1571731  | Apis mellifera | paired end | 2015 | NA   | 2013 | NA      | NA            | 18391094  | 0        | 0     | 0       | 0     |
| PRJNA274674 | SRR1790682  | Apis mellifera | paired end | 2015 | NA   | 2013 | NA      | NA            | 52410858  | 8        | 0     | 0       | 0     |
| PRJNA274674 | SRR1790683  | Apis mellifera | paired end | 2015 | NA   | 2013 | NA      | NA            | 52253560  | 0        | 0     | 0       | 0     |
| PRJNA274674 | SRR1790684  | Apis mellifera | paired end | 2015 | NA   | 2013 | NA      | NA            | 53182352  | 6        | 0     | 0       | 0     |
| PRJNA274674 | SRR1790685  | Apis mellifera | paired end | 2015 | NA   | 2013 | NA      | NA            | 53051222  | 8        | 0     | 0       | 0     |
| PRJNA274674 | SRR1790686  | Apis mellifera | paired end | 2015 | NA   | 2013 | NA      | NA            | 51231170  | 23123    | 0.05  | 0       | 0     |
| PRJNA274674 | SRR1790687  | Apis mellifera | paired end | 2015 | NA   | 2013 | NA      | NA            | 53823222  | 6        | 0     | 0       | 0     |
| PRJNA277772 | SRR2032812  | Apis mellifera | paired end | 2015 | 2008 | 2008 | NA      | NA            | 43050520  | 6        | 0     | 0       | 0     |
| PRJNA277772 | SRR2032813  | Apis mellifera | paired end | 2015 | 2008 | 2008 | NA      | NA            | 39364294  | 2        | 0     | 0       | 0     |
| PRJNA277772 | SRR2032814  | Apis mellifera | paired end | 2015 | 2008 | 2008 | NA      | NA            | 36395536  | 28       | 0     | 0       | 0     |
| PRJNA277772 | SRR2032816  | Apis mellifera | paired end | 2015 | 2008 | 2008 | NA      | NA            | 43767714  | 3        | 0     | 0       | 0     |
| PRJNA277772 | SRR2032817  | Apis mellifera | paired end | 2015 | 2008 | 2008 | NA      | NA            | 14887322  | 4        | 0     | 0       | 0     |
| PRJNA277772 | SRR2032827  | Apis mellifera | paired end | 2015 | 2008 | 2008 | NA      | NA            | 12690520  | 2        | 0     | 0       | 0     |
| PRJNA277772 | SRR2032844  | Apis mellifera | paired end | 2015 | 2008 | 2008 | NA      | NA            | 44576936  | 2        | 0     | 0       | 0     |
| PRJNA277772 | SRR2032857  | Apis mellifera | paired end | 2015 | 2008 | 2008 | NA      | NA            | 60196844  | 4        | 0     | 0       | 0     |
| PRJNA277772 | SRR2032888  | Apis mellifera | paired end | 2015 | 2008 | 2008 | NA      | NA            | 33495904  | 5        | 0     | 0       | 0     |
| PRJNA277772 | SRR2032907  | Apis mellifera | paired end | 2015 | 2008 | 2008 | NA      | NA            | 71717328  | 22       | 0     | 0       | 0     |
| PRJNA277772 | SRR2032921  | Apis mellifera | paired end | 2015 | 2008 | 2008 | NA      | NA            | 44884920  | 9        | 0     | 0       | 0     |
| PRJNA277772 | SRR2032930  | Apis mellifera | paired end | 2015 | 2008 | 2008 | NA      | NA            | 89512416  | 4        | 0     | 0       | 0     |
| PRJNA277772 | SRR2033014  | Apis mellifera | paired end | 2015 | 2008 | 2008 | NA      | NA            | 19122346  | 0        | 0     | 0       | 0     |
| PRJNA277772 | SRR2033015  | Apis mellifera | paired end | 2015 | 2008 | 2008 | NA      | NA            | 88655922  | 1364     | 0     | 0       | 0     |
| PRJNA284414 | SRR2033979  | Apis mellifera | paired end | 2016 | 2013 | 2013 | USA     | North America | 97152478  | 0        | 0     | 0       | 0     |
| PRJNA284414 | SRR2034245  | Apis mellifera | paired end | 2016 | 2013 | 2013 | USA     | North America | 104232110 | 0        | 0     | 0       | 0     |
| PRJNA284414 | SRR2034249  | Apis mellifera | paired end | 2016 | 2013 | 2013 | USA     | North America | 100647170 | 56       | 0     | 0       | 0     |
| PRJNA284414 | SRR2034253  | Apis mellifera | paired end | 2016 | 2013 | 2013 | USA     | North America | 99690100  | 2        | 0     | 0       | 0     |
| PRJNA284414 | SRR2034262  | Apis mellifera | paired end | 2016 | 2013 | 2013 | USA     | North America | 104330086 | 60475    | 0.06  | 0       | 0     |
| PRJNA284414 | SRR2034266  | Apis mellifera | paired end | 2016 | 2013 | 2013 | USA     | North America | 100236838 | 16       | 0     | 0       | 0     |
| PRJNA284414 | SRR2034269  | Apis mellifera | paired end | 2016 | 2013 | 2013 | USA     | North America | 88941804  | 7841     | 0.01  | 0       | 0     |
| PRJNA284414 | SRR2034271  | Apis mellifera | paired end | 2016 | 2013 | 2013 | USA     | North America | 90724100  | 1403     | 0     | 8       | 0     |
| PRJNA292006 | SRR2146246  | Apis mellifera | paired end | 2015 | NA   | 2013 | China   | Asia          | 33840916  | 4248083  | 12.55 | 247     | 0     |
| PRJNA292006 | SRR2146247  | Apis mellifera | paired end | 2015 | NA   | 2013 | China   | Asia          | 34718208  | 5920445  | 17.05 | 1373    | 0     |
| PRJNA292006 | SRR2146248  | Apis mellifera | paired end | 2015 | NA   | 2013 | China   | Asia          | 36562750  | 5978326  | 16.35 | 2309    | 0.01  |
| PRJNA292006 | SRR2146249  | Apis mellifera | paired end | 2015 | NA   | 2013 | China   | Asia          | 35947082  | 8391767  | 23.34 | 2865    | 0.01  |
| PRJNA292006 | SRR2146250  | Apis mellifera | paired end | 2015 |      |      |         |               |           |          |       |         |       |

|             |            |                |            |      |    |      |       |               |          |          |       |     |   |
|-------------|------------|----------------|------------|------|----|------|-------|---------------|----------|----------|-------|-----|---|
| PRJNA292367 | SRR2153282 | Apis mellifera | paired end | 2015 | NA | 2013 | NA    | NA            | 32595952 | 0        | 0     | 0   | 0 |
| PRJNA292367 | SRR2153283 | Apis mellifera | paired end | 2015 | NA | 2013 | NA    | NA            | 33682510 | 0        | 0     | 0   | 0 |
| PRJNA292367 | SRR2153286 | Apis mellifera | paired end | 2015 | NA | 2013 | NA    | NA            | 32331020 | 0        | 0     | 0   | 0 |
| PRJNA292367 | SRR2153287 | Apis mellifera | paired end | 2015 | NA | 2013 | NA    | NA            | 31253780 | 0        | 0     | 0   | 0 |
| PRJNA306498 | SRR3033249 | Apis mellifera | paired end | 2015 | NA | 2013 | USA   | North America | 34893952 | 882      | 0     | 0   | 0 |
| PRJNA306498 | SRR3033250 | Apis mellifera | paired end | 2015 | NA | 2013 | USA   | North America | 29357976 | 1002     | 0     | 0   | 0 |
| PRJNA306498 | SRR3033251 | Apis mellifera | paired end | 2015 | NA | 2013 | USA   | North America | 43506120 | 2187     | 0.01  | 0   | 0 |
| PRJNA306498 | SRR3033252 | Apis mellifera | paired end | 2015 | NA | 2013 | USA   | North America | 36786804 | 1477     | 0     | 0   | 0 |
| PRJNA306498 | SRR3033253 | Apis mellifera | paired end | 2015 | NA | 2013 | USA   | North America | 44528964 | 1171     | 0     | 0   | 0 |
| PRJNA306498 | SRR3033254 | Apis mellifera | paired end | 2015 | NA | 2013 | USA   | North America | 39600028 | 12133684 | 30.64 | 4   | 0 |
| PRJNA306498 | SRR3033255 | Apis mellifera | paired end | 2015 | NA | 2013 | USA   | North America | 34761798 | 3106     | 0.01  | 0   | 0 |
| PRJNA306498 | SRR3033256 | Apis mellifera | paired end | 2015 | NA | 2013 | USA   | North America | 20513676 | 660      | 0     | 0   | 0 |
| PRJNA306498 | SRR3033257 | Apis mellifera | paired end | 2015 | NA | 2013 | USA   | North America | 40135492 | 1398     | 0     | 0   | 0 |
| PRJNA306498 | SRR3033258 | Apis mellifera | paired end | 2015 | NA | 2013 | USA   | North America | 36052958 | 789      | 0     | 0   | 0 |
| PRJNA306498 | SRR3033259 | Apis mellifera | paired end | 2015 | NA | 2013 | USA   | North America | 44365574 | 6412     | 0.01  | 0   | 0 |
| PRJNA306498 | SRR3033260 | Apis mellifera | paired end | 2015 | NA | 2013 | USA   | North America | 43936368 | 1215     | 0     | 0   | 0 |
| PRJNA306498 | SRR3033261 | Apis mellifera | paired end | 2015 | NA | 2013 | USA   | North America | 28026396 | 720      | 0     | 0   | 0 |
| PRJNA306498 | SRR3033262 | Apis mellifera | paired end | 2015 | NA | 2013 | USA   | North America | 47304832 | 9172     | 0.02  | 0   | 0 |
| PRJNA306498 | SRR3033263 | Apis mellifera | paired end | 2015 | NA | 2013 | USA   | North America | 44920678 | 3518     | 0.01  | 0   | 0 |
| PRJNA306498 | SRR3033264 | Apis mellifera | paired end | 2015 | NA | 2013 | USA   | North America | 35799452 | 1381     | 0     | 0   | 0 |
| PRJNA306498 | SRR3033265 | Apis mellifera | paired end | 2015 | NA | 2013 | USA   | North America | 32720998 | 12380056 | 37.84 | 371 | 0 |
| PRJNA306498 | SRR3033266 | Apis mellifera | paired end | 2015 | NA | 2013 | USA   | North America | 36144262 | 21269792 | 58.85 | 14  | 0 |
| PRJNA306498 | SRR3033267 | Apis mellifera | paired end | 2015 | NA | 2013 | USA   | North America | 39348262 | 17742    | 0.05  | 2   | 0 |
| PRJNA306498 | SRR3033268 | Apis mellifera | paired end | 2015 | NA | 2013 | USA   | North America | 44621244 | 1800     | 0     | 0   | 0 |
| PRJNA306498 | SRR3033269 | Apis mellifera | paired end | 2015 | NA | 2013 | USA   | North America | 43300692 | 2269     | 0.01  | 0   | 0 |
| PRJNA306498 | SRR3033270 | Apis mellifera | paired end | 2015 | NA | 2013 | USA   | North America | 33221370 | 2502     | 0.01  | 0   | 0 |
| PRJNA306498 | SRR3033271 | Apis mellifera | paired end | 2015 | NA | 2013 | USA   | North America | 41063770 | 1205     | 0     | 0   | 0 |
| PRJNA306498 | SRR3033272 | Apis mellifera | paired end | 2015 | NA | 2013 | USA   | North America | 37019256 | 2145     | 0.01  | 0   | 0 |
| PRJNA306498 | SRR3033273 | Apis mellifera | paired end | 2015 | NA | 2013 | USA   | North America | 42191066 | 1630     | 0     | 0   | 0 |
| PRJNA308280 | SRR3095836 | Apis mellifera | paired end | 2016 | NA | 2014 | China | Asia          | 61252688 | 0        | 0     | 0   | 0 |
| PRJNA308280 | SRR3095837 | Apis mellifera | paired end | 2016 | NA | 2014 | China | Asia          | 56542232 | 0        | 0     | 0   | 0 |
| PRJNA308280 | SRR3095838 | Apis mellifera | paired end | 2016 | NA | 2014 | China | Asia          | 71928078 | 0        | 0     | 0   | 0 |
| PRJNA308280 | SRR3095839 | Apis mellifera | paired end | 2016 | NA | 2014 | China | Asia          | 37936248 | 2        | 0     | 0   | 0 |
| PRJNA308280 | SRR3095842 | Apis mellifera | paired end | 2016 | NA | 2014 | China | Asia          | 38630224 | 2        | 0     | 0   | 0 |
| PRJNA308280 | SRR3095843 | Apis mellifera | paired end | 2016 | NA | 2014 | China | Asia          | 38746076 | 2        | 0     | 0   | 0 |
| PRJNA308280 | SRR3095845 | Apis mellifera | paired end | 2016 | NA | 2014 | China | Asia          | 57529296 | 0        | 0     | 0   | 0 |
| PRJNA308280 | SRR3095846 | Apis mellifera | paired end | 2016 | NA | 2014 | China | Asia          | 64377590 | 0        | 0     | 0   | 0 |
| PRJNA308280 | SRR3095847 | Apis mellifera | paired end | 2016 | NA | 2014 | China | Asia          | 66253180 | 0        | 0     | 0   | 0 |
| PRJNA308280 | SRR3095848 | Apis mellifera | paired end | 2016 | NA | 2014 | China | Asia          | 40573288 | 5        | 0     | 0   | 0 |
| PRJNA308280 | SRR3095849 | Apis mellifera | paired end | 2016 | NA | 2014 | China | Asia          | 39374288 | 23       | 0     | 0   | 0 |
| PRJNA308280 | SRR3095850 | Apis mellifera | paired end | 2016 | NA | 2014 | China | Asia          | 40207406 | 4        | 0     | 0   | 0 |
| PRJNA308280 | SRR3095863 | Apis mellifera | paired end | 2016 | NA | 2014 | China | Asia          | 58623948 | 0        | 0     | 0   | 0 |
| PRJNA308280 | SRR3095864 | Apis mellifera | paired end | 2016 | NA | 2014 | China | Asia          | 57986420 | 0        | 0     | 0   | 0 |
| PRJNA308280 | SRR3095865 | Apis mellifera | paired end | 2016 | NA | 2014 | China | Asia          | 62037130 | 0        | 0     | 0   | 0 |
| PRJNA308280 | SRR3095866 | Apis mellifera | paired end | 2016 | NA | 2014 | China | Asia          | 40890226 | 17       | 0     | 0   | 0 |
| PRJNA308280 | SRR3095867 | Apis mellifera | paired end | 2016 | NA | 2014 | China | Asia          | 43069980 | 2        | 0     | 0   | 0 |
| PRJNA308280 | SRR3095868 | Apis mellifera | paired end | 2016 | NA | 2014 | China | Asia          | 42971330 | 1        | 0     | 0   | 0 |
| PRJNA308280 | SRR3095870 | Apis mellifera | paired end | 2016 | NA | 2014 | China | Asia          | 63437492 | 0        | 0     | 0   | 0 |
| PRJNA308280 | SRR3095871 | Apis mellifera | paired end | 2016 | NA | 2014 | China | Asia          | 64041608 | 0        | 0     | 0   | 0 |
| PRJNA308280 | SRR3095872 | Apis mellifera | paired end | 2016 | NA | 2014 | China | Asia          | 69113124 | 0        | 0     | 0   | 0 |
| PRJNA308280 | SRR3095873 | Apis mellifera | paired end | 2016 | NA | 2014 | China | Asia          | 40205518 | 0        | 0     | 0   | 0 |
| PRJNA308280 | SRR3095874 | Apis mellifera | paired end | 2016 | NA | 2014 | China | Asia          | 40658716 | 0        | 0     | 0   | 0 |
| PRJNA308280 | SRR3095876 | Apis mellifera | paired end | 2016 | NA | 2014 | China | Asia          | 40320978 | 0        | 0     | 0   | 0 |
| PRJNA308790 | SRR3102934 | Apis mellifera | paired end | 2016 | NA | 2014 | China | Asia          | 33883960 | 0        | 0     | 0   | 0 |
| PRJNA308790 | SRR3123272 | Apis mellifera | paired end | 2016 | NA | 2014 | China | Asia          | 34022922 | 0        | 0     | 0   | 0 |
| PRJNA308790 | SRR3123273 | Apis mellifera | paired end | 2016 | NA | 2014 | China | Asia          | 32595952 | 0        | 0     | 0   | 0 |
| PRJNA308790 | SRR3123275 | Apis mellifera | paired end | 2016 | NA | 2014 | China | Asia          | 33682510 | 0        | 0     | 0   | 0 |
| PRJNA308790 | SRR3123276 | Apis mellifera | paired end | 2016 | NA | 2014 | China | Asia          | 32331020 | 0        | 0     | 0   | 0 |
| PRJNA308790 | SRR3123277 | Apis mellifera | paired end | 2016 | NA | 2014 | China | Asia          | 31253780 | 0        | 0     | 0   | 0 |
| PRJNA308790 | SRR3123279 | Apis mellifera | paired end | 2016 | NA | 2014 | China | Asia          | 35856924 | 0        | 0     | 0   | 0 |
| PRJNA308790 | SRR3123281 | Apis mellifera | paired end | 2016 | NA | 2014 | China | Asia          | 32760100 | 0        | 0     | 0   | 0 |
| PRJNA308790 | SRR3123337 | Apis mellifera | paired end | 2016 | NA | 2014 | China | Asia          | 39689474 | 0        | 0     | 0   | 0 |
| PRJNA308790 | SRR3123340 | Apis mellifera | paired end | 2016 | NA | 2014 | China | Asia          | 32244884 | 0        | 0     | 0   | 0 |
| PRJNA308790 | SRR3123341 | Apis mellifera | paired end | 2016 | NA | 2014 | China | Asia          | 32970958 | 0        | 0     | 0   | 0 |
| PRJNA308790 | SRR3123342 | Apis mellifera | paired end | 2016 | NA | 2014 | China | Asia          | 36707338 | 0        | 0     | 0   | 0 |
| PRJNA308790 | SRR3123355 | Apis mellifera | paired end | 2016 | NA | 2014 | China | Asia          | 33873020 | 0        | 0     | 0   | 0 |
| PRJNA308790 | SRR3123357 | Apis mellifera | paired end | 2016 | NA | 2014 | China | Asia          | 32369610 | 0        | 0     | 0   | 0 |
| PRJNA308790 | SRR3123359 | Apis mellifera | paired end | 2016 | NA | 2014 | China | Asia          | 27768686 | 0        | 0     | 0   | 0 |
| PRJNA308790 | SRR3123361 | Apis mellifera | paired end | 2016 | NA | 2014 | China | Asia          | 33399192 | 0        | 0     | 0   | 0 |
| PRJNA308790 | SRR3123362 | Apis mellifera | paired end | 2016 | NA | 2014 | China | Asia          | 33433554 | 0        | 0     | 0   | 0 |
| PRJNA308790 | SRR3123364 | Apis mellifera | paired end | 2016 | NA | 2014 | China | Asia          | 36454980 | 1        | 0     | 0   | 0 |
| PRJNA308790 | SRR3123372 | Apis mellifera | paired end | 2016 | NA | 2014 | China | Asia          | 33426734 | 4        | 0     | 0   | 0 |
| PRJNA308790 | SRR3123380 | Apis mellifera | paired end | 2016 | NA | 2014 | China | Asia          | 40275754 | 0        | 0     | 0   | 0 |
| PRJNA308790 | SRR3123385 | Apis mellifera | paired end | 2016 | NA | 2014 | China | Asia          | 32183792 | 0        | 0     | 0   | 0 |
| PRJNA308790 | SRR3123388 | Apis mellifera | paired end | 2016 | NA | 2014 | China | Asia          | 32317174 | 0        | 0     | 0   | 0 |
| PRJNA308790 | SRR3123389 | Apis mellifera | paired end | 2016 | NA | 2014 | China | Asia          | 32989456 | 0        | 0     | 0   | 0 |
| PRJNA308790 | SRR3123390 | Apis mellifera | paired end | 2016 | NA | 2014 | China | Asia          | 35212984 | 0        | 0     | 0   | 0 |
| PRJNA308790 | SRR3123400 | Apis mellifera | paired end | 2016 | NA | 2014 | China | Asia          | 32833290 | 0        | 0     | 0   | 0 |
| PRJNA308790 | SRR3123402 | Apis mellifera | paired end | 2016 | NA | 2014 | China | Asia          | 36296438 | 1        | 0     | 0   | 0 |
| PRJNA308790 | SRR3123404 | Apis mellifera | paired end | 2016 | NA | 2014 | China | Asia          | 34241936 | 0        | 0     | 0   | 0 |
| PRJNA308790 | SRR3123406 | Apis mellifera | paired end | 2016 | NA | 2014 | China | Asia          | 37974664 | 0        | 0     | 0   | 0 |
| PRJNA308790 | SRR3123407 | Apis mellifera | paired end | 2016 | NA | 2014 | China | Asia          | 40124606 | 0        | 0     | 0   | 0 |
| PRJNA308790 | SRR3123408 | Apis mellifera | paired end | 2016 | NA | 2014 | China | Asia          | 33364166 | 0        | 0     | 0   | 0 |
| PRJNA308790 | SRR3123443 | Apis mellifera | paired end | 2016 | NA | 2014 | China | Asia          | 35289980 | 0        | 0     | 0   | 0 |
| PRJNA308790 | SRR3123445 | Apis mellifera | paired end | 2016 | NA | 2014 | China | Asia          | 32344952 | 0        | 0     | 0   | 0 |
| PRJNA308790 | SRR3123446 | Apis mellifera | paired end | 2016 | NA | 2014 | China | Asia          | 27296956 | 0        | 0     | 0   | 0 |
| PRJNA308790 | SRR3123448 | Apis mellifera | paired end | 2016 | NA | 2014 | China | Asia          | 33222808 | 0        | 0     | 0   | 0 |
| PRJNA308790 | SRR3123449 | Apis mellifera | paired end | 2016 | NA | 2014 | China | Asia          | 34466998 | 0        | 0     | 0   | 0 |
| PRJNA308790 | SRR3123451 | Apis mellifera | paired end | 2016 | NA | 2014 | China | Asia          | 36370760 | 0        | 0     | 0   | 0 |
| PRJNA310321 | SRR3144549 | Apis mellifera | paired end | 2017 | NA | 2015 | China | Asia          | 41010136 | 0        | 0     | 0   | 0 |
| PRJNA310321 | SRR3144556 | Apis mellifera | paired end | 2017 | NA | 2015 | China | Asia          | 36899854 | 0        | 0     | 0   | 0 |
| PRJNA310321 | SRR3144557 | Apis mellifera | paired end | 2017 | NA | 2015 | China | Asia          | 30375792 | 0        | 0     | 0   | 0 |
| PRJNA310321 | SRR3144559 | Apis mellifera | paired end | 2017 | NA | 2015 | China | Asia          | 30871944 | 0        | 0     | 0   | 0 |
| PRJNA310321 | SRR3144561 | Apis mellifera | paired end | 2017 | NA | 2015 | China | Asia          | 35434822 | 0        | 0     | 0   | 0 |
| PRJNA310321 | SRR3144562 | Apis mellifera | paired end | 2017 | NA | 2015 | China | Asia          | 34188640 | 0        | 0     | 0   | 0 |
| PRJNA310321 | SRR3144563 | Apis mellifera | paired end | 2017 | NA | 2015 | China | Asia          | 30267660 | 0        | 0     | 0   | 0 |
| PRJNA310321 | SRR3144564 | Apis mellifera | paired end | 2017 | NA | 2015 | China | Asia          | 41010136 | 0        | 0     | 0   | 0 |
| PRJNA310321 | SRR3144566 | Apis mellifera | paired end | 2017 | NA | 2015 | China | Asia          | 33403486 | 0        | 0     | 0   | 0 |
| PRJNA310321 | SRR3144567 | Apis mellifera | paired end | 2017 | NA | 2015 | China | Asia          | 26314554 | 0        | 0     | 0   | 0 |
| PRJNA322424 | SRR3569809 | Apis mellifera | paired end | 2017 | NA | 2015 | NA    | NA            | 53709244 | 19       | 0     | 0   | 0 |
| PRJNA322424 | SRR3569811 | Apis mellifera | paired end | 2017 | NA |      |       |               |          |          |       |     |   |

|             |            |                |            |      |      |      |         |               |           |          |       |          |       |
|-------------|------------|----------------|------------|------|------|------|---------|---------------|-----------|----------|-------|----------|-------|
| PRJNA327226 | SRR3730223 | Apis mellifera | paired end | 2016 | 2014 | 2014 | Czech   | Europe        | 61260     | 0        | 0     | 0        | 0     |
| PRJNA327226 | SRR3730224 | Apis mellifera | paired end | 2016 | 2014 | 2014 | Czech   | Europe        | 59444     | 0        | 0     | 0        | 0     |
| PRJNA327226 | SRR3730225 | Apis mellifera | paired end | 2016 | 2014 | 2014 | Czech   | Europe        | 51014     | 0        | 0     | 0        | 0     |
| PRJNA327226 | SRR3730226 | Apis mellifera | paired end | 2016 | 2014 | 2014 | Czech   | Europe        | 92908     | 0        | 0     | 0        | 0     |
| PRJNA327226 | SRR3730227 | Apis mellifera | paired end | 2016 | 2014 | 2014 | Czech   | Europe        | 104802    | 0        | 0     | 0        | 0     |
| PRJNA327226 | SRR3730228 | Apis mellifera | paired end | 2016 | 2014 | 2014 | Czech   | Europe        | 123252    | 0        | 0     | 0        | 0     |
| PRJNA327226 | SRR3730229 | Apis mellifera | paired end | 2016 | 2014 | 2014 | Czech   | Europe        | 61768     | 0        | 0     | 0        | 0     |
| PRJNA327226 | SRR3730231 | Apis mellifera | paired end | 2016 | 2014 | 2014 | Czech   | Europe        | 26792     | 0        | 0     | 0        | 0     |
| PRJNA327226 | SRR3730232 | Apis mellifera | paired end | 2016 | 2014 | 2014 | Czech   | Europe        | 107480    | 0        | 0     | 0        | 0     |
| PRJNA327226 | SRR3730233 | Apis mellifera | paired end | 2016 | 2014 | 2014 | Czech   | Europe        | 25876     | 0        | 0     | 0        | 0     |
| PRJNA327226 | SRR3730234 | Apis mellifera | paired end | 2016 | 2014 | 2014 | Czech   | Europe        | 104230    | 0        | 0     | 0        | 0     |
| PRJNA327226 | SRR3730235 | Apis mellifera | paired end | 2016 | 2014 | 2014 | Czech   | Europe        | 59334     | 0        | 0     | 0        | 0     |
| PRJNA327226 | SRR3730236 | Apis mellifera | paired end | 2016 | 2014 | 2014 | Czech   | Europe        | 57366     | 0        | 0     | 0        | 0     |
| PRJNA327226 | SRR3730237 | Apis mellifera | paired end | 2016 | 2014 | 2014 | Czech   | Europe        | 83906     | 0        | 0     | 0        | 0     |
| PRJNA327226 | SRR3730238 | Apis mellifera | paired end | 2016 | 2014 | 2014 | Czech   | Europe        | 43332     | 0        | 0     | 0        | 0     |
| PRJNA327226 | SRR3730239 | Apis mellifera | paired end | 2016 | 2014 | 2014 | Czech   | Europe        | 38596     | 0        | 0     | 0        | 0     |
| PRJNA327226 | SRR3730240 | Apis mellifera | paired end | 2016 | 2014 | 2014 | Czech   | Europe        | 70082     | 0        | 0     | 0        | 0     |
| PRJNA327226 | SRR3730241 | Apis mellifera | paired end | 2016 | 2014 | 2014 | Czech   | Europe        | 76556     | 0        | 0     | 0        | 0     |
| PRJNA327226 | SRR3730242 | Apis mellifera | paired end | 2016 | 2014 | 2014 | Czech   | Europe        | 84114     | 0        | 0     | 0        | 0     |
| PRJNA329428 | SRR3927497 | Apis mellifera | paired end | 2016 | 2014 | 2014 | Israel  | Asia          | 62442992  | 4754573  | 7.61  | 12269902 | 19.64 |
| PRJNA329428 | SRR3927501 | Apis mellifera | paired end | 2016 | 2014 | 2014 | Israel  | Asia          | 142947386 | 707138   | 0.49  | 2038118  | 1.43  |
| PRJNA336281 | SRR4002869 | Apis mellifera | paired end | 2016 | NA   | 2014 | Belgium | Europe        | 15976786  | 14989    | 0.09  | 10932322 | 68.43 |
| PRJNA336281 | SRR4002870 | Apis mellifera | paired end | 2016 | NA   | 2014 | Belgium | Europe        | 20368416  | 7095     | 0.03  | 12431382 | 61.04 |
| PRJNA336281 | SRR4002871 | Apis mellifera | paired end | 2016 | NA   | 2014 | Belgium | Europe        | 19894694  | 11886    | 0.06  | 11923090 | 59.93 |
| PRJNA336281 | SRR4002872 | Apis mellifera | paired end | 2016 | NA   | 2014 | Belgium | Europe        | 18386468  | 5640     | 0.03  | 10402447 | 56.58 |
| PRJNA336281 | SRR4002873 | Apis mellifera | paired end | 2016 | NA   | 2014 | Belgium | Europe        | 16070270  | 7138     | 0.04  | 7594099  | 47.04 |
| PRJNA336281 | SRR4002874 | Apis mellifera | paired end | 2016 | NA   | 2014 | Belgium | Europe        | 15662748  | 6913     | 0.04  | 6351604  | 40.55 |
| PRJNA336281 | SRR4002875 | Apis mellifera | paired end | 2016 | NA   | 2014 | Belgium | Europe        | 17414086  | 8837     | 0.05  | 12545002 | 72.04 |
| PRJNA336281 | SRR4002876 | Apis mellifera | paired end | 2016 | NA   | 2014 | Belgium | Europe        | 16863568  | 8881     | 0.05  | 9404899  | 55.77 |
| PRJNA336281 | SRR4002877 | Apis mellifera | paired end | 2016 | NA   | 2014 | Belgium | Europe        | 19222374  | 20373    | 0.11  | 14237820 | 74.07 |
| PRJNA336281 | SRR4002878 | Apis mellifera | paired end | 2016 | NA   | 2014 | Belgium | Europe        | 18016372  | 2865     | 0.02  | 10196717 | 56.6  |
| PRJNA336281 | SRR4002880 | Apis mellifera | paired end | 2016 | NA   | 2014 | Belgium | Europe        | 19493048  | 0        | 0     | 4239     | 0.02  |
| PRJNA336281 | SRR4002881 | Apis mellifera | paired end | 2016 | NA   | 2014 | Belgium | Europe        | 14443630  | 9        | 0     | 4660     | 0.03  |
| PRJNA336281 | SRR4002882 | Apis mellifera | paired end | 2016 | NA   | 2014 | Belgium | Europe        | 17475374  | 0        | 0     | 3744     | 0.02  |
| PRJNA336281 | SRR4002883 | Apis mellifera | paired end | 2016 | NA   | 2014 | Belgium | Europe        | 15897470  | 6        | 0     | 11900    | 0.07  |
| PRJNA336281 | SRR4002884 | Apis mellifera | paired end | 2016 | NA   | 2014 | Belgium | Europe        | 18509746  | 3        | 0     | 5243     | 0.03  |
| PRJNA336281 | SRR4002885 | Apis mellifera | paired end | 2016 | NA   | 2014 | Belgium | Europe        | 16543900  | 7        | 0     | 3387     | 0.02  |
| PRJNA336281 | SRR4002886 | Apis mellifera | paired end | 2016 | NA   | 2014 | Belgium | Europe        | 15963186  | 13       | 0     | 12940    | 0.08  |
| PRJNA336281 | SRR4002888 | Apis mellifera | paired end | 2016 | NA   | 2014 | Belgium | Europe        | 19114308  | 4        | 0     | 3686     | 0.02  |
| PRJNA336281 | SRR4002889 | Apis mellifera | paired end | 2016 | NA   | 2014 | Belgium | Europe        | 17909002  | 4        | 0     | 3338     | 0.02  |
| PRJNA336281 | SRR4002890 | Apis mellifera | paired end | 2016 | NA   | 2014 | Belgium | Europe        | 24121738  | 12041    | 0.05  | 14613880 | 60.58 |
| PRJNA336281 | SRR4002891 | Apis mellifera | paired end | 2016 | NA   | 2014 | Belgium | Europe        | 20293638  | 481      | 0     | 7344221  | 36.19 |
| PRJNA336281 | SRR4002892 | Apis mellifera | paired end | 2016 | NA   | 2014 | Belgium | Europe        | 24827514  | 3492     | 0.01  | 13062544 | 52.61 |
| PRJNA336281 | SRR4002893 | Apis mellifera | paired end | 2016 | NA   | 2014 | Belgium | Europe        | 18220696  | 1012     | 0.01  | 6179510  | 33.91 |
| PRJNA336281 | SRR4002894 | Apis mellifera | paired end | 2016 | NA   | 2014 | Belgium | Europe        | 17798332  | 16305    | 0.09  | 12203111 | 68.56 |
| PRJNA336281 | SRR4002895 | Apis mellifera | paired end | 2016 | NA   | 2014 | Belgium | Europe        | 21076724  | 6377     | 0.03  | 10120263 | 48.02 |
| PRJNA336281 | SRR4002896 | Apis mellifera | paired end | 2016 | NA   | 2014 | Belgium | Europe        | 23226848  | 8175     | 0.04  | 15245191 | 65.64 |
| PRJNA336281 | SRR4002897 | Apis mellifera | paired end | 2016 | NA   | 2014 | Belgium | Europe        | 17463768  | 3787     | 0.02  | 6425807  | 36.8  |
| PRJNA336281 | SRR4002898 | Apis mellifera | paired end | 2016 | NA   | 2014 | Belgium | Europe        | 13734454  | 4641     | 0.03  | 9300770  | 67.72 |
| PRJNA336281 | SRR4002899 | Apis mellifera | paired end | 2016 | NA   | 2014 | Belgium | Europe        | 16917144  | 8806     | 0.05  | 9501469  | 56.16 |
| PRJNA338112 | SRR4013500 | Apis mellifera | paired end | 2017 | NA   | 2015 | NA      | NA            | 28511468  | 71922    | 0.25  | 0        | 0     |
| PRJNA338112 | SRR4013514 | Apis mellifera | paired end | 2017 | NA   | 2015 | NA      | NA            | 25747960  | 2        | 0     | 0        | 0     |
| PRJNA338112 | SRR4013515 | Apis mellifera | paired end | 2017 | NA   | 2015 | NA      | NA            | 24205380  | 0        | 0     | 0        | 0     |
| PRJNA338112 | SRR4013516 | Apis mellifera | paired end | 2017 | NA   | 2015 | NA      | NA            | 26043632  | 239461   | 0.92  | 0        | 0     |
| PRJNA338112 | SRR4013517 | Apis mellifera | paired end | 2017 | NA   | 2015 | NA      | NA            | 31893992  | 11       | 0     | 0        | 0     |
| PRJNA338112 | SRR4013518 | Apis mellifera | paired end | 2017 | NA   | 2015 | NA      | NA            | 30790968  | 0        | 0     | 0        | 0     |
| PRJNA338112 | SRR4013519 | Apis mellifera | paired end | 2017 | NA   | 2015 | NA      | NA            | 24758732  | 207      | 0     | 0        | 0     |
| PRJNA338112 | SRR4013520 | Apis mellifera | paired end | 2017 | NA   | 2015 | NA      | NA            | 29008662  | 2        | 0     | 0        | 0     |
| PRJNA338112 | SRR4013521 | Apis mellifera | paired end | 2017 | NA   | 2015 | NA      | NA            | 34519110  | 0        | 0     | 0        | 0     |
| PRJNA338450 | SRR4017751 | Apis mellifera | paired end | 2016 | NA   | 2014 | USA     | North America | 51181416  | 18507651 | 36.16 | 67       | 0     |
| PRJNA338450 | SRR4017752 | Apis mellifera | paired end | 2016 | NA   | 2014 | USA     | North America | 49408622  | 18274    | 0.04  | 0        | 0     |
| PRJNA338450 | SRR4017753 | Apis mellifera | paired end | 2016 | NA   | 2014 | USA     | North America | 42437846  | 3052706  | 7.19  | 8        | 0     |
| PRJNA338450 | SRR4017754 | Apis mellifera | paired end | 2016 | NA   | 2014 | USA     | North America | 51259100  | 19971471 | 38.96 | 21       | 0     |
| PRJNA338450 | SRR4017755 | Apis mellifera | paired end | 2016 | NA   | 2014 | USA     | North America | 45879604  | 12103491 | 26.38 | 73       | 0     |
| PRJNA338450 | SRR4017756 | Apis mellifera | paired end | 2016 | NA   | 2014 | USA     | North America | 65560506  | 8383395  | 12.79 | 45       | 0     |
| PRJNA338450 | SRR4017757 | Apis mellifera | paired end | 2016 | NA   | 2014 | USA     | North America | 63082340  | 13771839 | 21.83 | 8628     | 0.01  |
| PRJNA338450 | SRR4017758 | Apis mellifera | paired end | 2016 | NA   | 2014 | USA     | North America | 57642432  | 9895855  | 17.17 | 54       | 0     |
| PRJNA338450 | SRR4017759 | Apis mellifera | paired end | 2016 | NA   | 2014 | USA     | North America | 50782012  | 10435922 | 20.55 | 1906     | 0     |
| PRJNA338450 | SRR4017760 | Apis mellifera | paired end | 2016 | NA   | 2014 | USA     | North America | 53442138  | 5776107  | 10.81 | 6        | 0     |
| PRJNA338450 | SRR4017761 | Apis mellifera | paired end | 2016 | NA   | 2014 | USA     | North America | 61025042  | 10152706 | 16.64 | 13       | 0     |
| PRJNA338450 | SRR4017762 | Apis mellifera | paired end | 2016 | NA   | 2014 | USA     | North America | 50485938  | 13313330 | 26.37 | 85       | 0     |
| PRJNA338450 | SRR4017763 | Apis mellifera | paired end | 2016 | NA   | 2014 | USA     | North America | 56988970  | 16297017 | 28.6  | 49       | 0     |
| PRJNA338450 | SRR4017764 | Apis mellifera | paired end | 2016 | NA   | 2014 | USA     | North America | 60904226  | 23685307 | 38.89 | 100      | 0     |
| PRJNA338450 | SRR4017765 | Apis mellifera | paired end | 2016 | NA   | 2014 | USA     | North America | 56708662  | 18468322 | 32.57 | 34       | 0     |
| PRJNA338450 | SRR4017766 | Apis mellifera | paired end | 2016 | NA   | 2014 | USA     | North America | 48755352  | 9957133  | 20.42 | 39       | 0     |
| PRJNA338450 | SRR4017767 | Apis mellifera | paired end | 2016 | NA   | 2014 | USA     | North America | 39293720  | 14550369 | 37.03 | 79       | 0     |
| PRJNA338450 | SRR4017768 | Apis mellifera | paired end | 2016 | NA   | 2014 | USA     | North America | 53299160  | 12294223 | 23.07 | 4        | 0     |
| PRJNA338450 | SRR4017769 | Apis mellifera | paired end | 2016 | NA   | 2014 | USA     | North America | 102196820 | 28760879 | 28.14 | 17883    | 0.02  |
| PRJNA338450 | SRR4017770 | Apis mellifera | paired end | 2016 | NA   | 2014 | USA     | North America | 64178156  | 19785203 | 30.83 | 119      | 0     |
| PRJNA338450 | SRR4017771 | Apis mellifera | paired end | 2016 | NA   | 2014 | USA     | North America | 72556254  | 9495695  | 13.09 | 15       | 0     |
| PRJNA338450 | SRR4017772 | Apis mellifera | paired end | 2016 | NA   | 2014 | USA     | North America | 64819558  | 10248725 | 15.81 | 37       | 0     |
| PRJNA338450 | SRR4017773 | Apis mellifera | paired end | 2016 | NA   | 2014 | USA     | North America | 53843376  | 12714344 | 23.61 | 83       | 0     |
| PRJNA338450 | SRR4017774 | Apis mellifera | paired end | 2016 | NA   | 2014 | USA     | North America | 85459052  | 15438921 | 18.07 | 14       | 0     |
| PRJNA338450 | SRR4017775 | Apis mellifera | paired end | 2016 | NA   | 2014 | USA     | North America | 63433196  | 33728    | 0.05  | 0        | 0     |
| PRJNA338450 | SRR4017776 | Apis mellifera | paired end | 2016 | NA   | 2014 | USA     | North America | 48010558  | 19889    | 0.04  | 0        | 0     |
| PRJNA338450 | SRR4017777 | Apis mellifera | paired end | 2016 | NA   | 2014 | USA     | North America | 40696180  | 8383     | 0.02  | 1        | 0     |
| PRJNA338450 | SRR4017778 | Apis mellifera | paired end | 2016 | NA   | 2014 | USA     | North America | 38067200  | 611      | 0     | 0        | 0     |
| PRJNA338450 | SRR4017779 | Apis mellifera | paired end | 2016 | NA   | 2014 | USA     | North America | 80053346  | 41430    | 0.05  | 5        | 0     |
| PRJNA338450 | SRR4017780 | Apis mellifera | paired end | 2016 | NA   | 2014 | USA     | North America | 71320450  | 33755    | 0.05  | 0        | 0     |
| PRJNA338450 | SRR4017781 | Apis mellifera | paired end | 2016 | NA   | 2014 | USA     | North America | 83495362  | 36851    | 0.04  | 1        | 0     |
| PRJNA338450 | SRR4017782 | Apis mellifera | paired end | 2016 | NA   | 2014 | USA     | North America | 49109706  | 11913    | 0.02  | 0        | 0     |
| PRJNA338450 | SRR4017783 | Apis mellifera | paired end | 2016 | NA   | 2014 | USA     | North America | 30620130  | 38238    | 0.12  | 0        | 0     |
| PRJNA338450 | SRR4017784 | Apis mellifera | paired end | 2016 | NA   | 2014 | USA     | North America | 79211868  | 19045    | 0.02  | 2        | 0     |
| PRJNA338450 | SRR4017785 | Apis mellifera | paired end | 2016 | NA   | 2014 | USA     | North America | 55394036  | 1844190  | 3.33  | 6        | 0     |
| PRJNA338450 | SRR4017786 | Apis mellifera | paired end | 2016 | NA   |      |         |               |           |          |       |          |       |



|             |            |                |            |      |      |      |              |               |           |           |       |          |       |
|-------------|------------|----------------|------------|------|------|------|--------------|---------------|-----------|-----------|-------|----------|-------|
| PRJNA339906 | SRR4084091 | Apis mellifera | paired end | 2017 | 2015 | 2015 | China        | Asia          | 34762568  | 13        | 0     | 0        | 0     |
| PRJNA339906 | SRR4084092 | Apis mellifera | paired end | 2017 | 2015 | 2015 | China        | Asia          | 32497468  | 4         | 0     | 0        | 0     |
| PRJNA339906 | SRR4084093 | Apis mellifera | paired end | 2017 | 2015 | 2015 | China        | Asia          | 29534074  | 8         | 0     | 0        | 0     |
| PRJNA339906 | SRR4084094 | Apis mellifera | paired end | 2017 | 2015 | 2015 | China        | Asia          | 30629132  | 28        | 0     | 0        | 0     |
| PRJNA339906 | SRR4084095 | Apis mellifera | paired end | 2017 | 2015 | 2015 | China        | Asia          | 30237796  | 12        | 0     | 0        | 0     |
| PRJNA339906 | SRR4084096 | Apis mellifera | paired end | 2017 | 2015 | 2015 | China        | Asia          | 28774864  | 35        | 0     | 0        | 0     |
| PRJNA339906 | SRR4084097 | Apis mellifera | paired end | 2017 | 2015 | 2015 | China        | Asia          | 29564924  | 23        | 0     | 0        | 0     |
| PRJNA339906 | SRR4084098 | Apis mellifera | paired end | 2017 | 2015 | 2015 | China        | Asia          | 30217832  | 25        | 0     | 0        | 0     |
| PRJNA339906 | SRR4084099 | Apis mellifera | paired end | 2017 | 2015 | 2015 | China        | Asia          | 47235172  | 16        | 0     | 0        | 0     |
| PRJNA339906 | SRR4084100 | Apis mellifera | paired end | 2017 | 2015 | 2015 | China        | Asia          | 26715638  | 4         | 0     | 0        | 0     |
| PRJNA339906 | SRR4084101 | Apis mellifera | paired end | 2017 | 2015 | 2015 | China        | Asia          | 28544942  | 3         | 0     | 0        | 0     |
| PRJNA339906 | SRR4084102 | Apis mellifera | paired end | 2017 | 2015 | 2015 | China        | Asia          | 32768988  | 12        | 0     | 0        | 0     |
| PRJNA339509 | SRR4096528 | Apis mellifera | paired end | 2016 | NA   | 2014 | NA           | NA            | 590018372 | 0         | 0     | 0        | 0     |
| PRJNA345404 | SRR4343847 | Apis mellifera | paired end | 2017 | NA   | 2015 | NA           | NA            | 11687658  | 0         | 0     | 2        | 0     |
| PRJNA345404 | SRR4343848 | Apis mellifera | paired end | 2017 | NA   | 2015 | NA           | NA            | 11862194  | 0         | 0     | 7325     | 0.06  |
| PRJNA104931 | SRR445999  | Apis mellifera | paired end | 2012 | NA   | 2010 | USA          | North America | 427668328 | 124806752 | 29.18 | 1375     | 0     |
| PRJNA104931 | SRR446000  | Apis mellifera | paired end | 2012 | NA   | 2010 | USA          | North America | 590830686 | 79083063  | 13.39 | 1727     | 0     |
| PRJNA104931 | SRR446001  | Apis mellifera | paired end | 2012 | NA   | 2010 | USA          | North America | 303929248 | 73490388  | 24.18 | 547      | 0     |
| PRJNA104931 | SRR446002  | Apis mellifera | paired end | 2012 | NA   | 2010 | USA          | North America | 308963852 | 82055487  | 26.56 | 740      | 0     |
| PRJNA104931 | SRR446003  | Apis mellifera | paired end | 2012 | NA   | 2010 | USA          | North America | 27277252  | 43762427  | 15.78 | 348      | 0     |
| PRJNA104931 | SRR446004  | Apis mellifera | paired end | 2012 | NA   | 2010 | USA          | North America | 451987942 | 95519037  | 21.13 | 622      | 0     |
| PRJNA104931 | SRR446005  | Apis mellifera | paired end | 2012 | NA   | 2010 | USA          | North America | 357892462 | 104112427 | 29.09 | 1320     | 0     |
| PRJNA104931 | SRR446006  | Apis mellifera | paired end | 2012 | NA   | 2010 | USA          | North America | 386101840 | 58774161  | 15.22 | 786      | 0     |
| PRJNA104931 | SRR446007  | Apis mellifera | paired end | 2012 | NA   | 2010 | USA          | North America | 242309834 | 56448901  | 23.3  | 539      | 0     |
| PRJNA104931 | SRR446008  | Apis mellifera | paired end | 2012 | NA   | 2010 | USA          | North America | 329168752 | 86073701  | 26.15 | 809      | 0     |
| PRJNA104931 | SRR446009  | Apis mellifera | paired end | 2012 | NA   | 2010 | USA          | North America | 359328208 | 78031806  | 21.72 | 456      | 0     |
| PRJNA104931 | SRR446010  | Apis mellifera | paired end | 2012 | NA   | 2010 | USA          | North America | 278812238 | 73890307  | 26.5  | 566      | 0     |
| PRJNA478161 | SRR498622  | Apis mellifera | paired end | 2012 | NA   | 2010 | USA          | North America | 38230006  | 31798     | 0.08  | 1        | 0     |
| PRJNA478161 | SRR498988  | Apis mellifera | paired end | 2012 | NA   | 2010 | USA          | North America | 40959240  | 107390    | 0.26  | 5        | 0     |
| PRJNA478161 | SRR498982  | Apis mellifera | paired end | 2012 | NA   | 2010 | USA          | North America | 32336648  | 17936     | 0.06  | 1        | 0     |
| PRJNA478161 | SRR498983  | Apis mellifera | paired end | 2012 | NA   | 2010 | USA          | North America | 37025856  | 131895    | 0.36  | 3        | 0     |
| PRJNA478161 | SRR499919  | Apis mellifera | paired end | 2012 | NA   | 2010 | USA          | North America | 36316808  | 44064     | 0.12  | 3        | 0     |
| PRJNA478161 | SRR499920  | Apis mellifera | paired end | 2012 | NA   | 2010 | USA          | North America | 37847774  | 279155    | 0.74  | 2        | 0     |
| PRJNA478161 | SRR499992  | Apis mellifera | paired end | 2012 | NA   | 2010 | USA          | North America | 38449538  | 64077     | 0.17  | 0        | 0     |
| PRJNA478161 | SRR499993  | Apis mellifera | paired end | 2012 | NA   | 2010 | USA          | North America | 36704784  | 46502     | 0.13  | 0        | 0     |
| PRJNA478161 | SRR499994  | Apis mellifera | paired end | 2012 | NA   | 2010 | USA          | North America | 47488940  | 31340277  | 65.99 | 106      | 0     |
| PRJNA478161 | SRR499995  | Apis mellifera | paired end | 2012 | NA   | 2010 | USA          | North America | 34686976  | 28845     | 0.08  | 2        | 0     |
| PRJNA357165 | SRR5109820 | Apis mellifera | paired end | 2017 | 2013 | 2013 | South_Africa | Africa        | 40214438  | 212       | 0     | 1095     | 0     |
| PRJNA357165 | SRR5109821 | Apis mellifera | paired end | 2017 | 2015 | 2015 | Tonga        | Oceania       | 42618838  | 3507      | 0.01  | 17593    | 0.04  |
| PRJNA357165 | SRR5109822 | Apis mellifera | paired end | 2017 | 2015 | 2015 | Tonga        | Oceania       | 37316706  | 1663396   | 4.46  | 8069220  | 21.62 |
| PRJNA357165 | SRR5109823 | Apis mellifera | paired end | 2017 | 2014 | 2014 | Netherlands  | Europe        | 86837530  | 1828689   | 2.11  | 61646744 | 70.99 |
| PRJNA357165 | SRR5109826 | Apis mellifera | paired end | 2017 | 2013 | 2013 | South_Africa | Africa        | 84044582  | 4447      | 0.01  | 6683     | 0.01  |
| PRJNA357165 | SRR5109828 | Apis mellifera | paired end | 2017 | 2015 | 2015 | Tonga        | Oceania       | 42283492  | 491       | 0     | 2328     | 0.01  |
| PRJNA357165 | SRR5109829 | Apis mellifera | paired end | 2017 | 2014 | 2014 | Netherlands  | Europe        | 90787598  | 211133    | 0.23  | 43761301 | 48.2  |
| PRJNA357165 | SRR5109831 | Apis mellifera | paired end | 2017 | 2013 | 2013 | South_Africa | Africa        | 37640156  | 1423      | 0     | 24       | 0     |
| PRJNA357165 | SRR5109832 | Apis mellifera | paired end | 2017 | 2013 | 2013 | South_Africa | Africa        | 89462246  | 6885      | 0.01  | 8344     | 0.01  |
| PRJNA357165 | SRR5109833 | Apis mellifera | paired end | 2017 | 2013 | 2013 | South_Africa | Africa        | 41030460  | 335       | 0     | 1744     | 0     |
| PRJNA357165 | SRR5109834 | Apis mellifera | paired end | 2017 | 2015 | 2015 | Tonga        | Oceania       | 38406846  | 327       | 0     | 1636     | 0     |
| PRJNA357705 | SRR5116303 | Apis mellifera | paired end | 2016 | 2012 | 2012 | USA          | North America | 27672054  | 10134104  | 36.62 | 89       | 0     |
| PRJNA357705 | SRR5116304 | Apis mellifera | paired end | 2016 | 2012 | 2012 | USA          | North America | 23939232  | 12896284  | 53.87 | 18152    | 0.08  |
| PRJNA357705 | SRR5116305 | Apis mellifera | paired end | 2016 | 2012 | 2012 | USA          | North America | 49788778  | 1772431   | 3.56  | 36812169 | 73.94 |
| PRJNA357705 | SRR5116306 | Apis mellifera | paired end | 2016 | 2012 | 2012 | USA          | North America | 49265160  | 36601550  | 74.29 | 669      | 0     |
| PRJNA357705 | SRR5116307 | Apis mellifera | paired end | 2016 | 2012 | 2012 | USA          | North America | 28415146  | 23658438  | 83.26 | 14821    | 0.05  |
| PRJNA357705 | SRR5116308 | Apis mellifera | paired end | 2016 | 2012 | 2012 | USA          | North America | 47278224  | 29764101  | 62.96 | 38030    | 0.08  |
| PRJNA357523 | SRR5117442 | Apis mellifera | paired end | 2017 | 2014 | 2014 | Australia    | Oceania       | 61193250  | 0         | 0     | 0        | 0     |
| PRJNA357523 | SRR5117443 | Apis mellifera | paired end | 2017 | 2014 | 2014 | Australia    | Oceania       | 94212890  | 0         | 0     | 0        | 0     |
| PRJNA357523 | SRR5117444 | Apis mellifera | paired end | 2017 | 2013 | 2013 | Australia    | Oceania       | 118366806 | 0         | 0     | 0        | 0     |
| PRJNA357523 | SRR5117445 | Apis mellifera | paired end | 2017 | 2013 | 2013 | Australia    | Oceania       | 114948672 | 0         | 0     | 0        | 0     |
| PRJNA357523 | SRR5117446 | Apis mellifera | paired end | 2017 | 2014 | 2014 | Australia    | Oceania       | 60012246  | 0         | 0     | 0        | 0     |
| PRJNA357523 | SRR5117447 | Apis mellifera | paired end | 2017 | 2014 | 2014 | Australia    | Oceania       | 105713768 | 0         | 0     | 0        | 0     |
| PRJNA357523 | SRR5117448 | Apis mellifera | paired end | 2017 | 2014 | 2014 | Australia    | Oceania       | 78728734  | 0         | 0     | 0        | 0     |
| PRJNA357523 | SRR5117449 | Apis mellifera | paired end | 2017 | 2014 | 2014 | Australia    | Oceania       | 96652584  | 0         | 0     | 0        | 0     |
| PRJNA357523 | SRR5117450 | Apis mellifera | paired end | 2017 | 2014 | 2014 | Australia    | Oceania       | 74494242  | 0         | 0     | 0        | 0     |
| PRJNA359486 | SRR5136448 | Apis mellifera | paired end | 2017 | NA   | 2015 | China        | Asia          | 99634250  | 498       | 0     | 0        | 0     |
| PRJNA359486 | SRR5136449 | Apis mellifera | paired end | 2017 | NA   | 2015 | China        | Asia          | 101848792 | 636       | 0     | 0        | 0     |
| PRJNA359486 | SRR5136450 | Apis mellifera | paired end | 2017 | NA   | 2015 | China        | Asia          | 104160918 | 501       | 0     | 0        | 0     |
| PRJNA359486 | SRR5136451 | Apis mellifera | paired end | 2017 | NA   | 2015 | China        | Asia          | 98132370  | 860950    | 0.88  | 0        | 0     |
| PRJNA359486 | SRR5136452 | Apis mellifera | paired end | 2017 | NA   | 2015 | China        | Asia          | 128177728 | 2045      | 0     | 0        | 0     |
| PRJNA359486 | SRR5136453 | Apis mellifera | paired end | 2017 | NA   | 2015 | China        | Asia          | 100160218 | 1045873   | 1.04  | 7        | 0     |
| PRJNA359486 | SRR5136454 | Apis mellifera | paired end | 2017 | NA   | 2015 | China        | Asia          | 95494324  | 936192    | 0.98  | 0        | 0     |
| PRJNA359486 | SRR5136455 | Apis mellifera | paired end | 2017 | NA   | 2015 | China        | Asia          | 83810010  | 19908     | 0.02  | 0        | 0     |
| PRJNA359486 | SRR5136456 | Apis mellifera | paired end | 2017 | NA   | 2015 | China        | Asia          | 90240988  | 58        | 0     | 0        | 0     |
| PRJNA359486 | SRR5136457 | Apis mellifera | paired end | 2017 | NA   | 2015 | China        | Asia          | 105607542 | 4832344   | 4.58  | 0        | 0     |
| PRJNA359486 | SRR5136458 | Apis mellifera | paired end | 2017 | NA   | 2015 | China        | Asia          | 87929650  | 39243     | 0.04  | 0        | 0     |
| PRJNA359486 | SRR5136459 | Apis mellifera | paired end | 2017 | NA   | 2015 | China        | Asia          | 148447384 | 32808630  | 22.1  | 82       | 0     |
| PRJNA369540 | SRR5223579 | Apis mellifera | paired end | 2019 | NA   | 2017 | NA           | NA            | 167821922 | 14982803  | 8.93  | 1377     | 0     |
| PRJNA369540 | SRR5223580 | Apis mellifera | paired end | 2019 | NA   | 2017 | NA           | NA            | 158879070 | 45155     | 0.03  | 99       | 0     |
| PRJNA369540 | SRR5223581 | Apis mellifera | paired end | 2019 | NA   | 2017 | NA           | NA            | 159186198 | 14629606  | 9.19  | 291      | 0     |
| PRJNA369540 | SRR5223582 | Apis mellifera | paired end | 2019 | NA   | 2017 | NA           | NA            | 168392988 | 8643      | 0.01  | 6        | 0     |
| PRJNA380305 | SRR5383925 | Apis mellifera | paired end | 2018 | NA   | 2016 | NA           | NA            | 24077114  | 3911756   | 16.25 | 80       | 0     |
| PRJNA380316 | SRR5383927 | Apis mellifera | paired end | 2017 | NA   | 2015 | China        | Asia          | 34732180  | 6157107   | 17.73 | 66       | 0     |
| PRJNA380316 | SRR5383937 | Apis mellifera | paired end | 2017 | NA   | 2015 | China        | Asia          | 32930712  | 4733122   | 14.37 | 7        | 0     |
| PRJNA380316 | SRR5383939 | Apis mellifera | paired end | 2017 | NA   | 2015 | China        | Asia          | 27041110  | 2081072   | 7.7   | 38       | 0     |
| PRJNA380305 | SRR5383942 | Apis mellifera | paired end | 2018 | NA   | 2016 | NA           | NA            | 34732180  | 6157104   | 17.73 | 66       | 0     |
| PRJNA380316 | SRR5387735 | Apis mellifera | paired end | 2017 | NA   | 2015 | China        | Asia          | 31507082  | 3551044   | 11.27 | 10       | 0     |
| PRJNA380316 | SRR5387737 | Apis mellifera | paired end | 2017 | NA   | 2015 | China        | Asia          | 24077114  | 3911753   | 16.25 | 80       | 0     |
| PRJNA380316 | SRR5387738 | Apis mellifera | paired end | 2017 | NA   | 2015 | China        | Asia          | 26538502  | 5533193   | 20.85 | 105      | 0     |
| PRJNA383947 | SRR5478349 | Apis mellifera | paired end | 2017 | NA   | 2015 | NA           | NA            | 31589514  | 50        | 0     | 0        | 0     |
| PRJNA383947 | SRR5478350 | Apis mellifera | paired end | 2017 | NA   | 2015 | NA           | NA            | 27106792  | 13        | 0     | 0        | 0     |
| PRJNA386067 | SRR5534311 | Apis mellifera | paired end | 2017 | 2014 | 2014 | Korea        | Asia          | 66531568  | 0         | 0     | 0        | 0     |
| PRJNA386067 | SRR5534312 | Apis mellifera | paired end | 2017 | 2014 | 2014 | Korea        | Asia          | 78712308  | 0         | 0     | 0        | 0     |
| PRJNA386067 | SRR5534313 | Apis mellifera | paired end | 2017 | 2014 | 2014 | Korea        | Asia          | 69209606  | 0         | 0     | 0        | 0     |
| PRJNA386067 | SRR5534314 | Apis mellifera | paired end | 2017 | 2014 | 2014 | Korea        | Asia          | 84122858  | 0         | 0     | 0        | 0     |
| PRJNA386859 | SRR5615334 | Apis mellifera | paired end | 2017 | 2016 | 2016 | USA          | North America | 85983194  | 1365      | 0     | 3        | 0     |
| PRJNA386859 | SRR5615335 | Apis mellifera | paired end | 2017 | 2016 | 2016 | USA          | North America |           |           |       |          |       |

|             |             |                |            |      |      |      |       |               |           |          |       |       |      |
|-------------|-------------|----------------|------------|------|------|------|-------|---------------|-----------|----------|-------|-------|------|
| PRJNA175445 | SRR584147   | Apis mellifera | paired end | 2013 | 2011 | 2011 | USA   | North America | 32012050  | 5336050  | 16.67 | 8742  | 0.03 |
| PRJNA175445 | SRR584156   | Apis mellifera | paired end | 2013 | 2011 | 2011 | USA   | North America | 16131564  | 2278967  | 14.13 | 3235  | 0.02 |
| PRJNA175445 | SRR584160   | Apis mellifera | paired end | 2013 | 2011 | 2011 | USA   | North America | 16972664  | 3858278  | 22.73 | 7407  | 0.04 |
| PRJNA175445 | SRR584163   | Apis mellifera | paired end | 2013 | 2011 | 2011 | USA   | North America | 24240944  | 4363381  | 18    | 6987  | 0.03 |
| PRJNA175445 | SRR584169   | Apis mellifera | paired end | 2013 | 2011 | 2011 | USA   | North America | 22318092  | 1447659  | 6.49  | 2785  | 0.01 |
| PRJNA175445 | SRR584172   | Apis mellifera | paired end | 2013 | 2011 | 2011 | USA   | North America | 21556600  | 4442527  | 20.61 | 14330 | 0.07 |
| PRJNA175445 | SRR584177   | Apis mellifera | paired end | 2013 | 2011 | 2011 | USA   | North America | 19401608  | 3303238  | 17.03 | 4725  | 0.02 |
| PRJNA175445 | SRR584184   | Apis mellifera | paired end | 2013 | 2011 | 2011 | USA   | North America | 51410174  | 3150595  | 6.13  | 7542  | 0.01 |
| PRJNA175445 | SRR584187   | Apis mellifera | paired end | 2013 | 2011 | 2011 | USA   | North America | 30871554  | 2877227  | 9.32  | 6252  | 0.02 |
| PRJNA175445 | SRR584189   | Apis mellifera | paired end | 2013 | 2011 | 2011 | USA   | North America | 21147498  | 2729020  | 12.9  | 7519  | 0.04 |
| PRJNA175445 | SRR584192   | Apis mellifera | paired end | 2013 | 2011 | 2011 | USA   | North America | 17205992  | 3368992  | 19.58 | 8250  | 0.05 |
| PRJNA175445 | SRR585833   | Apis mellifera | paired end | 2013 | 2011 | 2011 | USA   | North America | 17642008  | 2778380  | 15.75 | 7088  | 0.04 |
| PRJNA406998 | SRR6031640  | Apis mellifera | paired end | 2018 | 2017 | 2017 | China | Asia          | 208589632 | 131      | 0     | 0     | 0    |
| PRJNA406998 | SRR6031641  | Apis mellifera | paired end | 2018 | 2017 | 2017 | China | Asia          | 173097006 | 191      | 0     | 0     | 0    |
| PRJNA406998 | SRR6031642  | Apis mellifera | paired end | 2018 | 2017 | 2017 | China | Asia          | 160844082 | 170      | 0     | 0     | 0    |
| PRJNA406998 | SRR6031643  | Apis mellifera | paired end | 2018 | 2017 | 2017 | China | Asia          | 129878194 | 16       | 0     | 0     | 0    |
| PRJNA406998 | SRR6031644  | Apis mellifera | paired end | 2018 | 2017 | 2017 | China | Asia          | 113683898 | 2        | 0     | 0     | 0    |
| PRJNA406998 | SRR6031645  | Apis mellifera | paired end | 2018 | 2017 | 2017 | China | Asia          | 160537248 | 1        | 0     | 0     | 0    |
| PRJNA406998 | SRR6031646  | Apis mellifera | paired end | 2018 | 2017 | 2017 | China | Asia          | 149230808 | 9        | 0     | 0     | 0    |
| PRJNA406998 | SRR6031647  | Apis mellifera | paired end | 2018 | 2017 | 2017 | China | Asia          | 131386354 | 12       | 0     | 0     | 0    |
| PRJNA406998 | SRR6031648  | Apis mellifera | paired end | 2018 | 2017 | 2017 | China | Asia          | 152323278 | 1322     | 0     | 0     | 0    |
| PRJNA406998 | SRR6031649  | Apis mellifera | paired end | 2018 | 2017 | 2017 | China | Asia          | 200417896 | 1177     | 0     | 0     | 0    |
| PRJNA406998 | SRR6031650  | Apis mellifera | paired end | 2018 | 2017 | 2017 | China | Asia          | 126667596 | 943      | 0     | 0     | 0    |
| PRJNA406998 | SRR6031651  | Apis mellifera | paired end | 2018 | 2017 | 2017 | China | Asia          | 249473666 | 208      | 0     | 0     | 0    |
| PRJNA407316 | SRR6047306  | Apis mellifera | paired end | 2018 | NA   | 2016 | China | Asia          | 56359504  | 72       | 0     | 0     | 0    |
| PRJNA407316 | SRR6047307  | Apis mellifera | paired end | 2018 | NA   | 2016 | China | Asia          | 79136518  | 39       | 0     | 0     | 0    |
| PRJNA407316 | SRR6047308  | Apis mellifera | paired end | 2018 | NA   | 2016 | China | Asia          | 55776806  | 54       | 0     | 0     | 0    |
| PRJNA407316 | SRR6047309  | Apis mellifera | paired end | 2018 | NA   | 2016 | China | Asia          | 60368568  | 155478   | 0.26  | 0     | 0    |
| PRJNA407316 | SRR6047310  | Apis mellifera | paired end | 2018 | NA   | 2016 | China | Asia          | 75071086  | 247      | 0     | 0     | 0    |
| PRJNA407316 | SRR6047311  | Apis mellifera | paired end | 2018 | NA   | 2016 | China | Asia          | 58556824  | 246397   | 0.42  | 1     | 0    |
| PRJNA407316 | SRR6047312  | Apis mellifera | paired end | 2018 | NA   | 2016 | China | Asia          | 59872588  | 103800   | 0.17  | 0     | 0    |
| PRJNA407316 | SRR6047313  | Apis mellifera | paired end | 2018 | NA   | 2016 | China | Asia          | 62554784  | 47       | 0     | 0     | 0    |
| PRJNA407316 | SRR6047314  | Apis mellifera | paired end | 2018 | NA   | 2016 | China | Asia          | 56668426  | 29       | 0     | 0     | 0    |
| PRJNA407316 | SRR6047315  | Apis mellifera | paired end | 2018 | NA   | 2016 | China | Asia          | 59045000  | 916953   | 1.55  | 0     | 0    |
| PRJNA407316 | SRR6047316  | Apis mellifera | paired end | 2018 | NA   | 2016 | China | Asia          | 60314752  | 1277     | 0     | 0     | 0    |
| PRJNA407316 | SRR6047317  | Apis mellifera | paired end | 2018 | NA   | 2016 | China | Asia          | 59057944  | 3696913  | 6.26  | 16    | 0    |
| PRJNA418780 | SRR6326775  | Apis mellifera | paired end | 2018 | 2015 | 2015 | USA   | North America | 26930730  | 101      | 0     | 0     | 0    |
| PRJNA418780 | SRR6326776  | Apis mellifera | paired end | 2018 | 2015 | 2015 | USA   | North America | 24962760  | 103034   | 0.41  | 1     | 0    |
| PRJNA418780 | SRR6326777  | Apis mellifera | paired end | 2018 | 2015 | 2015 | USA   | North America | 26033666  | 98       | 0     | 0     | 0    |
| PRJNA418780 | SRR6326778  | Apis mellifera | paired end | 2018 | 2015 | 2015 | USA   | North America | 26502548  | 322122   | 1.22  | 1     | 0    |
| PRJNA418780 | SRR6326779  | Apis mellifera | paired end | 2018 | 2015 | 2015 | USA   | North America | 23805036  | 75       | 0     | 0     | 0    |
| PRJNA418780 | SRR6326780  | Apis mellifera | paired end | 2018 | 2015 | 2015 | USA   | North America | 27730112  | 81       | 0     | 0     | 0    |
| PRJNA429508 | SRR6489887  | Apis mellifera | paired end | 2019 | 2015 | 2015 | USA   | North America | 43163710  | 20764290 | 48.11 | 17    | 0    |
| PRJNA429508 | SRR6489888  | Apis mellifera | paired end | 2019 | 2015 | 2015 | USA   | North America | 58285804  | 5774     | 0.01  | 0     | 0    |
| PRJNA429508 | SRR6489889  | Apis mellifera | paired end | 2019 | 2015 | 2015 | USA   | North America | 44723652  | 28064782 | 62.75 | 10    | 0    |
| PRJNA429508 | SRR6489891  | Apis mellifera | paired end | 2019 | 2015 | 2015 | USA   | North America | 40996312  | 30484    | 0.07  | 0     | 0    |
| PRJNA429508 | SRR6489892  | Apis mellifera | paired end | 2019 | 2015 | 2015 | USA   | North America | 39278566  | 28327860 | 72.12 | 28    | 0    |
| PRJNA429508 | SRR6489893  | Apis mellifera | paired end | 2019 | 2015 | 2015 | USA   | North America | 43233678  | 22747    | 0.05  | 0     | 0    |
| PRJNA429508 | SRR6489894  | Apis mellifera | paired end | 2019 | 2015 | 2015 | USA   | North America | 50299286  | 4932     | 0.01  | 0     | 0    |
| PRJNA429508 | SRR6489895  | Apis mellifera | paired end | 2019 | 2015 | 2015 | USA   | North America | 44472368  | 1255     | 0     | 0     | 0    |
| PRJNA429508 | SRR6489896  | Apis mellifera | paired end | 2019 | 2015 | 2015 | USA   | North America | 40160214  | 16423764 | 40.9  | 3     | 0    |
| PRJNA429508 | SRR6489897  | Apis mellifera | paired end | 2019 | 2015 | 2015 | USA   | North America | 43965288  | 269301   | 0.61  | 3     | 0    |
| PRJNA429508 | SRR6489915  | Apis mellifera | paired end | 2019 | 2015 | 2015 | USA   | North America | 42313086  | 26828405 | 63.4  | 16    | 0    |
| PRJNA429508 | SRR6489916  | Apis mellifera | paired end | 2019 | 2015 | 2015 | USA   | North America | 40298130  | 2755     | 0.01  | 0     | 0    |
| PRJNA429508 | SRR6489917  | Apis mellifera | paired end | 2019 | 2015 | 2015 | USA   | North America | 45326130  | 956      | 0     | 0     | 0    |
| PRJNA429508 | SRR6489918  | Apis mellifera | paired end | 2019 | 2015 | 2015 | USA   | North America | 42325700  | 1135     | 0     | 0     | 0    |
| PRJNA429508 | SRR6489919  | Apis mellifera | paired end | 2019 | 2015 | 2015 | USA   | North America | 42521258  | 3318     | 0.01  | 0     | 0    |
| PRJNA429508 | SRR6489920  | Apis mellifera | paired end | 2019 | 2015 | 2015 | USA   | North America | 42938196  | 7111     | 0.02  | 0     | 0    |
| PRJNA429508 | SRR6489921  | Apis mellifera | paired end | 2019 | 2015 | 2015 | USA   | North America | 38790148  | 17503    | 0.05  | 0     | 0    |
| PRJNA429508 | SRR6489922  | Apis mellifera | paired end | 2019 | 2015 | 2015 | USA   | North America | 36641658  | 1020     | 0     | 0     | 0    |
| PRJNA434146 | SRR6727829  | Apis mellifera | paired end | 2018 | NA   | 2016 | NA    | NA            | 14345520  | 0        | 0     | 0     | 0    |
| PRJNA434146 | SRR6727830  | Apis mellifera | paired end | 2018 | NA   | 2016 | NA    | NA            | 14110580  | 0        | 0     | 0     | 0    |
| PRJNA434146 | SRR6727831  | Apis mellifera | paired end | 2018 | NA   | 2016 | NA    | NA            | 14500834  | 0        | 0     | 0     | 0    |
| PRJNA434146 | SRR6727832  | Apis mellifera | paired end | 2018 | NA   | 2016 | NA    | NA            | 14297964  | 0        | 0     | 0     | 0    |
| PRJNA434146 | SRR6727833  | Apis mellifera | paired end | 2018 | NA   | 2016 | NA    | NA            | 14494274  | 0        | 0     | 0     | 0    |
| PRJNA434146 | SRR6727834  | Apis mellifera | paired end | 2018 | NA   | 2016 | NA    | NA            | 14344702  | 0        | 0     | 0     | 0    |
| PRJNA434146 | SRR6727835  | Apis mellifera | paired end | 2018 | NA   | 2016 | NA    | NA            | 14634746  | 0        | 0     | 0     | 0    |
| PRJNA434146 | SRR6727836  | Apis mellifera | paired end | 2018 | NA   | 2016 | NA    | NA            | 14501614  | 0        | 0     | 0     | 0    |
| PRJNA434146 | SRR6727837  | Apis mellifera | paired end | 2018 | NA   | 2016 | NA    | NA            | 13451964  | 0        | 0     | 0     | 0    |
| PRJNA434146 | SRR6727838  | Apis mellifera | paired end | 2018 | NA   | 2016 | NA    | NA            | 13268808  | 0        | 0     | 0     | 0    |
| PRJNA434146 | SRR6727839  | Apis mellifera | paired end | 2018 | NA   | 2016 | NA    | NA            | 13605474  | 0        | 0     | 0     | 0    |
| PRJNA434146 | SRR6727840  | Apis mellifera | paired end | 2018 | NA   | 2016 | NA    | NA            | 13418334  | 0        | 0     | 0     | 0    |
| PRJNA434146 | SRR6727841  | Apis mellifera | paired end | 2018 | NA   | 2016 | NA    | NA            | 14056768  | 0        | 0     | 0     | 0    |
| PRJNA434146 | SRR6727842  | Apis mellifera | paired end | 2018 | NA   | 2016 | NA    | NA            | 13865456  | 0        | 0     | 0     | 0    |
| PRJNA434146 | SRR6727843  | Apis mellifera | paired end | 2018 | NA   | 2016 | NA    | NA            | 14224416  | 0        | 0     | 0     | 0    |
| PRJNA434146 | SRR6727844  | Apis mellifera | paired end | 2018 | NA   | 2016 | NA    | NA            | 14043804  | 0        | 0     | 0     | 0    |
| PRJNA434146 | SRR6727845  | Apis mellifera | paired end | 2018 | NA   | 2016 | NA    | NA            | 12212406  | 0        | 0     | 0     | 0    |
| PRJNA434146 | SRR6727846  | Apis mellifera | paired end | 2018 | NA   | 2016 | NA    | NA            | 12059184  | 0        | 0     | 0     | 0    |
| PRJNA434146 | SRR6727847  | Apis mellifera | paired end | 2018 | NA   | 2016 | NA    | NA            | 12333314  | 0        | 0     | 0     | 0    |
| PRJNA434146 | SRR6727848  | Apis mellifera | paired end | 2018 | NA   | 2016 | NA    | NA            | 12195416  | 0        | 0     | 0     | 0    |
| PRJNA434146 | SRR6727849  | Apis mellifera | paired end | 2018 | NA   | 2016 | NA    | NA            | 12952440  | 0        | 0     | 0     | 0    |
| PRJNA434146 | SRR6727850  | Apis mellifera | paired end | 2018 | NA   | 2016 | NA    | NA            | 12715912  | 0        | 0     | 0     | 0    |
| PRJNA434146 | SRR6727851  | Apis mellifera | paired end | 2018 | NA   | 2016 | NA    | NA            | 12999334  | 0        | 0     | 0     | 0    |
| PRJNA434146 | SRR6727852  | Apis mellifera | paired end | 2018 | NA   | 2016 | NA    | NA            | 12849116  | 0        | 0     | 0     | 0    |
| PRJNA434146 | SRR6727853  | Apis mellifera | paired end | 2018 | NA   | 2016 | NA    | NA            | 14062306  | 0        | 0     | 0     | 0    |
| PRJNA434146 | SRR6727854  | Apis mellifera | paired end | 2018 | NA   | 2016 | NA    | NA            | 13828908  | 0        | 0     | 0     | 0    |
| PRJNA434146 | SRR6727855  | Apis mellifera | paired end | 2018 | NA   | 2016 | NA    | NA            | 14210140  | 0        | 0     | 0     | 0    |
| PRJNA434146 | SRR6727856  | Apis mellifera | paired end | 2018 | NA   | 2016 | NA    | NA            | 13999284  | 0        | 0     | 0     | 0    |
| PRJNA434146 | SRR6727857  | Apis mellifera | paired end | 2018 | NA   | 2016 | NA    | NA            | 13677078  | 0        | 0     | 0     | 0    |
| PRJNA434146 | SRR6727858  | Apis mellifera | paired end | 2018 | NA   | 2016 | NA    | NA            | 13447088  | 0        | 0     | 0     | 0    |
| PRJNA641576 | SRR12080862 | Apis mellifera | paired end | 2020 | 2019 | 2019 | China | Asia          | 42404432  | 26       | 0     | 0     | 0    |
| PRJNA641576 | SRR12080863 | Apis mellifera | paired end | 2020 | 2019 | 2019 | China | Asia          | 41368044  | 37770    | 0.09  | 0     | 0    |
| PRJNA641576 | SRR12080864 | Apis mellifera | paired end | 2020 | 2019 | 2019 | China | Asia          | 44996028  | 976      | 0     | 0     | 0    |
| PRJNA641576 | SRR12080865 | Apis mellifera | paired end | 2020 | 2019 | 2019 | China | Asia          | 47061750  | 3        | 0     | 0     | 0    |
| PRJNA641576 | SRR12080866 | Apis mellifera | paired end | 2020 | 2019 | 2019 | China | Asia          | 46558518  | 0        | 0     | 0     | 0    |
| PRJNA641576 | SRR12080867 | Apis mellifera | paired end | 2020 | 2019 | 2019 | China | Asia          | 41695556  | 6        | 0     | 0     | 0    |
| PRJNA641576 | SRR12080868 | Apis mellifera | paired end | 2020 | 2019 | 2019 | China |               |           |          |       |       |      |

|             |            |                |            |      |      |      |              |               |           |          |       |          |       |
|-------------|------------|----------------|------------|------|------|------|--------------|---------------|-----------|----------|-------|----------|-------|
| PRJNA436408 | SRR6793742 | Apis mellifera | paired end | 2020 | NA   | 2018 | China        | Asia          | 58869218  | 3955790  | 6.72  | 1        | 0     |
| PRJNA437728 | SRR6823683 | Apis mellifera | paired end | 2018 | 2004 | 2004 | Syria/Jordan | Asia          | 69703502  | 24096054 | 34.57 | 7429642  | 10.66 |
| PRJNA437730 | SRR6823685 | Apis mellifera | paired end | 2018 | 2014 | 2014 | Algeria      | Africa        | 44877638  | 13126495 | 29.25 | 23941    | 0.05  |
| PRJNA438231 | SRR6833955 | Apis mellifera | paired end | 2018 | 2015 | 2015 | NA           | NA            | 58364376  | 153980   | 0.26  | 4458380  | 7.64  |
| PRJNA438231 | SRR6833956 | Apis mellifera | paired end | 2018 | 2015 | 2015 | South_Africa | Africa        | 67105306  | 168      | 0     | 25624    | 0.04  |
| PRJNA438231 | SRR6833957 | Apis mellifera | paired end | 2018 | 2015 | 2015 | South_Africa | Africa        | 55592538  | 1025     | 0     | 111724   | 0.12  |
| PRJNA438231 | SRR6833958 | Apis mellifera | paired end | 2018 | 2015 | 2015 | South_Africa | Africa        | 65872128  | 262      | 0     | 7372     | 0.01  |
| PRJNA438231 | SRR6833959 | Apis mellifera | paired end | 2018 | 2015 | 2015 | South_Africa | Africa        | 54684282  | 680      | 0     | 51823    | 0.09  |
| PRJNA438231 | SRR6833960 | Apis mellifera | paired end | 2018 | 2015 | 2015 | South_Africa | Africa        | 67004760  | 592090   | 0.88  | 15998936 | 23.88 |
| PRJNA438231 | SRR6833961 | Apis mellifera | paired end | 2018 | 2015 | 2015 | South_Africa | Africa        | 65956034  | 925      | 0     | 7925744  | 12.02 |
| PRJNA438231 | SRR6833962 | Apis mellifera | paired end | 2018 | 2015 | 2015 | South_Africa | Africa        | 73950658  | 373892   | 0.51  | 10997739 | 14.87 |
| PRJNA438231 | SRR6833963 | Apis mellifera | paired end | 2018 | 2015 | 2015 | South_Africa | Africa        | 60409760  | 612      | 0     | 63047    | 0.1   |
| PRJNA438231 | SRR6833964 | Apis mellifera | paired end | 2018 | 2015 | 2015 | South_Africa | Africa        | 76350296  | 178      | 0     | 4741     | 0.01  |
| PRJNA438231 | SRR6833965 | Apis mellifera | paired end | 2018 | 2015 | 2015 | South_Africa | Africa        | 70905126  | 134      | 0     | 3799     | 0.01  |
| PRJNA438231 | SRR6833966 | Apis mellifera | paired end | 2018 | 2015 | 2015 | South_Africa | Africa        | 64880868  | 562      | 0     | 55251    | 0.09  |
| PRJNA442330 | SRR6880250 | Apis mellifera | paired end | 2019 | 2015 | 2015 | USA          | North America | 20268910  | 13853881 | 68.35 | 3402     | 0.02  |
| PRJNA442330 | SRR6880251 | Apis mellifera | paired end | 2019 | 2015 | 2015 | USA          | North America | 23520970  | 17388748 | 73.93 | 2181665  | 9.28  |
| PRJNA442330 | SRR6880252 | Apis mellifera | paired end | 2019 | 2015 | 2015 | USA          | North America | 29621190  | 58224    | 0.2   | 594      | 0     |
| PRJNA442330 | SRR6880253 | Apis mellifera | paired end | 2019 | 2015 | 2015 | USA          | North America | 19788698  | 14014104 | 70.82 | 2933     | 0.01  |
| PRJNA442330 | SRR6880254 | Apis mellifera | paired end | 2019 | 2015 | 2015 | USA          | North America | 24220668  | 16794176 | 69.34 | 4540     | 0.02  |
| PRJNA442330 | SRR6880255 | Apis mellifera | paired end | 2019 | 2015 | 2015 | USA          | North America | 22098768  | 15889663 | 71.9  | 4095     | 0.02  |
| PRJNA442330 | SRR6880256 | Apis mellifera | paired end | 2019 | 2015 | 2015 | USA          | North America | 27954156  | 20633718 | 73.81 | 8335     | 0.03  |
| PRJNA442330 | SRR6880257 | Apis mellifera | paired end | 2019 | 2015 | 2015 | USA          | North America | 16817192  | 8385374  | 49.86 | 1605     | 0.01  |
| PRJNA442330 | SRR6880258 | Apis mellifera | paired end | 2019 | 2015 | 2015 | USA          | North America | 33340186  | 29020311 | 87.04 | 22069    | 0.07  |
| PRJNA442330 | SRR6880259 | Apis mellifera | paired end | 2019 | 2015 | 2015 | USA          | North America | 28515310  | 24762776 | 86.84 | 13666    | 0.05  |
| PRJNA442330 | SRR6880260 | Apis mellifera | paired end | 2019 | 2015 | 2015 | USA          | North America | 31132666  | 18653295 | 59.92 | 6541042  | 21.01 |
| PRJNA442330 | SRR6880261 | Apis mellifera | paired end | 2019 | 2015 | 2015 | USA          | North America | 29510186  | 12520078 | 42.43 | 4545     | 0.02  |
| PRJNA442330 | SRR6880262 | Apis mellifera | paired end | 2019 | 2015 | 2015 | USA          | North America | 3917742   | 66918    | 1.71  | 1289     | 0.03  |
| PRJNA442330 | SRR6880263 | Apis mellifera | paired end | 2019 | 2015 | 2015 | USA          | North America | 21678462  | 16020004 | 73.9  | 3649     | 0.02  |
| PRJNA442330 | SRR6880264 | Apis mellifera | paired end | 2019 | 2015 | 2015 | USA          | North America | 19538436  | 15847798 | 81.11 | 3781     | 0.02  |
| PRJNA442330 | SRR6880265 | Apis mellifera | paired end | 2019 | 2015 | 2015 | USA          | North America | 25895368  | 18897515 | 72.98 | 3809     | 0.01  |
| PRJNA442330 | SRR6880266 | Apis mellifera | paired end | 2019 | 2015 | 2015 | USA          | North America | 25419724  | 17699500 | 69.63 | 7322     | 0.03  |
| PRJNA442330 | SRR6880267 | Apis mellifera | paired end | 2019 | 2015 | 2015 | USA          | North America | 25090682  | 19271451 | 76.81 | 22079    | 0.09  |
| PRJNA442330 | SRR6880268 | Apis mellifera | paired end | 2019 | 2015 | 2015 | USA          | North America | 21582152  | 15692490 | 72.71 | 4107     | 0.02  |
| PRJNA442330 | SRR6880269 | Apis mellifera | paired end | 2019 | 2015 | 2015 | USA          | North America | 27536872  | 9990313  | 36.28 | 2407     | 0.01  |
| PRJNA442330 | SRR6880270 | Apis mellifera | paired end | 2019 | 2015 | 2015 | USA          | North America | 23441522  | 15394227 | 65.67 | 3405426  | 14.53 |
| PRJNA442330 | SRR6880271 | Apis mellifera | paired end | 2019 | 2015 | 2015 | USA          | North America | 24613614  | 18331118 | 74.48 | 1294868  | 5.26  |
| PRJNA442330 | SRR6880272 | Apis mellifera | paired end | 2019 | 2015 | 2015 | USA          | North America | 25752396  | 15878519 | 61.66 | 4008     | 0.02  |
| PRJNA442330 | SRR6880273 | Apis mellifera | paired end | 2019 | 2015 | 2015 | USA          | North America | 26685764  | 19558876 | 73.29 | 1012     | 0     |
| PRJNA442330 | SRR6880274 | Apis mellifera | paired end | 2019 | 2015 | 2015 | USA          | North America | 25508960  | 21864221 | 85.71 | 10584    | 0.04  |
| PRJNA442330 | SRR6880275 | Apis mellifera | paired end | 2019 | 2015 | 2015 | USA          | North America | 18177778  | 15336585 | 84.37 | 11024    | 0.06  |
| PRJNA442330 | SRR6880276 | Apis mellifera | paired end | 2019 | 2015 | 2015 | USA          | North America | 22824984  | 13677844 | 59.92 | 3856     | 0.02  |
| PRJNA442330 | SRR6880277 | Apis mellifera | paired end | 2019 | 2015 | 2015 | USA          | North America | 23104294  | 4475999  | 19.37 | 1200     | 0.01  |
| PRJNA442330 | SRR6880278 | Apis mellifera | paired end | 2019 | 2015 | 2015 | USA          | North America | 27661150  | 85815    | 0.31  | 105      | 0     |
| PRJNA442330 | SRR6880279 | Apis mellifera | paired end | 2019 | 2015 | 2015 | USA          | North America | 24972816  | 301235   | 1.21  | 376      | 0     |
| PRJNA442330 | SRR6880280 | Apis mellifera | paired end | 2019 | 2015 | 2015 | USA          | North America | 19000250  | 12290184 | 64.68 | 5492     | 0.03  |
| PRJNA442330 | SRR6880281 | Apis mellifera | paired end | 2019 | 2015 | 2015 | USA          | North America | 19178428  | 6363479  | 33.18 | 2196     | 0.01  |
| PRJNA442330 | SRR6880282 | Apis mellifera | paired end | 2019 | 2015 | 2015 | USA          | North America | 18404646  | 8442088  | 45.87 | 21370    | 0.12  |
| PRJNA442330 | SRR6880283 | Apis mellifera | paired end | 2019 | 2015 | 2015 | USA          | North America | 19602438  | 12776097 | 65.18 | 14892    | 0.08  |
| PRJNA442330 | SRR6880284 | Apis mellifera | paired end | 2019 | 2015 | 2015 | USA          | North America | 22396172  | 17265128 | 77.09 | 5961     | 0.03  |
| PRJNA442330 | SRR6880285 | Apis mellifera | paired end | 2019 | 2015 | 2015 | USA          | North America | 21717778  | 15535581 | 71.53 | 762324   | 3.51  |
| PRJNA442330 | SRR6880286 | Apis mellifera | paired end | 2019 | 2015 | 2015 | USA          | North America | 23308460  | 8486     | 0.04  | 27       | 0     |
| PRJNA442330 | SRR6880287 | Apis mellifera | paired end | 2019 | 2015 | 2015 | USA          | North America | 20273876  | 10800279 | 53.27 | 13961    | 0.07  |
| PRJNA442330 | SRR6880288 | Apis mellifera | paired end | 2019 | 2015 | 2015 | USA          | North America | 26010980  | 67852    | 0.26  | 145      | 0     |
| PRJNA442330 | SRR6880289 | Apis mellifera | paired end | 2019 | 2015 | 2015 | USA          | North America | 23184972  | 20152    | 0.09  | 53       | 0     |
| PRJNA442330 | SRR6880290 | Apis mellifera | paired end | 2019 | 2015 | 2015 | USA          | North America | 26993328  | 11486803 | 42.55 | 15613    | 0.06  |
| PRJNA442330 | SRR6880291 | Apis mellifera | paired end | 2019 | 2015 | 2015 | USA          | North America | 25506054  | 14430    | 0.06  | 39       | 0     |
| PRJNA442330 | SRR6880292 | Apis mellifera | paired end | 2019 | 2015 | 2015 | USA          | North America | 19176090  | 15767854 | 82.23 | 8459     | 0.04  |
| PRJNA442330 | SRR6880293 | Apis mellifera | paired end | 2019 | 2015 | 2015 | USA          | North America | 23697780  | 19819420 | 83.63 | 10714    | 0.05  |
| PRJNA442330 | SRR6880294 | Apis mellifera | paired end | 2019 | 2015 | 2015 | USA          | North America | 27025460  | 18392587 | 68.06 | 14932    | 0.06  |
| PRJNA442330 | SRR6880295 | Apis mellifera | paired end | 2019 | 2015 | 2015 | USA          | North America | 26070984  | 9975535  | 38.26 | 25910    | 0.1   |
| PRJNA442330 | SRR6880296 | Apis mellifera | paired end | 2019 | 2015 | 2015 | USA          | North America | 20604302  | 16264508 | 78.94 | 10924    | 0.05  |
| PRJNA442330 | SRR6880297 | Apis mellifera | paired end | 2019 | 2015 | 2015 | USA          | North America | 26682450  | 18717230 | 70.15 | 4139     | 0.02  |
| PRJNA478908 | SRR7460780 | Apis mellifera | paired end | 2019 | NA   | 2017 | NA           | NA            | 60532264  | 0        | 0     | 0        | 0     |
| PRJNA478908 | SRR7460781 | Apis mellifera | paired end | 2019 | NA   | 2017 | NA           | NA            | 56132332  | 2        | 0     | 0        | 0     |
| PRJNA478908 | SRR7460782 | Apis mellifera | paired end | 2019 | NA   | 2017 | NA           | NA            | 53748498  | 0        | 0     | 0        | 0     |
| PRJNA478908 | SRR7460783 | Apis mellifera | paired end | 2019 | NA   | 2017 | NA           | NA            | 57487168  | 1        | 0     | 0        | 0     |
| PRJNA478908 | SRR7460784 | Apis mellifera | paired end | 2019 | NA   | 2017 | NA           | NA            | 54216268  | 0        | 0     | 0        | 0     |
| PRJNA478908 | SRR7460785 | Apis mellifera | paired end | 2019 | NA   | 2017 | NA           | NA            | 54001658  | 0        | 0     | 0        | 0     |
| PRJNA478908 | SRR7460786 | Apis mellifera | paired end | 2019 | NA   | 2017 | NA           | NA            | 54615604  | 1        | 0     | 0        | 0     |
| PRJNA478908 | SRR7460787 | Apis mellifera | paired end | 2019 | NA   | 2017 | NA           | NA            | 47131026  | 0        | 0     | 0        | 0     |
| PRJNA478908 | SRR7460788 | Apis mellifera | paired end | 2019 | NA   | 2017 | NA           | NA            | 56494396  | 0        | 0     | 0        | 0     |
| PRJNA478908 | SRR7460789 | Apis mellifera | paired end | 2019 | NA   | 2017 | NA           | NA            | 49210692  | 0        | 0     | 0        | 0     |
| PRJNA478908 | SRR7460790 | Apis mellifera | paired end | 2019 | NA   | 2017 | NA           | NA            | 55782734  | 0        | 0     | 0        | 0     |
| PRJNA478908 | SRR7460791 | Apis mellifera | paired end | 2019 | NA   | 2017 | NA           | NA            | 56071232  | 0        | 0     | 0        | 0     |
| PRJNA478908 | SRR7460792 | Apis mellifera | paired end | 2019 | NA   | 2017 | NA           | NA            | 56564188  | 0        | 0     | 0        | 0     |
| PRJNA478908 | SRR7460793 | Apis mellifera | paired end | 2019 | NA   | 2017 | NA           | NA            | 52276120  | 0        | 0     | 0        | 0     |
| PRJNA478908 | SRR7460794 | Apis mellifera | paired end | 2019 | NA   | 2017 | NA           | NA            | 48975296  | 0        | 0     | 0        | 0     |
| PRJNA478908 | SRR7460795 | Apis mellifera | paired end | 2019 | NA   | 2017 | NA           | NA            | 52667940  | 1        | 0     | 0        | 0     |
| PRJNA478908 | SRR7460796 | Apis mellifera | paired end | 2019 | NA   | 2017 | NA           | NA            | 54600532  | 0        | 0     | 0        | 0     |
| PRJNA478908 | SRR7460797 | Apis mellifera | paired end | 2019 | NA   | 2017 | NA           | NA            | 52751508  | 0        | 0     | 0        | 0     |
| PRJNA478908 | SRR7460798 | Apis mellifera | paired end | 2019 | NA   | 2017 | NA           | NA            | 47431192  | 0        | 0     | 0        | 0     |
| PRJNA478908 | SRR7460799 | Apis mellifera | paired end | 2019 | NA   | 2017 | NA           | NA            | 56993022  | 4        | 0     | 0        | 0     |
| PRJNA478908 | SRR7460800 | Apis mellifera | paired end | 2019 | NA   | 2017 | NA           | NA            | 67819870  | 0        | 0     | 0        | 0     |
| PRJNA478908 | SRR7460801 | Apis mellifera | paired end | 2019 | NA   | 2017 | NA           | NA            | 56873292  | 0        | 0     | 0        | 0     |
| PRJNA478908 | SRR7460802 | Apis mellifera | paired end | 2019 | NA   | 2017 | NA           | NA            | 57667608  | 0        | 0     | 0        | 0     |
| PRJNA478908 | SRR7460803 | Apis mellifera | paired end | 2019 | NA   | 2017 | NA           | NA            | 57099948  | 0        | 0     | 0        | 0     |
| PRJNA480381 | SRR7513056 | Apis mellifera | paired end | 2019 | NA   | 2017 | China        | Asia          | 100829996 | 24802863 | 24.6  | 51       | 0     |
| PRJNA480381 | SRR7513057 | Apis mellifera | paired end | 2019 | NA   | 2017 | China        | Asia          | 59983080  | 1481152  | 2.47  | 1        | 0     |
| PRJNA480381 | SRR7513058 | Apis mellifera | paired end | 2019 | NA   | 2017 | China        | Asia          | 50196234  | 998392   | 1.99  | 2        | 0     |
| PRJNA480381 | SRR7513059 | Apis mellifera | paired end | 2019 | NA   | 2017 | China        | Asia          | 51967326  | 620      | 0     | 0        | 0     |
| PRJNA480381 | SRR7513060 | Apis mellifera | paired end | 2019 | NA   |      |              |               |           |          |       |          |       |

|             |            |                |            |      |      |      |        |               |           |          |       |      |   |
|-------------|------------|----------------|------------|------|------|------|--------|---------------|-----------|----------|-------|------|---|
| PRJNA488619 | SRR7770435 | Apis mellifera | paired end | 2019 | NA   | 2017 | China  | Asia          | 112861484 | 3132032  | 2.78  | 113  | 0 |
| PRJNA488619 | SRR7770436 | Apis mellifera | paired end | 2019 | NA   | 2017 | China  | Asia          | 100326436 | 147913   | 0.15  | 0    | 0 |
| PRJNA490324 | SRR7829127 | Apis mellifera | paired end | 2019 | 2014 | 2014 | Brazil | South America | 69766364  | 0        | 0     | 0    | 0 |
| PRJNA490324 | SRR7829129 | Apis mellifera | paired end | 2019 | 2014 | 2014 | Brazil | South America | 77068018  | 0        | 0     | 0    | 0 |
| PRJNA490324 | SRR7829130 | Apis mellifera | paired end | 2019 | 2014 | 2014 | Brazil | South America | 97479876  | 0        | 0     | 0    | 0 |
| PRJNA490324 | SRR7829131 | Apis mellifera | paired end | 2019 | 2014 | 2014 | Brazil | South America | 100562906 | 0        | 0     | 0    | 0 |
| PRJNA490324 | SRR7829132 | Apis mellifera | paired end | 2019 | 2014 | 2014 | Brazil | South America | 58393140  | 0        | 0     | 0    | 0 |
| PRJNA490324 | SRR7829133 | Apis mellifera | paired end | 2019 | 2014 | 2014 | Brazil | South America | 78422602  | 0        | 0     | 0    | 0 |
| PRJNA490324 | SRR7829134 | Apis mellifera | paired end | 2019 | 2014 | 2014 | Brazil | South America | 82227144  | 0        | 0     | 0    | 0 |
| PRJNA490324 | SRR7829135 | Apis mellifera | paired end | 2019 | 2014 | 2014 | Brazil | South America | 48047516  | 0        | 0     | 0    | 0 |
| PRJNA490324 | SRR7829136 | Apis mellifera | paired end | 2019 | 2014 | 2014 | Brazil | South America | 80922592  | 0        | 0     | 0    | 0 |
| PRJNA194157 | SRR801788  | Apis mellifera | paired end | 2013 | NA   | 2011 | NA     | NA            | 28646970  | 1903     | 0.01  | 111  | 0 |
| PRJNA194157 | SRR801844  | Apis mellifera | paired end | 2013 | NA   | 2011 | NA     | NA            | 27984962  | 62       | 0     | 18   | 0 |
| PRJNA194157 | SRR802386  | Apis mellifera | paired end | 2013 | NA   | 2011 | NA     | NA            | 33738484  | 182      | 0     | 59   | 0 |
| PRJNA194157 | SRR802538  | Apis mellifera | paired end | 2013 | NA   | 2011 | NA     | NA            | 36193280  | 191      | 0     | 0    | 0 |
| PRJNA194157 | SRR802556  | Apis mellifera | paired end | 2013 | NA   | 2011 | NA     | NA            | 35517036  | 1        | 0     | 0    | 0 |
| PRJNA194157 | SRR802899  | Apis mellifera | paired end | 2013 | NA   | 2011 | NA     | NA            | 24636090  | 76       | 0     | 20   | 0 |
| PRJNA194157 | SRR806508  | Apis mellifera | paired end | 2013 | NA   | 2011 | NA     | NA            | 92004718  | 279      | 0     | 72   | 0 |
| PRJNA194157 | SRR806550  | Apis mellifera | paired end | 2013 | NA   | 2011 | NA     | NA            | 124193172 | 148      | 0     | 28   | 0 |
| PRJNA194157 | SRR806693  | Apis mellifera | paired end | 2013 | NA   | 2011 | NA     | NA            | 85795228  | 396      | 0     | 2    | 0 |
| PRJNA194157 | SRR806701  | Apis mellifera | paired end | 2013 | NA   | 2011 | NA     | NA            | 64517386  | 528      | 0     | 51   | 0 |
| PRJNA194157 | SRR806709  | Apis mellifera | paired end | 2013 | NA   | 2011 | NA     | NA            | 90233990  | 19       | 0     | 2    | 0 |
| PRJNA194157 | SRR806711  | Apis mellifera | paired end | 2013 | NA   | 2011 | NA     | NA            | 90233990  | 19       | 0     | 2    | 0 |
| PRJNA510543 | SRR8335255 | Apis mellifera | paired end | 2018 | 2017 | 2017 | China  | Asia          | 57832244  | 225      | 0     | 0    | 0 |
| PRJNA510543 | SRR8335256 | Apis mellifera | paired end | 2018 | 2017 | 2017 | China  | Asia          | 55803140  | 1951244  | 3.5   | 0    | 0 |
| PRJNA510543 | SRR8335257 | Apis mellifera | paired end | 2018 | 2017 | 2017 | China  | Asia          | 54772400  | 3794     | 0.01  | 0    | 0 |
| PRJNA510543 | SRR8335258 | Apis mellifera | paired end | 2018 | 2017 | 2017 | China  | Asia          | 61526972  | 55       | 0     | 0    | 0 |
| PRJNA510495 | SRR8335305 | Apis mellifera | paired end | 2018 | 2017 | 2017 | China  | Asia          | 28076708  | 9481     | 0.03  | 0    | 0 |
| PRJNA510495 | SRR8335306 | Apis mellifera | paired end | 2018 | 2017 | 2017 | China  | Asia          | 27293038  | 3704     | 0.01  | 0    | 0 |
| PRJNA510495 | SRR8335307 | Apis mellifera | paired end | 2018 | 2017 | 2017 | China  | Asia          | 44005106  | 2973518  | 6.76  | 1479 | 0 |
| PRJNA510495 | SRR8335308 | Apis mellifera | paired end | 2018 | 2017 | 2017 | China  | Asia          | 43702512  | 4130377  | 9.45  | 1997 | 0 |
| PRJNA510495 | SRR8335309 | Apis mellifera | paired end | 2018 | 2017 | 2017 | China  | Asia          | 27873590  | 963614   | 3.46  | 13   | 0 |
| PRJNA510495 | SRR8335310 | Apis mellifera | paired end | 2018 | 2017 | 2017 | China  | Asia          | 27735218  | 838      | 0     | 0    | 0 |
| PRJNA510495 | SRR8335311 | Apis mellifera | paired end | 2018 | 2017 | 2017 | China  | Asia          | 27866854  | 1733     | 0.01  | 0    | 0 |
| PRJNA510495 | SRR8335312 | Apis mellifera | paired end | 2018 | 2017 | 2017 | China  | Asia          | 27316582  | 94412    | 0.35  | 0    | 0 |
| PRJNA201395 | SRR849282  | Apis mellifera | paired end | 2013 | 2011 | 2011 | China  | Asia          | 48971186  | 0        | 0     | 0    | 0 |
| PRJNA201395 | SRR849283  | Apis mellifera | paired end | 2013 | 2011 | 2011 | China  | Asia          | 49358642  | 0        | 0     | 0    | 0 |
| PRJNA521949 | SRR8567892 | Apis mellifera | paired end | 2019 | 2018 | 2018 | Taiwan | Asia          | 10634944  | 624      | 0.01  | 0    | 0 |
| PRJNA521949 | SRR8567893 | Apis mellifera | paired end | 2019 | 2018 | 2018 | Taiwan | Asia          | 12245720  | 832      | 0.01  | 0    | 0 |
| PRJNA521949 | SRR8567894 | Apis mellifera | paired end | 2019 | 2018 | 2018 | Taiwan | Asia          | 14652912  | 684      | 0     | 0    | 0 |
| PRJNA521949 | SRR8567895 | Apis mellifera | paired end | 2019 | 2018 | 2018 | Taiwan | Asia          | 11071136  | 825      | 0.01  | 0    | 0 |
| PRJNA521949 | SRR8567896 | Apis mellifera | paired end | 2019 | 2018 | 2018 | Taiwan | Asia          | 10844048  | 497      | 0     | 0    | 0 |
| PRJNA521949 | SRR8567897 | Apis mellifera | paired end | 2019 | 2018 | 2018 | Taiwan | Asia          | 23922560  | 749      | 0     | 0    | 0 |
| PRJNA521949 | SRR8567898 | Apis mellifera | paired end | 2019 | 2018 | 2018 | Taiwan | Asia          | 12730504  | 512      | 0     | 0    | 0 |
| PRJNA521949 | SRR8567899 | Apis mellifera | paired end | 2019 | 2018 | 2018 | Taiwan | Asia          | 19464522  | 834      | 0     | 0    | 0 |
| PRJNA521949 | SRR8567900 | Apis mellifera | paired end | 2019 | 2018 | 2018 | Taiwan | Asia          | 22308188  | 3708     | 0.02  | 0    | 0 |
| PRJNA521949 | SRR8567901 | Apis mellifera | paired end | 2019 | 2018 | 2018 | Taiwan | Asia          | 44538322  | 87610    | 0.2   | 0    | 0 |
| PRJNA521949 | SRR8567902 | Apis mellifera | paired end | 2019 | 2018 | 2018 | Taiwan | Asia          | 18831416  | 1025     | 0.01  | 0    | 0 |
| PRJNA521949 | SRR8567903 | Apis mellifera | paired end | 2019 | 2018 | 2018 | Taiwan | Asia          | 20523770  | 896      | 0     | 0    | 0 |
| PRJNA521949 | SRR8567904 | Apis mellifera | paired end | 2019 | 2018 | 2018 | Taiwan | Asia          | 7326144   | 82       | 0     | 0    | 0 |
| PRJNA521949 | SRR8567905 | Apis mellifera | paired end | 2019 | 2018 | 2018 | Taiwan | Asia          | 36517912  | 444      | 0     | 0    | 0 |
| PRJNA521949 | SRR8567906 | Apis mellifera | paired end | 2019 | 2018 | 2018 | Taiwan | Asia          | 88924928  | 3334     | 0     | 0    | 0 |
| PRJNA521949 | SRR8567907 | Apis mellifera | paired end | 2019 | 2018 | 2018 | Taiwan | Asia          | 86740316  | 14282575 | 16.47 | 0    | 0 |
| PRJNA521949 | SRR8567908 | Apis mellifera | paired end | 2019 | 2018 | 2018 | Taiwan | Asia          | 35792442  | 248      | 0     | 0    | 0 |
| PRJNA521949 | SRR8567909 | Apis mellifera | paired end | 2019 | 2018 | 2018 | Taiwan | Asia          | 12287256  | 93       | 0     | 0    | 0 |
| PRJNA521949 | SRR8567910 | Apis mellifera | paired end | 2019 | 2018 | 2018 | Taiwan | Asia          | 38990652  | 272      | 0     | 0    | 0 |
| PRJNA521949 | SRR8567911 | Apis mellifera | paired end | 2019 | 2018 | 2018 | Taiwan | Asia          | 31308148  | 274      | 0     | 0    | 0 |
| PRJNA521949 | SRR8567912 | Apis mellifera | paired end | 2019 | 2018 | 2018 | Taiwan | Asia          | 33471874  | 300      | 0     | 0    | 0 |
| PRJNA521949 | SRR8567913 | Apis mellifera | paired end | 2019 | 2018 | 2018 | Taiwan | Asia          | 19560138  | 3355     | 0.02  | 0    | 0 |
| PRJNA521949 | SRR8567914 | Apis mellifera | paired end | 2019 | 2018 | 2018 | Taiwan | Asia          | 31208684  | 248      | 0     | 0    | 0 |
| PRJNA521949 | SRR8567915 | Apis mellifera | paired end | 2019 | 2018 | 2018 | Taiwan | Asia          | 60377388  | 7784     | 0.01  | 0    | 0 |
| PRJNA521949 | SRR8567916 | Apis mellifera | paired end | 2019 | 2018 | 2018 | Taiwan | Asia          | 20907978  | 4639     | 0.02  | 0    | 0 |
| PRJNA521949 | SRR8567917 | Apis mellifera | paired end | 2019 | 2018 | 2018 | Taiwan | Asia          | 38006542  | 276      | 0     | 0    | 0 |
| PRJNA521949 | SRR8567918 | Apis mellifera | paired end | 2019 | 2018 | 2018 | Taiwan | Asia          | 16589418  | 909      | 0.01  | 0    | 0 |
| PRJNA521949 | SRR8567919 | Apis mellifera | paired end | 2019 | 2018 | 2018 | Taiwan | Asia          | 16801578  | 500      | 0     | 0    | 0 |
| PRJNA521949 | SRR8567920 | Apis mellifera | paired end | 2019 | 2018 | 2018 | Taiwan | Asia          | 12461456  | 239609   | 1.92  | 0    | 0 |
| PRJNA521949 | SRR8567921 | Apis mellifera | paired end | 2019 | 2018 | 2018 | Taiwan | Asia          | 13626226  | 430      | 0     | 0    | 0 |
| PRJNA521949 | SRR8567922 | Apis mellifera | paired end | 2019 | 2018 | 2018 | Taiwan | Asia          | 113568310 | 7991     | 0.01  | 0    | 0 |
| PRJNA521949 | SRR8567923 | Apis mellifera | paired end | 2019 | 2018 | 2018 | Taiwan | Asia          | 17550116  | 563      | 0     | 0    | 0 |
| PRJNA521949 | SRR8567924 | Apis mellifera | paired end | 2019 | 2018 | 2018 | Taiwan | Asia          | 14844286  | 507      | 0     | 0    | 0 |
| PRJNA521949 | SRR8567925 | Apis mellifera | paired end | 2019 | 2018 | 2018 | Taiwan | Asia          | 16421956  | 525      | 0     | 0    | 0 |
| PRJNA521949 | SRR8567926 | Apis mellifera | paired end | 2019 | 2018 | 2018 | Taiwan | Asia          | 37752276  | 269      | 0     | 0    | 0 |
| PRJNA521949 | SRR8567927 | Apis mellifera | paired end | 2019 | 2018 | 2018 | Taiwan | Asia          | 15017552  | 950      | 0.01  | 0    | 0 |
| PRJNA521949 | SRR8567928 | Apis mellifera | paired end | 2019 | 2018 | 2018 | Taiwan | Asia          | 17513782  | 650      | 0     | 0    | 0 |
| PRJNA521949 | SRR8567929 | Apis mellifera | paired end | 2019 | 2018 | 2018 | Taiwan | Asia          | 77277366  | 5392     | 0.01  | 0    | 0 |
| PRJNA521949 | SRR8567930 | Apis mellifera | paired end | 2019 | 2018 | 2018 | Taiwan | Asia          | 19180708  | 862      | 0     | 0    | 0 |
| PRJNA521949 | SRR8567931 | Apis mellifera | paired end | 2019 | 2018 | 2018 | Taiwan | Asia          | 19910742  | 868      | 0     | 0    | 0 |
| PRJNA521949 | SRR8567932 | Apis mellifera | paired end | 2019 | 2018 | 2018 | Taiwan | Asia          | 34973778  | 427      | 0     | 0    | 0 |
| PRJNA521949 | SRR8567933 | Apis mellifera | paired end | 2019 | 2018 | 2018 | Taiwan | Asia          | 123983530 | 5628     | 0     | 0    | 0 |
| PRJNA521949 | SRR8567934 | Apis mellifera | paired end | 2019 | 2018 | 2018 | Taiwan | Asia          | 79269970  | 4182     | 0.01  | 0    | 0 |
| PRJNA521949 | SRR8567935 | Apis mellifera | paired end | 2019 | 2018 | 2018 | Taiwan | Asia          | 19921192  | 35390    | 0.18  | 0    | 0 |
| PRJNA521949 | SRR8567936 | Apis mellifera | paired end | 2019 | 2018 | 2018 | Taiwan | Asia          | 24937580  | 32542    | 0.13  | 0    | 0 |
| PRJNA521949 | SRR8567937 | Apis mellifera | paired end | 2019 | 2018 | 2018 | Taiwan | Asia          | 20628728  | 2274     | 0.01  | 0    | 0 |
| PRJNA521949 | SRR8567938 | Apis mellifera | paired end | 2019 | 2018 | 2018 | Taiwan | Asia          | 18675190  | 913      | 0     | 0    | 0 |
| PRJNA521949 | SRR8567939 | Apis mellifera | paired end | 2019 | 2018 | 2018 | Taiwan | Asia          | 16818730  | 632      | 0     | 0    | 0 |
| PRJNA521949 | SRR8567940 | Apis mellifera | paired end | 2019 | 2018 | 2018 | Taiwan | Asia          | 24549408  | 931      | 0     | 0    | 0 |
| PRJNA521949 | SRR8567941 | Apis mellifera | paired end | 2019 | 2018 | 2018 | Taiwan | Asia          | 14856954  | 450      | 0     | 0    | 0 |
| PRJNA521949 | SRR8567942 | Apis mellifera | paired end | 2019 | 2018 | 2018 | Taiwan | Asia          | 23484842  | 1542     | 0.01  | 0    | 0 |
| PRJNA521949 | SRR8567943 | Apis mellifera | paired end | 2019 | 2018 | 2018 | Taiwan | Asia          | 35053370  | 274      | 0     | 0    | 0 |
| PRJNA521949 | SRR8567944 | Apis mellifera | paired end | 2019 | 2018 | 2018 | Taiwan | Asia          | 43168074  | 7516     | 0.02  | 0    | 0 |
| PRJNA521949 | SRR8567945 | Apis mellifera | paired end | 2019 | 2018 | 2018 | Taiwan | Asia          | 19768946  | 139      | 0     | 0    | 0 |
| PRJNA521949 | SRR8567946 | Apis mellifera | paired end | 2019 | 2018 | 2018 | Taiwan | Asia          | 35949398  | 533      | 0     | 0    | 0 |
| PRJNA521949 | SRR8567947 | Apis mellifera | paired end | 2019 | 2018 | 2018 | Taiwan | Asia          | 73755318  | 1635535  | 2.22  | 0    | 0 |
| PRJNA521949 | SRR8567948 | Apis mellifera | paired end | 2019 | 2018 | 2018 | Taiwan | Asia          | 84164988  | 5751     | 0.01  | 0    | 0 |
| PRJNA521949 | SRR8567949 | Apis mellifera | paired end | 2019 | 2018 | 2018 | Taiwan | Asia          | 12182660  | 1098     | 0.01  | 0    | 0 |
| PRJNA521949 | SRR8567950 | Apis mellifera | paired end | 2019 | 2018 | 2018 | Taiwan | Asia          | 34350328  | 345      | 0     | 0    | 0 |
| PRJNA521949 | SRR8567951 | Apis mellifera | paired end |      |      |      |        |               |           |          |       |      |   |

|             |            |                |            |      |      |      |        |               |           |          |       |          |       |
|-------------|------------|----------------|------------|------|------|------|--------|---------------|-----------|----------|-------|----------|-------|
| PRJNA495845 | SRR8754029 | Apis mellifera | paired end | 2019 | 2012 | 2012 | USA    | North America | 29212226  | 512990   | 1.76  | 0        | 0     |
| PRJNA495845 | SRR8754030 | Apis mellifera | paired end | 2019 | 2012 | 2012 | USA    | North America | 32634896  | 3371617  | 10.33 | 1        | 0     |
| PRJNA495845 | SRR8754031 | Apis mellifera | paired end | 2019 | 2012 | 2012 | USA    | North America | 36899356  | 10916    | 0.03  | 0        | 0     |
| PRJNA495845 | SRR8754032 | Apis mellifera | paired end | 2019 | 2012 | 2012 | USA    | North America | 32962124  | 1218     | 0     | 0        | 0     |
| PRJNA495845 | SRR8754033 | Apis mellifera | paired end | 2019 | 2012 | 2012 | USA    | North America | 35569972  | 1168     | 0     | 0        | 0     |
| PRJNA495845 | SRR8754034 | Apis mellifera | paired end | 2019 | 2012 | 2012 | USA    | North America | 31979064  | 581      | 0     | 0        | 0     |
| PRJNA495845 | SRR8754035 | Apis mellifera | paired end | 2019 | 2012 | 2012 | USA    | North America | 37409362  | 599      | 0     | 0        | 0     |
| PRJNA495845 | SRR8754036 | Apis mellifera | paired end | 2019 | 2012 | 2012 | USA    | North America | 33156916  | 70959    | 0.21  | 4        | 0     |
| PRJNA495845 | SRR8754037 | Apis mellifera | paired end | 2019 | 2012 | 2012 | USA    | North America | 30570846  | 451      | 0     | 2        | 0     |
| PRJNA495845 | SRR8754038 | Apis mellifera | paired end | 2019 | 2012 | 2012 | USA    | North America | 34058376  | 78248    | 0.23  | 1        | 0     |
| PRJNA495845 | SRR8754039 | Apis mellifera | paired end | 2019 | 2012 | 2012 | USA    | North America | 29089854  | 11874687 | 40.82 | 840      | 0     |
| PRJNA495845 | SRR8754040 | Apis mellifera | paired end | 2019 | 2012 | 2012 | USA    | North America | 24981824  | 83745    | 0.34  | 0        | 0     |
| PRJNA495845 | SRR8754041 | Apis mellifera | paired end | 2019 | 2012 | 2012 | USA    | North America | 21312870  | 749      | 0     | 0        | 0     |
| PRJNA495845 | SRR8754042 | Apis mellifera | paired end | 2019 | 2012 | 2012 | USA    | North America | 42523320  | 694      | 0     | 0        | 0     |
| PRJNA495845 | SRR8754043 | Apis mellifera | paired end | 2019 | 2012 | 2012 | USA    | North America | 26427434  | 3698     | 0.01  | 0        | 0     |
| PRJNA495845 | SRR8754044 | Apis mellifera | paired end | 2019 | 2012 | 2012 | USA    | North America | 20601326  | 7119     | 0.03  | 0        | 0     |
| PRJNA495845 | SRR8754045 | Apis mellifera | paired end | 2019 | 2012 | 2012 | USA    | North America | 29901958  | 1705     | 0.01  | 0        | 0     |
| PRJNA495845 | SRR8754046 | Apis mellifera | paired end | 2019 | 2012 | 2012 | USA    | North America | 23700278  | 270      | 0     | 0        | 0     |
| PRJNA495845 | SRR8754047 | Apis mellifera | paired end | 2019 | 2012 | 2012 | USA    | North America | 20982360  | 315      | 0     | 0        | 0     |
| PRJNA495845 | SRR8754048 | Apis mellifera | paired end | 2019 | 2012 | 2012 | USA    | North America | 31842020  | 577      | 0     | 0        | 0     |
| PRJNA495845 | SRR8754049 | Apis mellifera | paired end | 2019 | 2012 | 2012 | USA    | North America | 29237770  | 461      | 0     | 0        | 0     |
| PRJNA495845 | SRR8754050 | Apis mellifera | paired end | 2019 | 2012 | 2012 | USA    | North America | 29362664  | 2699     | 0.01  | 0        | 0     |
| PRJNA495845 | SRR8754051 | Apis mellifera | paired end | 2019 | 2012 | 2012 | USA    | North America | 28541336  | 909      | 0     | 0        | 0     |
| PRJNA495845 | SRR8754052 | Apis mellifera | paired end | 2019 | 2012 | 2012 | USA    | North America | 27522294  | 678      | 0     | 0        | 0     |
| PRJNA521949 | SRR8769531 | Apis mellifera | paired end | 2019 | 2018 | 2018 | Taiwan | Asia          | 189701076 | 1865209  | 0.98  | 0        | 0     |
| PRJNA521949 | SRR8769532 | Apis mellifera | paired end | 2019 | 2018 | 2018 | Taiwan | Asia          | 166597826 | 6004     | 0     | 0        | 0     |
| PRJNA521949 | SRR8769533 | Apis mellifera | paired end | 2019 | 2018 | 2018 | Taiwan | Asia          | 142158270 | 10755168 | 7.57  | 0        | 0     |
| PRJNA521949 | SRR8769534 | Apis mellifera | paired end | 2019 | 2018 | 2018 | Taiwan | Asia          | 122640330 | 555548   | 0.45  | 0        | 0     |
| PRJNA521949 | SRR8769535 | Apis mellifera | paired end | 2019 | 2018 | 2018 | Taiwan | Asia          | 182654420 | 152428   | 0.08  | 0        | 0     |
| PRJNA521949 | SRR8769536 | Apis mellifera | paired end | 2019 | 2018 | 2018 | Taiwan | Asia          | 96874536  | 9097373  | 9.39  | 0        | 0     |
| PRJNA521949 | SRR8769537 | Apis mellifera | paired end | 2019 | 2018 | 2018 | Taiwan | Asia          | 137253504 | 15627    | 0.01  | 0        | 0     |
| PRJNA521949 | SRR8769538 | Apis mellifera | paired end | 2019 | 2018 | 2018 | Taiwan | Asia          | 137987144 | 17836    | 0.01  | 0        | 0     |
| PRJNA521949 | SRR8769539 | Apis mellifera | paired end | 2019 | 2018 | 2018 | Taiwan | Asia          | 136378444 | 11532    | 0.01  | 0        | 0     |
| PRJNA521949 | SRR8769540 | Apis mellifera | paired end | 2019 | 2018 | 2018 | Taiwan | Asia          | 150885934 | 219356   | 0.15  | 0        | 0     |
| PRJNA521949 | SRR8769541 | Apis mellifera | paired end | 2019 | 2018 | 2018 | Taiwan | Asia          | 136816074 | 5084     | 0     | 0        | 0     |
| PRJNA521949 | SRR8769542 | Apis mellifera | paired end | 2019 | 2018 | 2018 | Taiwan | Asia          | 186146500 | 8677     | 0     | 0        | 0     |
| PRJNA521949 | SRR8769543 | Apis mellifera | paired end | 2019 | 2018 | 2018 | Taiwan | Asia          | 113920108 | 3259     | 0     | 0        | 0     |
| PRJNA521949 | SRR8769544 | Apis mellifera | paired end | 2019 | 2018 | 2018 | Taiwan | Asia          | 127599446 | 4166     | 0     | 0        | 0     |
| PRJNA521949 | SRR8769545 | Apis mellifera | paired end | 2019 | 2018 | 2018 | Taiwan | Asia          | 101274712 | 3545     | 0     | 0        | 0     |
| PRJNA530116 | SRR8823603 | Apis mellifera | paired end | 2019 | 2018 | 2018 | NA     | NA            | 22701638  | 0        | 0     | 0        | 0     |
| PRJNA530116 | SRR8823604 | Apis mellifera | paired end | 2019 | 2018 | 2018 | NA     | NA            | 18644624  | 0        | 0     | 0        | 0     |
| PRJNA530116 | SRR8823605 | Apis mellifera | paired end | 2019 | 2018 | 2018 | NA     | NA            | 20446520  | 0        | 0     | 0        | 0     |
| PRJNA530116 | SRR8823606 | Apis mellifera | paired end | 2019 | 2018 | 2018 | NA     | NA            | 21512882  | 4        | 0     | 0        | 0     |
| PRJNA530116 | SRR8823607 | Apis mellifera | paired end | 2019 | 2018 | 2018 | NA     | NA            | 19777484  | 0        | 0     | 0        | 0     |
| PRJNA530116 | SRR8823608 | Apis mellifera | paired end | 2019 | 2018 | 2018 | NA     | NA            | 22786038  | 0        | 0     | 0        | 0     |
| PRJNA531527 | SRR8867392 | Apis mellifera | paired end | 2019 | 2012 | 2012 | USA    | North America | 27672054  | 10135743 | 36.63 | 90       | 0     |
| PRJNA531527 | SRR8867393 | Apis mellifera | paired end | 2019 | 2012 | 2012 | USA    | North America | 35562276  | 7753299  | 21.8  | 21717    | 0.06  |
| PRJNA531527 | SRR8867394 | Apis mellifera | paired end | 2019 | 2012 | 2012 | USA    | North America | 47278224  | 29768635 | 62.96 | 38154    | 0.08  |
| PRJNA531527 | SRR8867395 | Apis mellifera | paired end | 2019 | 2012 | 2012 | USA    | North America | 24509166  | 36513    | 0.15  | 33238    | 0.14  |
| PRJNA207482 | SRR893021  | Apis mellifera | paired end | 2014 | NA   | 2012 | NA     | NA            | 31171884  | 5940     | 0.02  | 0        | 0     |
| PRJNA207482 | SRR893022  | Apis mellifera | paired end | 2014 | NA   | 2012 | NA     | NA            | 30206240  | 5759     | 0.02  | 0        | 0     |
| PRJNA207482 | SRR893023  | Apis mellifera | paired end | 2014 | 2011 | 2011 | USA    | North America | 28501132  | 1147     | 0     | 0        | 0     |
| PRJNA207482 | SRR893024  | Apis mellifera | paired end | 2014 | 2011 | 2011 | USA    | North America | 27684600  | 1089     | 0     | 0        | 0     |
| PRJNA207482 | SRR893025  | Apis mellifera | paired end | 2014 | 2011 | 2011 | USA    | North America | 28126698  | 3072     | 0.01  | 0        | 0     |
| PRJNA207482 | SRR893026  | Apis mellifera | paired end | 2014 | 2011 | 2011 | USA    | North America | 27576452  | 2915     | 0.01  | 0        | 0     |
| PRJNA207482 | SRR893027  | Apis mellifera | paired end | 2014 | 2011 | 2011 | USA    | North America | 35688708  | 722      | 0     | 0        | 0     |
| PRJNA207482 | SRR893028  | Apis mellifera | paired end | 2014 | 2011 | 2011 | USA    | North America | 34684012  | 679      | 0     | 0        | 0     |
| PRJNA207482 | SRR893029  | Apis mellifera | paired end | 2014 | 2011 | 2011 | USA    | North America | 29592314  | 280      | 0     | 0        | 0     |
| PRJNA207482 | SRR893030  | Apis mellifera | paired end | 2014 | 2011 | 2011 | USA    | North America | 28699416  | 358      | 0     | 0        | 0     |
| PRJNA207482 | SRR893031  | Apis mellifera | paired end | 2014 | 2011 | 2011 | USA    | North America | 29026682  | 277      | 0     | 0        | 0     |
| PRJNA207482 | SRR893032  | Apis mellifera | paired end | 2014 | 2011 | 2011 | USA    | North America | 28217372  | 256      | 0     | 0        | 0     |
| PRJNA207482 | SRR893033  | Apis mellifera | paired end | 2014 | 2011 | 2011 | USA    | North America | 22991690  | 4003     | 0.02  | 0        | 0     |
| PRJNA207482 | SRR893034  | Apis mellifera | paired end | 2014 | 2011 | 2011 | USA    | North America | 22326184  | 3784     | 0.02  | 0        | 0     |
| PRJNA207482 | SRR893035  | Apis mellifera | paired end | 2014 | 2011 | 2011 | USA    | North America | 37104640  | 10387    | 0.03  | 0        | 0     |
| PRJNA207482 | SRR893036  | Apis mellifera | paired end | 2014 | 2011 | 2011 | USA    | North America | 36086676  | 9792     | 0.03  | 0        | 0     |
| PRJNA207482 | SRR893037  | Apis mellifera | paired end | 2014 | 2011 | 2011 | USA    | North America | 29784172  | 9517     | 0.03  | 0        | 0     |
| PRJNA207482 | SRR893038  | Apis mellifera | paired end | 2014 | 2011 | 2011 | USA    | North America | 28785676  | 8956     | 0.03  | 0        | 0     |
| PRJNA207482 | SRR893039  | Apis mellifera | paired end | 2014 | 2011 | 2011 | USA    | North America | 33704050  | 2311     | 0.01  | 0        | 0     |
| PRJNA207482 | SRR893040  | Apis mellifera | paired end | 2014 | 2011 | 2011 | USA    | North America | 32712474  | 2255     | 0.01  | 0        | 0     |
| PRJNA207482 | SRR893041  | Apis mellifera | paired end | 2014 | 2011 | 2011 | USA    | North America | 32029802  | 8801     | 0.03  | 0        | 0     |
| PRJNA207482 | SRR893042  | Apis mellifera | paired end | 2014 | 2011 | 2011 | USA    | North America | 30946726  | 8159     | 0.03  | 0        | 0     |
| PRJNA207482 | SRR893043  | Apis mellifera | paired end | 2014 | 2011 | 2011 | USA    | North America | 35414296  | 6125     | 0.02  | 0        | 0     |
| PRJNA207482 | SRR893044  | Apis mellifera | paired end | 2014 | 2011 | 2011 | USA    | North America | 34352316  | 5545     | 0.02  | 0        | 0     |
| PRJNA542364 | SRR9041546 | Apis mellifera | paired end | 2020 | 2017 | 2017 | USA    | North America | 109245238 | 23506    | 0.02  | 17366    | 0.02  |
| PRJNA542364 | SRR9041547 | Apis mellifera | paired end | 2020 | 2017 | 2017 | USA    | North America | 97702914  | 689434   | 0.71  | 20988415 | 21.48 |
| PRJNA542364 | SRR9041548 | Apis mellifera | paired end | 2020 | 2017 | 2017 | USA    | North America | 97240676  | 126282   | 0.13  | 2966203  | 3.05  |
| PRJNA542364 | SRR9041549 | Apis mellifera | paired end | 2020 | 2017 | 2017 | USA    | North America | 87784410  | 205551   | 0.23  | 5394685  | 6.15  |
| PRJNA542364 | SRR9041550 | Apis mellifera | paired end | 2020 | 2017 | 2017 | USA    | North America | 89019172  | 7        | 0     | 38       | 0     |
| PRJNA542364 | SRR9041551 | Apis mellifera | paired end | 2020 | 2017 | 2017 | USA    | North America | 96046446  | 41       | 0     | 606      | 0     |
| PRJNA542364 | SRR9041552 | Apis mellifera | paired end | 2020 | 2017 | 2017 | USA    | North America | 92924064  | 39       | 0     | 801      | 0     |
| PRJNA542364 | SRR9041553 | Apis mellifera | paired end | 2020 | 2017 | 2017 | USA    | North America | 91687404  | 139      | 0     | 125      | 0     |
| PRJNA542364 | SRR9041554 | Apis mellifera | paired end | 2020 | 2017 | 2017 | USA    | North America | 87030102  | 4208     | 0     | 442      | 0     |
| PRJNA209400 | SRR922438  | Apis mellifera | paired end | 2014 | NA   | 2012 | NA     | NA            | 66868224  | 0        | 0     | 0        | 0     |
| PRJNA209400 | SRR922440  | Apis mellifera | paired end | 2014 | NA   | 2012 | NA     | NA            | 98761682  | 0        | 0     | 0        | 0     |
| PRJNA549281 | SRR9312721 | Apis mellifera | paired end | 2021 | NA   | 2019 | NA     | NA            | 56019142  | 0        | 0     | 0        | 0     |
| PRJNA549281 | SRR9312722 | Apis mellifera | paired end | 2021 | NA   | 2019 | NA     | NA            | 75471780  | 0        | 0     | 0        | 0     |
| PRJNA549281 | SRR9312723 | Apis mellifera | paired end | 2021 | NA   | 2019 | NA     | NA            | 82149974  | 0        | 0     | 0        | 0     |
| PRJNA549281 | SRR9312724 | Apis mellifera | paired end | 2021 | NA   | 2019 | NA     | NA            | 68629974  | 0        | 0     | 0        | 0     |
| PRJNA549281 | SRR9312725 | Apis mellifera | paired end | 2021 | NA   | 2019 | NA     | NA            | 64583486  | 0        | 0     | 0        | 0     |
| PRJNA549281 | SRR9312726 | Apis mellifera | paired end | 2021 | NA   | 2019 | NA     | NA            | 72964220  | 0        | 0     | 0        | 0     |
| PRJNA549281 | SRR9312727 | Apis mellifera | paired end | 2021 | NA   | 2019 | NA     | NA            | 77747452  | 0        | 0     | 0        | 0     |
| PRJNA549281 | SRR9312728 | Apis mellifera | paired end | 2021 | NA   | 2019 | NA     | NA            | 65422338  | 0        | 0     | 0        | 0     |
| PRJNA549281 | SRR9312729 | Apis mellifera | paired end | 2021 | NA   | 2019 | NA     | NA            | 71781546  | 0        | 0     | 0        | 0     |
| PRJNA211831 | SRR935172  | Apis mellifera | paired end | 2014 | NA   | 2012 | NA     | NA            | 66042848  | 0        | 0     | 0        | 0     |
| PRJNA211831 | SRR935173  | Apis mellifera | paired end | 2014 | NA   | 2012 | NA     | NA            | 61323428  | 0        | 0     | 0        | 0     |
| PRJNA211831 | SRR935174  | Apis mellifera | paired end | 2014 | NA</ |      |        |               |           |          |       |          |       |

|             |             |                   |            |      |      |      |         |        |          |     |      |     |      |
|-------------|-------------|-------------------|------------|------|------|------|---------|--------|----------|-----|------|-----|------|
| PRJEB9366   | ERR883771   | Bombus terrestris | single end | 2015 | NA   | 2013 | NA      | NA     | 14589067 | 0   | 0    | 0   | 0    |
| PRJEB9366   | ERR883772   | Bombus terrestris | single end | 2015 | NA   | 2013 | NA      | NA     | 14720280 | 0   | 0    | 0   | 0    |
| PRJEB9366   | ERR883773   | Bombus terrestris | single end | 2015 | NA   | 2013 | NA      | NA     | 16266154 | 0   | 0    | 0   | 0    |
| PRJEB9366   | ERR883774   | Bombus terrestris | single end | 2015 | NA   | 2013 | NA      | NA     | 14603360 | 0   | 0    | 0   | 0    |
| PRJEB9366   | ERR883775   | Bombus terrestris | single end | 2015 | NA   | 2013 | NA      | NA     | 16310880 | 0   | 0    | 0   | 0    |
| PRJEB9366   | ERR883776   | Bombus terrestris | single end | 2015 | NA   | 2013 | NA      | NA     | 19235640 | 0   | 0    | 0   | 0    |
| PRJEB9366   | ERR883777   | Bombus terrestris | single end | 2015 | NA   | 2013 | NA      | NA     | 16800890 | 0   | 0    | 0   | 0    |
| PRJEB9366   | ERR883778   | Bombus terrestris | single end | 2015 | NA   | 2013 | NA      | NA     | 15488784 | 0   | 0    | 0   | 0    |
| PRJEB9366   | ERR883779   | Bombus terrestris | single end | 2015 | NA   | 2013 | NA      | NA     | 14338587 | 0   | 0    | 0   | 0    |
| PRJEB9366   | ERR883780   | Bombus terrestris | single end | 2015 | NA   | 2013 | NA      | NA     | 17780019 | 0   | 0    | 0   | 0    |
| PRJEB9366   | ERR883781   | Bombus terrestris | single end | 2015 | NA   | 2013 | NA      | NA     | 18791069 | 0   | 0    | 0   | 0    |
| PRJEB9366   | ERR883782   | Bombus terrestris | single end | 2015 | NA   | 2013 | NA      | NA     | 13855780 | 0   | 0    | 0   | 0    |
| PRJEB9366   | ERR883783   | Bombus terrestris | single end | 2015 | NA   | 2013 | NA      | NA     | 20696845 | 0   | 0    | 0   | 0    |
| PRJEB9366   | ERR883784   | Bombus terrestris | single end | 2015 | NA   | 2013 | NA      | NA     | 17339549 | 0   | 0    | 0   | 0    |
| PRJEB9366   | ERR883785   | Bombus terrestris | single end | 2015 | NA   | 2013 | NA      | NA     | 16057607 | 0   | 0    | 0   | 0    |
| PRJEB9366   | ERR883786   | Bombus terrestris | single end | 2015 | NA   | 2013 | NA      | NA     | 17407931 | 0   | 0    | 0   | 0    |
| PRJEB9366   | ERR883787   | Bombus terrestris | single end | 2015 | NA   | 2013 | NA      | NA     | 17962612 | 0   | 0    | 0   | 0    |
| PRJEB9366   | ERR883788   | Bombus terrestris | single end | 2015 | NA   | 2013 | NA      | NA     | 16388426 | 0   | 0    | 0   | 0    |
| PRJEB9366   | ERR883789   | Bombus terrestris | single end | 2015 | NA   | 2013 | NA      | NA     | 17050136 | 0   | 0    | 0   | 0    |
| PRJEB9366   | ERR883790   | Bombus terrestris | single end | 2015 | NA   | 2013 | NA      | NA     | 17154058 | 0   | 0    | 0   | 0    |
| PRJEB9366   | ERR883791   | Bombus terrestris | single end | 2015 | NA   | 2013 | NA      | NA     | 16956446 | 0   | 0    | 0   | 0    |
| PRJEB9366   | ERR883792   | Bombus terrestris | single end | 2015 | NA   | 2013 | NA      | NA     | 23722321 | 0   | 0    | 0   | 0    |
| PRJEB9366   | ERR883793   | Bombus terrestris | single end | 2015 | NA   | 2013 | NA      | NA     | 19589338 | 0   | 0    | 0   | 0    |
| PRJEB9937   | ERR968678   | Bombus terrestris | single end | 2015 | NA   | 2013 | NA      | NA     | 16499033 | 0   | 0    | 0   | 0    |
| PRJEB9937   | ERR968679   | Bombus terrestris | single end | 2015 | NA   | 2013 | NA      | NA     | 39907164 | 0   | 0    | 0   | 0    |
| PRJNA753273 | SRR15402281 | Bombus terrestris | single end | 2021 | 2019 | 2019 | Turkey  | Asia   | 50021104 | 2   | 0    | 0   | 0    |
| PRJNA753273 | SRR15402282 | Bombus terrestris | single end | 2021 | 2019 | 2019 | Turkey  | Asia   | 49731094 | 0   | 0    | 0   | 0    |
| PRJNA753273 | SRR15402283 | Bombus terrestris | single end | 2021 | 2019 | 2019 | Turkey  | Asia   | 49823898 | 0   | 0    | 0   | 0    |
| PRJNA753273 | SRR15402284 | Bombus terrestris | single end | 2021 | 2019 | 2019 | Turkey  | Asia   | 49369054 | 0   | 0    | 1   | 0    |
| PRJNA753273 | SRR15402285 | Bombus terrestris | single end | 2021 | 2019 | 2019 | Turkey  | Asia   | 49157674 | 67  | 0    | 499 | 0    |
| PRJNA753273 | SRR15402286 | Bombus terrestris | single end | 2021 | 2019 | 2019 | Turkey  | Asia   | 57250656 | 117 | 0    | 300 | 0    |
| PRJNA753273 | SRR15402287 | Bombus terrestris | single end | 2021 | 2019 | 2019 | Turkey  | Asia   | 48803200 | 515 | 0    | 579 | 0    |
| PRJNA753273 | SRR15402288 | Bombus terrestris | single end | 2021 | 2019 | 2019 | Turkey  | Asia   | 41726990 | 2   | 0    | 2   | 0    |
| PRJNA753273 | SRR15402289 | Bombus terrestris | single end | 2021 | 2019 | 2019 | Turkey  | Asia   | 49544528 | 0   | 0    | 0   | 0    |
| PRJNA753273 | SRR15402290 | Bombus terrestris | single end | 2021 | 2019 | 2019 | Turkey  | Asia   | 48577950 | 0   | 0    | 0   | 0    |
| PRJNA753273 | SRR15402291 | Bombus terrestris | single end | 2021 | 2019 | 2019 | Turkey  | Asia   | 48968070 | 1   | 0    | 0   | 0    |
| PRJNA753273 | SRR15402292 | Bombus terrestris | single end | 2021 | 2019 | 2019 | Turkey  | Asia   | 48317646 | 0   | 0    | 3   | 0    |
| PRJNA271157 | SRR1734818  | Bombus terrestris | single end | 2015 | NA   | 2013 | NA      | NA     | 5669480  | 0   | 0    | 1   | 0    |
| PRJNA271157 | SRR1734819  | Bombus terrestris | single end | 2015 | NA   | 2013 | NA      | NA     | 7029923  | 0   | 0    | 1   | 0    |
| PRJNA271157 | SRR1734820  | Bombus terrestris | single end | 2015 | NA   | 2013 | NA      | NA     | 2996910  | 0   | 0    | 0   | 0    |
| PRJNA271157 | SRR1734821  | Bombus terrestris | single end | 2015 | NA   | 2013 | NA      | NA     | 3950811  | 0   | 0    | 0   | 0    |
| PRJNA271157 | SRR1734822  | Bombus terrestris | single end | 2015 | NA   | 2013 | NA      | NA     | 4101572  | 0   | 0    | 0   | 0    |
| PRJNA271157 | SRR1734823  | Bombus terrestris | single end | 2015 | NA   | 2013 | NA      | NA     | 3934876  | 0   | 0    | 0   | 0    |
| PRJNA271157 | SRR1734824  | Bombus terrestris | single end | 2015 | NA   | 2013 | NA      | NA     | 4659419  | 0   | 0    | 0   | 0    |
| PRJNA271157 | SRR1734825  | Bombus terrestris | single end | 2015 | NA   | 2013 | NA      | NA     | 5506360  | 0   | 0    | 0   | 0    |
| PRJNA295976 | SRR2396633  | Bombus terrestris | single end | 2015 | NA   | 2013 | NA      | NA     | 6325143  | 14  | 0    | 0   | 0    |
| PRJNA295976 | SRR2396634  | Bombus terrestris | single end | 2015 | NA   | 2013 | NA      | NA     | 7638890  | 3   | 0    | 0   | 0    |
| PRJNA295976 | SRR2396635  | Bombus terrestris | single end | 2015 | NA   | 2013 | NA      | NA     | 7854028  | 1   | 0    | 0   | 0    |
| PRJNA295976 | SRR2396636  | Bombus terrestris | single end | 2015 | NA   | 2013 | NA      | NA     | 6855909  | 0   | 0    | 0   | 0    |
| PRJNA295976 | SRR2396637  | Bombus terrestris | single end | 2015 | NA   | 2013 | NA      | NA     | 8969750  | 0   | 0    | 0   | 0    |
| PRJNA295976 | SRR2396638  | Bombus terrestris | single end | 2015 | NA   | 2013 | NA      | NA     | 9081069  | 1   | 0    | 0   | 0    |
| PRJNA295976 | SRR2396639  | Bombus terrestris | single end | 2015 | NA   | 2013 | NA      | NA     | 9116604  | 0   | 0    | 0   | 0    |
| PRJNA295976 | SRR2396640  | Bombus terrestris | single end | 2015 | NA   | 2013 | NA      | NA     | 8378724  | 1   | 0    | 0   | 0    |
| PRJNA295976 | SRR2396641  | Bombus terrestris | single end | 2015 | NA   | 2013 | NA      | NA     | 7204794  | 0   | 0    | 0   | 0    |
| PRJNA295976 | SRR2396642  | Bombus terrestris | single end | 2015 | NA   | 2013 | NA      | NA     | 6492516  | 4   | 0    | 0   | 0    |
| PRJNA295976 | SRR2396643  | Bombus terrestris | single end | 2015 | NA   | 2013 | NA      | NA     | 7611257  | 0   | 0    | 0   | 0    |
| PRJNA295976 | SRR2396644  | Bombus terrestris | single end | 2015 | NA   | 2013 | NA      | NA     | 8445768  | 3   | 0    | 0   | 0    |
| PRJNA295976 | SRR2396645  | Bombus terrestris | single end | 2015 | NA   | 2013 | NA      | NA     | 8545171  | 3   | 0    | 0   | 0    |
| PRJNA295976 | SRR2396646  | Bombus terrestris | single end | 2015 | NA   | 2013 | NA      | NA     | 9036778  | 2   | 0    | 0   | 0    |
| PRJNA295976 | SRR2396647  | Bombus terrestris | single end | 2015 | NA   | 2013 | NA      | NA     | 7146573  | 5   | 0    | 0   | 0    |
| PRJNA295976 | SRR2396648  | Bombus terrestris | single end | 2015 | NA   | 2013 | NA      | NA     | 8081346  | 0   | 0    | 0   | 0    |
| PRJNA295976 | SRR2396649  | Bombus terrestris | single end | 2015 | NA   | 2013 | NA      | NA     | 7957466  | 2   | 0    | 0   | 0    |
| PRJNA295976 | SRR2396650  | Bombus terrestris | single end | 2015 | NA   | 2013 | NA      | NA     | 6644153  | 1   | 0    | 0   | 0    |
| PRJNA295976 | SRR2396651  | Bombus terrestris | single end | 2015 | NA   | 2013 | NA      | NA     | 6821075  | 2   | 0    | 0   | 0    |
| PRJNA295976 | SRR2396652  | Bombus terrestris | single end | 2015 | NA   | 2013 | NA      | NA     | 8054617  | 0   | 0    | 0   | 0    |
| PRJNA295976 | SRR2396653  | Bombus terrestris | single end | 2015 | NA   | 2013 | NA      | NA     | 7541784  | 0   | 0    | 0   | 0    |
| PRJNA295976 | SRR2396654  | Bombus terrestris | single end | 2015 | NA   | 2013 | NA      | NA     | 7222207  | 0   | 0    | 0   | 0    |
| PRJNA295976 | SRR2396655  | Bombus terrestris | single end | 2015 | NA   | 2013 | NA      | NA     | 9257337  | 1   | 0    | 0   | 0    |
| PRJNA295976 | SRR2396656  | Bombus terrestris | single end | 2015 | NA   | 2013 | NA      | NA     | 8366303  | 8   | 0    | 0   | 0    |
| PRJNA295976 | SRR2396657  | Bombus terrestris | single end | 2015 | NA   | 2013 | NA      | NA     | 7621052  | 0   | 0    | 0   | 0    |
| PRJNA318490 | SRR3383868  | Bombus terrestris | single end | 2016 | 2015 | 2015 | Belgium | Europe | 1717200  | 578 | 0.03 | 577 | 0.03 |
| PRJNA355856 | SRR5068586  | Bombus terrestris | single end | 2020 | NA   | 2018 | NA      | NA     | 53726533 | 0   | 0    | 0   | 0    |
| PRJNA355856 | SRR5068587  | Bombus terrestris | single end | 2020 | NA   | 2018 | NA      | NA     | 44622577 | 0   | 0    | 0   | 0    |
| PRJNA355856 | SRR5068588  | Bombus terrestris | single end | 2020 | NA   | 2018 | NA      | NA     | 35535745 | 0   | 0    | 0   | 0    |
| PRJNA355856 | SRR5068589  | Bombus terrestris | single end | 2020 | NA   | 2018 | NA      | NA     | 39752246 | 0   | 0    | 0   | 0    |
| PRJNA355856 | SRR5068590  | Bombus terrestris | single end | 2020 | NA   | 2018 | NA      | NA     | 54677881 | 0   | 0    | 0   | 0    |
| PRJNA355856 | SRR5068591  | Bombus terrestris | single end | 2020 | NA   | 2018 | NA      | NA     | 43740987 | 0   | 0    | 0   | 0    |
| PRJNA355856 | SRR5068592  | Bombus terrestris | single end | 2020 | NA   | 2018 | NA      | NA     | 54674616 | 0   | 0    | 0   | 0    |
| PRJNA355856 | SRR5068593  | Bombus terrestris | single end | 2020 | NA   | 2018 | NA      | NA     | 43077403 | 0   | 0    | 0   | 0    |
| PRJNA355856 | SRR5068594  | Bombus terrestris | single end | 2020 | NA   | 2018 | NA      | NA     | 22098444 | 0   | 0    | 0   | 0    |
| PRJNA355856 | SRR5068595  | Bombus terrestris | single end | 2020 | NA   | 2018 | NA      | NA     | 67547913 | 0   | 0    | 0   | 0    |
| PRJNA355856 | SRR5068596  | Bombus terrestris | single end | 2020 | NA   | 2018 | NA      | NA     | 47648503 | 0   | 0    | 0   | 0    |
| PRJNA355856 | SRR5068597  | Bombus terrestris | single end | 2020 | NA   | 2018 | NA      | NA     | 47917967 | 0   | 0    | 0   | 0    |
| PRJNA355856 | SRR5068598  | Bombus terrestris | single end | 2020 | NA   | 2018 | NA      | NA     | 47127609 | 0   | 0    | 0   | 0    |
| PRJNA355856 | SRR5068599  | Bombus terrestris | single end | 2020 | NA   | 2018 | NA      | NA     | 48433636 | 0   | 0    | 0   | 0    |
| PRJNA355856 | SRR5068600  | Bombus terrestris | single end | 2020 | NA   | 2018 | NA      | NA     | 42868233 | 0   | 0    | 0   | 0    |
| PRJNA355856 | SRR5068601  | Bombus terrestris | single end | 2020 | NA   | 2018 | NA      | NA     | 27111079 | 1   | 0    | 0   | 0    |
| PRJNA355856 | SRR5068602  | Bombus terrestris | single end | 2020 | NA   | 2018 | NA      | NA     | 46612893 | 0   | 0    | 0   | 0    |
| PRJNA355856 | SRR5068603  | Bombus terrestris | single end | 2020 | NA   | 2018 | NA      | NA     | 37547227 | 0   | 0    | 0   | 0    |
| PRJNA355856 | SRR5068604  | Bombus terrestris | single end | 2020 | NA   | 2018 | NA      | NA     | 53461561 | 0   | 0    | 0   | 0    |
| PRJNA355856 | SRR5068605  | Bombus terrestris | single end | 2020 | NA   | 2018 | NA      | NA     | 35120784 | 0   | 0    | 0   | 0    |
| PRJNA508397 | SRR8288022  | Bombus terrestris | single end | 2019 | 2016 | 2016 | NA      | NA     | 5637792  | 0   | 0    | 0   | 0    |
| PRJNA508397 | SRR8288023  | Bombus terrestris | single end | 2019 | 2016 | 2016 | NA      | NA     | 11338978 | 0   | 0    | 0   | 0    |
| PRJNA508397 | SRR8288201  | Bombus terrestris | single end | 2019 | 2016 | 2016 | NA      | NA     | 2453469  | 0   | 0    | 0   | 0    |
| PRJNA508397 | SRR8288202  | Bombus terrestris | single end | 2019 | 2016 | 2016 | NA      | NA     | 15985465 | 0   | 0    | 0   | 0    |
| PRJNA508397 | SRR8288214  | Bombus terrestris | single end | 2019 | 2016 | 2016 | NA      | NA     | 19279113 | 0   | 0    | 0   | 0    |
| PRJNA508397 | SRR8288215  | Bombus terrestris | single end | 2019 | 2016 | 2016 | NA      | NA     | 2906939  | 0   | 0    | 0   | 0    |
| PRJNA508397 | SRR8288242  | Bombus terrestris | single end | 2019 | 2016 | 2016 | NA      | NA     | 12282977 | 0   | 0    | 0   | 0    |
| PRJNA508397 | SRR8288243  | Bombus terrestris | single end | 2019 | 2016 | 2016 | NA      | NA     | 6958906  | 0   | 0    | 0   | 0    |
| PRJNA508397 | SRR8288337  | Bombus terrestris | single end | 2019 | 2016 | 2016 | NA      | NA     | 16645209 | 0   | 0    | 0   | 0    |
| PRJNA508397 | SRR8288338  | Bombus terrestris | single end | 2019 | 2016 | 2016 | NA      | NA     | 3942153  | 0   | 0    | 0</ |      |

NCBI\_tot

|             |             |                   |            |      |      |      |                |        |           |      |    |   |   |
|-------------|-------------|-------------------|------------|------|------|------|----------------|--------|-----------|------|----|---|---|
| PRJNA508397 | SRR8289690  | Bombus terrestris | single end | 2019 | 2016 | 2016 | NA             | NA     | 11718157  | 0    | 0  | 0 | 0 |
| PRJNA508397 | SRR8289691  | Bombus terrestris | single end | 2019 | 2016 | 2016 | NA             | NA     | 16709755  | 0    | 0  | 0 | 0 |
| PRJNA508397 | SRR8289692  | Bombus terrestris | single end | 2019 | 2016 | 2016 | NA             | NA     | 5926844   | 0    | 0  | 0 | 0 |
| PRJNA508397 | SRR8289714  | Bombus terrestris | single end | 2019 | 2016 | 2016 | NA             | NA     | 17784270  | 0    | 0  | 0 | 0 |
| PRJNA508397 | SRR8289715  | Bombus terrestris | single end | 2019 | 2016 | 2016 | NA             | NA     | 1715559   | 0    | 0  | 0 | 0 |
| PRJNA508397 | SRR8290146  | Bombus terrestris | single end | 2019 | 2016 | 2016 | NA             | NA     | 10023294  | 0    | 0  | 0 | 0 |
| PRJNA508397 | SRR8290147  | Bombus terrestris | single end | 2019 | 2016 | 2016 | NA             | NA     | 11616219  | 0    | 0  | 0 | 0 |
| PRJNA508397 | SRR8290169  | Bombus terrestris | single end | 2019 | 2016 | 2016 | NA             | NA     | 16457257  | 0    | 0  | 0 | 0 |
| PRJNA508397 | SRR8290170  | Bombus terrestris | single end | 2019 | 2016 | 2016 | NA             | NA     | 3928753   | 0    | 0  | 0 | 0 |
| PRJNA508397 | SRR8290191  | Bombus terrestris | single end | 2019 | 2016 | 2016 | NA             | NA     | 6897349   | 0    | 0  | 0 | 0 |
| PRJNA508397 | SRR8290192  | Bombus terrestris | single end | 2019 | 2016 | 2016 | NA             | NA     | 10385894  | 0    | 0  | 0 | 0 |
| PRJNA508397 | SRR8291682  | Bombus terrestris | single end | 2019 | 2016 | 2016 | NA             | NA     | 9000633   | 0    | 0  | 0 | 0 |
| PRJNA508397 | SRR8291683  | Bombus terrestris | single end | 2019 | 2016 | 2016 | NA             | NA     | 7172826   | 0    | 0  | 0 | 0 |
| PRJNA508397 | SRR8291751  | Bombus terrestris | single end | 2019 | 2016 | 2016 | NA             | NA     | 10661096  | 0    | 0  | 0 | 0 |
| PRJNA508397 | SRR8291752  | Bombus terrestris | single end | 2019 | 2016 | 2016 | NA             | NA     | 5878640   | 0    | 0  | 0 | 0 |
| PRJNA508397 | SRR8291869  | Bombus terrestris | single end | 2019 | 2016 | 2016 | NA             | NA     | 6224881   | 0    | 0  | 0 | 0 |
| PRJNA508397 | SRR8291870  | Bombus terrestris | single end | 2019 | 2016 | 2016 | NA             | NA     | 14370377  | 0    | 0  | 0 | 0 |
| PRJNA508397 | SRR8291892  | Bombus terrestris | single end | 2019 | 2016 | 2016 | NA             | NA     | 10494196  | 0    | 0  | 0 | 0 |
| PRJNA508397 | SRR8291893  | Bombus terrestris | single end | 2019 | 2016 | 2016 | NA             | NA     | 6791730   | 0    | 0  | 0 | 0 |
| PRJNA508397 | SRR8292121  | Bombus terrestris | single end | 2019 | 2016 | 2016 | NA             | NA     | 1941692   | 0    | 0  | 0 | 0 |
| PRJNA508397 | SRR8292122  | Bombus terrestris | single end | 2019 | 2016 | 2016 | NA             | NA     | 16364665  | 0    | 0  | 0 | 0 |
| PRJNA508397 | SRR8292125  | Bombus terrestris | single end | 2019 | 2016 | 2016 | NA             | NA     | 8391529   | 0    | 0  | 0 | 0 |
| PRJNA508397 | SRR8292126  | Bombus terrestris | single end | 2019 | 2016 | 2016 | NA             | NA     | 1456693   | 0    | 0  | 0 | 0 |
| PRJNA508397 | SRR8292128  | Bombus terrestris | single end | 2019 | 2016 | 2016 | NA             | NA     | 7206200   | 0    | 0  | 0 | 0 |
| PRJNA508397 | SRR8292129  | Bombus terrestris | single end | 2019 | 2016 | 2016 | NA             | NA     | 12183898  | 0    | 0  | 0 | 0 |
| PRJNA508397 | SRR8292135  | Bombus terrestris | single end | 2019 | 2016 | 2016 | NA             | NA     | 4448714   | 0    | 0  | 0 | 0 |
| PRJNA508397 | SRR8292136  | Bombus terrestris | single end | 2019 | 2016 | 2016 | NA             | NA     | 13659362  | 0    | 0  | 0 | 0 |
| PRJNA508397 | SRR8292162  | Bombus terrestris | single end | 2019 | 2016 | 2016 | NA             | NA     | 3422837   | 0    | 0  | 0 | 0 |
| PRJNA508397 | SRR8292163  | Bombus terrestris | single end | 2019 | 2016 | 2016 | NA             | NA     | 12367542  | 0    | 0  | 0 | 0 |
| PRJNA508397 | SRR8292230  | Bombus terrestris | single end | 2019 | 2016 | 2016 | NA             | NA     | 7088102   | 0    | 0  | 0 | 0 |
| PRJNA508397 | SRR8292231  | Bombus terrestris | single end | 2019 | 2016 | 2016 | NA             | NA     | 9414732   | 0    | 0  | 0 | 0 |
| PRJNA508397 | SRR8292237  | Bombus terrestris | single end | 2019 | 2016 | 2016 | NA             | NA     | 4253744   | 0    | 0  | 0 | 0 |
| PRJNA508397 | SRR8292238  | Bombus terrestris | single end | 2019 | 2016 | 2016 | NA             | NA     | 10371671  | 0    | 0  | 0 | 0 |
| PRJNA533306 | SRR8929852  | Bombus terrestris | single end | 2019 | 2016 | 2016 | Belgium        | Europe | 2699327   | 0    | 0  | 0 | 0 |
| PRJDB6538   | DRR152981   | Bombus terrestris | paired end | 2018 | NA   | 2016 | NA             | NA     | 22982038  | 0    | 0  | 0 | 0 |
| PRJDB6538   | DRR152982   | Bombus terrestris | paired end | 2018 | NA   | 2016 | NA             | NA     | 14913126  | 0    | 0  | 0 | 0 |
| PRJDB6538   | DRR152983   | Bombus terrestris | paired end | 2018 | NA   | 2016 | NA             | NA     | 13682372  | 0    | 0  | 0 | 0 |
| PRJDB6538   | DRR152984   | Bombus terrestris | paired end | 2018 | NA   | 2016 | NA             | NA     | 34202834  | 0    | 0  | 0 | 0 |
| PRJDB6538   | DRR152985   | Bombus terrestris | paired end | 2018 | NA   | 2016 | NA             | NA     | 32248374  | 0    | 0  | 0 | 0 |
| PRJDB6538   | DRR152986   | Bombus terrestris | paired end | 2018 | NA   | 2016 | NA             | NA     | 30226176  | 0    | 0  | 0 | 0 |
| PRJDB6538   | DRR152987   | Bombus terrestris | paired end | 2018 | NA   | 2016 | NA             | NA     | 22630006  | 0    | 0  | 0 | 0 |
| PRJDB6538   | DRR152988   | Bombus terrestris | paired end | 2018 | NA   | 2016 | NA             | NA     | 22341088  | 0    | 0  | 0 | 0 |
| PRJDB6538   | DRR152989   | Bombus terrestris | paired end | 2018 | NA   | 2016 | NA             | NA     | 21438236  | 0    | 0  | 0 | 0 |
| PRJDB6538   | DRR152990   | Bombus terrestris | paired end | 2018 | NA   | 2016 | NA             | NA     | 38534344  | 0    | 0  | 0 | 0 |
| PRJEB45168  | ERR6363272  | Bombus terrestris | paired end | 2021 | 2020 | 2020 | United Kingdom | Europe | 50715972  | 0    | 0  | 0 | 0 |
| PRJNA615177 | SRR11445089 | Bombus terrestris | paired end | 2021 | 2004 | 2004 | United Kingdom | Europe | 112347920 | 0    | 0  | 0 | 0 |
| PRJNA615177 | SRR11445090 | Bombus terrestris | paired end | 2021 | 2004 | 2004 | United Kingdom | Europe | 100783008 | 0    | 0  | 0 | 0 |
| PRJNA615177 | SRR11445091 | Bombus terrestris | paired end | 2021 | 2004 | 2004 | United Kingdom | Europe | 99546426  | 0    | 0  | 0 | 0 |
| PRJNA615177 | SRR11448239 | Bombus terrestris | paired end | 2021 | 2004 | 2004 | United Kingdom | Europe | 103211992 | 0    | 0  | 0 | 0 |
| PRJNA615177 | SRR11448240 | Bombus terrestris | paired end | 2021 | 2004 | 2004 | United Kingdom | Europe | 97723116  | 0    | 0  | 0 | 0 |
| PRJNA615177 | SRR11448241 | Bombus terrestris | paired end | 2021 | 2004 | 2004 | United Kingdom | Europe | 97207226  | 0    | 0  | 0 | 0 |
| PRJNA238307 | SRR1169734  | Bombus terrestris | paired end | 2015 | NA   | 2013 | NA             | NA     | 12312556  | 0    | 0  | 0 | 0 |
| PRJNA238307 | SRR1169735  | Bombus terrestris | paired end | 2015 | NA   | 2013 | NA             | NA     | 13107886  | 0    | 0  | 0 | 0 |
| PRJNA238307 | SRR1169736  | Bombus terrestris | paired end | 2015 | NA   | 2013 | NA             | NA     | 12632346  | 0    | 0  | 0 | 0 |
| PRJNA238307 | SRR1169737  | Bombus terrestris | paired end | 2015 | NA   | 2013 | NA             | NA     | 12610988  | 0    | 0  | 0 | 0 |
| PRJNA238307 | SRR1169738  | Bombus terrestris | paired end | 2015 | NA   | 2013 | NA             | NA     | 13277232  | 0    | 0  | 0 | 0 |
| PRJNA238307 | SRR1169739  | Bombus terrestris | paired end | 2015 | NA   | 2013 | NA             | NA     | 12685250  | 0    | 0  | 0 | 0 |
| PRJNA238307 | SRR1169740  | Bombus terrestris | paired end | 2015 | NA   | 2013 | NA             | NA     | 12642718  | 0    | 0  | 0 | 0 |
| PRJNA238307 | SRR1169741  | Bombus terrestris | paired end | 2015 | NA   | 2013 | NA             | NA     | 13153178  | 0    | 0  | 0 | 0 |
| PRJNA238307 | SRR1169742  | Bombus terrestris | paired end | 2015 | NA   | 2013 | NA             | NA     | 13229900  | 0    | 0  | 0 | 0 |
| PRJNA238307 | SRR1169743  | Bombus terrestris | paired end | 2015 | NA   | 2013 | NA             | NA     | 12370652  | 0    | 0  | 0 | 0 |
| PRJNA238307 | SRR1169744  | Bombus terrestris | paired end | 2015 | NA   | 2013 | NA             | NA     | 12839842  | 0    | 0  | 0 | 0 |
| PRJNA238307 | SRR1169745  | Bombus terrestris | paired end | 2015 | NA   | 2013 | NA             | NA     | 12663482  | 0    | 0  | 0 | 0 |
| PRJNA238307 | SRR1169746  | Bombus terrestris | paired end | 2015 | NA   | 2013 | NA             | NA     | 12990764  | 0    | 0  | 0 | 0 |
| PRJNA238307 | SRR1169747  | Bombus terrestris | paired end | 2015 | NA   | 2013 | NA             | NA     | 12603724  | 0    | 0  | 0 | 0 |
| PRJNA238307 | SRR1169748  | Bombus terrestris | paired end | 2015 | NA   | 2013 | NA             | NA     | 12750240  | 0    | 0  | 0 | 0 |
| PRJNA238307 | SRR1169749  | Bombus terrestris | paired end | 2015 | NA   | 2013 | NA             | NA     | 12411698  | 0    | 0  | 0 | 0 |
| PRJNA636805 | SRR11943140 | Bombus terrestris | paired end | 2020 | 2018 | 2018 | Germany        | Europe | 184151966 | 0    | 12 | 0 | 0 |
| PRJNA637188 | SRR12587876 | Bombus terrestris | paired end | 2021 | NA   | 2019 | NA             | NA     | 117397290 | 0    | 0  | 0 | 0 |
| PRJNA637188 | SRR12587877 | Bombus terrestris | paired end | 2021 | NA   | 2019 | NA             | NA     | 64538324  | 0    | 0  | 0 | 0 |
| PRJNA704259 | SRR13769018 | Bombus terrestris | paired end | 2021 | 2009 | 2009 | United Kingdom | Europe | 74846232  | 0    | 0  | 0 | 0 |
| PRJNA704259 | SRR13769019 | Bombus terrestris | paired end | 2021 | 2009 | 2009 | United Kingdom | Europe | 92831608  | 0    | 0  | 0 | 0 |
| PRJNA779160 | SRR16931588 | Bombus terrestris | paired end | 2021 | 2020 | 2020 | China          | Asia   | 46928336  | 36   | 0  | 0 | 0 |
| PRJNA779160 | SRR16931589 | Bombus terrestris | paired end | 2021 | 2020 | 2020 | China          | Asia   | 46400154  | 79   | 0  | 0 | 0 |
| PRJNA779160 | SRR16931590 | Bombus terrestris | paired end | 2021 | 2020 | 2020 | China          | Asia   | 50930234  | 80   | 0  | 0 | 0 |
| PRJNA779160 | SRR16931591 | Bombus terrestris | paired end | 2021 | 2020 | 2020 | China          | Asia   | 50112682  | 152  | 0  | 0 | 0 |
| PRJNA779160 | SRR16931592 | Bombus terrestris | paired end | 2021 | 2020 | 2020 | China          | Asia   | 55362860  | 638  | 0  | 0 | 0 |
| PRJNA779160 | SRR16931593 | Bombus terrestris | paired end | 2021 | 2020 | 2020 | China          | Asia   | 62248100  | 1386 | 0  | 0 | 0 |
| PRJNA328517 | SRR3879945  | Bombus terrestris | paired end | 2016 | 2012 | 2012 | Switzerland    | Europe | 13523412  | 0    | 0  | 0 | 0 |
| PRJNA328517 | SRR3879947  | Bombus terrestris | paired end | 2016 | 2012 | 2012 | Switzerland    | Europe | 13860004  | 0    | 0  | 0 | 0 |
| PRJNA328517 | SRR3879950  | Bombus terrestris | paired end | 2016 | 2012 | 2012 | Switzerland    | Europe | 12829240  | 0    | 0  | 0 | 0 |
| PRJNA328517 | SRR3879952  | Bombus terrestris | paired end | 2016 | 2012 | 2012 | Switzerland    | Europe | 13567618  | 0    | 0  | 0 | 0 |
| PRJNA328517 | SRR3879954  | Bombus terrestris | paired end | 2016 | 2012 | 2012 | Switzerland    | Europe | 13536596  | 0    | 0  | 0 | 0 |
| PRJNA328517 | SRR3879956  | Bombus terrestris | paired end | 2016 | 2012 | 2012 | Switzerland    | Europe | 13542410  | 0    | 0  | 0 | 0 |
| PRJNA328517 | SRR3879958  | Bombus terrestris | paired end | 2016 | 2012 | 2012 | Switzerland    | Europe | 13256560  | 0    | 0  | 0 | 0 |
| PRJNA328517 | SRR3879960  | Bombus terrestris | paired end | 2016 | 2012 | 2012 | Switzerland    | Europe | 13520526  | 0    | 0  | 0 | 0 |
| PRJNA328517 | SRR3879962  | Bombus terrestris | paired end | 2016 | 2012 | 2012 | Switzerland    | Europe | 12941528  | 0    | 0  | 0 | 0 |
| PRJNA358479 | SRR5125102  | Bombus terrestris | paired end | 2017 | NA   | 2015 | NA             | NA     | 47019680  | 0    | 0  | 0 | 0 |
| PRJNA358479 | SRR5125103  | Bombus terrestris | paired end | 2017 | NA   | 2015 | NA             | NA     | 49501766  | 0    | 0  | 0 | 0 |
| PRJNA358479 | SRR5125104  | Bombus terrestris | paired end | 2017 | NA   | 2015 | NA             | NA     | 54975072  | 0    | 0  | 0 | 0 |
| PRJNA358479 | SRR5125105  | Bombus terrestris | paired end | 2017 | NA   | 2015 | NA             | NA     | 50117162  | 0    | 0  | 0 | 0 |
| PRJNA358479 | SRR5125106  | Bombus terrestris | paired end | 2017 | NA   | 2015 | NA             | NA     | 53179288  | 0    | 0  | 0 | 0 |
| PRJNA358479 | SRR5125107  | Bombus terrestris | paired end | 2017 | NA   | 2015 | NA             | NA     | 48482052  | 0    | 0  | 0 | 0 |
| PRJNA358479 | SRR5125108  | Bombus terrestris | paired end | 2017 | NA   | 2015 | NA             | NA     | 56013116  | 0    | 0  | 0 | 0 |
| PRJNA358479 | SRR5125109  | Bombus terrestris | paired end | 2017 | NA   | 2015 | NA             | NA     | 65410272  | 0    | 0  | 0 | 0 |
| PRJNA358479 | SRR5125110  | Bombus terrestris | paired end | 2017 | NA   | 2015 | NA             | NA     | 61104222  | 0    | 0  | 0 | 0 |
| PRJNA358479 | SRR5125111  | Bombus terrestris | paired end | 2017 | NA   | 2015 | NA             | NA     | 55263298  | 0    | 0  | 0 | 0 |
| PRJNA358479 | SRR5125112  | Bombus terrestris | paired end | 2017 | NA   | 2015 | NA             | NA     | 59601460  | 0    | 0  | 0 | 0 |
| PRJNA358479 | SRR5125113  | Bombus terrestris | paired end | 2017 | NA   | 2015 | NA             | NA     | 45703860  | 0    | 0  | 0 | 0 |
| PRJNA358479 | SRR5125114  | Bombus terrestris |            |      |      |      |                |        |           |      |    |   |   |

|             |            |                   |            |      |      |      |                |        |          |      |      |      |   |
|-------------|------------|-------------------|------------|------|------|------|----------------|--------|----------|------|------|------|---|
| PRJNA358479 | SRR5125121 | Bombus terrestris | paired end | 2017 | NA   | 2015 | NA             | NA     | 53081034 | 0    | 0    | 0    | 0 |
| PRJNA358479 | SRR5125122 | Bombus terrestris | paired end | 2017 | NA   | 2015 | NA             | NA     | 46953490 | 0    | 0    | 0    | 0 |
| PRJNA358479 | SRR5125123 | Bombus terrestris | paired end | 2017 | NA   | 2015 | NA             | NA     | 50370060 | 0    | 0    | 0    | 0 |
| PRJNA358479 | SRR5125124 | Bombus terrestris | paired end | 2017 | NA   | 2015 | NA             | NA     | 59129662 | 0    | 0    | 0    | 0 |
| PRJNA358479 | SRR5125125 | Bombus terrestris | paired end | 2017 | NA   | 2015 | NA             | NA     | 55749468 | 0    | 0    | 0    | 0 |
| PRJNA358479 | SRR5125126 | Bombus terrestris | paired end | 2017 | NA   | 2015 | NA             | NA     | 57860990 | 0    | 0    | 0    | 0 |
| PRJNA358479 | SRR5125127 | Bombus terrestris | paired end | 2017 | NA   | 2015 | NA             | NA     | 53607412 | 0    | 0    | 0    | 0 |
| PRJNA358479 | SRR5125128 | Bombus terrestris | paired end | 2017 | NA   | 2015 | NA             | NA     | 49923908 | 0    | 0    | 0    | 0 |
| PRJNA358479 | SRR5125129 | Bombus terrestris | paired end | 2017 | NA   | 2015 | NA             | NA     | 53394062 | 0    | 0    | 0    | 0 |
| PRJNA358479 | SRR5125130 | Bombus terrestris | paired end | 2017 | NA   | 2015 | NA             | NA     | 57439134 | 0    | 0    | 0    | 0 |
| PRJNA358479 | SRR5125131 | Bombus terrestris | paired end | 2017 | NA   | 2015 | NA             | NA     | 60548752 | 0    | 0    | 0    | 0 |
| PRJNA358479 | SRR5125132 | Bombus terrestris | paired end | 2017 | NA   | 2015 | NA             | NA     | 51650938 | 0    | 0    | 0    | 0 |
| PRJNA358479 | SRR5125133 | Bombus terrestris | paired end | 2017 | NA   | 2015 | NA             | NA     | 52118076 | 0    | 0    | 0    | 0 |
| PRJNA358479 | SRR5125134 | Bombus terrestris | paired end | 2017 | NA   | 2015 | NA             | NA     | 47491950 | 0    | 0    | 0    | 0 |
| PRJNA368859 | SRR5614374 | Bombus terrestris | paired end | 2017 | 2016 | 2016 | United Kingdom | Europe | 21701860 | 0    | 0    | 0    | 0 |
| PRJNA368859 | SRR5614375 | Bombus terrestris | paired end | 2017 | 2016 | 2016 | United Kingdom | Europe | 17464500 | 0    | 0    | 0    | 0 |
| PRJNA368859 | SRR5614825 | Bombus terrestris | paired end | 2017 | 2016 | 2016 | United Kingdom | Europe | 39639922 | 0    | 0    | 0    | 0 |
| PRJNA368859 | SRR5614826 | Bombus terrestris | paired end | 2017 | 2016 | 2016 | United Kingdom | Europe | 66335852 | 0    | 0    | 0    | 0 |
| PRJNA368859 | SRR5614828 | Bombus terrestris | paired end | 2017 | 2016 | 2016 | United Kingdom | Europe | 57089018 | 0    | 0    | 0    | 0 |
| PRJNA391408 | SRR5739351 | Bombus terrestris | paired end | 2017 | 2012 | 2012 | NA             | NA     | 86381322 | 0    | 0    | 0    | 0 |
| PRJNA411946 | SRR6148368 | Bombus terrestris | paired end | 2018 | 2015 | 2015 | Belgium        | Europe | 30991226 | 2    | 0    | 2    | 0 |
| PRJNA411946 | SRR6148370 | Bombus terrestris | paired end | 2018 | 2015 | 2015 | Belgium        | Europe | 30343908 | 0    | 0    | 50   | 0 |
| PRJNA411946 | SRR6148374 | Bombus terrestris | paired end | 2018 | 2015 | 2015 | Belgium        | Europe | 31094888 | 0    | 0    | 0    | 0 |
| PRJNA497863 | SRR8085426 | Bombus terrestris | paired end | 2019 | 2012 | 2012 | Israel         | Asia   | 69708528 | 630  | 0    | 108  | 0 |
| PRJNA497863 | SRR8085427 | Bombus terrestris | paired end | 2019 | 2012 | 2012 | Israel         | Asia   | 62695770 | 249  | 0    | 33   | 0 |
| PRJNA497863 | SRR8085428 | Bombus terrestris | paired end | 2019 | 2012 | 2012 | Israel         | Asia   | 64750316 | 152  | 0    | 28   | 0 |
| PRJNA497863 | SRR8085429 | Bombus terrestris | paired end | 2019 | 2012 | 2012 | Israel         | Asia   | 88891280 | 258  | 0    | 34   | 0 |
| PRJNA497863 | SRR8085430 | Bombus terrestris | paired end | 2019 | 2012 | 2012 | Israel         | Asia   | 71710530 | 104  | 0    | 15   | 0 |
| PRJNA497863 | SRR8085431 | Bombus terrestris | paired end | 2019 | 2012 | 2012 | Israel         | Asia   | 56814368 | 0    | 0    | 1    | 0 |
| PRJNA497863 | SRR8085432 | Bombus terrestris | paired end | 2019 | 2012 | 2012 | Israel         | Asia   | 68615816 | 4    | 0    | 4    | 0 |
| PRJNA497863 | SRR8085433 | Bombus terrestris | paired end | 2019 | 2012 | 2012 | Israel         | Asia   | 72861098 | 154  | 0    | 12   | 0 |
| PRJNA497863 | SRR8085434 | Bombus terrestris | paired end | 2019 | 2012 | 2012 | Israel         | Asia   | 64089978 | 8    | 0    | 2    | 0 |
| PRJNA497863 | SRR8085435 | Bombus terrestris | paired end | 2019 | 2012 | 2012 | Israel         | Asia   | 65988758 | 140  | 0    | 24   | 0 |
| PRJNA497863 | SRR8085436 | Bombus terrestris | paired end | 2019 | 2012 | 2012 | Israel         | Asia   | 69733244 | 40   | 0    | 9    | 0 |
| PRJNA497863 | SRR8085437 | Bombus terrestris | paired end | 2019 | 2012 | 2012 | Israel         | Asia   | 66538798 | 10   | 0    | 0    | 0 |
| PRJNA497863 | SRR8085438 | Bombus terrestris | paired end | 2019 | 2012 | 2012 | Israel         | Asia   | 69394740 | 94   | 0    | 13   | 0 |
| PRJNA497863 | SRR8085439 | Bombus terrestris | paired end | 2019 | 2012 | 2012 | Israel         | Asia   | 70771096 | 144  | 0    | 38   | 0 |
| PRJNA497863 | SRR8085440 | Bombus terrestris | paired end | 2019 | 2012 | 2012 | Israel         | Asia   | 76684616 | 1333 | 0    | 229  | 0 |
| PRJNA497863 | SRR8085441 | Bombus terrestris | paired end | 2019 | 2012 | 2012 | Israel         | Asia   | 64789228 | 206  | 0    | 57   | 0 |
| PRJNA497863 | SRR8085442 | Bombus terrestris | paired end | 2019 | 2012 | 2012 | Israel         | Asia   | 68917264 | 213  | 0    | 26   | 0 |
| PRJNA497863 | SRR8085443 | Bombus terrestris | paired end | 2019 | 2012 | 2012 | Israel         | Asia   | 82007530 | 420  | 0    | 54   | 0 |
| PRJNA497863 | SRR8085444 | Bombus terrestris | paired end | 2019 | 2012 | 2012 | Israel         | Asia   | 65172014 | 3    | 0    | 0    | 0 |
| PRJNA497863 | SRR8085445 | Bombus terrestris | paired end | 2019 | 2012 | 2012 | Israel         | Asia   | 70713174 | 44   | 0    | 9    | 0 |
| PRJNA497863 | SRR8085446 | Bombus terrestris | paired end | 2019 | 2012 | 2012 | Israel         | Asia   | 70305610 | 52   | 0    | 10   | 0 |
| PRJNA497863 | SRR8085447 | Bombus terrestris | paired end | 2019 | 2012 | 2012 | Israel         | Asia   | 62854238 | 821  | 0    | 97   | 0 |
| PRJNA497863 | SRR8085448 | Bombus terrestris | paired end | 2019 | 2012 | 2012 | Israel         | Asia   | 74894848 | 665  | 0    | 110  | 0 |
| PRJNA497863 | SRR8085449 | Bombus terrestris | paired end | 2019 | 2012 | 2012 | Israel         | Asia   | 75627238 | 103  | 0    | 14   | 0 |
| PRJNA497863 | SRR8085450 | Bombus terrestris | paired end | 2019 | 2012 | 2012 | Israel         | Asia   | 70843306 | 231  | 0    | 48   | 0 |
| PRJNA497863 | SRR8085451 | Bombus terrestris | paired end | 2019 | 2012 | 2012 | Israel         | Asia   | 67983610 | 428  | 0    | 71   | 0 |
| PRJNA497863 | SRR8085452 | Bombus terrestris | paired end | 2019 | 2012 | 2012 | Israel         | Asia   | 72462156 | 80   | 0    | 31   | 0 |
| PRJNA497863 | SRR8085453 | Bombus terrestris | paired end | 2019 | 2012 | 2012 | Israel         | Asia   | 68567196 | 9407 | 0.01 | 2127 | 0 |
| PRJNA497863 | SRR8085454 | Bombus terrestris | paired end | 2019 | 2012 | 2012 | Israel         | Asia   | 65870484 | 1493 | 0    | 352  | 0 |
| PRJNA497863 | SRR8085455 | Bombus terrestris | paired end | 2019 | 2012 | 2012 | Israel         | Asia   | 62564618 | 4352 | 0.01 | 891  | 0 |
| PRJNA497863 | SRR8085459 | Bombus terrestris | paired end | 2019 | 2012 | 2012 | Israel         | Asia   | 69164392 | 225  | 0    | 28   | 0 |
| PRJNA497863 | SRR8085460 | Bombus terrestris | paired end | 2019 | 2012 | 2012 | Israel         | Asia   | 69181190 | 1057 | 0    | 234  | 0 |
| PRJNA497863 | SRR8085461 | Bombus terrestris | paired end | 2019 | 2012 | 2012 | Israel         | Asia   | 60032064 | 466  | 0    | 89   | 0 |
| PRJNA497863 | SRR8085462 | Bombus terrestris | paired end | 2019 | 2012 | 2012 | Israel         | Asia   | 58444844 | 332  | 0    | 51   | 0 |
| PRJNA497863 | SRR8085463 | Bombus terrestris | paired end | 2019 | 2012 | 2012 | Israel         | Asia   | 63689854 | 324  | 0    | 56   | 0 |
| PRJNA497863 | SRR8085464 | Bombus terrestris | paired end | 2019 | 2012 | 2012 | Israel         | Asia   | 62224930 | 896  | 0    | 169  | 0 |
| PRJNA497863 | SRR8085465 | Bombus terrestris | paired end | 2019 | 2012 | 2012 | Israel         | Asia   | 63516008 | 474  | 0    | 123  | 0 |
| PRJNA497863 | SRR8085466 | Bombus terrestris | paired end | 2019 | 2012 | 2012 | Israel         | Asia   | 71413910 | 1317 | 0    | 202  | 0 |
| PRJNA497863 | SRR8085467 | Bombus terrestris | paired end | 2019 | 2012 | 2012 | Israel         | Asia   | 71435684 | 982  | 0    | 148  | 0 |
| PRJNA497863 | SRR8085468 | Bombus terrestris | paired end | 2019 | 2012 | 2012 | Israel         | Asia   | 85975636 | 2    | 0    | 0    | 0 |
| PRJNA497863 | SRR8085469 | Bombus terrestris | paired end | 2019 | 2012 | 2012 | Israel         | Asia   | 65536234 | 1637 | 0    | 286  | 0 |
| PRJNA497863 | SRR8085470 | Bombus terrestris | paired end | 2019 | 2012 | 2012 | Israel         | Asia   | 70589158 | 364  | 0    | 59   | 0 |
| PRJNA497863 | SRR8085471 | Bombus terrestris | paired end | 2019 | 2012 | 2012 | Israel         | Asia   | 61697640 | 1474 | 0    | 312  | 0 |
| PRJNA497863 | SRR8085473 | Bombus terrestris | paired end | 2019 | 2012 | 2012 | Israel         | Asia   | 49158730 | 1949 | 0    | 318  | 0 |
| PRJNA497863 | SRR8085474 | Bombus terrestris | paired end | 2019 | 2012 | 2012 | Israel         | Asia   | 67227952 | 2423 | 0    | 403  | 0 |
| PRJNA497863 | SRR8085475 | Bombus terrestris | paired end | 2019 | 2012 | 2012 | Israel         | Asia   | 66110664 | 1711 | 0    | 400  | 0 |
| PRJNA497863 | SRR8085476 | Bombus terrestris | paired end | 2019 | 2012 | 2012 | Israel         | Asia   | 71173444 | 2145 | 0    | 469  | 0 |
| PRJNA497863 | SRR8085477 | Bombus terrestris | paired end | 2019 | 2012 | 2012 | Israel         | Asia   | 62938736 | 275  | 0    | 45   | 0 |
| PRJNA497863 | SRR8085478 | Bombus terrestris | paired end | 2019 | 2012 | 2012 | Israel         | Asia   | 69597230 | 390  | 0    | 61   | 0 |
| PRJNA497863 | SRR8085479 | Bombus terrestris | paired end | 2019 | 2012 | 2012 | Israel         | Asia   | 70654764 | 1064 | 0    | 167  | 0 |
| PRJNA497863 | SRR8085480 | Bombus terrestris | paired end | 2019 | 2012 | 2012 | Israel         | Asia   | 66894892 | 536  | 0    | 55   | 0 |
| PRJNA497863 | SRR8085481 | Bombus terrestris | paired end | 2019 | 2012 | 2012 | Israel         | Asia   | 64673342 | 236  | 0    | 47   | 0 |
| PRJNA497863 | SRR8085482 | Bombus terrestris | paired end | 2019 | 2012 | 2012 | Israel         | Asia   | 68801416 | 276  | 0    | 47   | 0 |
| PRJNA497863 | SRR8085483 | Bombus terrestris | paired end | 2019 | 2012 | 2012 | Israel         | Asia   | 62078710 | 4098 | 0.01 | 943  | 0 |
| PRJNA497863 | SRR8085484 | Bombus terrestris | paired end | 2019 | 2012 | 2012 | Israel         | Asia   | 69737588 | 1436 | 0    | 237  | 0 |
| PRJNA497863 | SRR8085485 | Bombus terrestris | paired end | 2019 | 2012 | 2012 | Israel         | Asia   | 67190268 | 126  | 0    | 51   | 0 |
| PRJNA497863 | SRR8085486 | Bombus terrestris | paired end | 2019 | 2012 | 2012 | Israel         | Asia   | 70683146 | 219  | 0    | 34   | 0 |
| PRJNA497863 | SRR8330353 | Bombus terrestris | paired end | 2019 | 2012 | 2012 | Israel         | Asia   | 62855654 | 102  | 0    | 22   | 0 |
| PRJNA533306 | SRR8929838 | Bombus terrestris | paired end | 2019 | 2016 | 2016 | Belgium        | Europe | 25702148 | 0    | 0    | 2    | 0 |
| PRJNA533306 | SRR8929839 | Bombus terrestris | paired end | 2019 | 2016 | 2016 | Belgium        | Europe | 25681830 | 0    | 0    | 0    | 0 |
| PRJNA533306 | SRR8929840 | Bombus terrestris | paired end | 2019 | 2016 | 2016 | Belgium        | Europe | 25642320 | 0    | 0    | 0    | 0 |
| PRJNA533306 | SRR8929841 | Bombus terrestris | paired end | 2019 | 2016 | 2016 | Belgium        | Europe | 21529528 | 0    | 0    | 0    | 0 |
| PRJNA533306 | SRR8929842 | Bombus terrestris | paired end | 2019 | 2016 | 2016 | Belgium        | Europe | 22985932 | 0    | 0    | 0    | 0 |
| PRJNA533306 | SRR8929843 | Bombus terrestris | paired end | 2019 | 2016 | 2016 | Belgium        | Europe | 25626120 | 0    | 0    | 0    | 0 |
| PRJNA533306 | SRR8929848 | Bombus terrestris | paired end | 2019 | 2016 | 2016 | Belgium        | Europe | 25163446 | 0    | 0    | 0    | 0 |
| PRJNA533306 | SRR8929849 | Bombus terrestris | paired end | 2019 | 2016 | 2016 | Belgium        | Europe | 21613036 | 0    | 0    | 0    | 0 |
| PRJNA533306 | SRR8929852 | Bombus terrestris | paired end | 2019 | 2016 | 2016 | Belgium        | Europe | 20257476 | 0    | 0    | 0    | 0 |
| PRJNA533306 | SRR8929853 | Bombus terrestris | paired end | 2019 | 2016 | 2016 | Belgium        | Europe | 23669718 | 0    | 0    | 0    | 0 |
| PRJNA533306 | SRR8929854 | Bombus terrestris | paired end | 2019 | 2016 | 2016 | Belgium        | Europe | 23591134 | 0    | 0    | 0    | 0 |
| PRJNA533306 | SRR8929855 | Bombus terrestris | paired end | 2019 | 2016 | 2016 | Belgium        | Europe | 21342128 | 0    | 0    | 0    | 0 |
| PRJNA533306 | SRR8929856 | Bombus terrestris | paired end | 2019 | 2016 | 2016 | Belgium        | Europe | 21633444 | 0    | 0    | 0    | 0 |
| PRJNA533306 | SRR8929857 | Bombus terrestris | paired end | 2019 | 2016 | 2016 | Belgium        | Europe | 23595028 | 0    | 0    | 0    | 0 |
| PRJNA533306 | SRR8929858 | Bombus terrestris | paired end | 2019 | 2016 | 2016 | Belgium        | Europe | 21539078 | 0    | 0    | 0    | 0 |
| PRJNA533306 | SRR8929859 | Bombus terrestris | paired end | 2019 | 2016 | 2016 | Belgium        | Europe | 21500360 | 0    | 0    | 0    | 0 |
| PRJNA533    |            |                   |            |      |      |      |                |        |          |      |      |      |   |



|             |             |                   |            |      |      |      |                |        |           |          |       |          |       |
|-------------|-------------|-------------------|------------|------|------|------|----------------|--------|-----------|----------|-------|----------|-------|
| PRJNA533942 | SRR8935776  | Bombus terrestris | paired end | 2020 | 2012 | 2012 | NA             | NA     | 27951178  | 0        | 0     | 0        | 0     |
| PRJNA533942 | SRR8935807  | Bombus terrestris | paired end | 2020 | 2012 | 2012 | NA             | NA     | 31174982  | 0        | 0     | 0        | 0     |
| PRJNA533942 | SRR8935808  | Bombus terrestris | paired end | 2020 | 2012 | 2012 | NA             | NA     | 34881406  | 0        | 0     | 0        | 0     |
| PRJNA533942 | SRR8935840  | Bombus terrestris | paired end | 2020 | 2012 | 2012 | NA             | NA     | 31826642  | 0        | 0     | 0        | 0     |
| PRJNA533942 | SRR8935842  | Bombus terrestris | paired end | 2020 | 2012 | 2012 | NA             | NA     | 23416436  | 0        | 0     | 0        | 0     |
| PRJNA533942 | SRR8935859  | Bombus terrestris | paired end | 2020 | 2012 | 2012 | NA             | NA     | 29622448  | 0        | 0     | 0        | 0     |
| PRJNA533942 | SRR8935860  | Bombus terrestris | paired end | 2020 | 2012 | 2012 | NA             | NA     | 22624544  | 0        | 0     | 0        | 0     |
| PRJNA533942 | SRR8936095  | Bombus terrestris | paired end | 2020 | 2012 | 2012 | NA             | NA     | 24036230  | 0        | 0     | 0        | 0     |
| PRJNA533942 | SRR8936109  | Bombus terrestris | paired end | 2020 | 2012 | 2012 | NA             | NA     | 21708414  | 0        | 0     | 0        | 0     |
| PRJNA533942 | SRR8936121  | Bombus terrestris | paired end | 2020 | 2012 | 2012 | NA             | NA     | 16071782  | 0        | 0     | 0        | 0     |
| PRJNA533942 | SRR8936123  | Bombus terrestris | paired end | 2020 | 2012 | 2012 | NA             | NA     | 26617866  | 0        | 0     | 0        | 0     |
| PRJNA533942 | SRR8936139  | Bombus terrestris | paired end | 2020 | 2012 | 2012 | NA             | NA     | 21274674  | 0        | 0     | 0        | 0     |
| PRJNA533942 | SRR8936181  | Bombus terrestris | paired end | 2020 | 2012 | 2012 | NA             | NA     | 32374524  | 0        | 0     | 0        | 0     |
| PRJNA524132 | SRR8946237  | Bombus terrestris | paired end | 2020 | 2016 | 2016 | United Kingdom | Europe | 21667094  | 0        | 0     | 0        | 0     |
| PRJNA524132 | SRR8946238  | Bombus terrestris | paired end | 2020 | 2016 | 2016 | United Kingdom | Europe | 21622814  | 0        | 0     | 0        | 0     |
| PRJNA524132 | SRR8946239  | Bombus terrestris | paired end | 2020 | 2016 | 2016 | United Kingdom | Europe | 21799674  | 0        | 0     | 0        | 0     |
| PRJNA524132 | SRR8946240  | Bombus terrestris | paired end | 2020 | 2016 | 2016 | United Kingdom | Europe | 21901988  | 0        | 0     | 0        | 0     |
| PRJNA524132 | SRR8946247  | Bombus terrestris | paired end | 2020 | 2016 | 2016 | United Kingdom | Europe | 21765318  | 0        | 0     | 0        | 0     |
| PRJNA524132 | SRR8946248  | Bombus terrestris | paired end | 2020 | 2016 | 2016 | United Kingdom | Europe | 21714428  | 0        | 0     | 0        | 0     |
| PRJNA524132 | SRR8946249  | Bombus terrestris | paired end | 2020 | 2016 | 2016 | United Kingdom | Europe | 21845528  | 0        | 0     | 0        | 0     |
| PRJNA524132 | SRR8946250  | Bombus terrestris | paired end | 2020 | 2016 | 2016 | United Kingdom | Europe | 21817204  | 0        | 0     | 0        | 0     |
| PRJNA524132 | SRR8946251  | Bombus terrestris | paired end | 2020 | 2016 | 2016 | United Kingdom | Europe | 22037050  | 0        | 0     | 0        | 0     |
| PRJNA524132 | SRR8946252  | Bombus terrestris | paired end | 2020 | 2016 | 2016 | United Kingdom | Europe | 21901898  | 0        | 0     | 0        | 0     |
| PRJNA524132 | SRR8946253  | Bombus terrestris | paired end | 2020 | 2016 | 2016 | United Kingdom | Europe | 21595178  | 0        | 0     | 0        | 0     |
| PRJNA524132 | SRR8946254  | Bombus terrestris | paired end | 2020 | 2016 | 2016 | United Kingdom | Europe | 22044110  | 0        | 0     | 0        | 0     |
| PRJNA524132 | SRR8946255  | Bombus terrestris | paired end | 2020 | 2016 | 2016 | United Kingdom | Europe | 21951458  | 0        | 0     | 0        | 0     |
| PRJNA524132 | SRR8946256  | Bombus terrestris | paired end | 2020 | 2016 | 2016 | United Kingdom | Europe | 22014462  | 0        | 0     | 0        | 0     |
| PRJNA524132 | SRR8946257  | Bombus terrestris | paired end | 2020 | 2016 | 2016 | United Kingdom | Europe | 21883800  | 0        | 0     | 0        | 0     |
| PRJNA524132 | SRR8946258  | Bombus terrestris | paired end | 2020 | 2016 | 2016 | United Kingdom | Europe | 21732358  | 0        | 0     | 0        | 0     |
| PRJNA524132 | SRR8946259  | Bombus terrestris | paired end | 2020 | 2016 | 2016 | United Kingdom | Europe | 21759216  | 0        | 0     | 0        | 0     |
| PRJNA524132 | SRR8946260  | Bombus terrestris | paired end | 2020 | 2016 | 2016 | United Kingdom | Europe | 21163154  | 0        | 0     | 0        | 0     |
| PRJNA646192 | SRR12215891 | Varmoa destructor | single end | 2021 | 2018 | 2018 | Germany        | Europe | 27866085  | 101034   | 0.36  | 24561096 | 88.14 |
| PRJNA646192 | SRR12215902 | Varmoa destructor | single end | 2021 | 2018 | 2018 | Germany        | Europe | 24770899  | 387556   | 1.56  | 19953203 | 80.55 |
| PRJNA646192 | SRR12215913 | Varmoa destructor | single end | 2021 | 2018 | 2018 | Germany        | Europe | 21918003  | 77487    | 0.35  | 15748802 | 71.85 |
| PRJNA646192 | SRR12215924 | Varmoa destructor | single end | 2021 | 2018 | 2018 | Germany        | Europe | 21899381  | 1114     | 0.01  | 17710084 | 80.87 |
| PRJNA646192 | SRR12215935 | Varmoa destructor | single end | 2021 | 2018 | 2018 | Germany        | Europe | 22260731  | 1556     | 0.01  | 270767   | 1.22  |
| PRJNA646192 | SRR12215936 | Varmoa destructor | single end | 2021 | 2018 | 2018 | Germany        | Europe | 27396424  | 32928    | 0.12  | 5081115  | 18.55 |
| PRJNA357165 | SRR5109825  | Varmoa destructor | single end | 2017 | 2013 | 2013 | South Africa   | Africa | 26376162  | 0        | 0     | 1        | 0     |
| PRJNA357165 | SRR5109827  | Varmoa destructor | single end | 2017 | 2013 | 2013 | South Africa   | Africa | 29102112  | 3        | 0     | 1        | 0     |
| PRJNA172020 | SRR533974   | Varmoa destructor | single end | 2015 | NA   | 2013 | NA             | NA     | 22920031  | 4123915  | 17.99 | 1489     | 0.01  |
| PRJNA392105 | SRR5760812  | Varmoa destructor | single end | 2018 | NA   | 2016 | France         | Europe | 28709594  | 7925     | 0.03  | 12772419 | 44.49 |
| PRJNA392105 | SRR5760813  | Varmoa destructor | single end | 2018 | NA   | 2016 | France         | Europe | 31329405  | 1816     | 0.01  | 890019   | 2.84  |
| PRJNA392105 | SRR5760814  | Varmoa destructor | single end | 2018 | NA   | 2016 | France         | Europe | 26670037  | 1172445  | 4.4   | 3934703  | 14.75 |
| PRJNA392105 | SRR5760815  | Varmoa destructor | single end | 2018 | NA   | 2016 | France         | Europe | 24130717  | 1024     | 0     | 3325120  | 13.78 |
| PRJNA392105 | SRR5760816  | Varmoa destructor | single end | 2018 | NA   | 2016 | France         | Europe | 26531852  | 411      | 0     | 10654    | 0.04  |
| PRJNA392105 | SRR5760817  | Varmoa destructor | single end | 2018 | NA   | 2016 | France         | Europe | 27083570  | 1416     | 0.01  | 24888    | 0.09  |
| PRJNA392105 | SRR5760818  | Varmoa destructor | single end | 2018 | NA   | 2016 | France         | Europe | 27017330  | 1090     | 0     | 11625    | 0.04  |
| PRJNA392105 | SRR5760819  | Varmoa destructor | single end | 2018 | NA   | 2016 | France         | Europe | 27902246  | 421      | 0     | 1327730  | 4.76  |
| PRJNA392105 | SRR5760820  | Varmoa destructor | single end | 2018 | NA   | 2016 | France         | Europe | 25675991  | 4558     | 0.02  | 15961    | 0.06  |
| PRJNA392105 | SRR5760821  | Varmoa destructor | single end | 2018 | NA   | 2016 | France         | Europe | 36551386  | 2572     | 0.01  | 15698    | 0.04  |
| PRJNA392105 | SRR5760822  | Varmoa destructor | single end | 2018 | NA   | 2016 | France         | Europe | 41269677  | 181      | 0     | 3109     | 0.01  |
| PRJNA392105 | SRR5760823  | Varmoa destructor | single end | 2018 | NA   | 2016 | France         | Europe | 38107409  | 6819     | 0.02  | 16235    | 0.04  |
| PRJNA392105 | SRR5760824  | Varmoa destructor | single end | 2018 | NA   | 2016 | France         | Europe | 37024580  | 24       | 0     | 1748     | 0     |
| PRJNA392105 | SRR5760825  | Varmoa destructor | single end | 2018 | NA   | 2016 | France         | Europe | 39456450  | 186      | 0     | 2201     | 0.01  |
| PRJNA392105 | SRR5760826  | Varmoa destructor | single end | 2018 | NA   | 2016 | France         | Europe | 28754022  | 1587     | 0.01  | 3765     | 0.01  |
| PRJNA392105 | SRR5760827  | Varmoa destructor | single end | 2018 | NA   | 2016 | France         | Europe | 33433690  | 34       | 0     | 1496     | 0     |
| PRJNA392105 | SRR5760828  | Varmoa destructor | single end | 2018 | NA   | 2016 | France         | Europe | 41817870  | 128      | 0     | 2785     | 0.01  |
| PRJNA392105 | SRR5760829  | Varmoa destructor | single end | 2018 | NA   | 2016 | France         | Europe | 17467280  | 96       | 0     | 1635     | 0.01  |
| PRJNA392105 | SRR5760830  | Varmoa destructor | single end | 2018 | NA   | 2016 | France         | Europe | 22878039  | 530      | 0     | 3951289  | 17.27 |
| PRJNA392105 | SRR5760831  | Varmoa destructor | single end | 2018 | NA   | 2016 | France         | Europe | 27023481  | 20       | 0     | 1286     | 0     |
| PRJNA392105 | SRR5760832  | Varmoa destructor | single end | 2018 | NA   | 2016 | France         | Europe | 21327691  | 159      | 0     | 5782     | 0.03  |
| PRJNA392105 | SRR5760833  | Varmoa destructor | single end | 2018 | NA   | 2016 | France         | Europe | 21528331  | 15       | 0     | 17160    | 0.08  |
| PRJNA392105 | SRR5760834  | Varmoa destructor | single end | 2018 | NA   | 2016 | France         | Europe | 21519896  | 25124    | 0.12  | 54726    | 0.25  |
| PRJNA392105 | SRR5760835  | Varmoa destructor | single end | 2018 | NA   | 2016 | France         | Europe | 21762618  | 1457     | 0.01  | 4080     | 0.02  |
| PRJNA392105 | SRR5760836  | Varmoa destructor | single end | 2018 | NA   | 2016 | France         | Europe | 19848879  | 31       | 0     | 3818     | 0.02  |
| PRJNA392105 | SRR5760837  | Varmoa destructor | single end | 2018 | NA   | 2016 | France         | Europe | 20814439  | 47       | 0     | 2773     | 0.01  |
| PRJNA392105 | SRR5760838  | Varmoa destructor | single end | 2018 | NA   | 2016 | France         | Europe | 22233902  | 288      | 0     | 8717     | 0.04  |
| PRJNA392105 | SRR5760839  | Varmoa destructor | single end | 2018 | NA   | 2016 | France         | Europe | 19908519  | 472      | 0     | 172642   | 0.87  |
| PRJNA392105 | SRR5760840  | Varmoa destructor | single end | 2018 | NA   | 2016 | France         | Europe | 22131893  | 4467     | 0.02  | 212495   | 0.96  |
| PRJNA392105 | SRR5760841  | Varmoa destructor | single end | 2018 | NA   | 2016 | France         | Europe | 37352785  | 6103     | 0.02  | 141836   | 0.38  |
| PRJNA392105 | SRR5760842  | Varmoa destructor | single end | 2018 | NA   | 2016 | France         | Europe | 38386922  | 14155    | 0.04  | 19811530 | 51.61 |
| PRJNA392105 | SRR5760843  | Varmoa destructor | single end | 2018 | NA   | 2016 | France         | Europe | 34156388  | 51891    | 0.15  | 9884607  | 28.94 |
| PRJNA392105 | SRR5760844  | Varmoa destructor | single end | 2018 | NA   | 2016 | France         | Europe | 33659627  | 7491     | 0.02  | 10576076 | 31.42 |
| PRJNA392105 | SRR5760845  | Varmoa destructor | single end | 2018 | NA   | 2016 | France         | Europe | 31188064  | 3846     | 0.01  | 10137599 | 32.5  |
| PRJNA392105 | SRR5760846  | Varmoa destructor | single end | 2018 | NA   | 2016 | France         | Europe | 36849086  | 19795    | 0.05  | 14681437 | 39.84 |
| PRJNA392105 | SRR5760847  | Varmoa destructor | single end | 2018 | NA   | 2016 | France         | Europe | 27248138  | 5892     | 0.02  | 11386068 | 41.79 |
| PRJNA392105 | SRR5760848  | Varmoa destructor | single end | 2018 | NA   | 2016 | France         | Europe | 28625532  | 4830     | 0.02  | 7926929  | 27.69 |
| PRJNA392105 | SRR5760849  | Varmoa destructor | single end | 2018 | NA   | 2016 | France         | Europe | 32563456  | 8639987  | 26.53 | 11238183 | 34.51 |
| PRJNA392105 | SRR5760850  | Varmoa destructor | single end | 2018 | NA   | 2016 | France         | Europe | 29446920  | 5151     | 0.02  | 1596821  | 5.42  |
| PRJNA392105 | SRR5760851  | Varmoa destructor | single end | 2018 | NA   | 2016 | France         | Europe | 25029153  | 2125     | 0.01  | 407680   | 1.63  |
| PRJNA437729 | SRR6824277  | Varmoa destructor | single end | 2018 | 2014 | 2014 | Syria          | Asia   | 36692614  | 20164628 | 54.96 | 3069616  | 8.37  |
| PRJNA628859 | SRR11624168 | Varmoa destructor | paired end | 2020 | 2019 | 2019 | China          | Asia   | 111930228 | 6402392  | 5.72  | 13082    | 0.01  |
| PRJNA628859 | SRR11624169 | Varmoa destructor | paired end | 2020 | 2019 | 2019 | China          | Asia   | 84224988  | 1910192  | 2.27  | 1828     | 0     |
| PRJNA628859 | SRR11624170 | Varmoa destructor | paired end | 2020 | 2019 | 2019 | China          | Asia   | 88932536  | 3606394  | 4.06  | 3717     | 0     |
| PRJNA642791 | SRR12108021 | Varmoa destructor | paired end | 2021 | NA   | 2019 | Belgium        | Europe | 38869728  | 12928676 | 33.26 | 13532884 | 34.82 |
| PRJNA642791 | SRR12108022 | Varmoa destructor | paired end | 2021 | NA   | 2019 | Belgium        | Europe | 37454684  | 3911     | 0.01  | 4607     | 0.01  |
| PRJNA642791 | SRR12108023 | Varmoa destructor | paired end | 2021 | NA   | 2019 | Belgium        | Europe | 35294754  | 9300592  | 26.35 | 471544   | 1.34  |
| PRJNA642791 | SRR12108024 | Varmoa destructor | paired end | 2021 | NA   | 2019 | Belgium        | Europe | 26886100  | 4649     | 0.02  | 4329     | 0.02  |
| PRJNA642791 | SRR12108025 | Varmoa destructor | paired end | 2021 | NA   | 2019 | Belgium        | Europe | 40795332  | 1343760  | 3.29  | 4181200  | 10.25 |
| PRJNA642791 | SRR12108026 | Varmoa destructor | paired end | 2021 | NA   | 2019 | Belgium        | Europe | 40206770  | 7798378  | 19.4  | 1383972  | 3.44  |
| PRJNA642791 | SRR12108027 | Varmoa destructor | paired end | 2021 | NA   | 2019 | Belgium        | Europe | 34998098  | 107099   | 0.31  | 2367114  | 6.76  |
| PRJNA642791 | SRR12108028 | Varmoa destructor | paired end | 2021 | NA   | 2019 | Belgium        | Europe | 36686522  | 33369    | 0.09  | 43717    | 0.12  |
| PRJNA642791 | SRR12108029 | Varmoa destructor | paired end | 2021 | NA   | 2019 | Belgium        | Europe | 43452536  | 13844060 | 31.86 | 1731218  | 3.98  |
| PRJNA642791 | SRR12108030 | Varmoa destructor | paired end | 2021 | NA   | 2019 | Belgium        | Europe | 33431462  | 123      |       |          |       |

## NCBI\_tot

|             |            |                  |            |      |      |      |                |               |           |           |       |          |       |
|-------------|------------|------------------|------------|------|------|------|----------------|---------------|-----------|-----------|-------|----------|-------|
| PRJNA383492 | SRR5457677 | Varoa destructor | paired end | 2018 | 2016 | 2016 | Israel         | Asia          | 145512510 | 64192930  | 44.12 | 51708130 | 35.54 |
| PRJNA383492 | SRR5457678 | Varoa destructor | paired end | 2018 | 2016 | 2016 | Israel         | Asia          | 131312486 | 55363600  | 42.16 | 45646800 | 34.76 |
| PRJNA383492 | SRR5457680 | Varoa destructor | paired end | 2018 | 2016 | 2016 | Israel         | Asia          | 147718332 | 80584000  | 54.55 | 45016158 | 30.47 |
| PRJNA383492 | SRR5457681 | Varoa destructor | paired end | 2018 | 2016 | 2016 | Israel         | Asia          | 134744390 | 61271600  | 45.47 | 31271600 | 23.21 |
| PRJNA437729 | SRR6823684 | Varoa destructor | paired end | 2018 | 2014 | 2014 | Syria          | Asia          | 73385228  | 40455294  | 55.13 | 5956320  | 8.12  |
| PRJNA437731 | SRR6823686 | Varoa destructor | paired end | 2018 | 2014 | 2014 | Algeria        | Africa        | 70972834  | 1491700   | 2.1   | 42441    | 0.06  |
| PRJNA473410 | SRR7252454 | Varoa destructor | paired end | 2018 | 2016 | 2016 | Israel         | Asia          | 39756204  | 9341734   | 23.5  | 7298152  | 18.36 |
| PRJNA473410 | SRR7252455 | Varoa destructor | paired end | 2018 | 2016 | 2016 | Israel         | Asia          | 36248728  | 9535444   | 26.31 | 9755266  | 26.91 |
| PRJNA473410 | SRR7252456 | Varoa destructor | paired end | 2018 | 2016 | 2016 | Israel         | Asia          | 41689426  | 13827532  | 33.17 | 12188626 | 29.24 |
| PRJNA473410 | SRR7252457 | Varoa destructor | paired end | 2018 | 2016 | 2016 | Israel         | Asia          | 42013158  | 19472500  | 46.35 | 11316460 | 26.94 |
| PRJNA473410 | SRR7252458 | Varoa destructor | paired end | 2018 | 2016 | 2016 | Israel         | Asia          | 38804090  | 13349320  | 34.4  | 7504114  | 19.34 |
| PRJNA473410 | SRR7252459 | Varoa destructor | paired end | 2018 | 2016 | 2016 | Israel         | Asia          | 40341546  | 9763260   | 24.2  | 10562400 | 26.18 |
| PRJNA473410 | SRR7252460 | Varoa destructor | paired end | 2018 | 2016 | 2016 | Israel         | Asia          | 42994404  | 15990860  | 37.19 | 7773900  | 18.08 |
| PRJNA473410 | SRR7252461 | Varoa destructor | paired end | 2018 | 2016 | 2016 | Israel         | Asia          | 42516272  | 17768780  | 41.79 | 10156098 | 23.89 |
| PRJNA473410 | SRR7252462 | Varoa destructor | paired end | 2018 | 2016 | 2016 | Israel         | Asia          | 46892994  | 23259776  | 49.6  | 12250656 | 26.12 |
| PRJNA473410 | SRR7252463 | Varoa destructor | paired end | 2018 | 2016 | 2016 | Israel         | Asia          | 43819920  | 20978800  | 47.88 | 11975640 | 27.33 |
| PRJNA473410 | SRR7252464 | Varoa destructor | paired end | 2018 | 2016 | 2016 | Israel         | Asia          | 43047370  | 10842980  | 25.19 | 5949568  | 13.82 |
| PRJNA473410 | SRR7252465 | Varoa destructor | paired end | 2018 | 2016 | 2016 | Israel         | Asia          | 38810416  | 8810196   | 22.7  | 7841536  | 20.2  |
| PRJNA475855 | SRR7339931 | Varoa destructor | paired end | 2018 | 2016 | 2016 | Thailand       | Asia          | 255750226 | 12951     | 0.01  | 4139     | 0     |
| PRJNA486893 | SRR8100122 | Varoa destructor | paired end | 2019 | 2017 | 2017 | China          | Asia          | 205516488 | 122068692 | 59.4  | 114731   | 0.06  |
| PRJNA486893 | SRR8100123 | Varoa destructor | paired end | 2019 | 2017 | 2017 | China          | Asia          | 51391404  | 35493640  | 69.07 | 46129    | 0.09  |
| PRJNA486893 | SRR8100124 | Varoa destructor | paired end | 2019 | 2017 | 2017 | China          | Asia          | 204318580 | 60770400  | 29.74 | 2306980  | 1.13  |
| PRJNA531374 | SRR8864012 | Varoa destructor | paired end | 2019 | 2014 | 2014 | United Kingdom | Europe        | 321761388 | 282156    | 0.09  | 80278722 | 24.95 |
| PRJNA531527 | SRR8867385 | Varoa destructor | paired end | 2019 | 2012 | 2012 | USA            | North America | 27157060  | 21083200  | 77.63 | 4240280  | 15.61 |

Table S2. First records of DWV-B from a country or region in the literature.

|    | DOI/www of reference                                                                        | Detection | Sequencing            | DWV-A prevalence | DWV-B prevalence | sample size/type     |
|----|---------------------------------------------------------------------------------------------|-----------|-----------------------|------------------|------------------|----------------------|
| 1  | 10.1099/vir.0.80470-0                                                                       | PCR       | Sanger of genome      | n=1              | n=1              | pool of mites        |
| 2  | 10.1007/s00705-020-04863-5                                                                  | qPCR      | no                    | n=1              | n=1              | 1 colony             |
| 3  | 10.3390/v9110314                                                                            | qPCR      | Sanger of PCR product | 100%             | 57%              | 14 colonies          |
| 4  | 10.1016/j.virol.2011.05.009                                                                 | PCR       | Sanger of PCR product | 100%             | 100%             | 3 colonies           |
| 5  | 10.1371/journal.pone.0016217                                                                | PCR       | no                    | 100%             | 67%              | 30 queens            |
| 6  | 10.1126/science.aac9976                                                                     | PCR       | Sanger of PCR product | 67%              | 73%              | 15 bees              |
| 7  | 10.1126/science.aac9976                                                                     | PCR       | Sanger of PCR product | 80%              | 40%              | 2 bees, 3 mites      |
| 8  | 10.1371/journal.pone.0206938                                                                | NGS       | Ion Torrent           | high             | very few reads   | 7 NGS libraries      |
| 9  | 10.3389/fgene.2015.00100                                                                    | NGS       | illumina              | all 6 sites      | all 6 sites      | 6 sites/NGS pools    |
| 10 | 10.1038/s41598-017-17802-3                                                                  | qPCR      | illumina              | 100%             | 3%               | 75 colonies          |
| 11 | http://www.bulletinofinsectology.org/pdfarticles/vol71-2018-273-282abdi.pdf                 | qPCR      | Sanger of PCR product | 27%              | 7%               | 56 colonies          |
| 12 | 10.1038/nature12977                                                                         | PCR       | Sanger of PCR product | 3%               | 8%               | 490 workers          |
| 13 | 10.1515/jas-2015-0005                                                                       | qPCR      | no                    | 90%              | 100%             | 20 colonies          |
| 14 | 10.1098/rspb.2016.2149                                                                      | NGS       | illumina              | n=0              | n=1              | n=1 colony           |
| 15 | 10.1038/ismej.2015.186                                                                      | NGS       | illumina              | all 4 libraries  | all 4 libraries  | 4 NGS libraries      |
| 16 | https://www.au-ibar.org/bulletin-of-animal-health-and-production-in-africa?showall=&start=1 | NGS       | 454                   | 45% (reads)      | 55% (reads)      | 16 NGS libraries     |
| 17 | 10.1016/j.jip.2017.04.002                                                                   | MLPA      | Sanger of PCR product | >29%             | <29%             | 40 bees              |
| 18 | 10.1038/s41598-017-15358-w                                                                  | qPCR      | no                    | not screened     | high             | 4 colonies (401 bee  |
| 19 | 10.1007/s13592-017-0530-6                                                                   | PCR       | no                    | 38%              | 6%               | 16 sites             |
| 20 | 10.1038/srep10454                                                                           | NGS       | illumina              | present          | present          | 8 NGS libraries      |
| 21 | 10.1016/j.jip.2020.107324                                                                   | qPCR      | no                    | 100%             | 100%             | 2 colonies           |
| 22 | 10.1007/s13592-019-00660-5                                                                  | qPCR      | Sanger of genome      | 90%              | 90%              | 10 colonies          |
| 23 | 10.1099/jgv.0.001206                                                                        | qPCR      | Sanger of PCR product | 100%             | 11%              | 27 colonies          |
| 24 | 10.1080/00218839.2019.1670993                                                               | qPCR      | Sanger of PCR product | 71%              | 3%               | 612 colonies         |
| 25 | 10.1038/s41598-019-48618-y                                                                  | qPCR      | Sanger of PCR product | 46%              | 2%               | 117 colonies         |
| 26 | 10.1098/rsbl.2018.0001                                                                      | qPCR      | Sanger of PCR product | 0%               | 5%               | 20 Eristalis arbusto |
| 27 | 10.1080/00218839.2019.1670993                                                               | qPCR      | Sanger of PCR product | 91%              | 47%              | 45 apiaries          |
| 28 | 10.3390/v12111218                                                                           | qPCR      | illumina              | 0%               | 100%             | 20 colonies          |
| 29 | 10.1016/j.mcp.2021.101731                                                                   | PCR       | Sanger of PCR product | all sites        | all sites        | 14 sites             |
| 30 | 10.3390/insects12121051                                                                     | qPCR      | no                    | 58%              | 26%              | 250 colonies         |
| 31 | 10.3390/app12042134                                                                         | qPCR      | no                    | 51%              | 18%              | 171 colonies         |

NB Thaduri et al. (2018) and post 2010 records from Europe (highlighted in yellow) have not been added to Figure 2.

NNB First records in *Bombus* spp. and a hover fly sp. (highlighted in green) have not been added to Figure 2.

| Host species         | Year of collection | Region     | Country         | Publication                  | Journal                                  | Source in original publication         |
|----------------------|--------------------|------------|-----------------|------------------------------|------------------------------------------|----------------------------------------|
| Varroa destructor    | 2001               | Europe     | The Netherlands | Ongus et al., 2004           | Journal of General Virology              | text                                   |
| Apis mellifera       | 2004               | Africa     | South Africa    | de Souza et al., 2021        | Archives of Virology                     | Table 1                                |
| Apis mellifera       | 2006               | Europe     | England         | Kevill et al., 2017          | Viruses                                  | Fig. 6                                 |
| Apis mellifera       | 2008               | Asia       | Israel          | Zioni et al., 2011           | Virology                                 | text                                   |
| Apis mellifera       | 2007-2009          | Europe     | France          | Gauthier et al., 2011        | PLoS ONE                                 | Table 3                                |
| Apis mellifera       | 2009               | Europe     | Germany         | Wilfert et al., 2016         | Science                                  | Table S1                               |
| Apis mellifera       | 2009               | Europe     | Romania         | Wilfert et al., 2016         | Science                                  | Table S1                               |
| Apis mellifera       | 2009-2010          | Europe     | Sweden          | Thaduri et al., 2018         | PLoS ONE                                 | text                                   |
| Apis mellifera       | 2010               | Asia       | Turkey          | Tozkar et al., 2015          | Frontiers in Genetics                    | Table 4 (in Supplement )               |
| Apis mellifera       | 2010               | N. America | USA             | Ryabov et al., 2017          | Scientific Reports                       | Fig. 2                                 |
| Apis mellifera       | 2011               | Africa     | Tunisia         | Abdi et al., 2018            | Bulletin of Insectology                  | Table S1                               |
| Bombus spp.          | 2011               | Europe     | UK              | Furst et al., 2014           | Nature                                   | Inferred from Fig. 3, text and Fig. S1 |
| Apis mellifera       | 2011-2012          | Europe     | Luxemburg       | Clermont et al., 2015        | Journal of Apicultural Science           | based on 1st sample date               |
| Apis mellifera       | 2012               | Europe     | Belgium         | Benaets et al., 2017         | Proceedings Royal Society London B       | Suppl. Methods, text                   |
| Apis mellifera       | 2012-2013          | Pacific    | USA (Hawaii)    | Mordecai et al., 2016        | ISME Journal                             | Fig. 3, Table S1                       |
| Apis mellifera       | 2012-2013          | Africa     | Kenya           | Onyango et al., 2016         | Bulletin Animal Health Production Africa | Table 1                                |
| Apis mellifera       | 2014               | Asia       | Georgia         | Radzevičiūtė et al., 2017    | Journal of Invertebrate Pathology        | Fig. 4, Appendix Table A2              |
| Apis mellifera       | 2014               | Europe     | Austria         | Tritschler et al., 2017      | Scientific Reports                       | text, Fig. 3                           |
| Apis mellifera       | 2014 *             | Asia       | Yemen           | Haddad et al., 2018          | Apidologie                               | * date pers comm Horth                 |
| Apis mellifera       | 2014               | Pacific    | New Zealand     | Mondet et al., 2015          | Scientific Reports                       | text                                   |
| Apis mellifera       | 2015 *             | Asia       | Philippines     | de Guzman et al., 2020       | Journal of Invertebrate Pathology        | * date pers comm Simone-Finstrom       |
| Apis mellifera       | 2015               | Europe     | Spain           | Barroso-Arévalo et al., 2019 | Apidologie                               | Suppl. Data 4 and 5                    |
| Apis mellifera       | 2015               | S. America | Brazil          | de Souza et al., 2019        | Journal of General Virology              | Fig. 3, text                           |
| Apis mellifera       | 2015               | S. America | Chile           | Riveros et al., 2020         | Journal of Apicultural Research          | text                                   |
| Apis mellifera       | 2015               | Asia       | China           | Diao et al., 2019            | Scientific Reports                       | text                                   |
| Eristalis arbustorum | 2016               | Europe     | UK              | Bailes et al., 2018          | Biology Letters                          | Table 1, text                          |
| Apis mellifera       | 2016               | S. America | Argentina       | Brascesco et al., 2021       | Bulletin of Entomological Research       | Table 1, text                          |
| Apis mellifera       | 2017               | Africa     | Ethiopia        | Gebremedhn et al., 2020      | Viruses                                  | Fig. 3, Fig. 4                         |
| Apis mellifera       | 2017-2018          | Africa     | Egypt           | Abd-El-Samie et al., 2021    | Molecular and Cellular Probes            | text                                   |
| Apis mellifera       | 2019               | Europe     | Czech Republic  | Mráz et al., 2021            | Insects                                  | estimate from Fig. 5                   |
| Apis mellifera       | 2020               | Europe     | Italy           | Bordin et al., 2022          | Applied Sciences                         | text                                   |

Table S3. DWV prevalence in honey bees at 7 sites in 2011 and 2017 on mainland UK

| Site code | Site code in McMahon et al. 2016 | N honey bees (2011) | N DWV-A (2011) | N DWV-B (2011) | N honey bees (2017) | N DWV-A (2017) | N DWV-B (2017) | pA(2011) | pA(2017) | pB(2011) | pB(2017) |
|-----------|----------------------------------|---------------------|----------------|----------------|---------------------|----------------|----------------|----------|----------|----------|----------|
| AM        | 29                               | 10                  | 7              | 0              | 13                  | 1              | 5              | 0.700    | 0.077    | 0.000    | 0.385    |
| BM        | 4                                | 10                  | 0              | 0              | 22                  | 2              | 15             | 0.000    | 0.091    | 0.000    | 0.682    |
| CM        | 5                                | 8                   | 4              | 1              | 29                  | 0              | 4              | 0.500    | 0.000    | 0.125    | 0.138    |
| IM        | 11                               | 2                   | 0              | 0              | 8                   | 1              | 3              | 0.000    | 0.125    | 0.000    | 0.375    |
| NM (F)    | 16                               | 8                   | 1              | 0              | 7                   | 1              | 0              | 0.125    | 0.143    | 0.000    | 0.000    |
| O(M)      | 17                               | 8                   | 2              | 1              | 18                  | 6              | 2              | 0.250    | 0.333    | 0.125    | 0.111    |
| WM        | 25                               | 9                   | 3              | 9              | 9                   | 0              | 2              | 0.333    | 0.000    | 1.000    | 0.222    |
| Total     |                                  | 55                  | 17             | 11             | 106                 | 11             | 31             | 0.309    | 0.104    | 0.200    | 0.292    |

Table S4. Results of screening German colonies from 2013, 2019 and 2020, with primers used in RT-qPCR

|         |     |                       |                                               |
|---------|-----|-----------------------|-----------------------------------------------|
| DWV (1) | For | TTTGCAAGATGCTGTATGTGG | Gauthier et al., Apidologie 38 (2007) 426–435 |
|         | Rev | GTCGTGCAGCTCGATAGGAT  |                                               |

|         |     |                         |                                                                  |
|---------|-----|-------------------------|------------------------------------------------------------------|
| DWV (2) | For | GGTCCGCGCTAAGATTGTA     | Blanchard et al., Journal of Virological Methods 141 (2007) 7–13 |
|         | Rev | CGGCTGTTTGTATGGAAGAAGTT |                                                                  |

|         |     |                           |                                                     |
|---------|-----|---------------------------|-----------------------------------------------------|
| DWV (3) | For | CCTGCTAATCAACAAGGACCTGG   | Genersch, The Veterinary Journal 169 (2005) 121-123 |
|         | Rev | CAGAACCAATGTCTAACGCTAACCC |                                                     |

|                           |             |        |        |      |           |    |
|---------------------------|-------------|--------|--------|------|-----------|----|
| <b>Evaluation:</b>        | +++         | ++     | +      | (+)  | -         |    |
| Classic PCR (band on gel) | very strong | strong | medium | weak | very weak | no |

|       |       |                            |                                                                |
|-------|-------|----------------------------|----------------------------------------------------------------|
| DWV-A | For   | GCGGCTAAGATTGTAATTG        | Schurr et al., Journal of Virological Methods 270 (2019) 70–78 |
|       | Rev   | GTGACTAGCATAACCATGATTA     |                                                                |
|       | Probe | CCTTGACCAGTAGACACAGCATC    |                                                                |
| DWV-B | For   | GGTCTGAAGCGAAAATAG         |                                                                |
|       | Rev   | CTAGCATATCCATGATTATAAAC    |                                                                |
|       | Probe | CCTTGTCCAGTAGATACAGCATCACA |                                                                |

|                    |         |              |              |              |             |        |
|--------------------|---------|--------------|--------------|--------------|-------------|--------|
| <b>Evaluation:</b> | +++     | ++           | +            | (+)          | -           |        |
| RT-qPCR            | Cq < 20 | 20 ≤ Cq < 28 | 28 ≤ Cq < 32 | 32 ≤ Cq < 35 | 35 ≤ Cq < * | Cq ≥ * |

(\*DWV-A=36; \*DWV-B=37)

|         |       |                           |                                                                          |
|---------|-------|---------------------------|--------------------------------------------------------------------------|
| β-Actin | For   | AGGAATGGAAGCTTGC GGTA     | Chen et al., Applied and Environmental Microbiology 71(1) (2005) 436-441 |
|         | Rev   | AATTTTCATGGTGGATGGTGC     |                                                                          |
|         | Probe | ATGCCAACACTGTCTTCTGGAGGTA |                                                                          |

| 2013 | federal state | Classic PCR | RT-qPCR analysed in 2021 |       |       |       |              |
|------|---------------|-------------|--------------------------|-------|-------|-------|--------------|
|      |               | DWV (1)     | DWV-A                    | Cq    | DWV-B | Cq    | β-Actin [Cq] |
| 1    | BW            | ++          | (+)                      | 35.99 | ++++  | 8.80  | 25.45        |
| 2    | MV            | +++         | +++                      | 21.58 | ++++  | 11.15 | 25.04        |
| 3    | BY            | +++         | ++++                     | 17.54 | ++++  | 5.86  | 24.77        |
| 4    | SN            | ++          | +                        | 34.00 | ++++  | 10.45 | 26.28        |
| 5    | BY            | +++         | ++++                     | 18.17 | ++++  | 10.69 | 26.31        |
| 6    | SN            | ++          | ++                       | 30.17 | ++    | 30.34 | 26.19        |
| 7    | SN            | +++         | ++++                     | 17.82 | ++++  | 15.28 | 26.31        |
| 8    | BW            | ++          | ++                       | 31.84 | ++++  | 11.77 | 26.50        |
| 9    | BW            | ++          | +                        | 34.77 | ++++  | 12.33 | 25.99        |
| 10   | NI            | +++         | ++                       | 29.32 | ++++  | 14.41 | 27.68        |
| 11   | NI            | +++         | -                        | N/A   | ++++  | 12.26 | 26.40        |
| 12   | HE            | +++         | +++                      | 24.97 | ++++  | 14.44 | 26.64        |
| 13   | NW            | +++         | +++                      | 27.17 | +++   | 27.81 | 24.81        |
| 14   | BY            | +++         | ++                       | 30.33 | ++++  | 17.32 | 27.04        |
| 15   | SH            | +++         | ++                       | 30.09 | ++++  | 19.51 | 28.27        |
| 16   | SH            | +++         | ++                       | 28.83 | +++   | 26.27 | 26.30        |
| 17   | NI            | -           | -                        | N/A   | ++    | 29.18 | 24.76        |
| 18   | NI            | +           | -                        | N/A   | (+)   | 35.50 | 26.39        |
| 19   | SA            | +++         | ++++                     | 15.43 | ++++  | 14.24 | 26.84        |
| 20   | BW            | ++          | ++                       | 29.51 | +++   | 27.64 | 25.25        |
| 21   | BW            | ++          | ++                       | 30.53 | ++++  | 12.32 | 23.50        |
| 22   | BY            | ++          | ++                       | 30.11 | ++    | 29.47 | 23.65        |
| 23   | NI            | ++          | +                        | 32.38 | ++    | 29.17 | 24.25        |
| 24   | NI            | ++          | +                        | 32.06 | +++   | 26.30 | 22.95        |
| 25   | BW            | ++          | +                        | 34.53 | +++   | 25.35 | 26.92        |
| 26   | TH            | +++         | +                        | 33.37 | ++++  | 16.99 | 24.58        |
| 27   | ST            | ++          | +                        | 34.28 | ++    | 28.05 | 25.71        |
| 28   | NI            | -           | (+)                      | 35.32 | ++++  | 15.33 | 26.56        |
| 29   | NI            | ++          | -                        | N/A   | ++++  | 16.30 | 27.22        |
| 30   | NI            | ++          | -                        | N/A   | ++++  | 18.23 | 25.28        |
| 31   | NI            | ++          | +                        | 33.30 | ++++  | 15.88 | 24.85        |
| 32   | NI            | +           | -                        | N/A   | +++   | 26.13 | 27.47        |
| 33   | NI            | +           | (+)                      | 35.66 | ++    | 30.10 | 25.58        |
| 34   | BW            | -           | -                        | N/A   | +++   | 26.84 | 28.13        |
| 35   | BW            | -           | -                        | N/A   | +++   | 25.22 | 26.26        |
| 36   | BW            | -           | -                        | N/A   | ++++  | 18.55 | 26.15        |
| 37   | SL            | -           | -                        | N/A   | ++    | 31.76 | 28.50        |

|    |    |     |      |       |      |       |       |
|----|----|-----|------|-------|------|-------|-------|
| 38 | BW | -   | -    | N/A   | +++  | 20.24 | 25.41 |
| 39 | BW | -   | -    | N/A   | +++  | 23.34 | 24.98 |
| 40 | BW | +++ | -    | N/A   | +++  | 26.24 | 24.76 |
| 41 | BW | +   | -    | N/A   | ++   | 28.52 | 24.41 |
| 42 | NI | -   | -    | N/A   | +    | 32.23 | 26.39 |
| 43 | SH | -   | -    | N/A   | +++  | 26.20 | 25.35 |
| 44 | BB | -   | -    | N/A   | -    | N/A   | 25.34 |
| 45 | NW | ++  | -    | N/A   | +    | 34.95 | 22.98 |
| 46 | HE | -   | -    | N/A   | +    | 33.08 | 25.35 |
| 47 | SH | ++  | -    | N/A   | ++   | 30.03 | 25.80 |
| 48 | BY | -   | -    | N/A   | +    | 34.98 | 25.10 |
| 49 | BY | +++ | ++++ | 19.57 | (+)  | 36.64 | 23.07 |
| 50 | BY | ++  | +    | 34.23 | +    | 33.20 | 19.36 |
| 51 | BY | ++  | +    | 32.42 | +    | 32.17 | 21.56 |
| 52 | NI | -   | -    | N/A   | +++  | 26.50 | 25.28 |
| 53 | RP | -   | (+)  | 35.23 | ++   | 29.63 | 24.78 |
| 54 | BB | -   | -    | N/A   | (+)  | 35.90 | 22.38 |
| 55 | BB | -   | -    | N/A   | (+)  | 36.67 | 25.13 |
| 56 | BW | -   | -    | N/A   | ++   | 31.20 | 25.17 |
| 57 | SN | ++  | +    | 33.18 | ++   | 29.33 | 26.05 |
| 58 | NW | +   | -    | N/A   | +    | 33.57 | 27.22 |
| 59 | BY | +   | -    | N/A   | +    | 34.93 | 24.78 |
| 60 | HE | +   | -    | N/A   | +    | 33.84 | 25.71 |
| 61 | SN | ++  | +    | 32.10 | ++   | 29.78 | 26.41 |
| 62 | NW | ++  | -    | N/A   | +++  | 22.65 | 25.63 |
| 63 | NI | +   | -    | N/A   | ++++ | 15.04 | 22.21 |
| 64 | SN | +++ | +++  | 23.11 | ++   | 28.98 | 23.27 |
| 65 | SN | +++ | +++  | 24.47 | ++   | 30.61 | 25.05 |
| 66 | NI | ++  | -    | N/A   | ++++ | 18.67 | 25.74 |
| 67 | HE | +   | ++   | 31.59 | ++++ | 13.17 | 25.61 |
| 68 | SN | ++  | ++++ | 15.04 | ++++ | 13.17 | 25.87 |
| 69 | SN | ++  | ++++ | 11.57 | ++++ | 13.71 | 25.79 |
| 70 | SN | ++  | ++++ | 11.30 | ++++ | 12.03 | 22.32 |

| 2019 | federal state | Classic PCR | RT-qPCR |       | Classic PCR | RT-qPCR |       | $\beta$ -Actin [Cq] |
|------|---------------|-------------|---------|-------|-------------|---------|-------|---------------------|
|      |               | DWV (2)     | DWV-A   | Cq    | DWV (3)     | DWV-B   | Cq    |                     |
| 1    | SN            | -           | -       | N/A   | ++          | ++++    | 19.17 | 22.63               |
| 2    | SN            | -           | -       | N/A   | +++         | ++++    | 9.47  | 23.11               |
| 3    | ST            | -           | -       | N/A   | +++         | ++++    | 12.60 | 24.04               |
| 4    | MV            | ++++        | ++++    | 18.70 | +++         | ++++    | 11.40 | 24.01               |
| 5    | BB            | -           | -       | N/A   | +++         | ++++    | 12.61 | 21.29               |
| 6    | BY            | ++          | +++     | 26.80 | +++         | ++++    | 7.93  | 24.26               |
| 7    | BY            | -           | -       | N/A   | +           | +++     | 24.93 | 20.08               |
| 8    | MV            | -           | -       | N/A   | (+)         | +++     | 26.75 | 26.74               |
| 9    | SH            | -           | -       | N/A   | +++         | ++++    | 12.76 | 26.76               |
| 10   | SN            | -           | -       | N/A   | +++         | ++++    | 11.13 | 21.27               |
| 11   | BY            | -           | -       | N/A   | +++         | ++++    | 7.26  | 21.04               |
| 12   | MV            | -           | -       | N/A   | +++         | ++++    | 9.77  | 23.91               |
| 13   | MV            | -           | -       | N/A   | +++         | ++++    | 10.20 | 23.76               |
| 14   | MV            | -           | -       | N/A   | +++         | ++++    | 13.08 | 21.20               |
| 15   | MV            | -           | -       | N/A   | +++         | ++++    | 9.40  | 23.32               |
| 16   | NI            | -           | -       | N/A   | -           | ++      | 29.54 | 19.75               |
| 17   | SH            | -           | -       | N/A   | +++         | +++     | 24.47 | 23.97               |
| 18   | BY            | -           | -       | N/A   | ++++        | ++++    | 10.54 | 22.44               |
| 19   | SN            | -           | -       | N/A   | ++++        | ++++    | 12.63 | 23.43               |
| 20   | SN            | -           | -       | N/A   | +++         | ++++    | 14.71 | 25.96               |
| 21   | BY            | -           | -       | N/A   | ++          | ++      | 31.44 | 26.07               |
| 22   | HE            | -           | -       | N/A   | +++         | +++     | 25.06 | 26.46               |
| 23   | NW            | -           | -       | N/A   | +++         | +++     | 27.31 | 25.24               |
| 24   | SN            | -           | -       | N/A   | +++         | +++     | 26.11 | 25.14               |
| 25   | HH            | -           | -       | N/A   | (+)         | ++      | 31.40 | 23.00               |
| 26   | BW            | -           | -       | N/A   | -           | +       | 32.48 | 25.70               |
| 27   | BY            | -           | -       | N/A   | ++++        | ++++    | 19.31 | 24.63               |
| 28   | NW            | -           | -       | N/A   | -           | +       | 34.38 | 23.93               |
| 29   | BW            | -           | -       | N/A   | -           | ++      | 29.96 | 25.57               |
| 30   | BW            | -           | -       | N/A   | ++++        | ++++    | 19.86 | 25.72               |
| 31   | BY            | -           | -       | N/A   | (+)         | ++      | 31.33 | 22.18               |
| 32   | BY            | -           | -       | N/A   | (+)         | +++     | 26.65 | 23.93               |
| 33   | TH            | -           | -       | N/A   | ++++        | ++++    | 11.03 | 24.48               |
| 34   | BB            | -           | -       | N/A   | ++++        | ++++    | 16.27 | 24.50               |

|    |    |   |   |     |      |      |       |       |
|----|----|---|---|-----|------|------|-------|-------|
| 35 | HE | + | - | N/A | -    | +    | 32.29 | 24.41 |
| 36 | SN | - | - | N/A | (+)  | ++   | 31.33 | 24.97 |
| 37 | BY | - | - | N/A | +++  | ++++ | 8.33  | 21.55 |
| 38 | HE | - | - | N/A | (+)  | +++  | 27.63 | 24.34 |
| 39 | NW | - | - | N/A | +++  | ++   | 30.28 | 24.79 |
| 40 | BW | - | - | N/A | -    | ++++ | 17.37 | 23.38 |
| 41 | BW | - | - | N/A | -    | (+)  | 35.41 | 25.42 |
| 42 | BW | - | - | N/A | +++  | ++++ | 18.59 | 25.55 |
| 43 | ST | - | - | N/A | ++++ | ++++ | 13.52 | 23.74 |
| 44 | BY | - | - | N/A | -    | +    | 33.04 | 26.21 |
| 45 | RP | - | - | N/A | (+)  | ++   | 28.19 | 22.72 |
| 46 | BY | - | - | N/A | ++++ | +++  | 23.29 | 22.42 |
| 47 | BY | - | - | N/A | +    | +++  | 23.81 | 24.09 |
| 48 | BW | - | - | N/A | +    | +++  | 22.77 | 20.42 |
| 49 | BY | - | - | N/A | +++  | +++  | 23.45 | 20.54 |
| 50 | MV | - | - | N/A | -    | ++   | 31.92 | 19.49 |
| 51 | NW | - | - | N/A | ++++ | ++++ | 6.97  | 20.18 |
| 52 | BY | - | - | N/A | ++   | +++  | 24.21 | 22.08 |
| 53 | BY | - | - | N/A | +++  | +++  | 22.16 | 22.39 |
| 54 | BW | - | - | N/A | +++  | ++++ | 19.30 | 21.21 |
| 55 | BY | - | - | N/A | -    | ++   | 28.60 | 20.34 |
| 56 | BY | - | - | N/A | ++++ | ++++ | 11.11 | 21.21 |
| 57 | TH | - | - | N/A | ++++ | ++++ | 17.68 | 19.05 |
| 58 | BY | - | - | N/A | ++   | +++  | 26.11 | 22.79 |
| 59 | NW | - | - | N/A | +    | ++   | 28.36 | 22.78 |
| 60 | BY | - | - | N/A | +    | ++   | 29.01 | 23.09 |
| 61 | NI | - | - | N/A | -    | (+)  | 35.57 | 23.85 |
| 62 | BW | - | - | N/A | ++++ | ++++ | 10.12 | 20.50 |
| 63 | SN | - | - | N/A | ++++ | ++++ | 10.80 | 25.82 |
| 64 | SN | - | - | N/A | ++++ | ++++ | 10.86 | 23.11 |
| 65 | MV | - | - | N/A | ++++ | ++++ | 10.89 | 24.23 |
| 66 | BY | - | - | N/A | ++++ | ++++ | 9.71  | 18.51 |
| 67 | HE | - | - | N/A | +++  | ++++ | 18.23 | 19.00 |
| 68 | SH | - | - | N/A | ++   | ++++ | 16.18 | 21.80 |
| 69 | BY | - | - | N/A | +++  | ++++ | 12.83 | 25.50 |
| 70 | SN | - | - | N/A | ++++ | ++++ | 13.89 | 21.77 |

| 2020 | federal state | Classic PCR | RT-qPCR |       |         | Classic PCR | RT-qPCR |              |  |
|------|---------------|-------------|---------|-------|---------|-------------|---------|--------------|--|
|      |               | DWV (2)     | DWV-A   | Cq    | DWV (3) | DWV-B       | Cq      | β-Actin [Cq] |  |
| 1    | BY            | -           | -       | N/A   | ++++    | +++         | 10.30   | 24.14        |  |
| 2    | NI            | -           | -       | N/A   | ++++    | ++++        | 13.03   | 25.08        |  |
| 3    | BY            | -           | -       | N/A   | ++++    | ++++        | 11.35   | 23.77        |  |
| 4    | NI            | -           | -       | N/A   | ++      | +++         | 20.94   | 21.24        |  |
| 5    | BY            | -           | -       | N/A   | ++++    | ++++        | 8.46    | 23.95        |  |
| 6    | BY            | ++++        | ++++    | 16.14 | +++     | ++++        | 11.23   | 19.53        |  |
| 7    | NI            | -           | (+)     | 35.26 | +++     | ++++        | 19.17   | 23.83        |  |
| 8    | RP            | NP          | +       | 34.39 | NP      | ++++        | 9.78    | 20.18        |  |
| 9    | MV            | NP          | +       | 34.84 | NP      | +++         | 22.29   | 24.85        |  |
| 10   | NI            | NP          | -       | N/A   | NP      | ++++        | 8.14    | 26.22        |  |
| 11   | HE            | NP          | -       | N/A   | NP      | ++++        | 13.02   | 26.26        |  |
| 12   | BY            | NP          | -       | N/A   | NP      | ++++        | 7.76    | 22.31        |  |
| 13   | NW            | NP          | -       | N/A   | NP      | ++++        | 10.63   | 27.96        |  |
| 14   | BW            | NP          | ++      | 30.3  | NP      | ++++        | 16.85   | 24.43        |  |
| 15   | BW            | NP          | -       | N/A   | NP      | ++++        | 10.98   | 22.32        |  |
| 16   | BB            | NP          | (+)     | 35.77 | NP      | +++         | 27.28   | 18.01        |  |
| 17   | BW            | NP          | -       | N/A   | NP      | +++         | 25.99   | 18.95        |  |
| 18   | BW            | NP          | -       | N/A   | NP      | ++          | 30.89   | 20.09        |  |
| 19   | BW            | NP          | +       | 32.63 | NP      | ++++        | 13.80   | 22.44        |  |
| 20   | SN            | NP          | -       | N/A   | NP      | ++          | 28.32   | 20.27        |  |
| 21   | BY            | NP          | -       | N/A   | NP      | +++         | 21.21   | 19.66        |  |
| 22   | BW            | NP          | -       | N/A   | NP      | ++          | 31.83   | 19.26        |  |
| 23   | NW            | NP          | -       | N/A   | NP      | +++         | 24.60   | 20.30        |  |
| 24   | BW            | NP          | -       | N/A   | NP      | +           | 32.22   | 19.76        |  |
| 25   | BY            | NP          | -       | N/A   | NP      | ++          | 31.28   | 19.36        |  |
| 26   | BW            | NP          | -       | N/A   | NP      | +++         | 20.26   | 21.35        |  |
| 27   | BB            | NP          | -       | N/A   | NP      | ++          | 30.01   | 21.74        |  |
| 28   | BY            | NP          | -       | N/A   | NP      | ++++        | 19.93   | 20.13        |  |
| 29   | NW            | NP          | -       | N/A   | NP      | +++         | 22.12   | 21.73        |  |
| 30   | NW            | NP          | -       | N/A   | NP      | ++++        | 14.54   | 16.07        |  |
| 31   | BY            | NP          | -       | N/A   | NP      | ++          | 29.18   | 22.19        |  |



|    |    |    |      |       |    |      |       |       |
|----|----|----|------|-------|----|------|-------|-------|
| 32 | BE | NP | -    | N/A   | NP | ++   | 30.44 | 17.83 |
| 33 | NI | NP | -    | N/A   | NP | +++  | 27.09 | 21.16 |
| 34 | BW | NP | -    | N/A   | NP | +++  | 27.60 | 20.40 |
| 35 | SN | NP | -    | N/A   | NP | ++   | 30.78 | 21.31 |
| 36 | TH | NP | -    | N/A   | NP | ++   | 30.58 | 21.65 |
| 37 | BY | NP | -    | N/A   | NP | (+)  | 35.24 | 19.83 |
| 38 | BW | NP | -    | N/A   | NP | +    | 34.32 | 21.69 |
| 39 | SN | NP | -    | N/A   | NP | ++   | 31.80 | 21.40 |
| 40 | NI | NP | -    | N/A   | NP | ++   | 29.50 | 20.01 |
| 41 | BY | NP | -    | N/A   | NP | +    | 32.50 | 19.40 |
| 42 | NW | NP | -    | N/A   | NP | ++   | 29.06 | 18.03 |
| 43 | BW | NP | -    | N/A   | NP | ++   | 28.15 | 23.56 |
| 44 | BW | NP | -    | N/A   | NP | ++   | 30.14 | 21.80 |
| 45 | NI | NP | -    | N/A   | NP | ++++ | 12.18 | 23.51 |
| 46 | BW | NP | -    | N/A   | NP | ++   | 28.77 | 22.57 |
| 47 | RP | NP | -    | N/A   | NP | (+)  | 35.17 | 23.43 |
| 48 | NW | NP | -    | N/A   | NP | ++   | 28.01 | 17.35 |
| 49 | BY | NP | -    | N/A   | NP | +++  | 23.29 | 21.34 |
| 50 | NW | NP | -    | N/A   | NP | ++++ | 13.58 | 21.54 |
| 51 | MV | NP | -    | N/A   | NP | +++  | 23.69 | 25.05 |
| 52 | MV | NP | -    | N/A   | NP | +++  | 26.87 | 25.08 |
| 53 | NI | NP | -    | N/A   | NP | +++  | 27.07 | 19.67 |
| 54 | MV | NP | -    | N/A   | NP | +++  | 25.78 | 24.88 |
| 55 | SN | NP | -    | N/A   | NP | +++  | 26.02 | 18.53 |
| 56 | NI | NP | -    | N/A   | NP | +    | 33.62 | 22.00 |
| 57 | SL | NP | (+)  | 35.01 | NP | ++   | 31.48 | 21.42 |
| 58 | BW | NP | -    | N/A   | NP | +++  | 27.68 | 22.41 |
| 59 | HE | NP | -    | N/A   | NP | ++   | 30.38 | 21.20 |
| 60 | BY | NP | -    | N/A   | NP | +    | 33.23 | 21.13 |
| 61 | HH | NP | -    | N/A   | NP | (+)  | 35.10 | 22.19 |
| 62 | BW | NP | -    | N/A   | NP | +    | 34.85 | 21.10 |
| 63 | HE | NP | -    | N/A   | NP | ++   | 31.57 | 21.56 |
| 64 | BY | NP | -    | N/A   | NP | +    | 32.94 | 24.84 |
| 65 | BW | NP | -    | N/A   | NP | +++  | 23.46 | 21.56 |
| 66 | BY | NP | -    | N/A   | NP | ++   | 30.27 | 24.78 |
| 67 | SN | NP | -    | N/A   | NP | +++  | 23.39 | 23.43 |
| 68 | BY | NP | -    | N/A   | NP | +++  | 23.27 | 24.64 |
| 69 | BY | NP | -    | N/A   | NP | ++++ | 5.97  | 20.77 |
| 70 | NI | NP | -    | N/A   | NP | (+)  | 36.07 | 17.81 |
| 71 | NY | NP | -    | N/A   | NP | +++  | 27.74 | 23.70 |
| 72 | BW | NP | -    | N/A   | NP | ++++ | 7.83  | 19.13 |
| 73 | BW | NP | -    | N/A   | NP | +++  | 22.27 | 23.37 |
| 74 | NI | NP | -    | N/A   | NP | ++++ | 11.74 | 23.96 |
| 75 | NW | NP | -    | N/A   | NP | ++++ | 13.36 | 25.68 |
| 76 | BB | NP | -    | N/A   | NP | ++++ | 13.68 | 23.97 |
| 77 | NW | NP | -    | N/A   | NP | ++++ | 13.25 | 23.68 |
| 78 | BB | NP | -    | N/A   | NP | ++++ | 11.12 | 23.11 |
| 79 | ST | NP | ++++ | 16.45 | NP | ++++ | 11.53 | 23.13 |
| 80 | NW | NP | (+)  | 35.62 | NP | ++++ | 9.83  | 25.00 |
| 81 | BY | NP | -    | N/A   | NP | ++++ | 12.00 | 25.53 |
| 82 | NI | NP | -    | N/A   | NP | ++++ | 11.42 | 24.22 |

NP: not performed

N/A: no Cq value

|    | federal state              |
|----|----------------------------|
| BE | Berlin                     |
| BY | Bavaria                    |
| BB | Brandenburg                |
| BW | Baden-Württemberg          |
| HE | Hesse                      |
| HH | Hamburg                    |
| MV | Mecklenburg-West Pomerania |
| NI | Lower Saxony               |
| NW | North Rhine-Westphalia     |
| RP | Rhineland-Palatinate       |
| SN | Saxony                     |
| ST | Saxony-Anhalt              |
| SH | Schleswig-Holstein         |
| SL | Saarland                   |

|    |           |
|----|-----------|
| TH | Thuringia |
|----|-----------|

Table S5. Results of screening Italian honey bees from 2009, 2011, 2013, 2018 and 2020 by NGS (transcriptome) analysis

|           | year                     | sample                   | total number of reads    | reads mapping on DWV (DWV-C included) | reads mapping on DWV (DWV-C excluded) | reads mapping on DWV-A | reads mapping on DWV-B |               |
|-----------|--------------------------|--------------------------|--------------------------|---------------------------------------|---------------------------------------|------------------------|------------------------|---------------|
| Dataset 1 | 2009                     | uninfested pool 1        | 11536226                 | 1110888                               | 1110888                               | 1110888                | 0                      |               |
|           |                          | uninfested pool 2        | 16201184                 | 917173                                | 917172                                | 917172                 | 0                      |               |
|           |                          | uninfested pool 3        | 15251861                 | 2442                                  | 2442                                  | 2442                   | 0                      |               |
|           |                          | uninfested pool 4        | 18497764                 | 14309                                 | 14309                                 | 14309                  | 0                      |               |
|           |                          | uninfested pool 5        | 14257889                 | 2071                                  | 2071                                  | 2071                   | 0                      |               |
|           |                          | uninfested pool 6        | 17501781                 | 1146                                  | 1146                                  | 1146                   | 0                      |               |
|           |                          |                          | <b>total reads</b>       | <b>93246705.00</b>                    | <b>2048029.00</b>                     | <b>2048028.00</b>      | <b>2048028.00</b>      | <b>0.00</b>   |
|           |                          |                          | <b>total DWV-C reads</b> |                                       | 1                                     |                        |                        |               |
|           |                          |                          | mite-infested pool 1     | 16538777                              | 1245925                               | 1245925                | 1245925                | 0             |
|           |                          |                          | mite-infested pool 2     | 16784485                              | 2063448                               | 2063448                | 2063448                | 0             |
|           |                          |                          | mite-infested pool 3     | 13663436                              | 2139109                               | 2139109                | 2139109                | 2             |
|           |                          |                          | mite-infested pool 4     | 15456204                              | 3381768                               | 3381768                | 3381763                | 5             |
|           |                          |                          | mite-infested pool 5     | 14470976                              | 25387                                 | 25387                  | 25387                  | 0             |
|           |                          |                          | <b>total reads</b>       | <b>76913878</b>                       | <b>8855637.00</b>                     | <b>8855637.00</b>      | <b>8855630</b>         | <b>7</b>      |
|           |                          |                          | <b>total DWV-C reads</b> |                                       | 0                                     |                        |                        |               |
|           | Dataset 2                |                          | uninfested bee 1         | 27338758                              | 24581894                              | 24490083               | 24439478               | 50605         |
|           |                          | uninfested bee 2         | 18225222                 | 140409                                | 139766                                | 139604                 | 162                    |               |
|           |                          | uninfested bee 3         | 24683141                 | 91893                                 | 91508                                 | 91379                  | 129                    |               |
|           |                          | uninfested bee 4         | 19927120                 | 65067                                 | 64837                                 | 64737                  | 100                    |               |
|           |                          | uninfested bee 5         | 16706666                 | 74394                                 | 74116                                 | 73965                  | 151                    |               |
|           |                          | <b>total reads</b>       | <b>106880907</b>         | <b>24953657.00</b>                    | <b>24860310.00</b>                    | <b>24809163</b>        | <b>51147</b>           |               |
|           |                          | <b>total DWV-C reads</b> |                          | 93347                                 |                                       |                        |                        |               |
|           |                          | mite-infested bee 1      | 26007148                 | 15788464                              | 15746550                              | 15655241               | 91309                  |               |
|           |                          | mite-infested bee 2      | 27712817                 | 19703485                              | 19644010                              | 19624466               | 19544                  |               |
|           |                          | mite-infested bee 3      | 10804739                 | 315161                                | 314459                                | 312790                 | 1669                   |               |
|           |                          | mite-infested bee 4      | 15344334                 | 9362012                               | 9345969                               | 9261359                | 84610                  |               |
|           |                          | mite-infested bee 5      | 27732490                 | 82576                                 | 82374                                 | 81986                  | 388                    |               |
|           |                          | mite-infested bee 6      | 21260599                 | 18295895                              | 18252915                              | 18060353               | 192562                 |               |
|           |                          | mite-infested bee 7      | 33012513                 | 2836339                               | 2829168                               | 2801257                | 27911                  |               |
|           |                          | mite-infested bee 8      | 30313176                 | 26418753                              | 26374137                              | 26175384               | 198753                 |               |
|           |                          | mite-infested bee 9      | 25472838                 | 195539                                | 195072                                | 193629                 | 1443                   |               |
|           |                          | mite-infested bee 10     | 24363190                 | 17240125                              | 17233102                              | 17130081               | 103021                 |               |
|           |                          | <b>total reads</b>       | <b>242023844</b>         | <b>110238349</b>                      | <b>110017756</b>                      | <b>109296546</b>       | <b>721210</b>          |               |
|           |                          | <b>total DWV-C reads</b> |                          | 220593                                |                                       |                        |                        |               |
| Dataset 3 |                          | 2011                     | uninfested bee 1         | 16585099                              | 2545148                               | 2544935                | 2538049                | 6886          |
|           | uninfested bee 2         |                          | 18661501                 | 1142493                               | 1142388                               | 1139158                | 3230                   |               |
|           | uninfested bee 3         |                          | 13668515                 | 6401096                               | 6399878                               | 6380508                | 19370                  |               |
|           | uninfested bee 4         |                          | 64987582                 | 63092                                 | 63043                                 | 62739                  | 304                    |               |
|           | uninfested bee 5         |                          | 20691901                 | 1477744                               | 1477603                               | 1473447                | 4156                   |               |
|           | uninfested bee 6         |                          | 27549466                 | 43609                                 | 43587                                 | 43421                  | 166                    |               |
|           | uninfested bee 7         |                          | 40532610                 | 9655456                               | 9654551                               | 9651044                | 3507                   |               |
|           | uninfested bee 8         |                          | 27133067                 | 7088572                               | 7088125                               | 7068622                | 19503                  |               |
|           | uninfested bee 9         |                          | 27589678                 | 8196912                               | 8196299                               | 8173465                | 22834                  |               |
|           | uninfested bee 10        |                          | 26444038                 | 7024101                               | 7023453                               | 7002948                | 20505                  |               |
|           | uninfested bee 11        |                          | 35507263                 | 2001104                               | 2000906                               | 1995092                | 5814                   |               |
|           | uninfested bee 12        |                          | 30643697                 | 52795                                 | 52775                                 | 52558                  | 217                    |               |
|           |                          |                          | <b>total reads</b>       | <b>349994417</b>                      | <b>45692122</b>                       | <b>45687543</b>        | <b>45581051</b>        | <b>106492</b> |
|           | <b>total DWV-C reads</b> |                          | 4579                     |                                       |                                       |                        |                        |               |
| Dataset 4 |                          | uninfested bee 1         | 71305572                 | 72484                                 | 72385                                 | 71984                  | 401                    |               |
|           |                          | uninfested bee 2         | 15419572                 | 8033                                  | 8025                                  | 7988                   | 37                     |               |
|           |                          | uninfested bee 3         | 24120778                 | 8671                                  | 8659                                  | 8618                   | 41                     |               |
|           |                          | uninfested bee 4         | 17990726                 | 10419                                 | 10405                                 | 10355                  | 50                     |               |
|           |                          | uninfested bee 5         | 8111239                  | 4919                                  | 4905                                  | 4889                   | 16                     |               |
|           |                          | uninfested bee 6         | 42176770                 | 15141                                 | 15126                                 | 15039                  | 87                     |               |
|           |                          | uninfested bee 7         | 64845317                 | 75898                                 | 75823                                 | 75412                  | 411                    |               |
|           |                          | uninfested bee 8         | 29190286                 | 13111                                 | 13093                                 | 13038                  | 55                     |               |
|           |                          | <b>total reads</b>       | <b>273160260</b>         | <b>208676</b>                         | <b>208421</b>                         | <b>207323</b>          | <b>1098</b>            |               |
|           |                          | <b>total DWV-C reads</b> |                          | 255                                   |                                       |                        |                        |               |
|           |                          | mite-infested bee 1      | 13786900                 | 4467251                               | 4466823                               | 4450683                | 16140                  |               |
|           |                          | mite-infested bee 2      | 20815189                 | 7311308                               | 7310205                               | 7302671                | 7534                   |               |
|           |                          | mite-infested bee 3      | 89603735                 | 59103402                              | 59095591                              | 58873136               | 222455                 |               |
|           |                          | mite-infested bee 4      | 29549793                 | 8184379                               | 8183918                               | 8178226                | 5692                   |               |
|           |                          | mite-infested bee 5      | 36029093                 | 4041408                               | 4041234                               | 4034433                | 6801                   |               |
|           |                          | mite-infested bee 6      | 9595069                  | 595227                                | 595200                                | 593419                 | 1781                   |               |
|           |                          | mite-infested bee 7      | 74198847                 | 19901331                              | 19894818                              | 19866740               | 28078                  |               |
|           |                          | mite-infested bee 8      | 29049478                 | 6747669                               | 6747241                               | 6726767                | 20474                  |               |
|           |                          | <b>total reads</b>       | <b>302628104</b>         | <b>110351975</b>                      | <b>110335030</b>                      | <b>110026075</b>       | <b>308955</b>          |               |
|           |                          | <b>total DWV-C reads</b> |                          | 16945                                 |                                       |                        |                        |               |
| Dataset 5 | 2013                     | uninfested bee 1         | 13467853                 | 0                                     | 0                                     | 0                      | 0                      |               |
|           |                          | uninfested bee 2         | 14117562                 | 0                                     | 0                                     | 0                      | 0                      |               |
|           |                          | uninfested bee 3         | 12358540                 | 1                                     | 1                                     | 1                      | 0                      |               |
|           |                          | uninfested bee 4         | 13743339                 | 2                                     | 2                                     | 2                      | 0                      |               |
|           |                          | uninfested bee 5         | 11857628                 | 1                                     | 1                                     | 1                      | 0                      |               |
|           |                          | <b>total reads</b>       | <b>65544922</b>          | <b>4</b>                              | <b>4</b>                              | <b>4</b>               | <b>0</b>               |               |
|           |                          | <b>total DWV-C reads</b> |                          | 0                                     |                                       |                        |                        |               |
|           |                          | mite-infested bee 1      | 65519                    | 50327                                 | 50327                                 | 50327                  | 0                      |               |
|           |                          | mite-infested bee 2      | 181002                   | 115151                                | 115151                                | 115151                 | 0                      |               |
|           |                          | mite-infested bee 3      | 147800                   | 116213                                | 116213                                | 116213                 | 0                      |               |
|           |                          | mite-infested bee 4      | 147595                   | 109693                                | 109693                                | 109693                 | 0                      |               |
|           |                          | mite-infested bee 5      | 147078                   | 122643                                | 122643                                | 122643                 | 0                      |               |
|           |                          | mite-infested bee 6      | 204784                   | 168354                                | 168354                                | 168354                 | 0                      |               |
|           |                          | mite-infested bee 7      | 160839                   | 123704                                | 123704                                | 123704                 | 0                      |               |
|           |                          | mite-infested bee 8      | 101776                   | 77837                                 | 77837                                 | 77837                  | 0                      |               |
|           |                          | mite-infested bee 9      | 231039                   | 177524                                | 177524                                | 177524                 | 0                      |               |
|           | <b>total reads</b>       | <b>1387432</b>           | <b>1061446</b>           | <b>1061446</b>                        | <b>1061446</b>                        | <b>0</b>               |                        |               |
|           | <b>total DWV-C reads</b> |                          | 0                        |                                       |                                       |                        |                        |               |
| Dataset 6 | 2018                     | uninfested bee 1         | 19141031                 | 4847                                  | 4847                                  | 93                     | 4754                   |               |
|           |                          | uninfested bee 2         | 16524486                 | 5251                                  | 5251                                  | 1                      | 5250                   |               |
|           |                          | uninfested bee 3         | 20462249                 | 19311                                 | 19311                                 | 5                      | 19306                  |               |
|           |                          | uninfested bee 4         | 16133716                 | 663                                   | 663                                   | 0                      | 663                    |               |
|           |                          | uninfested bee 5         | 16230611                 | 151                                   | 151                                   | 4                      | 147                    |               |
|           |                          | uninfested bee 6         | 17500546                 | 6797                                  | 6797                                  | 645                    | 6152                   |               |
|           |                          | uninfested bee 7         | 16749836                 | 11886                                 | 11886                                 | 432                    | 11454                  |               |
|           | <b>total reads</b>       | <b>122742475</b>         | <b>48906</b>             | <b>48906</b>                          | <b>1180</b>                           | <b>47726</b>           |                        |               |
|           | <b>total DWV-C reads</b> |                          | 0                        |                                       |                                       |                        |                        |               |
| Dataset 7 | 2020                     | uninfested bee 1         | 14431503                 | 6419731                               | 6419731                               | 128157                 | 6291574                |               |
|           |                          | uninfested bee 2         | 17069982                 | 1090                                  | 1090                                  | 9                      | 1081                   |               |
|           |                          | uninfested bee 3         | 16067757                 | 309                                   | 309                                   | 1                      | 308                    |               |
|           |                          | uninfested bee 4         | 15482104                 | 69                                    | 69                                    | 0                      | 69                     |               |

|                          |                  |                  |                  |                |                  |
|--------------------------|------------------|------------------|------------------|----------------|------------------|
| uninfested bee 5         | 15883722         | 366              | 366              | 0              | 366              |
| uninfested bee 6         | 17927750         | 47               | 47               | 0              | 47               |
| uninfested bee 7         | 14414577         | 360              | 360              | 0              | 360              |
| uninfested bee 8         | 19214407         | 146              | 146              | 0              | 146              |
| uninfested bee 9         | 15741775         | 815              | 815              | 1              | 814              |
| uninfested bee 10        | 14283263         | 50               | 50               | 0              | 50               |
| uninfested bee 11        | 17668010         | 290204           | 290204           | 486            | 289718           |
| uninfested bee 12        | 16393828         | 1321             | 1321             | 29             | 1292             |
| uninfested bee 13        | 17074188         | 9188             | 9188             | 14             | 9174             |
| uninfested bee 14        | 19399753         | 48               | 48               | 0              | 48               |
| <b>total reads</b>       | <b>231052619</b> | <b>6723744</b>   | <b>6723744</b>   | <b>128697</b>  | <b>6595047</b>   |
| <b>total DWV-C reads</b> |                  | <b>0</b>         |                  |                |                  |
| mite-infested bee 1      | 16919989         | 11638998         | 11638998         | 4291           | 11634707         |
| mite-infested bee 2      | 16930615         | 11255            | 11255            | 44             | 11211            |
| mite-infested bee 3      | 20376974         | 15787640         | 15787640         | 505044         | 15282596         |
| mite-infested bee 4      | 14767139         | 2851             | 2851             | 11             | 2840             |
| mite-infested bee 5      | 19222572         | 8936775          | 8936775          | 4              | 8936771          |
| mite-infested bee 6      | 26633315         | 12649166         | 12649166         | 6              | 12649160         |
| mite-infested bee 7      | 14745920         | 2538             | 2538             | 4              | 2534             |
| mite-infested bee 8      | 21243366         | 16232426         | 16232426         | 626545         | 15605881         |
| mite-infested bee 9      | 19561829         | 14749896         | 14749896         | 514674         | 14235222         |
| mite-infested bee 10     | 16203254         | 11928140         | 11928140         | 18161          | 11909979         |
| mite-infested bee 11     | 17846502         | 63094            | 63094            | 5              | 63089            |
| mite-infested bee 12     | 19194956         | 12641150         | 12641150         | 42             | 12641108         |
| mite-infested bee 13     | 20896155         | 13392559         | 13392559         | 719            | 13391840         |
| mite-infested bee 14     | 14674535         | 9461771          | 9461771          | 1391           | 9460380          |
| <b>total reads</b>       | <b>259217121</b> | <b>127498259</b> | <b>127498259</b> | <b>1670941</b> | <b>125827318</b> |
| <b>total DWV-C reads</b> |                  | <b>0</b>         |                  |                |                  |
| 2018-20 total reads      | 613012215        |                  |                  |                |                  |
| 2009-2013 total reads    | 1618661376.00    |                  |                  |                |                  |
